# Supplementary material for: Species-Level Salivary Microbial Indicators of Well-Resolved Periodontitis: A Preliminary Investigation
Source: Front Cell Infect Microbiol. 2019 Oct 11;9:347. doi: 10.3389/fcimb.2019.00347 (PMC6797555; doi:10.3389/fcimb.2019.00347)
Supplement: Supplementary file 1 [file Data_Sheet_1.xlsx]

## Sheet: Table S1_Read Count Details
Table S5_ Read Count Details
Category	Read Count
Total reads	89660
Total assigned reads	65166
Assigned reads in samples with read count < 500	1332
Total samples	39
Samples with >500 reads	35
Samples with at least 500 reads	4
Total assigned reads used for analysis	63834
Reads assigned to single species	56399
Reads assigned to multiple species	7413
Reads assigned to novel species	22
Total number of species	418
Number of single species	358
Number of multi-species	51
Number of novel species	6
Total unassigned reads	24494
Chimeric reads	134
Reads without BLASTN hits	0
Others: short, low quality, singletons, etc.	24360

## Sheet: Table S2_Species Abundances
Table S2_Relative Species Abundances by Sample
Single Species
Multiple species
Novel speccies
Sample ID	1S	2S	5S	6S	8S	11S	12S	13S	15S	17S	20S	21S	22S	23S	24S	25S	26S	27S	28S	29S	30S	31S	32S	33S	34S	35S	36S	37S	38S	39S	40S	41S	43S	44S	45S
Read Count Per Sample	551	566	2476	2192	2810	2441	1608	1942	1972	2132	1542	668	1369	1065	1539	1849	1671	1450	2931	1589	1598	1195	1778	2170	3355	1565	1794	2258	2095	2425	2322	1511	1774	1669	1962
Species-Level Taxomonomy
k__Bacteria;p__Actinobacteria;c__Actinobacteria;o__Actinomycetales;f__Actinomycetaceae;g__Actinobaculum;s__sp._oral_taxon_183	0	0.00176678	0	0	0.000711744	0	0	0.000514933	0	0	0	0	0	0	0	0	0	0	0	0	0	0	0	0	0	0	0	0	0	0.000412371	0	0.00330907	0	0	0
k__Bacteria;p__Actinobacteria;c__Actinobacteria;o__Actinomycetales;f__Actinomycetaceae;g__Actinomyces;s__cardiffensis	0	0	0	0	0	0	0	0.000514933	0	0	0	0	0	0	0	0	0	0	0	0	0	0	0	0	0	0	0	0	0	0	0	0	0	0	0
k__Bacteria;p__Actinobacteria;c__Actinobacteria;o__Actinomycetales;f__Actinomycetaceae;g__Actinomyces;s__georgiae	0	0	0	0	0	0	0	0.000514933	0	0	0	0	0	0	0	0	0	0	0	0	0	0	0	0	0	0	0	0	0	0	0	0	0	0	0
k__Bacteria;p__Actinobacteria;c__Actinobacteria;o__Actinomycetales;f__Actinomycetaceae;g__Actinomyces;s__gerencseriae	0	0	0.000403877	0	0	0	0	0	0	0	0	0	0	0	0	0	0	0	0	0	0	0	0	0	0	0	0	0	0	0	0	0	0	0	0
k__Bacteria;p__Actinobacteria;c__Actinobacteria;o__Actinomycetales;f__Actinomycetaceae;g__Actinomyces;s__graevenitzii	0	0	0.00121163	0	0	0	0.0155473	0.000514933	0	0.000938086	0.00648508	0	0.157779	0.0056338	0.0207927	0.003245	0.00239378	0	0.000682361	0.000629327	0	0	0.0179978	0.00184332	0.000298063	0	0.00334448	0.0044287	0	0	0	0.000661813	0	0.000599161	0
k__Bacteria;p__Actinobacteria;c__Actinobacteria;o__Actinomycetales;f__Actinomycetaceae;g__Actinomyces;s__johnsonii	0	0	0	0	0	0	0	0.000514933	0	0.000469043	0	0	0	0	0	0	0	0	0	0	0	0	0	0	0	0	0	0	0	0	0	0	0	0	0
k__Bacteria;p__Actinobacteria;c__Actinobacteria;o__Actinomycetales;f__Actinomycetaceae;g__Actinomyces;s__lingnae_[NVP]	0.00362976	0.00176678	0.00282714	0.00182482	0.000355872	0	0.000621891	0.00205973	0	0.00140713	0.00194553	0.00299401	0.0036523	0.00187793	0.00129955	0	0.0299222	0	0.00136472	0.00377596	0.000625782	0.00083682	0.00168729	0.000460829	0.00119225	0.0108626	0.00167224	0.00132861	0.000954654	0.00206186	0	0.00397088	0.000563698	0.00119832	0
k__Bacteria;p__Actinobacteria;c__Actinobacteria;o__Actinomycetales;f__Actinomycetaceae;g__Actinomyces;s__massiliensis	0	0	0	0	0	0	0.000621891	0	0	0	0	0	0	0	0	0	0.000598444	0	0	0	0	0	0	0.000460829	0	0	0	0	0	0	0	0.000661813	0	0	0
k__Bacteria;p__Actinobacteria;c__Actinobacteria;o__Actinomycetales;f__Actinomycetaceae;g__Actinomyces;s__meyeri	0	0	0	0	0	0	0	0	0	0	0.000648508	0	0	0	0	0	0	0	0.00034118	0	0	0	0	0	0	0	0	0	0	0	0	0	0	0	0
k__Bacteria;p__Actinobacteria;c__Actinobacteria;o__Actinomycetales;f__Actinomycetaceae;g__Actinomyces;s__multispecies_spp6_2	0	0	0	0	0	0	0.000621891	0.000514933	0	0.000469043	0	0	0	0	0.000649773	0	0	0	0.00034118	0.00125865	0	0	0.00449944	0	0.000298063	0.00255591	0.00111483	0.00044287	0.000477327	0.000824742	0	0.00132363	0	0	0
k__Bacteria;p__Actinobacteria;c__Actinobacteria;o__Actinomycetales;f__Actinomycetaceae;g__Actinomyces;s__naeslundii	0	0	0.000403877	0	0	0	0	0.000514933	0	0.00234522	0	0	0	0	0	0	0	0	0.000682361	0	0	0	0	0	0.000596125	0	0	0	0	0	0	0.000661813	0	0	0
k__Bacteria;p__Actinobacteria;c__Actinobacteria;o__Actinomycetales;f__Actinomycetaceae;g__Actinomyces;s__odontolyticus	0.00362976	0	0.00363489	0.00228102	0.00213523	0	0.00124378	0.0015448	0	0.00281426	0.00453956	0	0.00073046	0.000938967	0.000649773	0.00108167	0.0335129	0.000689655	0.00272944	0.0245437	0	0.00167364	0.00112486	0.00368664	0.00178838	0.00894569	0.0111483	0.00044287	0	0.00123711	0.00172265	0.00926539	0	0.000599161	0.00407747
k__Bacteria;p__Actinobacteria;c__Actinobacteria;o__Actinomycetales;f__Actinomycetaceae;g__Actinomyces;s__oris	0	0	0	0	0	0	0	0	0	0	0	0	0	0.000938967	0	0	0	0	0	0	0	0	0	0	0	0	0	0	0	0	0	0.000661813	0	0	0
k__Bacteria;p__Actinobacteria;c__Actinobacteria;o__Actinomycetales;f__Actinomycetaceae;g__Actinomyces;s__sp._oral_taxon_169	0	0	0.000403877	0	0.000711744	0	0.00248756	0.00102987	0	0.000469043	0	0	0.00146092	0	0	0	0	0.00137931	0	0	0	0.00083682	0	0.000460829	0	0	0	0	0	0	0.000430663	0	0	0	0
k__Bacteria;p__Actinobacteria;c__Actinobacteria;o__Actinomycetales;f__Actinomycetaceae;g__Actinomyces;s__sp._oral_taxon_171	0	0	0	0	0	0	0	0	0	0	0	0	0	0	0	0	0	0	0	0	0	0	0	0	0	0	0.000557414	0	0	0	0	0	0	0	0
k__Bacteria;p__Actinobacteria;c__Actinobacteria;o__Actinomycetales;f__Actinomycetaceae;g__Actinomyces;s__sp._oral_taxon_172	0.00362976	0.00176678	0.0109047	0.000456204	0.000355872	0	0.00310945	0.0015448	0.0010142	0.000469043	0.0162127	0	0	0.000938967	0.00389864	0	0.000598444	0.000689655	0.00136472	0.00188798	0.000625782	0.00083682	0.00843645	0.00276498	0	0	0.00334448	0.0088574	0	0.000824742	0	0.039047	0	0.00119832	0.00356779
k__Bacteria;p__Actinobacteria;c__Actinobacteria;o__Actinomycetales;f__Actinomycetaceae;g__Actinomyces;s__sp._oral_taxon_178	0	0	0	0	0	0	0	0	0	0	0	0	0	0	0	0	0	0	0.00034118	0	0	0	0	0	0	0	0	0	0	0	0	0.000661813	0	0	0
k__Bacteria;p__Actinobacteria;c__Actinobacteria;o__Actinomycetales;f__Actinomycetaceae;g__Actinomyces;s__sp._oral_taxon_180	0	0	0	0	0	0	0	0	0	0	0	0	0	0	0.00389864	0.000540833	0	0	0	0	0	0	0	0	0	0	0.000557414	0	0	0	0	0.0132363	0	0	0
k__Bacteria;p__Actinobacteria;c__Actinobacteria;o__Actinomycetales;f__Actinomycetaceae;g__Actinomyces;s__sp._oral_taxon_448	0	0	0	0	0	0	0	0	0	0	0.000648508	0	0	0	0	0	0	0	0	0	0	0	0	0	0	0	0	0	0	0	0	0	0	0	0
k__Bacteria;p__Actinobacteria;c__Actinobacteria;o__Actinomycetales;f__Actinomycetaceae;g__Actinomyces;s__viscosus	0	0	0	0	0	0	0.00124378	0	0	0	0	0	0.00073046	0	0	0	0	0	0.000682361	0	0	0	0	0	0	0	0	0	0	0	0	0	0	0	0
k__Bacteria;p__Actinobacteria;c__Actinobacteria;o__Actinomycetales;f__Micrococcaceae;g__Rothia;s__aeria	0.00362976	0.0106007	0	0.0260036	0.0088968	0.000819336	0.00248756	0.00411946	0.00557809	0.0239212	0.00129702	0.00149701	0.00073046	0.0384977	0	0.00757166	0	0.0255172	0.0017059	0.00188798	0.00625782	0.0225941	0.133296	0.00184332	0.000298063	0	0.00222965	0	0	0.00536082	0.00129199	0.00661813	0.0197294	0.00239664	0
k__Bacteria;p__Actinobacteria;c__Actinobacteria;o__Actinomycetales;f__Micrococcaceae;g__Rothia;s__dentocariosa	0.00181488	0.00176678	0.00403877	0.0168796	0.0206406	0.000819336	0.0329602	0.00102987	0.0010142	0.0032833	0	0.00149701	0.00584368	0.00469484	0.00129955	0.00648999	0.00119689	0.0331034	0	0	0	0.0301255	0.023622	0.0119816	0.00119225	0	0.00278707	0.00132861	0	0.000824742	0.00645995	0.031767	0.00281849	0	0
k__Bacteria;p__Actinobacteria;c__Actinobacteria;o__Actinomycetales;f__Micrococcaceae;g__Rothia;s__mucilaginosa	0.333938	0.065371	0.0343296	0.020073	0.17153	0.0344121	0.0677861	0.0643666	0.0141988	0.0694184	0.0583658	0.0553892	0.103725	0.0384977	0.0233918	0.0443483	0.114303	0.0331034	0.0153531	0.0220264	0.127034	0.0225941	0.0151856	0.145161	0.0196721	0.0402556	0.0211817	0.010186	0.177566	0.0585567	0.0180879	0.0595632	0.0462232	0.014979	0.0800204
k__Bacteria;p__Actinobacteria;c__Actinobacteria;o__Bifidobacteriales;f__Bifidobacteriaceae;g__Alloscardovia;s__omnicolens	0	0	0	0	0	0	0	0	0	0	0	0	0	0	0	0	0	0	0	0	0	0	0	0.000460829	0	0	0	0	0.000477327	0	0	0	0	0	0
k__Bacteria;p__Actinobacteria;c__Actinobacteria;o__Bifidobacteriales;f__Bifidobacteriaceae;g__Bifidobacterium;s__dentium	0	0	0	0	0	0	0	0.000514933	0	0	0	0	0.00073046	0	0	0	0	0	0	0	0	0	0	0	0	0	0	0	0	0	0	0	0	0	0
k__Bacteria;p__Actinobacteria;c__Actinobacteria;o__Bifidobacteriales;f__Bifidobacteriaceae;g__Scardovia;s__wiggsiae	0	0	0	0	0	0	0	0	0	0	0	0	0.00146092	0	0	0	0.00299222	0	0	0	0	0	0	0	0	0	0	0	0	0	0	0	0	0	0
k__Bacteria;p__Actinobacteria;c__Actinobacteria;o__Corynebacteriales;f__Corynebacteriaceae;g__Corynebacterium;s__accolens	0	0	0	0	0	0	0	0	0	0	0	0	0	0	0	0.000540833	0	0	0	0	0	0	0	0	0	0	0	0	0	0	0	0	0	0	0
k__Bacteria;p__Actinobacteria;c__Actinobacteria;o__Corynebacteriales;f__Corynebacteriaceae;g__Corynebacterium;s__argentoratense	0	0	0	0	0	0	0	0	0	0	0	0	0	0	0	0	0	0	0	0	0	0	0	0	0.000298063	0	0	0	0	0	0	0	0	0	0
k__Bacteria;p__Actinobacteria;c__Actinobacteria;o__Corynebacteriales;f__Corynebacteriaceae;g__Corynebacterium;s__durum	0	0	0	0	0	0	0	0	0	0	0	0	0	0	0	0	0	0	0	0	0	0	0.00112486	0	0	0	0	0	0	0	0	0	0.000563698	0	0
k__Bacteria;p__Actinobacteria;c__Actinobacteria;o__Corynebacteriales;f__Corynebacteriaceae;g__Corynebacterium;s__matruchotii	0.00181488	0.00353357	0.00121163	0	0	0.000409668	0.00870647	0.00514933	0.000507099	0.0267355	0	0.00149701	0.00292184	0.000938967	0	0	0	0.00275862	0.00272944	0.000629327	0.00187735	0	0.00056243	0.000460829	0.00149031	0	0	0	0	0	0	0.00198544	0.00338219	0	0
k__Bacteria;p__Actinobacteria;c__Actinobacteria;o__Propionibacteriales;f__Propionibacteriaceae;g__Propionibacterium;s__sp._oral_taxon_194	0	0	0	0	0	0	0	0.00102987	0	0	0	0	0	0	0	0	0	0	0	0	0	0	0	0	0	0	0	0	0	0	0	0	0	0	0
k__Bacteria;p__Actinobacteria;c__Coriobacteriia;o__Coriobacteriales;f__Coriobacteriaceae;g__Atopobium;s__parvulum	0	0.00176678	0.0088853	0.00593066	0	0	0.00248756	0	0	0.000469043	0.0162127	0	0.00292184	0.00187793	0.0259909	0.00270416	0.010772	0	0.00750597	0.0119572	0	0	0	0.00138249	0.0241431	0.0306709	0.022854	0.0044287	0.00381862	0.0057732	0.000861326	0.00926539	0	0.00179748	0.0030581
k__Bacteria;p__Actinobacteria;c__Coriobacteriia;o__Coriobacteriales;f__Coriobacteriaceae;g__Atopobium;s__sp._oral_taxon_199	0	0	0	0	0	0	0.000621891	0	0	0	0	0	0	0	0	0.000540833	0	0	0	0	0	0	0	0	0	0	0	0	0	0	0	0	0	0	0
k__Bacteria;p__Actinobacteria;c__Coriobacteriia;o__Coriobacteriales;f__Coriobacteriaceae;g__Slackia;s__exigua	0	0	0	0	0	0	0	0	0	0	0	0	0	0	0	0.000540833	0	0	0	0	0	0	0	0	0	0	0	0	0	0	0	0	0	0	0
k__Bacteria;p__Bacteroidetes;c__Bacteroides;o__Bacteroidales;f__Prevotellaceae;g__Prevotella;s__sp._Oral_Taxon_D21	0	0	0	0	0	0	0	0.000514933	0	0	0	0	0	0	0	0	0	0	0	0	0	0	0	0	0	0	0	0	0	0	0	0	0	0	0
k__Bacteria;p__Bacteroidetes;c__Bacteroidetes_[C-1];o__Bacteroidetes_[O-1];f__Bacteroidetes_[F-1];g__Bacteroidetes_[G-3];s__sp._oral_taxon_280	0	0	0	0	0	0	0	0.00205973	0	0	0	0	0	0	0	0	0	0	0	0	0	0	0	0	0.000298063	0	0	0	0	0	0	0	0	0	0
k__Bacteria;p__Bacteroidetes;c__Bacteroidetes_[C-1];o__Bacteroidetes_[O-1];f__Bacteroidetes_[F-1];g__Bacteroidetes_[G-3];s__sp._oral_taxon_365	0	0	0	0	0	0	0	0	0	0	0	0	0	0	0	0	0	0	0	0	0	0	0	0	0	0	0.000557414	0	0	0	0	0	0	0	0
k__Bacteria;p__Bacteroidetes;c__Bacteroidetes_[C-1];o__Bacteroidetes_[O-1];f__Bacteroidetes_[F-1];g__Bacteroidetes_[G-5];s__sp._oral_taxon_505	0	0	0	0	0	0	0	0.00257467	0	0	0	0	0	0	0	0	0	0.000689655	0	0	0	0	0	0	0	0	0	0	0	0	0	0	0.00225479	0	0
k__Bacteria;p__Bacteroidetes;c__Bacteroidetes_[C-1];o__Bacteroidetes_[O-1];f__Bacteroidetes_[F-1];g__Bacteroidetes_[G-5];s__sp._oral_taxon_511	0	0	0	0	0	0	0	0	0	0	0	0	0	0	0	0	0	0.000689655	0	0	0.00125156	0	0	0	0	0	0	0	0.00143198	0	0	0	0.000563698	0	0
k__Bacteria;p__Bacteroidetes;c__Bacteroidia;o__Bacteroidales;f__Bacteroidaceae;g__Bacteroidaceae_[G-1];s__sp._oral_taxon_272	0	0	0	0	0	0	0	0.0015448	0	0	0	0	0	0	0	0	0	0	0	0	0	0	0	0	0	0	0	0	0.000954654	0	0	0	0	0	0
k__Bacteria;p__Bacteroidetes;c__Bacteroidia;o__Bacteroidales;f__Bacteroidaceae;g__Bacteroides;s__heparinolyticus	0	0	0	0	0	0	0	0	0	0	0	0	0	0	0	0	0	0.000689655	0	0	0	0	0	0	0	0	0	0	0	0	0	0	0	0	0
k__Bacteria;p__Bacteroidetes;c__Bacteroidia;o__Bacteroidales;f__Bacteroidales_[F-2];g__Bacteroidales_[G-2];s__sp._oral_taxon_274	0	0	0.000403877	0	0	0	0.000621891	0.0046344	0	0.00140713	0	0	0.00073046	0.00187793	0	0	0	0.000689655	0	0	0.00625782	0.0041841	0	0	0	0.000638978	0	0	0	0.000412371	0	0	0.00225479	0	0
k__Bacteria;p__Bacteroidetes;c__Bacteroidia;o__Bacteroidales;f__Porphyromonadaceae;g__Porphyromonas;s__catoniae	0	0.00176678	0	0	0	0.00491602	0	0	0	0.000469043	0	0	0.00073046	0.000938967	0	0	0	0	0	0	0.00125156	0	0	0	0	0	0.00167224	0	0	0	0	0.00198544	0	0	0
k__Bacteria;p__Bacteroidetes;c__Bacteroidia;o__Bacteroidales;f__Porphyromonadaceae;g__Porphyromonas;s__endodontalis	0	0.0106007	0.000403877	0	0	0.000819336	0.00373134	0.0432544	0	0	0	0	0	0	0	0	0	0.00896552	0	0	0.00250313	0.00083682	0	0.000460829	0.00178838	0.00191693	0.000557414	0.00310009	0.0052506	0.000824742	0	0.000661813	0.00789177	0	0
k__Bacteria;p__Bacteroidetes;c__Bacteroidia;o__Bacteroidales;f__Porphyromonadaceae;g__Porphyromonas;s__gingivalis	0	0	0	0.000912409	0	0.00245801	0	0.0453141	0	0	0.0077821	0.00149701	0.00073046	0	0	0	0	0.00344828	0.00102354	0.00125865	0	0	0.00112486	0.000921659	0.00208644	0	0	0	0	0	0	0.00198544	0.0140924	0	0
k__Bacteria;p__Bacteroidetes;c__Bacteroidia;o__Bacteroidales;f__Porphyromonadaceae;g__Porphyromonas;s__multispecies_spp25_2	0	0	0	0	0	0	0	0.000514933	0	0	0	0	0	0	0	0	0	0	0	0	0	0	0	0	0	0	0	0	0	0	0	0	0.000563698	0	0
k__Bacteria;p__Bacteroidetes;c__Bacteroidia;o__Bacteroidales;f__Porphyromonadaceae;g__Porphyromonas;s__pasteri	0.0272232	0.0618375	0.00201939	0.0209854	0.0814947	0.104056	0.0385572	0.0278064	0.0542596	0.0576923	0	0.0613772	0	0.0169014	0.0350877	0.0876149	0	0.0441379	0.00238826	0.0195091	0.0219024	0.0393305	0.095613	0.00230415	0.00387481	0.000638978	0.0445931	0.0256864	0.00334129	0.0338144	0.039621	0	0.048478	0.0988616	0.0392457
k__Bacteria;p__Bacteroidetes;c__Bacteroidia;o__Bacteroidales;f__Porphyromonadaceae;g__Porphyromonas;s__sp._oral_taxon_275	0	0	0	0	0	0.000409668	0	0.000514933	0	0	0	0	0.00073046	0	0	0	0	0	0	0	0	0	0	0	0	0	0	0	0	0	0	0	0.000563698	0	0
k__Bacteria;p__Bacteroidetes;c__Bacteroidia;o__Bacteroidales;f__Porphyromonadaceae;g__Porphyromonas;s__sp._oral_taxon_277	0	0	0	0	0	0	0	0	0	0	0	0	0	0	0	0	0	0	0	0	0	0	0	0	0	0	0	0	0	0	0	0	0.000563698	0	0
k__Bacteria;p__Bacteroidetes;c__Bacteroidia;o__Bacteroidales;f__Porphyromonadaceae;g__Porphyromonas;s__sp._oral_taxon_278	0	0	0	0	0	0.00327735	0	0.000514933	0	0	0	0	0	0.00187793	0	0.00108167	0	0	0	0	0.00250313	0.0041841	0	0	0	0	0.000557414	0	0	0	0	0.00198544	0.00450958	0	0
k__Bacteria;p__Bacteroidetes;c__Bacteroidia;o__Bacteroidales;f__Porphyromonadaceae;g__Porphyromonas;s__sp._oral_taxon_285	0	0.00706714	0	0	0	0.000409668	0	0	0	0.000469043	0	0	0	0	0	0	0	0	0	0.00125865	0	0	0	0	0	0	0	0	0	0	0.000861326	0	0	0.00479329	0.000509684
k__Bacteria;p__Bacteroidetes;c__Bacteroidia;o__Bacteroidales;f__Porphyromonadaceae;g__Porphyromonas;s__sp._oral_taxon_930	0	0	0	0	0	0.001229	0	0	0	0	0	0	0	0	0	0	0	0	0	0	0	0	0	0	0	0	0	0	0	0	0	0	0	0	0
k__Bacteria;p__Bacteroidetes;c__Bacteroidia;o__Bacteroidales;f__Porphyromonadaceae;g__Tannerella;s__forsythia	0	0	0.000403877	0	0	0.000409668	0	0.0046344	0	0	0.00129702	0.00149701	0	0.000938967	0	0.000540833	0.000598444	0.00137931	0	0	0.00375469	0	0.00056243	0	0.000298063	0	0.00111483	0	0.00286396	0	0	0.000661813	0.00225479	0	0
k__Bacteria;p__Bacteroidetes;c__Bacteroidia;o__Bacteroidales;f__Porphyromonadaceae;g__Tannerella;s__sp._oral_taxon_286	0	0	0	0	0	0.000409668	0	0.0030896	0.0010142	0	0	0	0.00073046	0	0.00324886	0.0016225	0	0	0	0.00188798	0.000625782	0.00083682	0.00281215	0	0	0	0	0.00221435	0	0.000412371	0.000430663	0	0.000563698	0.000599161	0.000509684
k__Bacteria;p__Bacteroidetes;c__Bacteroidia;o__Bacteroidales;f__Porphyromonadaceae;g__Tannerella;s__sp._oral_taxon_808	0	0	0	0	0	0	0	0	0	0.000469043	0	0	0	0	0	0	0	0.000689655	0	0	0	0	0	0	0	0	0	0	0	0	0	0	0	0	0
k__Bacteria;p__Bacteroidetes;c__Bacteroidia;o__Bacteroidales;f__Prevotellaceae;g__Alloprevotella;s__rava	0	0	0	0.00182482	0	0	0	0.000514933	0	0	0	0	0.00073046	0	0.00779727	0	0	0	0.00784715	0.028949	0	0	0.00168729	0.000460829	0	0	0.000557414	0	0.000954654	0.000824742	0.000430663	0.00198544	0.000563698	0	0.00152905
k__Bacteria;p__Bacteroidetes;c__Bacteroidia;o__Bacteroidales;f__Prevotellaceae;g__Alloprevotella;s__sp._oral_taxon_308	0	0	0.000807754	0.0209854	0	0.000409668	0.00559701	0.000514933	0.000507099	0	0	0	0.00292184	0.0103286	0.0597791	0.00108167	0.0101735	0.00758621	0.00511771	0.027061	0	0.0100418	0	0.00138249	0.0023845	0.0760383	0.00724638	0.0234721	0.00143198	0.00618557	0.000430663	0.00132363	0	0	0.00866463
k__Bacteria;p__Bacteroidetes;c__Bacteroidia;o__Bacteroidales;f__Prevotellaceae;g__Alloprevotella;s__sp._oral_taxon_473	0	0	0	0.000456204	0.000355872	0.000409668	0	0	0.000507099	0.00515947	0	0.00449102	0	0.0150235	0	0.00216333	0	0	0	0.00755192	0.00375469	0	0.0151856	0	0.000596125	0	0	0	0.000477327	0.00494845	0.0129199	0	0	0.00179748	0.00152905
k__Bacteria;p__Bacteroidetes;c__Bacteroidia;o__Bacteroidales;f__Prevotellaceae;g__Alloprevotella;s__sp._oral_taxon_912	0	0.00176678	0	0	0	0	0	0.00102987	0	0	0	0	0.00146092	0	0	0	0	0	0	0	0	0	0	0	0	0	0.000557414	0.00044287	0.000477327	0	0	0	0	0	0
k__Bacteria;p__Bacteroidetes;c__Bacteroidia;o__Bacteroidales;f__Prevotellaceae;g__Alloprevotella;s__sp._oral_taxon_913	0	0	0	0	0	0.000409668	0	0	0	0	0	0	0	0	0	0.000540833	0	0	0	0	0	0.00083682	0	0	0	0	0	0	0	0.000412371	0	0	0	0	0
k__Bacteria;p__Bacteroidetes;c__Bacteroidia;o__Bacteroidales;f__Prevotellaceae;g__Alloprevotella;s__sp._oral_taxon_914	0	0.00176678	0	0.00228102	0.00391459	0.0155674	0	0.00514933	0	0.00984991	0	0.0179641	0	0.0056338	0	0.0248783	0	0	0	0.0094399	0	0.00083682	0.0241845	0.000921659	0	0	0.00501672	0.00044287	0.00143198	0.00247423	0.0155039	0	0	0.00659077	0.00917431
k__Bacteria;p__Bacteroidetes;c__Bacteroidia;o__Bacteroidales;f__Prevotellaceae;g__Alloprevotella;s__tannerae	0	0	0.000807754	0	0	0	0.00310945	0.00102987	0	0.00140713	0	0	0	0.000938967	0	0.0102758	0	0.00206897	0	0.0207678	0	0	0.00281215	0.000460829	0	0	0.00222965	0	0.0147971	0.00206186	0.00258398	0	0.000563698	0	0.0030581
k__Bacteria;p__Bacteroidetes;c__Bacteroidia;o__Bacteroidales;f__Prevotellaceae;g__Prevotella;s__aurantiaca	0.00544465	0.0318021	0	0	0.000711744	0.00409668	0	0	0	0.00187617	0	0.0209581	0	0	0	0	0	0.00137931	0	0.0100692	0	0	0	0	0	0	0	0	0	0.00123711	0.00172265	0	0.000563698	0.00119832	0.0198777
k__Bacteria;p__Bacteroidetes;c__Bacteroidia;o__Bacteroidales;f__Prevotellaceae;g__Prevotella;s__baroniae	0	0	0	0	0	0	0	0.0015448	0	0	0	0	0	0	0	0	0	0.000689655	0	0	0.000625782	0	0	0	0.00149031	0	0	0	0	0	0	0.00198544	0	0	0
k__Bacteria;p__Bacteroidetes;c__Bacteroidia;o__Bacteroidales;f__Prevotellaceae;g__Prevotella;s__denticola	0	0	0	0	0	0	0	0	0	0.000469043	0	0	0	0	0.000649773	0.000540833	0	0	0	0	0	0	0	0.000460829	0	0	0	0	0	0.00206186	0	0.000661813	0.000563698	0	0
k__Bacteria;p__Bacteroidetes;c__Bacteroidia;o__Bacteroidales;f__Prevotellaceae;g__Prevotella;s__histicola	0.0163339	0.00176678	0.26979	0.0383212	0	0	0.0261194	0.0195675	0	0	0.123865	0	0.186267	0	0.0565302	0.0216333	0.126272	0	0.0385534	0.000629327	0	0.00251046	0	0.024424	0.106706	0.0185304	0.0501672	0.135518	0.00811456	0	0.000430663	0.201191	0	0.00299581	0.000509684
k__Bacteria;p__Bacteroidetes;c__Bacteroidia;o__Bacteroidales;f__Prevotellaceae;g__Prevotella;s__intermedia	0	0.0388693	0	0	0	0	0	0.0164779	0.000507099	0	0.00129702	0.00149701	0.0102264	0.0028169	0	0.0102758	0	0.00551724	0.000682361	0.00125865	0	0	0.00224972	0	0	0.000638978	0.000557414	0.00132861	0	0	0.00129199	0.000661813	0.00394589	0	0
k__Bacteria;p__Bacteroidetes;c__Bacteroidia;o__Bacteroidales;f__Prevotellaceae;g__Prevotella;s__maculosa	0	0	0	0	0	0	0	0	0	0	0	0	0.00073046	0	0	0	0	0	0	0	0	0	0	0	0	0	0	0	0	0	0	0	0	0	0
k__Bacteria;p__Bacteroidetes;c__Bacteroidia;o__Bacteroidales;f__Prevotellaceae;g__Prevotella;s__marshii	0	0	0	0	0	0	0	0	0	0	0	0	0	0	0	0	0	0.000689655	0	0	0	0	0	0	0	0	0	0	0	0	0	0	0	0	0
k__Bacteria;p__Bacteroidetes;c__Bacteroidia;o__Bacteroidales;f__Prevotellaceae;g__Prevotella;s__melaninogenica	0.0798548	0.0530035	0.0876414	0.00319343	0.0088968	0.0245801	0.0659204	0.0447992	0.0020284	0.00469043	0.0713359	0.0329341	0.0277575	0.0516432	0.128005	0.0930233	0.102932	0.0462069	0.0917776	0.278792	0.00625782	0.0125523	0.0371204	0.000921659	0.263785	0.00191693	0.0434783	0.0978742	0.000954654	0.0498969	0.0159345	0.0615486	0.00169109	0.122828	0.0270133
k__Bacteria;p__Bacteroidetes;c__Bacteroidia;o__Bacteroidales;f__Prevotellaceae;g__Prevotella;s__micans	0	0	0	0	0	0	0.000621891	0.00205973	0	0	0	0	0.00073046	0	0	0	0	0	0	0	0.000625782	0	0	0	0	0	0	0	0	0.000412371	0	0	0	0	0
k__Bacteria;p__Bacteroidetes;c__Bacteroidia;o__Bacteroidales;f__Prevotellaceae;g__Prevotella;s__multisaccharivorax	0	0	0	0	0	0	0	0	0	0	0	0	0	0	0	0	0	0	0.00034118	0	0	0	0	0	0	0	0	0	0	0	0	0	0	0	0
k__Bacteria;p__Bacteroidetes;c__Bacteroidia;o__Bacteroidales;f__Prevotellaceae;g__Prevotella;s__multispecies_spp20_2	0	0	0.000403877	0	0	0	0	0.000514933	0	0	0	0	0	0	0	0	0.000598444	0	0.00102354	0	0	0	0	0	0	0	0	0	0	0	0	0	0	0	0
k__Bacteria;p__Bacteroidetes;c__Bacteroidia;o__Bacteroidales;f__Prevotellaceae;g__Prevotella;s__multispecies_spp21_4	0	0	0	0	0	0	0	0	0	0	0	0	0	0	0	0	0	0	0	0	0	0	0	0	0	0	0.000557414	0	0	0	0	0	0	0	0
k__Bacteria;p__Bacteroidetes;c__Bacteroidia;o__Bacteroidales;f__Prevotellaceae;g__Prevotella;s__multispecies_spp22_3	0	0	0.000403877	0	0	0	0	0	0	0	0.00583658	0	0	0	0	0	0	0	0	0	0	0	0.00112486	0	0	0	0	0.00088574	0	0	0	0	0	0	0
k__Bacteria;p__Bacteroidetes;c__Bacteroidia;o__Bacteroidales;f__Prevotellaceae;g__Prevotella;s__multispecies_spp37_3	0	0	0	0	0	0	0	0	0	0	0.000648508	0	0	0	0	0	0	0	0	0	0	0	0	0.000460829	0.000596125	0	0.000557414	0.00044287	0	0	0	0	0	0	0
k__Bacteria;p__Bacteroidetes;c__Bacteroidia;o__Bacteroidales;f__Prevotellaceae;g__Prevotella;s__multispecies_spp50_2	0.00181488	0	0.00121163	0.0109489	0	0	0.000621891	0.00669413	0	0	0.00453956	0	0	0	0.00844704	0	0	0.00137931	0.0191061	0	0	0	0	0.00322581	0.000894188	0.028115	0.0083612	0.00310009	0	0.00329897	0	0.000661813	0	0	0.00101937
k__Bacteria;p__Bacteroidetes;c__Bacteroidia;o__Bacteroidales;f__Prevotellaceae;g__Prevotella;s__multispecies_spp5_2	0.076225	0.0123675	0	0.00410584	0.0024911	0.00245801	0.000621891	0.00102987	0.0010142	0.00187617	0	0.00149701	0	0	0	0.00108167	0.000598444	0.000689655	0	0.000629327	0.000625782	0	0.00168729	0	0.000298063	0	0.000557414	0	0	0.000412371	0.00645995	0	0.000563698	0.00359497	0.000509684
k__Bacteria;p__Bacteroidetes;c__Bacteroidia;o__Bacteroidales;f__Prevotellaceae;g__Prevotella;s__nanceiensis	0.0816697	0.0212014	0.000403877	0.0323905	0.000355872	0.000819336	0.00186567	0.0092688	0	0.000938086	0.000648508	0.00299401	0	0.000938967	0.00324886	0.01298	0.0101735	0.00896552	0.00887069	0.0151038	0.00187735	0.00083682	0.00056243	0.00368664	0.00119225	0.0677316	0.00668896	0.00310009	0.00572792	0.0115464	0.000430663	0.000661813	0	0.0107849	0.00152905
k__Bacteria;p__Bacteroidetes;c__Bacteroidia;o__Bacteroidales;f__Prevotellaceae;g__Prevotella;s__nigrescens	0	0	0.00161551	0	0	0.000409668	0	0.000514933	0.000507099	0	0	0	0	0.000938967	0.00194932	0.00270416	0	0	0	0	0.00125156	0	0	0.000460829	0	0.00191693	0	0	0.00238663	0.000824742	0	0	0	0	0
k__Bacteria;p__Bacteroidetes;c__Bacteroidia;o__Bacteroidales;f__Prevotellaceae;g__Prevotella;s__oralis	0	0	0	0	0	0	0	0	0	0	0	0	0	0	0	0	0	0	0	0	0	0	0	0	0	0	0	0	0	0	0	0	0.000563698	0	0
k__Bacteria;p__Bacteroidetes;c__Bacteroidia;o__Bacteroidales;f__Prevotellaceae;g__Prevotella;s__oris	0	0.0159011	0.00282714	0	0	0	0.00124378	0.00411946	0.000507099	0.0032833	0.00129702	0.00149701	0.00219138	0.0150235	0.000649773	0.00216333	0	0.00137931	0	0.000629327	0	0	0	0	0	0.00127796	0.00167224	0	0.000954654	0.000824742	0	0.00794176	0.000563698	0	0
k__Bacteria;p__Bacteroidetes;c__Bacteroidia;o__Bacteroidales;f__Prevotellaceae;g__Prevotella;s__oulorum	0	0	0.00161551	0	0	0.000409668	0.00186567	0.00411946	0	0	0	0	0.00438276	0.00187793	0	0	0	0	0.000682361	0	0	0	0	0	0	0	0.000557414	0.00132861	0	0.00123711	0	0.00132363	0.00169109	0	0.000509684
k__Bacteria;p__Bacteroidetes;c__Bacteroidia;o__Bacteroidales;f__Prevotellaceae;g__Prevotella;s__pallens	0.00544465	0.00530035	0.0052504	0.0515511	0	0.000409668	0.00124378	0.0092688	0	0	0.0233463	0	0.00073046	0.0028169	0.0272904	0.00540833	0.000598444	0.000689655	0.0163767	0.00440529	0	0.00083682	0.00168729	0.00138249	0.0432191	0.00511182	0.0117057	0.0212578	0.00859189	0.0028866	0.000430663	0.00397088	0.000563698	0.00119832	0.00611621
k__Bacteria;p__Bacteroidetes;c__Bacteroidia;o__Bacteroidales;f__Prevotellaceae;g__Prevotella;s__pleuritidis	0	0	0	0	0	0	0.000621891	0	0	0	0	0	0	0	0	0	0	0.00137931	0	0	0	0	0	0	0	0	0	0.00088574	0.000477327	0.000412371	0	0	0.000563698	0	0
k__Bacteria;p__Bacteroidetes;c__Bacteroidia;o__Bacteroidales;f__Prevotellaceae;g__Prevotella;s__saccharolytica	0	0	0	0	0	0	0	0.000514933	0	0.000469043	0	0	0.00073046	0.000938967	0	0	0	0	0	0	0	0.00083682	0	0	0	0	0	0	0	0	0	0	0.000563698	0	0
k__Bacteria;p__Bacteroidetes;c__Bacteroidia;o__Bacteroidales;f__Prevotellaceae;g__Prevotella;s__salivae	0.00362976	0	0.0403877	0.0556569	0	0.000409668	0.00310945	0.00257467	0.000507099	0	0.0110246	0	0.00876552	0.0403756	0.0266407	0.00378583	0.000598444	0.00275862	0.0163767	0.0125865	0	0	0.00056243	0.0078341	0.0393443	0.0134185	0.0278707	0.00930027	0.00477327	0	0.000861326	0.0430179	0	0.000599161	0.00560652
k__Bacteria;p__Bacteroidetes;c__Bacteroidia;o__Bacteroidales;f__Prevotellaceae;g__Prevotella;s__scopos	0.00544465	0	0	0	0	0.000409668	0	0	0	0	0	0	0	0	0.00194932	0	0.00359066	0	0	0	0.000625782	0	0	0	0	0	0.00222965	0	0	0	0	0	0	0	0
k__Bacteria;p__Bacteroidetes;c__Bacteroidia;o__Bacteroidales;f__Prevotellaceae;g__Prevotella;s__shahii	0	0	0	0.000456204	0	0.00163867	0.000621891	0.000514933	0.0010142	0.00140713	0.000648508	0.00449102	0	0	0.00974659	0.00432666	0	0	0	0.000629327	0.00125156	0.00083682	0.00112486	0	0	0	0	0.00132861	0.000477327	0.00164948	0.000861326	0	0	0.00419413	0.00866463
k__Bacteria;p__Bacteroidetes;c__Bacteroidia;o__Bacteroidales;f__Prevotellaceae;g__Prevotella;s__sp._Oral_Taxon_299	0.00181488	0	0	0	0	0	0	0	0	0	0	0.00449102	0	0.00187793	0	0	0.00359066	0	0	0.00314663	0	0.00083682	0	0	0	0	0	0	0.000477327	0	0	0	0	0	0.00101937
k__Bacteria;p__Bacteroidetes;c__Bacteroidia;o__Bacteroidales;f__Prevotellaceae;g__Prevotella;s__sp._oral_taxon_292	0	0	0	0	0	0	0	0.000514933	0	0	0	0	0	0	0	0	0	0	0	0	0	0	0	0	0	0	0	0	0	0	0	0	0	0	0
k__Bacteria;p__Bacteroidetes;c__Bacteroidia;o__Bacteroidales;f__Prevotellaceae;g__Prevotella;s__sp._oral_taxon_300	0	0	0	0	0	0	0	0	0	0	0	0	0	0	0	0	0	0	0	0	0	0.00167364	0	0	0	0	0	0	0	0.000412371	0	0	0	0	0
k__Bacteria;p__Bacteroidetes;c__Bacteroidia;o__Bacteroidales;f__Prevotellaceae;g__Prevotella;s__sp._oral_taxon_304	0	0	0	0	0	0	0	0.0159629	0	0	0	0	0	0	0	0.00703083	0	0.00344828	0	0	0	0	0	0	0.00298063	0	0	0.00044287	0	0	0	0.00132363	0	0	0
k__Bacteria;p__Bacteroidetes;c__Bacteroidia;o__Bacteroidales;f__Prevotellaceae;g__Prevotella;s__sp._oral_taxon_305	0	0	0.00242326	0.000912409	0	0	0	0.000514933	0	0	0.00129702	0	0	0.000938967	0.00129955	0.000540833	0	0	0.00204708	0.00566394	0	0	0	0.000460829	0.00566319	0.00127796	0	0.00132861	0.000477327	0	0	0.00330907	0	0	0
k__Bacteria;p__Bacteroidetes;c__Bacteroidia;o__Bacteroidales;f__Prevotellaceae;g__Prevotella;s__sp._oral_taxon_306	0	0	0.0585622	0.0570255	0	0	0.0298507	0.00514933	0	0	0	0	0.00073046	0.0497653	0.000649773	0.003245	0	0	0.104742	0.00692259	0	0	0.00224972	0.0345622	0.0318927	0.241534	0.00947603	0.0150576	0.00429594	0	0	0.0397088	0	0.000599161	0.00917431
k__Bacteria;p__Bacteroidetes;c__Bacteroidia;o__Bacteroidales;f__Prevotellaceae;g__Prevotella;s__sp._oral_taxon_309	0.00181488	0	0.000403877	0.00182482	0	0	0.00186567	0	0	0	0.000648508	0	0	0	0.00324886	0.000540833	0	0	0.00102354	0.00377596	0	0	0	0.000921659	0.00149031	0	0	0.00974314	0.00190931	0	0	0.000661813	0	0.000599161	0
k__Bacteria;p__Bacteroidetes;c__Bacteroidia;o__Bacteroidales;f__Prevotellaceae;g__Prevotella;s__sp._oral_taxon_313	0.00544465	0	0.00323102	0.000456204	0	0	0	0	0	0	0.00129702	0	0	0	0.00129955	0.00108167	0	0	0.00409417	0.000629327	0	0	0	0	0.0137109	0.000638978	0.00222965	0.00531444	0	0	0	0.000661813	0	0	0.000509684
k__Bacteria;p__Bacteroidetes;c__Bacteroidia;o__Bacteroidales;f__Prevotellaceae;g__Prevotella;s__sp._oral_taxon_314	0.0217786	0	0.00363489	0.00136861	0.000711744	0	0.000621891	0.0149331	0	0	0.000648508	0	0.00073046	0.000938967	0.000649773	0.000540833	0	0.00896552	0.00136472	0	0.000625782	0	0	0	0.00864382	0.00255591	0.000557414	0.00044287	0	0	0	0.00529451	0.0011274	0	0.00356779
k__Bacteria;p__Bacteroidetes;c__Bacteroidia;o__Bacteroidales;f__Prevotellaceae;g__Prevotella;s__sp._oral_taxon_317	0	0	0	0	0	0	0	0.00257467	0	0.000938086	0	0	0	0.00187793	0	0.00108167	0	0.00206897	0	0	0.00125156	0.00083682	0	0	0	0	0.000557414	0	0.000477327	0.000412371	0	0	0.000563698	0	0
k__Bacteria;p__Bacteroidetes;c__Bacteroidia;o__Bacteroidales;f__Prevotellaceae;g__Prevotella;s__sp._oral_taxon_396	0	0	0	0.000456204	0	0.000409668	0	0.0015448	0	0	0	0	0	0	0.00129955	0.00108167	0	0	0	0	0	0	0	0	0	0	0	0	0	0	0	0	0	0	0
k__Bacteria;p__Bacteroidetes;c__Bacteroidia;o__Bacteroidales;f__Prevotellaceae;g__Prevotella;s__sp._oral_taxon_443	0	0	0	0	0	0	0	0	0	0	0	0	0	0	0.000649773	0.0048675	0	0.000689655	0	0.00503461	0	0	0	0	0	0	0	0	0	0	0.00129199	0.000661813	0	0.00119832	0.000509684
k__Bacteria;p__Bacteroidetes;c__Bacteroidia;o__Bacteroidales;f__Prevotellaceae;g__Prevotella;s__sp._oral_taxon_472	0	0	0	0	0	0.000409668	0	0	0.000507099	0	0	0	0.00219138	0	0	0	0	0	0	0	0	0.00083682	0	0	0	0	0	0	0	0	0	0	0.00169109	0	0
k__Bacteria;p__Bacteroidetes;c__Bacteroidia;o__Bacteroidales;f__Prevotellaceae;g__Prevotella;s__sp._oral_taxon_475	0	0	0	0	0	0	0	0	0.000507099	0	0	0	0	0	0	0	0	0	0	0	0	0	0	0	0	0	0	0	0	0	0.00559862	0	0	0	0
k__Bacteria;p__Bacteroidetes;c__Bacteroidia;o__Bacteroidales;f__Prevotellaceae;g__Prevotella;s__sp._oral_taxon_515	0	0	0	0	0	0	0	0	0	0	0	0	0	0	0	0	0	0.000689655	0	0	0	0	0	0	0	0	0	0	0	0	0	0	0	0	0
k__Bacteria;p__Bacteroidetes;c__Bacteroidia;o__Bacteroidales;f__Prevotellaceae;g__Prevotella;s__sp._oral_taxon_526	0	0	0	0	0	0	0	0.00102987	0	0	0	0	0	0	0	0	0	0	0.00034118	0.000629327	0	0	0	0	0.00149031	0	0	0	0	0	0	0	0	0	0
k__Bacteria;p__Bacteroidetes;c__Bacteroidia;o__Bacteroidales;f__Prevotellaceae;g__Prevotella;s__sp._oral_taxon_820	0	0	0	0	0	0	0	0	0	0	0	0	0	0	0	0	0	0	0	0	0	0	0	0	0	0	0	0	0.000477327	0	0	0	0	0	0
k__Bacteria;p__Bacteroidetes;c__Bacteroidia;o__Bacteroidales;f__Prevotellaceae;g__Prevotella;s__veroralis	0	0	0.00605816	0	0	0.001229	0.00248756	0.00514933	0	0.000469043	0.000648508	0	0	0	0	0	0.00299222	0.00275862	0.00272944	0	0	0	0	0.00230415	0.00119225	0.000638978	0.00111483	0.00132861	0	0	0	0.010589	0	0	0
k__Bacteria;p__Bacteroidetes;c__Flavobacteria;o__Flavobacteriales;f__Flavobacteriaceae;g__Capnocytophaga;s__sp._Oral_Taxon_A48	0	0	0	0	0.00960854	0.0249898	0.00124378	0	0	0	0	0	0	0	0	0	0	0	0	0	0.000625782	0	0	0	0	0	0	0	0	0	0	0	0	0	0
k__Bacteria;p__Bacteroidetes;c__Flavobacteriia;o__Flavobacteriales;f__Flavobacteriaceae;g__Bergeyella;s__sp._oral_taxon_322	0	0	0	0.000456204	0.0024911	0.000819336	0	0.0015448	0.0020284	0.00234522	0	0.00149701	0	0	0	0.000540833	0	0.000689655	0	0	0.00187735	0.0041841	0.00112486	0	0	0	0.00111483	0.00044287	0	0.00123711	0.00172265	0	0.00338219	0	0.000509684
k__Bacteria;p__Bacteroidetes;c__Flavobacteriia;o__Flavobacteriales;f__Flavobacteriaceae;g__Bergeyella;s__sp._oral_taxon_900	0	0	0	0	0	0	0	0	0	0	0	0	0.00073046	0	0	0	0	0	0	0	0	0	0	0	0	0	0	0.00044287	0	0	0	0	0	0.000599161	0
k__Bacteria;p__Bacteroidetes;c__Flavobacteriia;o__Flavobacteriales;f__Flavobacteriaceae;g__Bergeyella;s__sp._oral_taxon_907	0	0	0	0	0	0.000409668	0	0	0	0.000469043	0	0	0	0	0	0	0	0	0	0	0	0	0	0	0	0	0	0	0	0	0	0	0	0	0
k__Bacteria;p__Bacteroidetes;c__Flavobacteriia;o__Flavobacteriales;f__Flavobacteriaceae;g__Bergeyella;s__sp._oral_taxon_907_nov_97.42%	0	0	0	0	0	0	0	0	0	0.00187617	0	0	0	0	0	0	0	0	0	0	0	0	0	0	0	0	0	0	0	0	0	0	0	0	0
k__Bacteria;p__Bacteroidetes;c__Flavobacteriia;o__Flavobacteriales;f__Flavobacteriaceae;g__Capnocytophaga;s__gingivalis	0	0	0	0.000912409	0.0128114	0.000819336	0.00995025	0.000514933	0.00963489	0.00515947	0.000648508	0.00299401	0	0	0	0.003245	0	0.00965517	0.000682361	0.00125865	0.00250313	0.00251046	0.00168729	0	0	0	0.00167224	0	0.00334129	0.00247423	0.00172265	0.00198544	0.000563698	0.00239664	0.00866463
k__Bacteria;p__Bacteroidetes;c__Flavobacteriia;o__Flavobacteriales;f__Flavobacteriaceae;g__Capnocytophaga;s__granulosa	0	0	0	0	0.00427046	0.001229	0.00310945	0.007724	0.0025355	0.0182927	0	0.00299401	0.00803506	0.000938967	0	0.00378583	0.00119689	0.00689655	0.000682361	0.000629327	0.00375469	0.00167364	0	0	0.00178838	0	0.000557414	0	0	0	0.00861326	0.00860357	0.0011274	0.00119832	0.000509684
k__Bacteria;p__Bacteroidetes;c__Flavobacteriia;o__Flavobacteriales;f__Flavobacteriaceae;g__Capnocytophaga;s__haemolytica	0	0	0.000403877	0	0	0	0	0	0	0	0	0	0	0	0	0	0	0	0	0	0	0	0	0	0	0	0	0	0.000477327	0	0	0	0	0	0
k__Bacteria;p__Bacteroidetes;c__Flavobacteriia;o__Flavobacteriales;f__Flavobacteriaceae;g__Capnocytophaga;s__leadbetteri	0	0	0	0	0.0177936	0.00860303	0.00373134	0.00669413	0.0532454	0.00281426	0	0.010479	0.00219138	0.000938967	0.000649773	0.016225	0.00119689	0	0	0	0.00250313	0.00334728	0.00618673	0	0.00327869	0	0.00167224	0	0.00572792	0.00164948	0.00129199	0.00397088	0.00225479	0.00119832	0.0244648
k__Bacteria;p__Bacteroidetes;c__Flavobacteriia;o__Flavobacteriales;f__Flavobacteriaceae;g__Capnocytophaga;s__multispecies_sppn1_2_nov_96.35%	0	0	0	0	0	0.000819336	0	0	0.0010142	0	0	0	0	0	0	0	0	0	0	0	0	0	0	0	0	0	0	0	0	0	0	0	0	0	0
k__Bacteria;p__Bacteroidetes;c__Flavobacteriia;o__Flavobacteriales;f__Flavobacteriaceae;g__Capnocytophaga;s__ochracea	0	0	0	0	0	0	0	0	0	0	0	0	0	0	0	0	0	0	0	0	0	0.00251046	0	0	0	0.000638978	0	0	0	0	0	0	0	0	0
k__Bacteria;p__Bacteroidetes;c__Flavobacteriia;o__Flavobacteriales;f__Flavobacteriaceae;g__Capnocytophaga;s__sp._oral_taxon_323	0	0	0	0	0	0.000409668	0	0	0.000507099	0.0267355	0	0	0	0	0	0	0	0	0	0	0	0.00167364	0	0	0.000596125	0	0	0	0	0	0	0	0.00169109	0	0
k__Bacteria;p__Bacteroidetes;c__Flavobacteriia;o__Flavobacteriales;f__Flavobacteriaceae;g__Capnocytophaga;s__sp._oral_taxon_324	0	0	0	0	0	0	0	0	0	0	0	0	0.00073046	0	0	0	0	0	0	0	0	0	0	0	0	0	0	0	0	0	0	0.00595632	0	0	0
k__Bacteria;p__Bacteroidetes;c__Flavobacteriia;o__Flavobacteriales;f__Flavobacteriaceae;g__Capnocytophaga;s__sp._oral_taxon_326	0	0	0	0	0	0	0.00248756	0	0.0015213	0.00844278	0	0	0	0.000938967	0	0	0	0	0.000682361	0	0.00250313	0	0	0	0.000298063	0	0	0	0	0	0	0	0.000563698	0	0
k__Bacteria;p__Bacteroidetes;c__Flavobacteriia;o__Flavobacteriales;f__Flavobacteriaceae;g__Capnocytophaga;s__sp._oral_taxon_332	0	0	0	0	0	0.00204834	0	0.0015448	0.025355	0	0	0.00449102	0	0	0	0	0	0	0	0	0	0	0	0	0	0	0	0	0	0	0	0	0	0	0.00152905
k__Bacteria;p__Bacteroidetes;c__Flavobacteriia;o__Flavobacteriales;f__Flavobacteriaceae;g__Capnocytophaga;s__sp._oral_taxon_336	0	0	0	0	0	0	0	0.000514933	0	0	0	0.00149701	0	0	0	0.000540833	0	0	0	0	0	0	0	0	0	0	0	0	0	0	0	0.00264725	0.0011274	0	0
k__Bacteria;p__Bacteroidetes;c__Flavobacteriia;o__Flavobacteriales;f__Flavobacteriaceae;g__Capnocytophaga;s__sp._oral_taxon_380	0	0	0	0	0	0	0.00124378	0	0	0	0	0	0	0	0	0	0	0	0	0	0	0	0	0	0	0	0	0	0	0	0	0	0	0	0
k__Bacteria;p__Bacteroidetes;c__Flavobacteriia;o__Flavobacteriales;f__Flavobacteriaceae;g__Capnocytophaga;s__sp._oral_taxon_863	0	0	0	0	0	0.000409668	0	0.000514933	0.0010142	0	0	0	0.0116874	0	0	0	0	0	0	0	0.00125156	0	0	0	0	0	0.000557414	0	0	0	0	0	0	0	0.00152905
k__Bacteria;p__Bacteroidetes;c__Flavobacteriia;o__Flavobacteriales;f__Flavobacteriaceae;g__Capnocytophaga;s__sp._oral_taxon_864	0	0	0	0	0	0	0	0.000514933	0	0	0	0	0	0	0	0	0	0	0	0	0	0	0	0	0	0	0	0	0	0	0	0	0.000563698	0	0
k__Bacteria;p__Bacteroidetes;c__Flavobacteriia;o__Flavobacteriales;f__Flavobacteriaceae;g__Capnocytophaga;s__sp._oral_taxon_902	0	0	0	0	0	0	0	0.000514933	0	0.00515947	0	0	0	0	0	0	0	0	0	0	0.00125156	0	0	0	0	0	0	0	0	0	0	0.000661813	0	0	0
k__Bacteria;p__Bacteroidetes;c__Flavobacteriia;o__Flavobacteriales;f__Flavobacteriaceae;g__Capnocytophaga;s__sputigena	0	0	0.00121163	0.000456204	0.00213523	0.00655469	0.00559701	0.00978373	0.00912779	0.00187617	0	0.010479	0.00146092	0.00187793	0	0.00270416	0.000598444	0.00965517	0.000682361	0.000629327	0.00187735	0.00334728	0	0	0.000596125	0.000638978	0.00278707	0	0.0610979	0	0	0	0.00563698	0	0.00407747
k__Bacteria;p__Chloroflexi;c__Anaerolineae;o__Anaerolineales;f__Anaerolineaceae;g__Anaerolineae_[G-1];s__sp._oral_taxon_439	0	0	0	0	0	0	0	0	0	0	0	0	0	0	0	0	0	0	0	0	0	0	0	0	0	0	0	0	0	0	0	0	0.000563698	0	0
k__Bacteria;p__Firmicutes;c__Bacilli;o__Bacillales;f__Gemellaceae;g__Gemella;s__morbillorum	0	0	0	0	0	0.000409668	0	0	0	0	0	0	0.00073046	0	0	0	0	0	0	0	0.000625782	0	0	0	0	0	0	0	0	0	0	0	0	0	0
k__Bacteria;p__Firmicutes;c__Bacilli;o__Bacillales;f__Gemellaceae;g__Gemella;s__multispecies_spp51_2	0	0.00176678	0	0.000456204	0.00106762	0.00204834	0	0.00205973	0.0010142	0.000938086	0	0	0.00073046	0.000938967	0	0.000540833	0.000598444	0	0.00682361	0.000629327	0.00250313	0.00334728	0.00731159	0.00276498	0	0	0.00222965	0.00044287	0	0	0.00947459	0.00132363	0.00676437	0.00119832	0
k__Bacteria;p__Firmicutes;c__Bacilli;o__Bacillales;f__Gemellaceae;g__Gemella;s__sanguinis	0	0.00530035	0.000807754	0	0	0.001229	0.00621891	0.00669413	0.0035497	0.00187617	0.00389105	0.00898204	0.00073046	0.00375587	0.00324886	0.00432666	0.000598444	0.00206897	0.0034118	0.00125865	0.00750939	0.00251046	0.0191226	0	0.00387481	0.0166134	0.000557414	0.00575731	0.254415	0.000824742	0.0116279	0.00264725	0.00281849	0.0125824	0.00152905
k__Bacteria;p__Firmicutes;c__Bacilli;o__Bacillales;f__NA;g__Gemella;s__parahaemolysans	0	0	0	0	0.000355872	0.000819336	0	0	0	0	0	0	0.00073046	0	0	0	0	0	0	0	0	0	0	0	0	0	0.00501672	0	0	0.000824742	0.00645995	0.000661813	0	0	0
k__Bacteria;p__Firmicutes;c__Bacilli;o__Bacillales;f__Staphylococcaceae;g__Gemella;s__multispecies_spp14_2	0	0	0	0	0	0	0	0.000514933	0	0	0	0	0	0	0	0	0	0	0	0	0	0	0	0	0	0	0.000557414	0	0	0	0	0	0	0	0
k__Bacteria;p__Firmicutes;c__Bacilli;o__Bacillales;f__Staphylococcaceae;g__Staphylococcus;s__sciuri	0	0	0	0	0	0	0	0	0	0	0	0	0	0	0	0	0	0	0	0.000629327	0	0	0	0	0	0	0	0	0	0	0	0	0	0	0
k__Bacteria;p__Firmicutes;c__Bacilli;o__Lactobacillales;f__Aerococcaceae;g__Abiotrophia;s__defectiva	0	0	0	0.00273723	0.00177936	0.00204834	0	0.00205973	0.000507099	0.000469043	0	0	0	0.00187793	0	0	0	0.00551724	0.00102354	0	0.00500626	0.0276151	0	0	0	0	0.00668896	0	0	0.000412371	0	0	0.000563698	0	0
k__Bacteria;p__Firmicutes;c__Bacilli;o__Lactobacillales;f__Carnobacteriaceae;g__Granulicatella;s__elegans	0	0	0	0	0.00106762	0.00532569	0	0.0015448	0	0	0	0	0	0.00187793	0	0	0	0	0	0	0.00750939	0.00167364	0	0.00184332	0	0	0.000557414	0	0	0	0	0	0.035513	0.00239664	0
k__Bacteria;p__Firmicutes;c__Bacilli;o__Lactobacillales;f__Carnobacteriaceae;g__Granulicatella;s__multispecies_spp49_2	0	0.00176678	0.00121163	0.000912409	0.00427046	0.00327735	0.000621891	0.0046344	0.0025355	0.0065666	0	0.00149701	0.00438276	0.0103286	0.00324886	0.0016225	0.0125673	0.00896552	0.00545889	0.00125865	0.00876095	0.0167364	0.00337458	0.00138249	0.00208644	0.00830671	0.00334448	0.00752879	0.0310263	0.00494845	0.0111972	0	0.00338219	0.00359497	0.00356779
k__Bacteria;p__Firmicutes;c__Bacilli;o__Lactobacillales;f__Lactobacillaceae;g__Lactobacillus;s__delbrueckii	0	0	0	0	0	0	0	0.000514933	0	0	0	0	0	0	0	0	0	0	0	0	0	0	0	0	0	0	0	0	0	0	0	0	0	0	0
k__Bacteria;p__Firmicutes;c__Bacilli;o__Lactobacillales;f__Lactobacillaceae;g__Lactobacillus;s__fermentum	0	0	0	0	0	0	0	0	0	0	0	0	0	0	0	0	0.0173549	0	0	0	0	0	0	0	0	0	0	0	0	0	0	0	0	0	0
k__Bacteria;p__Firmicutes;c__Bacilli;o__Lactobacillales;f__Lactobacillaceae;g__Lactobacillus;s__gasseri	0	0	0	0	0	0	0	0	0	0	0	0	0.00073046	0	0	0	0	0	0	0	0	0	0	0	0	0	0.00111483	0	0	0	0	0	0	0	0
k__Bacteria;p__Firmicutes;c__Bacilli;o__Lactobacillales;f__Lactobacillaceae;g__Lactobacillus;s__iners	0	0	0	0	0	0	0	0	0	0	0	0	0	0	0	0	0	0	0	0	0	0	0	0	0	0	0	0	0	0.000412371	0	0	0	0	0
k__Bacteria;p__Firmicutes;c__Bacilli;o__Lactobacillales;f__Lactobacillaceae;g__Lactobacillus;s__kitasatonis	0	0	0	0	0	0	0	0	0	0	0	0	0	0	0	0	0.000598444	0	0	0	0	0	0	0	0	0	0	0	0	0	0	0	0	0	0
k__Bacteria;p__Firmicutes;c__Bacilli;o__Lactobacillales;f__Lactobacillaceae;g__Lactobacillus;s__vaginalis	0	0	0	0	0	0	0	0	0	0	0	0	0.00073046	0	0	0	0	0	0	0	0	0	0	0	0	0	0	0	0	0	0	0	0	0	0
k__Bacteria;p__Firmicutes;c__Bacilli;o__Lactobacillales;f__Streptococcaceae;g__Lactococcus;s__lactis	0	0	0	0	0	0	0	0	0	0	0	0	0	0	0	0	0	0	0	0	0	0	0	0	0	0	0	0	0	0	0	0	0	0	0
k__Bacteria;p__Firmicutes;c__Bacilli;o__Lactobacillales;f__Streptococcaceae;g__Streptococcus;s__anginosus	0	0	0.000807754	0	0	0	0	0.000514933	0	0	0	0	0.00438276	0	0	0	0	0	0	0.000629327	0	0	0	0	0.000298063	0	0	0	0	0	0	0.00330907	0.0011274	0	0.000509684
k__Bacteria;p__Firmicutes;c__Bacilli;o__Lactobacillales;f__Streptococcaceae;g__Streptococcus;s__cristatus	0.00544465	0.0282686	0.000807754	0	0.000355872	0.00204834	0.00808458	0.007724	0.0010142	0.00891182	0.000648508	0	0.0160701	0.0178404	0.00259909	0.00973499	0.000598444	0.00482759	0.00511771	0.00440529	0.00563204	0.01841	0.00393701	0.00645161	0.000894188	0.000638978	0.0128205	0.00310009	0.00190931	0.00247423	0.000861326	0.00463269	0.0281849	0.000599161	0.00152905
k__Bacteria;p__Firmicutes;c__Bacilli;o__Lactobacillales;f__Streptococcaceae;g__Streptococcus;s__gordonii	0.00181488	0	0	0.00364964	0.000355872	0.000819336	0.00310945	0.00720906	0	0.000469043	0.000648508	0.00149701	0.0036523	0.0028169	0	0.00270416	0.00478755	0.0124138	0.0017059	0	0	0.00167364	0.00224972	0.00230415	0.000894188	0	0.00167224	0.00088574	0.0214797	0.000412371	0.000430663	0.00264725	0.00225479	0	0
k__Bacteria;p__Firmicutes;c__Bacilli;o__Lactobacillales;f__Streptococcaceae;g__Streptococcus;s__intermedius	0	0	0	0	0	0.000409668	0.00497512	0	0.000507099	0.000938086	0.000648508	0	0.00146092	0.00469484	0	0.00216333	0.00359066	0.000689655	0.00034118	0	0	0.00167364	0.00056243	0	0	0.00191693	0	0.00044287	0	0	0	0.000661813	0.00169109	0	0
k__Bacteria;p__Firmicutes;c__Bacilli;o__Lactobacillales;f__Streptococcaceae;g__Streptococcus;s__lactarius	0	0.0106007	0	0.00136861	0.00569395	0	0.00746269	0.00102987	0.000507099	0.00234522	0.00194553	0.00149701	0	0.00469484	0	0.00270416	0	0	0.00034118	0.00566394	0.00625782	0.0133891	0.00224972	0.00506912	0.000596125	0	0.00111483	0.00088574	0	0.00123711	0	0	0.00225479	0.00179748	0.00152905
k__Bacteria;p__Firmicutes;c__Bacilli;o__Lactobacillales;f__Streptococcaceae;g__Streptococcus;s__multispecies_spp12_3	0.00181488	0	0.000403877	0	0	0	0.000621891	0.0030896	0.0025355	0	0	0.00149701	0.00438276	0.000938967	0.00259909	0	0.000598444	0	0.00409417	0.000629327	0	0.00083682	0.00281215	0.000921659	0	0	0.000557414	0.00177148	0.00286396	0	0.00129199	0.00397088	0	0.00179748	0
k__Bacteria;p__Firmicutes;c__Bacilli;o__Lactobacillales;f__Streptococcaceae;g__Streptococcus;s__multispecies_spp15_2	0.00181488	0.00353357	0	0	0	0	0	0	0	0.000469043	0	0	0	0	0	0	0	0	0.000682361	0	0	0	0	0.000460829	0	0	0	0.00132861	0	0.000412371	0	0	0	0	0
k__Bacteria;p__Firmicutes;c__Bacilli;o__Lactobacillales;f__Streptococcaceae;g__Streptococcus;s__multispecies_spp17_2	0	0	0	0.000912409	0	0	0.000621891	0	0	0	0.00129702	0	0.00584368	0	0.000649773	0	0	0	0.00034118	0	0	0	0.00674916	0	0	0.00255591	0.00445931	0.00265722	0	0.000412371	0	0	0	0	0
k__Bacteria;p__Firmicutes;c__Bacilli;o__Lactobacillales;f__Streptococcaceae;g__Streptococcus;s__multispecies_spp1_2	0.00544465	0.00353357	0.0246365	0.00410584	0.000711744	0.000409668	0.000621891	0.00257467	0.0015213	0	0.00453956	0	0.0116874	0.00375587	0	0.0048675	0.0155595	0.00206897	0.0300239	0.00566394	0.00375469	0.00083682	0.00618673	0.00691244	0.00447094	0.0153355	0.0111483	0.00398583	0.0200477	0.00618557	0.00172265	0.0145599	0.0011274	0.00239664	0.00356779
k__Bacteria;p__Firmicutes;c__Bacilli;o__Lactobacillales;f__Streptococcaceae;g__Streptococcus;s__multispecies_spp23_15	0	0.00176678	0	0	0	0	0	0	0	0	0	0	0	0	0	0	0	0	0.00034118	0	0	0.00083682	0	0	0	0	0	0	0	0	0.00129199	0	0	0	0
k__Bacteria;p__Firmicutes;c__Bacilli;o__Lactobacillales;f__Streptococcaceae;g__Streptococcus;s__multispecies_spp24_14	0.0344828	0.0777385	0.00363489	0.024635	0.0316726	0.0221221	0.0329602	0.0422245	0.0329615	0.0351782	0.00648508	0.0299401	0.00803506	0.0920188	0.0155945	0.0313683	0.00418911	0.00965517	0.0388946	0.0258024	0.0450563	0.178243	0.048369	0.0410138	0.00655738	0.00319489	0.06466	0.0221435	0.0711217	0.0375258	0.0611542	0.0238253	0.0546787	0.0353505	0.00611621
k__Bacteria;p__Firmicutes;c__Bacilli;o__Lactobacillales;f__Streptococcaceae;g__Streptococcus;s__multispecies_spp2_4	0	0	0	0	0	0	0	0	0	0	0	0	0	0	0	0	0.000598444	0	0	0	0	0	0	0	0	0	0	0.00044287	0	0	0	0	0	0	0
k__Bacteria;p__Firmicutes;c__Bacilli;o__Lactobacillales;f__Streptococcaceae;g__Streptococcus;s__multispecies_spp32_2	0.00181488	0.00530035	0.00201939	0.000912409	0	0	0.00559701	0.000514933	0.0010142	0.000469043	0	0.00149701	0.00438276	0.0028169	0.00584795	0.00432666	0.000598444	0.000689655	0.00409417	0.00251731	0.000625782	0.0108787	0.0472441	0.00599078	0.00149031	0.00127796	0.00334448	0.00177148	0.000954654	0.00164948	0.0129199	0.00132363	0	0.00119832	0
k__Bacteria;p__Firmicutes;c__Bacilli;o__Lactobacillales;f__Streptococcaceae;g__Streptococcus;s__multispecies_spp33_2	0.00181488	0.00353357	0.000403877	0.00182482	0.000711744	0	0.00435323	0.00360453	0.0015213	0.000469043	0	0.00149701	0.00146092	0.00375587	0	0.00270416	0	0.00551724	0.00307062	0.000629327	0.000625782	0.0108787	0.0174353	0.00322581	0.000298063	0.00191693	0.00167224	0	0	0.00164948	0.000861326	0.00198544	0.00225479	0	0
k__Bacteria;p__Firmicutes;c__Bacilli;o__Lactobacillales;f__Streptococcaceae;g__Streptococcus;s__multispecies_spp40_2	0	0.00353357	0.000807754	0.000912409	0	0	0	0.0015448	0.000507099	0	0.00324254	0	0.00292184	0	0.000649773	0	0.00837822	0	0.00511771	0.000629327	0.000625782	0	0.0101237	0.00414747	0.00208644	0.0166134	0.000557414	0.00620018	0.0109785	0.00206186	0	0.00264725	0	0	0
k__Bacteria;p__Firmicutes;c__Bacilli;o__Lactobacillales;f__Streptococcaceae;g__Streptococcus;s__multispecies_spp41_3	0	0.00176678	0	0.000456204	0.000355872	0.00245801	0.00497512	0.00102987	0.00507099	0.00187617	0.000648508	0	0	0.00375587	0	0.00432666	0	0.000689655	0	0.000629327	0.00125156	0.00251046	0.0101237	0.00230415	0	0	0	0	0.000954654	0.00206186	0.00732127	0	0.00169109	0.00479329	0
k__Bacteria;p__Firmicutes;c__Bacilli;o__Lactobacillales;f__Streptococcaceae;g__Streptococcus;s__mutans	0	0	0	0	0	0	0	0.000514933	0	0	0	0	0.00219138	0	0	0	0	0	0	0	0	0	0	0	0	0	0	0	0	0	0	0	0	0	0
k__Bacteria;p__Firmicutes;c__Bacilli;o__Lactobacillales;f__Streptococcaceae;g__Streptococcus;s__peroris	0	0	0	0	0	0	0	0	0	0	0	0	0.00146092	0	0	0	0	0	0	0	0	0.00083682	0.00056243	0	0	0	0.00222965	0.00088574	0	0.000412371	0.000430663	0.000661813	0	0	0
k__Bacteria;p__Firmicutes;c__Bacilli;o__Lactobacillales;f__Streptococcaceae;g__Streptococcus;s__salivarius	0	0	0.000403877	0	0	0	0	0	0	0	0	0	0	0	0	0	0.000598444	0	0	0	0	0	0	0	0	0	0	0	0	0	0	0.000661813	0	0	0
k__Bacteria;p__Firmicutes;c__Bacilli;o__Lactobacillales;f__Streptococcaceae;g__Streptococcus;s__sanguinis	0	0.00353357	0.00201939	0.00729927	0.00106762	0	0.00808458	0.00257467	0.0020284	0.000938086	0.000648508	0.00299401	0.00219138	0.0103286	0	0.00216333	0	0.0158621	0.00136472	0.000629327	0	0.0251046	0.0129359	0.00829493	0.000298063	0.00766773	0.00334448	0	0.000477327	0.00206186	0.000861326	0.00132363	0.00507328	0.000599161	0
k__Bacteria;p__Firmicutes;c__Bacilli;o__Lactobacillales;f__Streptococcaceae;g__Streptococcus;s__sinensis	0.00181488	0.00530035	0	0	0.000355872	0.000409668	0.000621891	0.000514933	0.000507099	0	0.000648508	0	0	0	0	0	0	0	0	0.000629327	0	0	0	0.000460829	0	0	0	0	0	0	0	0	0.000563698	0	0
k__Bacteria;p__Firmicutes;c__Bacilli;o__Lactobacillales;f__Streptococcaceae;g__Streptococcus;s__sobrinus	0	0	0	0	0	0	0	0	0	0	0	0	0	0	0	0	0	0	0.000682361	0	0	0	0	0	0	0	0	0	0	0	0	0	0	0	0
k__Bacteria;p__Firmicutes;c__Bacilli;o__Lactobacillales;f__Streptococcaceae;g__Streptococcus;s__sp._oral_taxon_056	0	0.00176678	0	0	0.00177936	0.001229	0.00124378	0.00102987	0	0	0	0	0.00146092	0.000938967	0	0	0	0.00206897	0	0	0.00125156	0	0	0	0	0.000638978	0.00222965	0	0.000954654	0	0	0.00198544	0.0011274	0	0
k__Bacteria;p__Firmicutes;c__Bacilli;o__Lactobacillales;f__Streptococcaceae;g__Streptococcus;s__thermophilus	0	0	0.000403877	0	0	0	0	0.000514933	0	0	0	0	0	0	0	0	0.00119689	0	0	0	0	0	0	0.000460829	0	0.000638978	0	0.00044287	0	0	0	0.000661813	0	0	0
k__Bacteria;p__Firmicutes;c__Bacilli;o__Lactobacillales;f__Streptococcaceae;g__Streptococcus;s__vestibularis	0	0	0.000403877	0	0	0	0	0	0	0	0	0	0	0	0	0	0	0	0	0	0	0	0	0	0	0	0	0	0	0	0	0	0	0	0
k__Bacteria;p__Firmicutes;c__Clostridia;o__Clostridiales;f__Clostridiales Family XIII. Incertae Sedis;g__NA;s__infirmum	0	0	0	0	0	0	0	0	0	0	0	0	0	0	0	0	0	0	0	0.000629327	0	0	0	0	0	0	0	0	0	0	0	0	0	0	0
k__Bacteria;p__Firmicutes;c__Clostridia;o__Clostridiales;f__Clostridiales_[F-1];g__Clostridiales_[F-1][G-1];s__sp._oral_taxon_093	0	0	0	0	0	0	0	0.0015448	0	0	0	0	0	0	0	0.000540833	0	0	0	0	0	0	0	0	0	0	0	0	0	0	0	0	0	0	0
k__Bacteria;p__Firmicutes;c__Clostridia;o__Clostridiales;f__Clostridiales_[F];g__Clostridiales_[G];s__sp._Oral_Taxon_G74	0	0	0	0	0	0	0	0.00205973	0	0	0	0	0	0	0	0	0	0	0	0	0	0	0	0	0	0	0	0	0	0	0	0	0	0	0
k__Bacteria;p__Firmicutes;c__Clostridia;o__Clostridiales;f__Eubacteriaceae_[XV];g__Pseudoramibacter;s__alactolyticus	0	0	0	0	0	0	0	0	0	0	0	0	0	0	0	0.000540833	0	0	0	0	0	0	0	0	0	0	0	0	0	0	0	0	0.000563698	0	0
k__Bacteria;p__Firmicutes;c__Clostridia;o__Clostridiales;f__Lachnospiraceae[14];g__Catonella;s__sp._Oral_Taxon_B06	0	0	0	0	0	0	0.000621891	0	0	0	0	0	0	0	0	0	0	0	0	0	0	0	0	0	0	0	0	0	0	0	0	0	0	0	0
k__Bacteria;p__Firmicutes;c__Clostridia;o__Clostridiales;f__Lachnospiraceae_[XIV];g__Butyrivibrio;s__sp._oral_taxon_080	0	0	0	0	0	0	0	0	0	0	0	0	0	0	0	0	0	0	0	0	0	0	0	0	0	0	0	0	0	0	0	0	0.000563698	0	0
k__Bacteria;p__Firmicutes;c__Clostridia;o__Clostridiales;f__Lachnospiraceae_[XIV];g__Butyrivibrio;s__sp._oral_taxon_455	0	0	0	0.00182482	0	0	0	0	0	0	0.00324254	0	0	0.000938967	0.00389864	0	0	0	0.00307062	0.00629327	0	0.00167364	0	0.000460829	0.00119225	0	0	0.00664305	0	0	0	0.00397088	0	0	0
k__Bacteria;p__Firmicutes;c__Clostridia;o__Clostridiales;f__Lachnospiraceae_[XIV];g__Catonella;s__morbi	0	0	0	0.00228102	0.000355872	0	0.00435323	0.00102987	0.000507099	0.000469043	0.00259403	0	0	0	0.00129955	0	0	0	0	0.000629327	0.00125156	0.00167364	0.00787402	0	0.000298063	0	0.00334448	0.00044287	0	0.0210309	0.000430663	0	0	0.00359497	0.00509684
k__Bacteria;p__Firmicutes;c__Clostridia;o__Clostridiales;f__Lachnospiraceae_[XIV];g__Catonella;s__sp._oral_taxon_451	0	0	0	0	0	0	0	0.000514933	0	0	0	0	0	0	0	0	0	0	0	0	0	0	0	0	0	0	0	0	0.000954654	0	0	0.00132363	0	0	0
k__Bacteria;p__Firmicutes;c__Clostridia;o__Clostridiales;f__Lachnospiraceae_[XIV];g__Johnsonella;s__ignava	0	0	0	0	0	0	0	0	0	0	0	0	0	0	0	0	0	0	0	0	0.000625782	0	0	0	0	0	0	0	0	0	0	0.000661813	0	0	0
k__Bacteria;p__Firmicutes;c__Clostridia;o__Clostridiales;f__Lachnospiraceae_[XIV];g__Johnsonella;s__sp._oral_taxon_166	0	0	0	0	0	0	0	0.0015448	0	0	0	0	0	0	0.000649773	0	0	0.000689655	0	0	0.000625782	0	0	0	0	0	0	0	0.000954654	0	0	0	0.0011274	0	0
k__Bacteria;p__Firmicutes;c__Clostridia;o__Clostridiales;f__Lachnospiraceae_[XIV];g__Lachnoanaerobaculum;s__orale	0.00181488	0	0.000403877	0.000456204	0	0.000409668	0.00124378	0	0	0	0.00453956	0	0.00146092	0.000938967	0.00259909	0.00216333	0	0	0.0017059	0.00440529	0	0	0	0.00322581	0.00149031	0.0313099	0.0195095	0.00354296	0.00381862	0	0	0.00661813	0	0	0.0142712
k__Bacteria;p__Firmicutes;c__Clostridia;o__Clostridiales;f__Lachnospiraceae_[XIV];g__Lachnoanaerobaculum;s__saburreum	0	0	0	0	0	0	0	0	0	0	0	0	0.00073046	0	0	0	0	0	0.00034118	0	0	0	0	0	0	0	0	0	0	0	0	0	0	0	0
k__Bacteria;p__Firmicutes;c__Clostridia;o__Clostridiales;f__Lachnospiraceae_[XIV];g__Lachnoanaerobaculum;s__umeaense	0	0.00706714	0	0	0.00177936	0.00245801	0.00248756	0.00205973	0.000507099	0.00187617	0.000648508	0.00149701	0	0.000938967	0.00779727	0.00594916	0	0.000689655	0.000682361	0.00251731	0.000625782	0	0.00674916	0.000460829	0	0.00638978	0.00222965	0.00088574	0	0.00206186	0.00775194	0	0.0011274	0.0179748	0.0132518
k__Bacteria;p__Firmicutes;c__Clostridia;o__Clostridiales;f__Lachnospiraceae_[XIV];g__Lachnospiraceae_[G-2];s__sp._oral_taxon_096	0	0	0	0	0	0	0.000621891	0	0	0	0.000648508	0	0	0	0	0	0	0.000689655	0.00272944	0.00440529	0	0	0	0.00875576	0	0	0	0	0.00477327	0.000824742	0	0	0	0	0
k__Bacteria;p__Firmicutes;c__Clostridia;o__Clostridiales;f__Lachnospiraceae_[XIV];g__Lachnospiraceae_[G-3];s__sp._oral_taxon_100	0	0.00176678	0	0	0	0	0.000621891	0.00102987	0	0	0	0	0.00292184	0	0	0.00216333	0	0	0	0	0	0	0.00168729	0	0	0	0	0	0.000477327	0	0.000861326	0	0.000563698	0	0.0203874
k__Bacteria;p__Firmicutes;c__Clostridia;o__Clostridiales;f__Lachnospiraceae_[XIV];g__Lachnospiraceae_[G-8];s__sp._oral_taxon_500	0	0	0	0	0	0.000409668	0	0.00102987	0	0	0	0	0	0	0	0	0	0	0.000682361	0	0	0	0	0	0	0	0	0	0.00143198	0	0.000430663	0.000661813	0.000563698	0.000599161	0.000509684
k__Bacteria;p__Firmicutes;c__Clostridia;o__Clostridiales;f__Lachnospiraceae_[XIV];g__Oribacterium;s__asaccharolyticum	0.00362976	0	0.000403877	0.000912409	0	0	0.00870647	0	0	0	0.00453956	0	0.00073046	0.000938967	0.00649773	0.0016225	0	0	0.00034118	0.00125865	0.000625782	0	0.00112486	0.00322581	0.00178838	0.0223642	0.00557414	0.00088574	0.00334129	0.00123711	0	0.00860357	0	0.000599161	0.00101937
k__Bacteria;p__Firmicutes;c__Clostridia;o__Clostridiales;f__Lachnospiraceae_[XIV];g__Oribacterium;s__parvum	0	0.00176678	0	0.00182482	0.000355872	0	0.00310945	0.0015448	0	0.000469043	0.00129702	0	0	0	0.00324886	0.00594916	0	0.000689655	0	0.00314663	0	0.00083682	0.00168729	0	0	0	0.00445931	0.00265722	0	0.00123711	0.00172265	0	0	0.00539245	0.0142712
k__Bacteria;p__Firmicutes;c__Clostridia;o__Clostridiales;f__Lachnospiraceae_[XIV];g__Oribacterium;s__sinus	0	0.00530035	0.000807754	0.000912409	0	0.00204834	0.0360697	0.0061792	0.0015213	0	0.00518807	0.00299401	0.00584368	0	0.000649773	0.0102758	0	0	0.00477653	0.00188798	0.00312891	0.00083682	0.0101237	0.00276498	0.00149031	0	0.0139353	0.00265722	0.000954654	0.11134	0.00129199	0.000661813	0.0011274	0.00659077	0.020897
k__Bacteria;p__Firmicutes;c__Clostridia;o__Clostridiales;f__Lachnospiraceae_[XIV];g__Shuttleworthia;s__satelles	0	0	0	0	0	0	0	0	0	0	0.000648508	0	0	0	0	0	0	0	0	0	0	0.00083682	0	0	0	0	0	0	0	0	0	0	0	0	0
k__Bacteria;p__Firmicutes;c__Clostridia;o__Clostridiales;f__Lachnospiraceae_[XIV];g__Stomatobaculum;s__longum	0	0	0.000807754	0.000456204	0	0	0	0	0	0	0.00194553	0	0.00292184	0.000938967	0.00129955	0	0	0	0.00102354	0	0	0	0	0.000921659	0.000596125	0.0115016	0.00167224	0	0.00190931	0	0	0	0	0	0
k__Bacteria;p__Firmicutes;c__Clostridia;o__Clostridiales;f__Lachnospiraceae_[XIV];g__Stomatobaculum;s__sp._oral_taxon_097	0.00362976	0.00176678	0.000403877	0.000456204	0	0	0.00870647	0.000514933	0.000507099	0	0.00713359	0	0	0.000938967	0.00649773	0.00757166	0	0	0	0.00188798	0	0.00167364	0.0129359	0	0.000894188	0	0.0117057	0.00398583	0	0.00494845	0.000861326	0	0	0.00419413	0.00407747
k__Bacteria;p__Firmicutes;c__Clostridia;o__Clostridiales;f__Lachnospiraceae_[XIVa];g__Lachnospiraceae_[G];s__sp._Oral_Taxon_B32	0	0	0	0	0	0.000409668	0	0	0.000507099	0	0	0	0.00657414	0	0	0	0	0	0	0	0	0	0	0	0	0	0	0	0	0	0	0	0	0	0
k__Bacteria;p__Firmicutes;c__Clostridia;o__Clostridiales;f__Peptococcaceae;g__Peptococcus;s__sp._oral_taxon_167	0	0	0	0	0	0	0	0	0	0	0	0	0	0	0	0	0	0	0.00034118	0	0	0	0	0	0	0	0	0	0.00143198	0	0	0.000661813	0.0011274	0	0
k__Bacteria;p__Firmicutes;c__Clostridia;o__Clostridiales;f__Peptococcaceae;g__Peptococcus;s__sp._oral_taxon_168	0	0.00176678	0	0	0	0.000409668	0.000621891	0	0	0	0	0.00149701	0	0	0	0	0	0	0	0.000629327	0	0	0	0	0	0	0	0	0	0.000412371	0	0	0	0.00119832	0.00152905
k__Bacteria;p__Firmicutes;c__Clostridia;o__Clostridiales;f__Peptoniphilaceae;g__Parvimonas;s__micra	0	0	0.000403877	0	0	0	0.00186567	0.0061792	0	0.00140713	0.00129702	0	0	0.00375587	0	0.003245	0	0.00344828	0	0	0	0	0	0	0	0.00127796	0.000557414	0.00044287	0.00286396	0.000412371	0	0.00264725	0	0.000599161	0
k__Bacteria;p__Firmicutes;c__Clostridia;o__Clostridiales;f__Peptoniphilaceae;g__Parvimonas;s__multispecies_spp19_2	0	0	0	0	0	0	0	0.00102987	0	0	0	0	0	0	0	0.000540833	0	0	0	0	0.00125156	0	0	0	0	0	0	0	0	0.00164948	0.000430663	0	0.000563698	0.00299581	0.000509684
k__Bacteria;p__Firmicutes;c__Clostridia;o__Clostridiales;f__Peptoniphilaceae;g__Peptoniphilaceae_[G-1];s__sp._oral_taxon_113	0	0	0	0	0	0	0.000621891	0	0	0	0.00324254	0	0	0	0	0	0	0	0	0	0	0	0	0	0	0	0	0	0	0	0	0	0	0	0
k__Bacteria;p__Firmicutes;c__Clostridia;o__Clostridiales;f__Peptostreptococcaceae_[XI];g__Filifactor;s__alocis	0.00181488	0.00176678	0.000403877	0	0	0	0.000621891	0.015448	0	0	0.00194553	0.00149701	0	0	0	0.0118983	0.000598444	0.00137931	0.00034118	0	0.00125156	0	0	0	0.000298063	0	0.000557414	0.00044287	0.00238663	0	0.000861326	0.00198544	0.00225479	0	0
k__Bacteria;p__Firmicutes;c__Clostridia;o__Clostridiales;f__Peptostreptococcaceae_[XI];g__Mogibacterium;s__timidum	0	0	0	0	0	0	0	0	0	0	0	0.00149701	0	0.000938967	0	0.00108167	0	0	0	0	0	0	0	0	0	0	0	0	0	0	0	0	0	0.000599161	0
k__Bacteria;p__Firmicutes;c__Clostridia;o__Clostridiales;f__Peptostreptococcaceae_[XI];g__Peptostreptococcaceae_[XI][G-1];s__[Eubacterium]_infirmum	0.00181488	0	0	0	0	0	0	0	0	0	0	0	0	0	0	0	0	0	0	0	0	0	0	0	0	0	0	0	0	0	0	0	0	0	0
k__Bacteria;p__Firmicutes;c__Clostridia;o__Clostridiales;f__Peptostreptococcaceae_[XI];g__Peptostreptococcaceae_[XI][G-1];s__sp._oral_taxon_383	0	0	0	0	0	0	0	0	0	0	0	0	0	0	0	0	0	0	0	0	0	0	0	0	0	0	0	0	0.000477327	0	0	0	0	0	0
k__Bacteria;p__Firmicutes;c__Clostridia;o__Clostridiales;f__Peptostreptococcaceae_[XI];g__Peptostreptococcaceae_[XI][G-2];s__sp._oral_taxon_091	0	0	0	0.000456204	0	0	0.000621891	0	0	0	0	0	0	0	0	0	0	0	0	0	0	0	0	0	0	0	0	0	0	0	0	0	0	0	0
k__Bacteria;p__Firmicutes;c__Clostridia;o__Clostridiales;f__Peptostreptococcaceae_[XI];g__Peptostreptococcaceae_[XI][G-4];s__sp._oral_taxon_369	0	0	0	0	0	0	0	0.0015448	0	0	0	0	0	0	0	0	0	0	0.00034118	0	0	0	0	0	0	0	0	0	0.000477327	0	0	0.000661813	0	0	0
k__Bacteria;p__Firmicutes;c__Clostridia;o__Clostridiales;f__Peptostreptococcaceae_[XI];g__Peptostreptococcaceae_[XI][G-5];s__[Eubacterium]_saphenum	0	0	0	0	0	0	0	0.0159629	0	0	0	0	0	0	0	0	0	0	0	0	0	0	0	0	0	0	0	0	0	0	0	0	0.0011274	0.000599161	0
k__Bacteria;p__Firmicutes;c__Clostridia;o__Clostridiales;f__Peptostreptococcaceae_[XI];g__Peptostreptococcaceae_[XI][G-5];s__sp._oral_taxon_493	0	0.00353357	0	0	0.00106762	0.000409668	0.00186567	0	0	0	0	0.00149701	0	0	0	0	0	0	0	0	0	0	0	0	0	0	0	0	0	0.00206186	0	0	0.000563698	0.000599161	0.00254842
k__Bacteria;p__Firmicutes;c__Clostridia;o__Clostridiales;f__Peptostreptococcaceae_[XI];g__Peptostreptococcaceae_[XI][G-6];s__[Eubacterium]_nodatum	0	0	0	0	0	0	0	0.0015448	0	0	0.000648508	0	0	0	0	0.000540833	0	0	0	0	0	0	0	0	0	0	0	0	0.000477327	0	0	0	0	0	0
k__Bacteria;p__Firmicutes;c__Clostridia;o__Clostridiales;f__Peptostreptococcaceae_[XI];g__Peptostreptococcaceae_[XI][G-7];s__sp._oral_taxon_081	0	0	0	0	0	0	0	0.000514933	0	0	0	0	0	0	0	0	0	0	0	0	0	0	0	0	0	0	0	0	0	0	0	0	0	0	0
k__Bacteria;p__Firmicutes;c__Clostridia;o__Clostridiales;f__Peptostreptococcaceae_[XI];g__Peptostreptococcaceae_[XI][G-7];s__sp._oral_taxon_922	0	0	0	0	0.000711744	0	0.000621891	0.000514933	0	0.000469043	0	0.00149701	0	0	0	0	0	0.000689655	0	0	0.000625782	0	0.00112486	0	0	0	0	0	0	0	0	0	0.000563698	0.00179748	0.00254842
k__Bacteria;p__Firmicutes;c__Clostridia;o__Clostridiales;f__Peptostreptococcaceae_[XI];g__Peptostreptococcaceae_[XI][G-9];s__[Eubacterium]_brachy	0	0	0	0	0	0	0.000621891	0.00257467	0	0.000469043	0	0	0	0	0	0.000540833	0	0	0.00034118	0	0	0	0	0	0	0	0	0	0.000954654	0	0	0.000661813	0	0	0
k__Bacteria;p__Firmicutes;c__Clostridia;o__Clostridiales;f__Peptostreptococcaceae_[XI];g__Peptostreptococcus;s__stomatis	0.0217786	0.0141343	0	0.00182482	0	0.000409668	0.00186567	0.007724	0	0.000938086	0.000648508	0	0.00073046	0.00469484	0.00259909	0.00594916	0	0.000689655	0	0.00125865	0	0	0.00281215	0	0.000596125	0	0	0	0.000477327	0.00123711	0	0	0.000563698	0.0365488	0.00560652
k__Bacteria;p__Firmicutes;c__Clostridia;o__Clostridiales;f__Ruminococcaceae;g__Ruminococcaceae_[G-1];s__sp._oral_taxon_075	0	0	0.000403877	0	0.000711744	0.000819336	0.00124378	0.00566426	0	0.00140713	0	0.00149701	0.00073046	0	0.0162443	0.00540833	0	0.000689655	0.0017059	0.00377596	0.000625782	0.00083682	0	0.000921659	0	0	0.00111483	0	0	0	0.000430663	0.000661813	0.00225479	0.00179748	0.00203874
k__Bacteria;p__Firmicutes;c__Clostridia;o__Clostridiales;f__Ruminococcaceae;g__Ruminococcaceae_[G-2];s__sp._oral_taxon_085	0	0	0.000403877	0.00136861	0	0	0.000621891	0.0015448	0	0	0	0	0	0.0028169	0.0175439	0.003245	0	0	0.00409417	0.00692259	0	0	0	0.000921659	0.000596125	0	0.00278707	0.00265722	0	0.00123711	0	0.000661813	0.0011274	0.00119832	0.00101937
k__Bacteria;p__Firmicutes;c__Clostridia;o__Clostridiales;f__Veillonellaceae;g__Centipeda;s__sp._Oral_Taxon_B01	0	0	0	0	0	0	0	0	0	0	0	0	0	0	0	0	0	0.000689655	0	0	0	0	0	0	0	0	0	0	0	0	0	0.000661813	0	0	0
k__Bacteria;p__Firmicutes;c__Clostridia;o__Clostridiales;f__Veillonellaceae;g__Mitsuokella;s__sp._Oral_Taxon_G68	0	0	0	0	0	0	0	0	0	0	0	0	0	0	0	0	0	0	0	0	0	0	0	0	0	0	0	0	0	0	0	0.000661813	0	0	0
k__Bacteria;p__Firmicutes;c__Clostridia;o__Clostridiales;f__Veillonellaceae;g__Selenomonas;s__sp._Oral_Taxon_G55	0	0	0	0	0	0	0	0	0	0	0	0	0	0	0	0	0	0	0	0	0	0	0	0	0	0	0	0	0	0	0	0.00198544	0	0	0
k__Bacteria;p__Firmicutes;c__Clostridia;o__Clostridiales;f__Veillonellaceae;g__Selenomonas;s__sp._Oral_Taxon_G67	0	0	0.000403877	0	0	0	0	0	0	0	0	0	0	0	0	0	0	0	0	0	0	0	0	0	0	0	0	0	0	0	0	0	0	0	0
k__Bacteria;p__Firmicutes;c__Clostridia;o__Clostridiales;f__Veillonellaceae;g__Selenomonas;s__sp._Oral_Taxon_H63	0	0	0	0	0	0	0	0	0	0	0	0	0	0	0	0.00108167	0	0	0	0	0	0	0	0	0	0	0	0	0	0	0	0	0	0	0
k__Bacteria;p__Firmicutes;c__Clostridia;o__Clostridiales;f__multifamily;g__multigenus;s__multispecies_spp4_2	0.00181488	0.00353357	0	0.000456204	0	0	0	0.00102987	0	0.000469043	0.00129702	0	0	0	0	0	0	0	0	0	0	0	0	0	0	0.000638978	0	0.00044287	0.000477327	0	0	0	0	0.00419413	0
k__Bacteria;p__Firmicutes;c__Clostridia;o__Clostridiales;f__multifamily;g__multigenus;s__multispecies_sppn1_2_nov_96.21%	0	0	0	0	0	0	0	0	0	0	0	0	0	0	0	0	0	0	0	0	0	0	0.00056243	0	0	0	0	0	0	0.000412371	0	0	0	0	0
k__Bacteria;p__Firmicutes;c__Erysipelotrichia;o__Erysipelotrichales;f__Erysipelotrichaceae;g__Bulleidia;s__extructa	0	0	0	0	0	0	0	0	0	0	0	0	0	0	0	0.0016225	0	0	0	0	0	0	0	0	0	0	0	0	0	0	0	0	0	0	0
k__Bacteria;p__Firmicutes;c__Erysipelotrichia;o__Erysipelotrichales;f__Erysipelotrichaceae;g__Eggerthia;s__catenaformis	0	0	0	0	0	0	0	0	0	0	0	0	0	0.000938967	0	0.000540833	0	0	0	0	0	0	0	0	0	0	0	0	0	0	0	0	0	0	0
k__Bacteria;p__Firmicutes;c__Erysipelotrichia;o__Erysipelotrichales;f__Erysipelotrichaceae;g__Erysipelotrichaceae_[G-1];s__sp._oral_taxon_905	0	0	0	0	0	0	0	0	0	0	0	0	0	0	0	0	0	0.000689655	0	0	0	0	0	0	0	0	0	0	0	0	0	0	0	0	0
k__Bacteria;p__Firmicutes;c__Erysipelotrichia;o__Erysipelotrichales;f__Erysipelotrichaceae;g__Solobacterium;s__moorei	0	0	0.000403877	0	0	0	0	0	0	0	0	0	0	0	0	0	0	0	0	0.000629327	0	0	0	0	0	0	0.00111483	0	0	0	0	0	0	0.000599161	0
k__Bacteria;p__Firmicutes;c__Mollicutes;o__Mollicutes_[O-2];f__Mollicutes_[F-2];g__Mollicutes_[G-2];s__sp._oral_taxon_906	0	0	0	0	0	0	0	0.00102987	0	0	0	0	0	0	0	0	0	0	0	0	0	0	0	0	0	0	0	0	0	0	0	0	0	0	0
k__Bacteria;p__Firmicutes;c__Mollicutes;o__Mycoplasmatales;f__Mycoplasmataceae;g__Mycoplasma;s__faucium	0	0	0	0	0	0	0	0.00102987	0	0	0	0	0	0.000938967	0	0	0	0	0	0	0	0	0	0	0	0	0	0	0.00143198	0	0	0	0	0	0
k__Bacteria;p__Firmicutes;c__Mollicutes;o__Mycoplasmatales;f__Mycoplasmataceae;g__Mycoplasma;s__orale	0	0	0	0	0	0	0	0	0	0	0	0	0	0	0	0	0	0	0	0	0	0	0	0	0	0	0	0	0	0.000412371	0	0	0	0	0
k__Bacteria;p__Firmicutes;c__Mollicutes;o__Mycoplasmatales;f__Mycoplasmataceae;g__Mycoplasma;s__salivarium	0	0	0	0	0	0	0	0	0	0	0	0	0	0	0	0.0016225	0	0	0	0	0	0	0	0	0	0	0	0	0	0	0	0	0	0	0
k__Bacteria;p__Firmicutes;c__Negativicutes;o__Selenomonadales;f__Sporomusaceae;g__multigenus;s__multispecies_sppn1_2_nov_87.50%	0	0	0	0	0	0	0	0	0	0	0.000648508	0	0	0	0	0	0	0	0	0	0	0	0	0	0	0	0	0	0	0	0	0	0	0	0.000509684
k__Bacteria;p__Firmicutes;c__Negativicutes;o__Selenomonadales;f__Veillonellaceae;g__Anaeroglobus;s__geminatus	0	0.00176678	0	0	0	0	0	0.000514933	0	0	0	0	0	0	0	0	0	0	0	0	0.000625782	0	0	0.000460829	0	0.000638978	0	0	0	0.000412371	0	0	0	0	0.000509684
k__Bacteria;p__Firmicutes;c__Negativicutes;o__Selenomonadales;f__Veillonellaceae;g__Centipeda;s__periodontii	0	0	0	0	0	0	0	0.00205973	0	0	0.000648508	0	0.00073046	0	0	0	0	0	0	0	0	0.00083682	0	0	0.000298063	0	0	0	0	0	0	0.000661813	0	0	0
k__Bacteria;p__Firmicutes;c__Negativicutes;o__Selenomonadales;f__Veillonellaceae;g__Dialister;s__invisus	0	0	0.000403877	0	0	0	0.000621891	0.00102987	0	0	0.00129702	0.00149701	0	0	0	0	0	0.000689655	0	0.000629327	0	0.00083682	0	0	0	0	0.000557414	0	0	0.00123711	0	0.000661813	0.000563698	0.000599161	0
k__Bacteria;p__Firmicutes;c__Negativicutes;o__Selenomonadales;f__Veillonellaceae;g__Dialister;s__pneumosintes	0	0	0.000403877	0	0	0	0	0.0015448	0	0	0	0	0	0	0	0.000540833	0	0	0	0	0	0	0	0	0	0	0	0.00044287	0	0.000412371	0	0	0	0	0
k__Bacteria;p__Firmicutes;c__Negativicutes;o__Selenomonadales;f__Veillonellaceae;g__Megasphaera;s__micronuciformis	0	0	0.0254443	0.0123175	0	0	0.00373134	0.000514933	0	0.000469043	0.0505837	0	0.0569759	0.0112676	0.0545809	0.00594916	0	0.00275862	0.0136472	0.0339836	0	0	0.00393701	0.00460829	0.0396423	0.0396166	0.0535117	0.0584588	0.000477327	0.014433	0.000430663	0.0238253	0	0.00359497	0
k__Bacteria;p__Firmicutes;c__Negativicutes;o__Selenomonadales;f__Veillonellaceae;g__Mitsuokella;s__sp._oral_taxon_131	0	0	0	0	0	0	0	0	0	0	0	0	0	0	0	0	0	0	0	0	0	0	0	0	0	0	0.000557414	0	0	0	0	0	0	0	0
k__Bacteria;p__Firmicutes;c__Negativicutes;o__Selenomonadales;f__Veillonellaceae;g__Selenomonas;s__artemidis	0	0.00176678	0.000807754	0	0	0	0	0.00102987	0	0.000469043	0.000648508	0	0	0.0028169	0	0	0	0	0.000682361	0	0	0	0	0	0	0	0.00334448	0	0	0	0	0	0	0	0
k__Bacteria;p__Firmicutes;c__Negativicutes;o__Selenomonadales;f__Veillonellaceae;g__Selenomonas;s__dianae	0	0	0	0	0	0.000819336	0	0.00102987	0	0	0	0	0	0	0	0	0	0.00275862	0	0	0	0	0	0	0	0	0	0	0	0	0	0.00198544	0	0	0
k__Bacteria;p__Firmicutes;c__Negativicutes;o__Selenomonadales;f__Veillonellaceae;g__Selenomonas;s__flueggei	0.00181488	0	0.000403877	0	0	0	0	0	0	0	0	0	0	0	0	0.000540833	0	0	0	0	0	0	0	0	0	0	0	0	0	0	0	0	0	0	0
k__Bacteria;p__Firmicutes;c__Negativicutes;o__Selenomonadales;f__Veillonellaceae;g__Selenomonas;s__multispecies_spp34_3	0	0	0	0	0	0	0	0.00102987	0	0	0	0	0	0	0	0	0	0	0	0	0	0	0	0	0	0	0	0	0	0	0	0	0	0	0
k__Bacteria;p__Firmicutes;c__Negativicutes;o__Selenomonadales;f__Veillonellaceae;g__Selenomonas;s__multispecies_spp3_2	0.00181488	0	0	0.000456204	0	0	0	0	0	0	0.00453956	0	0	0	0.00129955	0.000540833	0	0.000689655	0.0017059	0.00566394	0	0	0.00056243	0	0	0	0.000557414	0	0.00668258	0.000412371	0	0.000661813	0	0	0.00203874
k__Bacteria;p__Firmicutes;c__Negativicutes;o__Selenomonadales;f__Veillonellaceae;g__Selenomonas;s__noxia	0	0.00176678	0.00403877	0	0	0	0.000621891	0.00875386	0	0.000469043	0	0	0.00073046	0	0.00129955	0	0	0.00206897	0.00034118	0	0	0.00083682	0	0	0.000596125	0	0.00222965	0	0	0.00123711	0	0.00595632	0	0.00359497	0
k__Bacteria;p__Firmicutes;c__Negativicutes;o__Selenomonadales;f__Veillonellaceae;g__Selenomonas;s__sp._oral_taxon_126	0	0	0	0	0	0.000409668	0	0.000514933	0	0	0	0	0.00073046	0	0	0.00270416	0	0.000689655	0	0	0	0	0	0	0	0	0	0.00044287	0	0	0	0.00132363	0.000563698	0	0
k__Bacteria;p__Firmicutes;c__Negativicutes;o__Selenomonadales;f__Veillonellaceae;g__Selenomonas;s__sp._oral_taxon_134	0	0	0	0	0	0	0	0.00102987	0	0	0	0	0	0	0	0	0	0.00137931	0	0	0	0	0	0	0	0	0	0	0	0	0	0.000661813	0	0	0
k__Bacteria;p__Firmicutes;c__Negativicutes;o__Selenomonadales;f__Veillonellaceae;g__Selenomonas;s__sp._oral_taxon_136	0	0	0.00282714	0	0	0	0.000621891	0	0	0	0.0330739	0	0.00146092	0	0.00259909	0.00216333	0	0.000689655	0.00409417	0.00251731	0	0	0.00056243	0	0	0	0	0	0.00238663	0.00123711	0	0.00330907	0	0.000599161	0
k__Bacteria;p__Firmicutes;c__Negativicutes;o__Selenomonadales;f__Veillonellaceae;g__Selenomonas;s__sp._oral_taxon_137	0	0	0	0	0	0	0	0.000514933	0	0	0	0	0.00219138	0	0	0	0	0	0.00204708	0	0	0	0	0.000460829	0	0	0	0	0	0.000824742	0	0.00132363	0	0	0
k__Bacteria;p__Firmicutes;c__Negativicutes;o__Selenomonadales;f__Veillonellaceae;g__Selenomonas;s__sp._oral_taxon_146	0	0	0	0	0	0	0	0.000514933	0	0	0	0	0.00146092	0	0	0	0	0	0	0	0	0	0	0	0	0	0	0	0	0	0	0	0	0	0
k__Bacteria;p__Firmicutes;c__Negativicutes;o__Selenomonadales;f__Veillonellaceae;g__Selenomonas;s__sp._oral_taxon_149	0	0	0.000403877	0	0	0	0	0	0	0	0	0	0	0	0	0	0	0.000689655	0	0	0	0	0	0	0	0	0	0	0	0	0	0	0	0.000599161	0
k__Bacteria;p__Firmicutes;c__Negativicutes;o__Selenomonadales;f__Veillonellaceae;g__Selenomonas;s__sp._oral_taxon_478	0.00181488	0	0	0.00319343	0	0	0	0	0	0	0	0	0	0.000938967	0	0.00216333	0	0	0.000682361	0.0125865	0	0	0	0	0	0	0	0	0	0.00164948	0	0	0	0.000599161	0
k__Bacteria;p__Firmicutes;c__Negativicutes;o__Selenomonadales;f__Veillonellaceae;g__Selenomonas;s__sp._oral_taxon_919	0	0	0	0	0	0.000409668	0	0.00102987	0	0	0	0	0.00219138	0	0	0	0	0	0	0	0	0	0	0	0	0	0	0	0	0	0	0	0	0	0
k__Bacteria;p__Firmicutes;c__Negativicutes;o__Selenomonadales;f__Veillonellaceae;g__Selenomonas;s__sp._oral_taxon_920	0	0	0	0	0	0	0	0.000514933	0	0	0	0	0	0	0	0	0	0	0	0	0	0	0	0	0	0	0	0	0	0	0	0	0	0	0
k__Bacteria;p__Firmicutes;c__Negativicutes;o__Selenomonadales;f__Veillonellaceae;g__Selenomonas;s__sputigena	0	0	0.000403877	0	0	0	0.00186567	0.0061792	0	0.000469043	0.00389105	0.00149701	0.00219138	0	0	0.00703083	0	0.00413793	0.00034118	0.00314663	0	0	0.00056243	0	0	0	0.00167224	0	0	0.000412371	0	0.00198544	0.0011274	0.000599161	0
k__Bacteria;p__Firmicutes;c__Negativicutes;o__Selenomonadales;f__Veillonellaceae;g__Veillonella;s__atypica	0.00181488	0	0.0452342	0.0296533	0.000355872	0	0.00497512	0.000514933	0	0	0.0907912	0	0.0394449	0.0150235	0.0201429	0.0113575	0.0394973	0.02	0.00580007	0.0157332	0	0.00753138	0	0.0101382	0.0345753	0.0178914	0.0568562	0.0659876	0.000954654	0.00206186	0	0.0277962	0	0.00299581	0.000509684
k__Bacteria;p__Firmicutes;c__Negativicutes;o__Selenomonadales;f__Veillonellaceae;g__Veillonella;s__denticariosi	0	0	0	0	0	0	0	0	0	0	0	0	0	0	0	0	0	0	0.00034118	0	0	0	0	0	0	0	0	0	0	0	0	0	0	0	0
k__Bacteria;p__Firmicutes;c__Negativicutes;o__Selenomonadales;f__Veillonellaceae;g__Veillonella;s__dispar	0	0	0.00161551	0	0	0	0.000621891	0	0	0	0.00129702	0	0.00146092	0	0.000649773	0	0.00179533	0	0	0.000629327	0	0	0	0	0.000596125	0.00127796	0	0.00044287	0	0	0	0	0	0	0
k__Bacteria;p__Firmicutes;c__Negativicutes;o__Selenomonadales;f__Veillonellaceae;g__Veillonella;s__multispecies_spp27_2	0.0181488	0.00883392	0	0	0.000711744	0.000819336	0	0.0015448	0.0030426	0	0.000648508	0.00449102	0	0.00187793	0.000649773	0	0	0	0.00034118	0.00881057	0	0.00167364	0.0292463	0	0.000596125	0.000638978	0	0.00044287	0	0.0057732	0.00215332	0.000661813	0	0.00539245	0.00815494
k__Bacteria;p__Firmicutes;c__Negativicutes;o__Selenomonadales;f__Veillonellaceae;g__Veillonella;s__multispecies_spp28_3	0	0	0	0	0	0	0	0	0	0	0	0	0	0	0	0	0	0	0	0.000629327	0	0	0	0	0.000298063	0	0	0	0	0	0	0	0	0	0
k__Bacteria;p__Firmicutes;c__Negativicutes;o__Selenomonadales;f__Veillonellaceae;g__Veillonella;s__multispecies_spp29_2	0.00725953	0.00176678	0.0545234	0.00501825	0	0.000819336	0.00186567	0.0092688	0	0	0.0415045	0.00149701	0.0562454	0.00657277	0.0246914	0.00432666	0.0137642	0.0124138	0.0634596	0.00818125	0	0.00083682	0.00056243	0.00599078	0.023845	0.0817891	0.0462653	0.0535872	0.00381862	0.0437113	0	0.017869	0	0.014979	0
k__Bacteria;p__Firmicutes;c__Negativicutes;o__Selenomonadales;f__Veillonellaceae;g__Veillonella;s__multispecies_spp30_2	0	0.0106007	0	0.000456204	0	0	0	0	0	0	0	0.00149701	0	0	0.00194932	0	0	0.00137931	0	0	0	0	0	0	0	0	0	0	0	0	0	0	0	0.00119832	0.000509684
k__Bacteria;p__Firmicutes;c__Negativicutes;o__Selenomonadales;f__Veillonellaceae;g__Veillonella;s__parvula	0.0145191	0.0706714	0.00565428	0.0374088	0.0142349	0.0315444	0.00808458	0.0432544	0.00709939	0.0103189	0.00389105	0.0943114	0.00803506	0.0225352	0.0129955	0.0221741	0.0718133	0.0627586	0.00443535	0.0251731	0.0312891	0.0251046	0.00674916	0.00322581	0.0125186	0.05623	0.0412486	0.00487157	0	0.017732	0.00947459	0.00132363	0.0146561	0.0563212	0.0356779
k__Bacteria;p__Firmicutes;c__Negativicutes;o__Selenomonadales;f__Veillonellaceae;g__Veillonella;s__rogosae	0.0181488	0.0583039	0.00121163	0.0273723	0.00427046	0	0.0155473	0.0139032	0.0192698	0.0131332	0.00713359	0.0718563	0	0.00469484	0.00454841	0.0135208	0.0682226	0.0158621	0.00034118	0.0333543	0.000625782	0.00167364	0.0151856	0.00138249	0.0157973	0	0.0100334	0.00354296	0	0.0329897	0.00904393	0	0.00225479	0.0701019	0.0423038
k__Bacteria;p__Firmicutes;c__Negativicutes;o__Selenomonadales;f__Veillonellaceae;g__Veillonella;s__sp._oral_taxon_780	0	0	0	0	0	0	0	0	0	0	0	0	0.00073046	0.0028169	0	0	0	0	0	0.000629327	0.00187735	0	0	0	0.00178838	0	0	0	0	0.000412371	0	0	0	0	0.000509684
k__Bacteria;p__Firmicutes;c__Negativicutes;o__Selenomonadales;f__Veillonellaceae;g__Veillonella;s__sp._oral_taxon_917	0	0	0.0496769	0	0	0	0	0	0	0.000469043	0.0415045	0	0	0	0	0	0	0	0.0293415	0	0	0	0	0	0.000596125	0	0	0.00620018	0	0.000412371	0.000430663	0.0099272	0	0	0
k__Bacteria;p__Firmicutes;c__Negativicutes;o__Selenomonadales;f__Veillonellaceae;g__Veillonellaceae_[G-1];s__sp._oral_taxon_129	0	0	0	0	0	0	0	0.000514933	0	0	0	0	0	0	0	0	0	0	0	0	0	0	0	0	0	0	0	0	0	0	0	0	0	0	0
k__Bacteria;p__Firmicutes;c__Negativicutes;o__Selenomonadales;f__Veillonellaceae;g__Veillonellaceae_[G-1];s__sp._oral_taxon_145	0	0	0	0	0	0	0	0.00102987	0	0	0	0	0	0	0	0	0	0	0	0	0	0	0	0	0	0	0	0	0	0	0	0	0	0	0
k__Bacteria;p__Firmicutes;c__Negativicutes;o__Selenomonadales;f__Veillonellaceae;g__Veillonellaceae_[G-1];s__sp._oral_taxon_155	0	0	0	0	0	0	0	0.0015448	0	0	0	0	0	0	0	0	0	0.000689655	0	0	0	0	0	0	0	0	0.000557414	0	0.000477327	0	0	0	0	0	0
k__Bacteria;p__Firmicutes;c__Negativicutes;o__Selenomonadales;f__Veillonellaceae;g__Veillonellaceae_[G-1];s__sp._oral_taxon_483	0	0	0	0	0	0	0	0	0	0	0	0	0	0	0	0	0	0.00137931	0	0	0	0	0	0	0	0	0	0	0	0	0	0	0	0	0
k__Bacteria;p__Fusobacteria;c__Fusobacteria;o__Fusobacteria_[O];f__Fusobacteria_[F];g__Fusobacteria_[G-1];s__sp._Oral_Taxon_A71	0	0	0	0	0	0	0	0	0	0	0	0	0	0	0.00194932	0	0	0.0110345	0	0	0	0	0	0	0.000894188	0	0	0.00132861	0	0	0	0	0	0	0
k__Bacteria;p__Fusobacteria;c__Fusobacteria;o__Fusobacteriales;f__Fusobacteriaceae;g__Fusobacterium;s__nucleatum_ss_animalis	0	0	0	0	0.000355872	0	0	0	0	0	0.000648508	0	0	0	0	0	0	0.000689655	0	0.000629327	0	0.00251046	0	0	0	0	0.00167224	0	0.000477327	0	0.000430663	0.000661813	0.00281849	0.00119832	0
k__Bacteria;p__Fusobacteria;c__Fusobacteria;o__Fusobacteriales;f__Leptotrichiaceae;g__Leptotrichia;s__sp._Oral_Taxon_B57	0	0	0	0	0	0	0	0.0030896	0	0	0	0.00149701	0	0	0	0	0	0.00137931	0	0	0	0	0	0	0	0	0	0	0	0	0	0.000661813	0	0	0
k__Bacteria;p__Fusobacteria;c__Fusobacteriia;o__Fusobacteriales;f__Fusobacteriaceae;g__Fusobacterium;s__multispecies_spp11_4	0	0	0	0	0	0	0	0	0	0	0	0	0	0	0	0	0	0	0	0	0	0	0	0	0	0	0	0	0.000954654	0	0	0	0	0	0
k__Bacteria;p__Fusobacteria;c__Fusobacteriia;o__Fusobacteriales;f__Fusobacteriaceae;g__Fusobacterium;s__multispecies_spp18_2	0	0	0.000403877	0	0	0	0	0.000514933	0	0	0	0	0	0	0	0	0	0	0	0	0	0.00083682	0	0	0	0	0	0	0	0	0	0	0	0	0
k__Bacteria;p__Fusobacteria;c__Fusobacteriia;o__Fusobacteriales;f__Fusobacteriaceae;g__Fusobacterium;s__multispecies_spp35_3	0	0	0	0	0	0.000819336	0	0	0	0	0	0	0	0	0	0	0	0	0	0	0	0	0	0	0	0	0	0	0.000954654	0	0	0	0	0	0
k__Bacteria;p__Fusobacteria;c__Fusobacteriia;o__Fusobacteriales;f__Fusobacteriaceae;g__Fusobacterium;s__multispecies_spp43_5	0	0	0.000403877	0	0	0	0.00124378	0.000514933	0	0	0	0	0	0	0	0	0	0	0	0	0	0	0	0	0	0	0	0	0	0	0	0	0	0	0
k__Bacteria;p__Fusobacteria;c__Fusobacteriia;o__Fusobacteriales;f__Fusobacteriaceae;g__Fusobacterium;s__multispecies_spp44_4	0	0	0.000403877	0	0	0.00163867	0	0.0015448	0.000507099	0	0	0	0	0	0	0	0	0.000689655	0	0	0	0	0	0	0	0	0	0	0	0.000412371	0.00129199	0	0.0011274	0	0
k__Bacteria;p__Fusobacteria;c__Fusobacteriia;o__Fusobacteriales;f__Fusobacteriaceae;g__Fusobacterium;s__multispecies_spp45_2	0	0	0	0	0	0	0	0	0	0	0	0	0	0.00187793	0	0	0	0	0	0	0	0	0	0	0	0	0	0	0	0	0	0	0	0	0
k__Bacteria;p__Fusobacteria;c__Fusobacteriia;o__Fusobacteriales;f__Fusobacteriaceae;g__Fusobacterium;s__multispecies_spp46_2	0	0.00176678	0	0	0	0	0	0.00566426	0	0	0.00129702	0	0	0	0	0.000540833	0	0.00206897	0	0	0	0	0	0	0	0	0.000557414	0.00044287	0	0	0.000430663	0.00132363	0.000563698	0	0
k__Bacteria;p__Fusobacteria;c__Fusobacteriia;o__Fusobacteriales;f__Fusobacteriaceae;g__Fusobacterium;s__multispecies_spp47_3	0	0	0	0	0	0	0	0	0	0	0	0	0	0	0	0	0	0	0	0	0	0.00083682	0	0	0	0	0	0	0	0	0	0.000661813	0	0	0
k__Bacteria;p__Fusobacteria;c__Fusobacteriia;o__Fusobacteriales;f__Fusobacteriaceae;g__Fusobacterium;s__multispecies_spp48_2	0	0	0	0	0	0	0	0.00566426	0	0	0.000648508	0	0	0.00187793	0	0.00108167	0	0.00206897	0.00034118	0	0.00125156	0	0.00056243	0	0	0	0	0	0.0195704	0	0.000430663	0.00463269	0.000563698	0.00119832	0
k__Bacteria;p__Fusobacteria;c__Fusobacteriia;o__Fusobacteriales;f__Fusobacteriaceae;g__Fusobacterium;s__multispecies_spp9_3	0	0	0	0	0	0	0	0.000514933	0	0.000469043	0	0	0	0	0	0	0	0	0	0	0	0	0	0	0	0	0	0	0	0	0	0	0	0	0
k__Bacteria;p__Fusobacteria;c__Fusobacteriia;o__Fusobacteriales;f__Fusobacteriaceae;g__Fusobacterium;s__necrophorum	0	0	0	0	0	0	0	0	0	0	0	0	0	0	0	0	0	0	0	0	0	0	0	0	0	0	0	0.0044287	0	0	0	0	0	0	0
k__Bacteria;p__Fusobacteria;c__Fusobacteriia;o__Fusobacteriales;f__Fusobacteriaceae;g__Fusobacterium;s__nucleatum	0	0.00176678	0	0.000456204	0	0.001229	0.000621891	0.00566426	0.000507099	0.000469043	0	0.00149701	0.00073046	0.000938967	0	0	0	0	0.00034118	0	0	0.00167364	0	0.000460829	0.000596125	0	0.00222965	0.00044287	0.000477327	0.000412371	0	0.00132363	0.00169109	0.00179748	0
k__Bacteria;p__Fusobacteria;c__Fusobacteriia;o__Fusobacteriales;f__Fusobacteriaceae;g__Fusobacterium;s__nucleatum_subsp._animalis	0	0	0	0	0	0	0	0	0	0	0	0	0	0	0	0	0	0	0	0	0	0	0	0	0	0	0	0	0	0	0	0.000661813	0	0	0
k__Bacteria;p__Fusobacteria;c__Fusobacteriia;o__Fusobacteriales;f__Fusobacteriaceae;g__Fusobacterium;s__nucleatum_subsp._vincentii	0	0	0	0	0	0	0	0	0.000507099	0	0.00389105	0	0	0.000938967	0	0	0	0.000689655	0	0	0	0	0	0	0	0	0.000557414	0	0	0	0	0.00330907	0	0	0
k__Bacteria;p__Fusobacteria;c__Fusobacteriia;o__Fusobacteriales;f__Fusobacteriaceae;g__Fusobacterium;s__periodonticum	0.00181488	0.0300353	0.00121163	0.0150547	0.019573	0.0356411	0.0211443	0.00360453	0.0537525	0.0173546	0.00259403	0.0808383	0	0.0150235	0.0558804	0.0411033	0	0.0324138	0.000682361	0.0188798	0.0162703	0.00585774	0.0528684	0.00184332	0.00387481	0.000638978	0.0328874	0.0234721	0.00190931	0.0445361	0.0271318	0.000661813	0.0174746	0.0826842	0.0948012
k__Bacteria;p__Fusobacteria;c__Fusobacteriia;o__Fusobacteriales;f__Fusobacteriaceae;g__Fusobacterium;s__simiae	0	0	0	0	0	0	0	0.0015448	0	0.000938086	0	0	0	0.00187793	0.000649773	0	0	0	0	0	0	0	0	0	0	0	0	0	0	0.000412371	0	0	0.0011274	0	0
k__Bacteria;p__Fusobacteria;c__Fusobacteriia;o__Fusobacteriales;f__Fusobacteriaceae;g__Fusobacterium;s__sp._oral_taxon_203	0	0	0	0	0.000711744	0	0.00808458	0	0	0	0	0.00149701	0	0	0	0.00108167	0	0.00482759	0.00102354	0	0.0068836	0	0	0.000460829	0	0	0	0	0	0	0	0.00794176	0.00676437	0	0
k__Bacteria;p__Fusobacteria;c__Fusobacteriia;o__Fusobacteriales;f__Fusobacteriaceae;g__Fusobacterium;s__sp._oral_taxon_370	0	0	0	0	0	0	0	0.000514933	0	0	0	0	0	0	0	0	0	0.000689655	0	0	0	0	0	0	0.00119225	0	0	0	0	0	0	0.00132363	0.00281849	0.00119832	0.000509684
k__Bacteria;p__Fusobacteria;c__Fusobacteriia;o__Fusobacteriales;f__Leptotrichiaceae;g__Leptotrichia;s__buccalis	0	0.00176678	0	0	0	0.001229	0.000621891	0.0133883	0	0.00375235	0	0.00149701	0.0131483	0.0084507	0.000649773	0	0	0.00137931	0.00238826	0.000629327	0.00813517	0.00083682	0.00056243	0	0	0	0.000557414	0	0	0.000412371	0	0.000661813	0.00450958	0.000599161	0
k__Bacteria;p__Fusobacteria;c__Fusobacteriia;o__Fusobacteriales;f__Leptotrichiaceae;g__Leptotrichia;s__goodfellowii	0	0	0.000403877	0	0	0	0	0.000514933	0	0.000469043	0	0	0	0	0	0	0	0.000689655	0	0	0	0.00167364	0	0	0	0	0	0	0	0	0	0	0	0	0
k__Bacteria;p__Fusobacteria;c__Fusobacteriia;o__Fusobacteriales;f__Leptotrichiaceae;g__Leptotrichia;s__hofstadii	0.00181488	0.00353357	0	0	0	0	0.00621891	0.0108136	0	0.021576	0	0.00149701	0.00949598	0.000938967	0	0	0	0.00206897	0.00102354	0	0.00375469	0.00167364	0	0.00138249	0	0	0	0	0	0.000824742	0	0	0.00338219	0.000599161	0
k__Bacteria;p__Fusobacteria;c__Fusobacteriia;o__Fusobacteriales;f__Leptotrichiaceae;g__Leptotrichia;s__hongkongensis	0	0	0.000403877	0	0.000355872	0	0.00186567	0.00257467	0	0.011257	0	0.00149701	0.00511322	0.000938967	0	0	0	0.00551724	0.000682361	0	0.00125156	0.00585774	0	0	0.00149031	0	0	0	0.000477327	0	0	0	0.000563698	0	0
k__Bacteria;p__Fusobacteria;c__Fusobacteriia;o__Fusobacteriales;f__Leptotrichiaceae;g__Leptotrichia;s__multispecies_spp16_2	0	0	0	0	0.000355872	0	0	0.00102987	0	0	0	0	0	0	0	0	0	0	0	0.000629327	0	0	0	0	0	0	0	0	0	0	0	0	0	0.00119832	0
k__Bacteria;p__Fusobacteria;c__Fusobacteriia;o__Fusobacteriales;f__Leptotrichiaceae;g__Leptotrichia;s__multispecies_spp31_2	0	0	0	0	0	0	0	0	0.0040568	0	0	0	0	0	0	0	0	0	0	0	0	0	0	0	0	0	0	0	0	0	0	0	0	0	0
k__Bacteria;p__Fusobacteria;c__Fusobacteriia;o__Fusobacteriales;f__Leptotrichiaceae;g__Leptotrichia;s__multispecies_spp8_2	0	0	0	0	0	0	0	0	0	0	0	0	0	0	0	0	0	0	0	0	0	0	0.00056243	0	0	0	0	0	0	0	0	0	0	0	0.000509684
k__Bacteria;p__Fusobacteria;c__Fusobacteriia;o__Fusobacteriales;f__Leptotrichiaceae;g__Leptotrichia;s__multispecies_sppn1_2_nov_97.99%	0	0	0	0	0	0	0.000621891	0	0	0	0.000648508	0	0	0	0	0	0	0.000689655	0	0	0	0	0	0	0	0	0	0	0	0	0	0	0	0.00119832	0.000509684
k__Bacteria;p__Fusobacteria;c__Fusobacteriia;o__Fusobacteriales;f__Leptotrichiaceae;g__Leptotrichia;s__shahii	0.00181488	0	0	0	0	0.000819336	0	0.00102987	0	0	0	0.00149701	0.0262966	0.000938967	0.000649773	0	0	0.00137931	0.000682361	0	0	0	0	0	0	0.000638978	0	0.00044287	0	0.000824742	0	0.00198544	0	0	0
k__Bacteria;p__Fusobacteria;c__Fusobacteriia;o__Fusobacteriales;f__Leptotrichiaceae;g__Leptotrichia;s__sp._oral_taxon_212	0	0	0.000403877	0	0.000711744	0.000409668	0.00373134	0.00360453	0.000507099	0.00375235	0	0.00299401	0	0.000938967	0.000649773	0.00216333	0	0.00758621	0	0.00188798	0.00187735	0.00251046	0.00056243	0	0	0	0.00278707	0	0	0	0	0	0.00507328	0.000599161	0
k__Bacteria;p__Fusobacteria;c__Fusobacteriia;o__Fusobacteriales;f__Leptotrichiaceae;g__Leptotrichia;s__sp._oral_taxon_215	0	0.00353357	0	0.00273723	0.00355872	0	0	0.00205973	0.0020284	0	0	0	0	0.000938967	0.0233918	0.000540833	0	0.00137931	0	0.000629327	0	0.00251046	0.00168729	0	0.00119225	0	0.0128205	0.0194863	0.000477327	0.00494845	0.0081826	0.000661813	0	0.0155782	0.00509684
k__Bacteria;p__Fusobacteria;c__Fusobacteriia;o__Fusobacteriales;f__Leptotrichiaceae;g__Leptotrichia;s__sp._oral_taxon_218	0	0	0	0	0	0	0.00124378	0	0	0	0	0	0	0	0	0	0	0.00206897	0	0.00125865	0	0	0	0.0801843	0	0	0	0	0.00286396	0	0	0	0	0	0
k__Bacteria;p__Fusobacteria;c__Fusobacteriia;o__Fusobacteriales;f__Leptotrichiaceae;g__Leptotrichia;s__sp._oral_taxon_219	0	0.00176678	0	0	0	0.000819336	0	0.0015448	0	0	0	0	0	0	0.000649773	0	0	0.00206897	0.00034118	0	0.000625782	0	0	0.000460829	0	0	0.000557414	0	0	0	0	0.00198544	0	0	0
k__Bacteria;p__Fusobacteria;c__Fusobacteriia;o__Fusobacteriales;f__Leptotrichiaceae;g__Leptotrichia;s__sp._oral_taxon_221	0	0.00883392	0.0210016	0.00866788	0	0	0.0199005	0.000514933	0	0.00140713	0	0.00299401	0	0.00751174	0.02859	0.0135208	0	0.00689655	0.0109178	0.00188798	0	0	0	0.0115207	0	0	0	0.0088574	0	0.00123711	0	0.0238253	0.00338219	0.00479329	0
k__Bacteria;p__Fusobacteria;c__Fusobacteriia;o__Fusobacteriales;f__Leptotrichiaceae;g__Leptotrichia;s__sp._oral_taxon_223	0	0	0	0	0	0.000409668	0	0.00102987	0	0	0	0	0	0	0	0	0	0.00275862	0	0	0.000625782	0.00083682	0	0	0	0	0	0	0	0	0	0	0	0	0
k__Bacteria;p__Fusobacteria;c__Fusobacteriia;o__Fusobacteriales;f__Leptotrichiaceae;g__Leptotrichia;s__sp._oral_taxon_225	0	0.00176678	0.000807754	0	0	0.001229	0	0	0.0035497	0.00797373	0	0	0	0.000938967	0	0.00108167	0	0	0	0.00125865	0	0	0	0	0.00149031	0	0.00167224	0	0.000477327	0.000412371	0	0	0.0011274	0	0.00101937
k__Bacteria;p__Fusobacteria;c__Fusobacteriia;o__Fusobacteriales;f__Leptotrichiaceae;g__Leptotrichia;s__sp._oral_taxon_392	0	0.00353357	0	0	0	0.00204834	0.000621891	0.00566426	0	0.00609756	0	0	0.00073046	0	0.000649773	0	0	0	0	0	0.00125156	0.00167364	0	0	0	0	0.00222965	0	0	0	0.000430663	0.000661813	0.000563698	0.00359497	0.000509684
k__Bacteria;p__Fusobacteria;c__Fusobacteriia;o__Fusobacteriales;f__Leptotrichiaceae;g__Leptotrichia;s__sp._oral_taxon_417	0	0.00706714	0.00565428	0.0237226	0.00533808	0.000819336	0.0174129	0.0149331	0.0020284	0.000938086	0.220493	0.00149701	0	0.0450704	0.0649773	0.0205516	0	0.000689655	0.0354828	0.0465702	0.00187735	0.0041841	0.0275591	0.0705069	0.0125186	0.00383387	0.0540691	0.034101	0.00668258	0.00865979	0.0189492	0.0119126	0.000563698	0.00119832	0.019368
k__Bacteria;p__Fusobacteria;c__Fusobacteriia;o__Fusobacteriales;f__Leptotrichiaceae;g__Leptotrichia;s__sp._oral_taxon_463	0	0	0	0	0	0	0	0	0	0	0	0	0	0	0	0	0	0	0	0	0.00125156	0	0	0.00414747	0	0	0.00111483	0	0	0	0	0	0.0011274	0	0
k__Bacteria;p__Fusobacteria;c__Fusobacteriia;o__Fusobacteriales;f__Leptotrichiaceae;g__Leptotrichia;s__sp._oral_taxon_498	0	0	0	0	0	0	0	0.0128733	0.000507099	0	0	0	0.00584368	0	0	0	0	0	0.00034118	0.000629327	0.00125156	0	0	0	0	0	0	0	0	0	0	0	0.00225479	0.000599161	0
k__Bacteria;p__Fusobacteria;c__Fusobacteriia;o__Fusobacteriales;f__Leptotrichiaceae;g__Leptotrichia;s__sp._oral_taxon_909	0	0	0	0	0	0	0	0	0	0	0	0	0	0	0	0	0	0	0	0	0	0	0	0	0	0	0	0	0	0	0	0.000661813	0	0	0
k__Bacteria;p__Fusobacteria;c__Fusobacteriia;o__Fusobacteriales;f__Leptotrichiaceae;g__Leptotrichia;s__trevisanii	0	0	0	0	0	0	0	0	0	0.00234522	0	0	0	0	0	0	0	0	0	0	0	0.00251046	0	0	0	0	0	0	0	0	0	0.000661813	0	0	0
k__Bacteria;p__Fusobacteria;c__Fusobacteriia;o__Fusobacteriales;f__Leptotrichiaceae;g__Leptotrichia;s__wadei	0	0	0.00121163	0	0	0	0	0.00360453	0	0.000469043	0	0	0.00511322	0	0.000649773	0	0	0	0.00034118	0	0	0	0	0	0.000298063	0	0.00111483	0	0	0	0	0.00132363	0	0	0
k__Bacteria;p__Fusobacteria;c__Fusobacteriia;o__Fusobacteriales;f__Leptotrichiaceae;g__Sneathia;s__amnii_[NVP]	0	0	0	0	0	0	0	0	0	0	0	0	0	0	0	0	0	0.000689655	0	0	0	0	0	0	0	0	0	0	0	0	0	0	0	0	0
k__Bacteria;p__Gracilibacteria_(GN02);c__GN02_[C-1];o__GN02_[O-1];f__GN02_[F-1];g__GN02_[G-1];s__sp._oral_taxon_871	0	0	0	0	0	0	0	0	0	0	0	0	0	0	0	0	0	0	0	0	0	0	0	0	0	0	0	0	0	0	0	0	0.000563698	0	0
k__Bacteria;p__Gracilibacteria_(GN02);c__GN02_[C-1];o__GN02_[O-1];f__GN02_[F-1];g__GN02_[G-1];s__sp._oral_taxon_872	0	0	0.000403877	0	0	0	0	0.0015448	0	0	0	0	0	0	0	0	0	0	0	0	0	0	0	0	0	0	0	0	0	0	0	0	0	0	0
k__Bacteria;p__Gracilibacteria_(GN02);c__GN02_[C-2];o__GN02_[O-2];f__GN02_[F-2];g__GN02_[G-2];s__sp._oral_taxon_873	0	0	0	0	0.00177936	0.0188447	0	0.0030896	0	0.00140713	0	0	0.00073046	0	0	0	0	0	0.00034118	0	0.00375469	0	0	0	0.000894188	0	0	0	0	0	0	0	0.0011274	0	0
k__Bacteria;p__Proteobacteria;c__Alphaproteobacteria;o__Rhizobiales;f__Methylobacteriaceae;g__Methylobacterium;s__organophilum	0	0	0	0	0	0	0	0	0	0.000469043	0	0	0	0	0	0	0	0	0	0	0	0	0	0	0	0	0	0	0	0	0	0	0	0	0
k__Bacteria;p__Proteobacteria;c__Alphaproteobacteria;o__Sphingomonadales;f__Sphingomonadaceae;g__Novosphingobium;s__subterraneum	0	0	0	0	0	0	0	0	0	0	0	0	0	0	0	0	0	0	0	0	0	0	0	0	0	0	0	0	0.000477327	0	0	0	0	0	0
k__Bacteria;p__Proteobacteria;c__Alphaproteobacteria;o__Sphingomonadales;f__Sphingomonadaceae;g__Zymomonas;s__mobilis	0	0	0	0	0	0	0.000621891	0	0	0	0	0	0	0	0	0	0	0	0	0	0	0	0	0	0	0	0	0	0	0	0	0	0	0	0
k__Bacteria;p__Proteobacteria;c__Betaproteobacteria;o__Burkholderiales;f__Burkholderiaceae;g__Lautropia;s__mirabilis	0.00181488	0.00706714	0.000403877	0.00729927	0.00284698	0.00942237	0.00559701	0.0159629	0.00760649	0.011257	0	0.0314371	0.0306793	0.00751174	0	0.0108167	0	0.0751724	0.00136472	0.00188798	0.0125156	0.0217573	0.00168729	0.00414747	0.00387481	0.00127796	0.0234114	0.00044287	0.00668258	0.00371134	0.00516796	0.00330907	0.0546787	0.00179748	0
k__Bacteria;p__Proteobacteria;c__Betaproteobacteria;o__Burkholderiales;f__Comamonadaceae;g__Ottowia;s__sp._oral_taxon_894	0	0	0	0	0	0.001229	0	0.000514933	0.0015213	0.0065666	0	0.00149701	0.0102264	0	0	0.000540833	0	0.000689655	0	0	0	0.00167364	0	0	0.000298063	0	0	0	0.000954654	0	0	0.00397088	0.000563698	0	0.00101937
k__Bacteria;p__Proteobacteria;c__Betaproteobacteria;o__Neisseriales;f__Neisseriaceae;g__Eikenella;s__corrodens	0	0	0	0	0	0.000409668	0.00124378	0.000514933	0	0	0	0	0	0	0	0	0	0	0	0	0.000625782	0	0.00056243	0	0.000298063	0	0.00111483	0	0	0	0	0.000661813	0	0.000599161	0
k__Bacteria;p__Proteobacteria;c__Betaproteobacteria;o__Neisseriales;f__Neisseriaceae;g__Kingella;s__denitrificans	0	0	0	0	0.00213523	0.00163867	0	0	0.0010142	0	0	0	0	0	0	0	0	0.00137931	0.00034118	0	0.000625782	0	0	0	0	0	0.000557414	0	0	0	0	0.00198544	0	0	0
k__Bacteria;p__Proteobacteria;c__Betaproteobacteria;o__Neisseriales;f__Neisseriaceae;g__Kingella;s__kingae	0	0	0	0	0	0	0	0	0	0	0	0	0	0	0	0	0	0	0	0	0	0	0	0	0	0	0	0	0	0	0	0	0.000563698	0	0
k__Bacteria;p__Proteobacteria;c__Betaproteobacteria;o__Neisseriales;f__Neisseriaceae;g__Kingella;s__oralis	0	0	0.000403877	0.000456204	0.000711744	0	0.00373134	0.000514933	0	0.000938086	0	0	0.00073046	0	0	0	0	0.00137931	0.00102354	0	0	0	0	0	0	0	0	0	0.00286396	0.000412371	0	0.00397088	0.000563698	0	0
k__Bacteria;p__Proteobacteria;c__Betaproteobacteria;o__Neisseriales;f__Neisseriaceae;g__Kingella;s__sp._oral_taxon_012	0	0	0	0	0	0.000409668	0	0	0	0	0	0	0	0	0	0	0	0.00275862	0	0	0	0	0	0	0	0	0	0	0	0	0	0	0.000563698	0	0
k__Bacteria;p__Proteobacteria;c__Betaproteobacteria;o__Neisseriales;f__Neisseriaceae;g__Kingella;s__sp._oral_taxon_459	0	0	0	0	0	0	0.000621891	0	0	0.00234522	0	0	0	0	0	0	0	0	0	0	0	0	0	0	0	0	0	0	0	0	0	0	0	0	0.00203874
k__Bacteria;p__Proteobacteria;c__Betaproteobacteria;o__Neisseriales;f__Neisseriaceae;g__Kingella;s__sp._oral_taxon_932	0	0	0	0	0	0	0	0	0	0	0	0	0	0	0	0	0	0	0	0	0	0	0	0	0	0	0	0	0	0.00123711	0	0	0	0	0
k__Bacteria;p__Proteobacteria;c__Betaproteobacteria;o__Neisseriales;f__Neisseriaceae;g__Morococcus;s__cerebrosus	0	0	0	0	0	0	0	0	0	0	0	0.00299401	0	0	0	0	0	0	0	0	0	0	0	0	0	0	0	0	0	0	0	0	0	0	0
k__Bacteria;p__Proteobacteria;c__Betaproteobacteria;o__Neisseriales;f__Neisseriaceae;g__Neisseria;s__bacilliformis	0	0	0	0	0	0	0	0.000514933	0	0	0	0	0	0	0	0	0	0	0.00204708	0	0	0	0	0	0	0	0	0	0	0	0	0	0	0	0
k__Bacteria;p__Proteobacteria;c__Betaproteobacteria;o__Neisseriales;f__Neisseriaceae;g__Neisseria;s__cinerea	0	0	0	0.000456204	0	0	0	0	0	0.000469043	0	0	0	0.00187793	0	0	0	0	0	0	0	0	0	0	0.00178838	0	0	0	0	0	0	0.000661813	0	0	0
k__Bacteria;p__Proteobacteria;c__Betaproteobacteria;o__Neisseriales;f__Neisseriaceae;g__Neisseria;s__elongata	0	0	0	0.000912409	0.0380783	0.01229	0.00186567	0.00360453	0.000507099	0.0182927	0	0.00748503	0.00219138	0	0	0.00270416	0	0.00551724	0	0.00440529	0.00625782	0	0	0.000921659	0.00983607	0	0.00111483	0	0.000477327	0.00494845	0	0.00529451	0.00901917	0.00179748	0.000509684
k__Bacteria;p__Proteobacteria;c__Betaproteobacteria;o__Neisseriales;f__Neisseriaceae;g__Neisseria;s__mucosa	0	0	0	0	0	0	0.000621891	0	0	0	0	0.00748503	0	0	0	0	0.000598444	0	0	0	0.00187735	0	0	0	0.00506706	0	0.0167224	0	0	0	0	0	0	0	0
k__Bacteria;p__Proteobacteria;c__Betaproteobacteria;o__Neisseriales;f__Neisseriaceae;g__Neisseria;s__multispecies_spp13_2	0	0	0	0	0	0	0	0	0	0.00140713	0	0	0	0	0	0	0	0	0	0	0	0	0	0	0	0	0.0039019	0	0	0	0	0	0	0	0
k__Bacteria;p__Proteobacteria;c__Betaproteobacteria;o__Neisseriales;f__Neisseriaceae;g__Neisseria;s__multispecies_spp38_2	0.0108893	0.0123675	0.00242326	0	0.0145907	0	0.00808458	0.00978373	0	0.0201689	0	0.0718563	0	0.0056338	0.00129955	0.0221741	0	0.00206897	0	0	0	0.0560669	0	0.00368664	0.00149031	0	0.0239688	0	0.000477327	0.00164948	0.0146425	0.00794176	0.0400225	0	0
k__Bacteria;p__Proteobacteria;c__Betaproteobacteria;o__Neisseriales;f__Neisseriaceae;g__Neisseria;s__multispecies_spp39_2	0.0254083	0.0318021	0	0.0497263	0	0	0.0199005	0.00102987	0	0	0	0.00898204	0.00073046	0.0366197	0.0259909	0.01298	0	0.0889655	0.0723303	0.00629327	0	0	0	0	0	0	0	0	0	0.0160825	0	0.00264725	0	0	0
k__Bacteria;p__Proteobacteria;c__Betaproteobacteria;o__Neisseriales;f__Neisseriaceae;g__Neisseria;s__multispecies_spp42_4	0	0.00176678	0.000807754	0.000456204	0.00106762	0.0147481	0.00746269	0.0015448	0.000507099	0.00375235	0	0	0.00292184	0.0103286	0	0	0.00777977	0.0303448	0.00580007	0	0.0068836	0.0301255	0.015748	0	0.00119225	0.00766773	0	0	0.00429594	0.0251546	0.000430663	0.00463269	0.0118377	0	0.00101937
k__Bacteria;p__Proteobacteria;c__Betaproteobacteria;o__Neisseriales;f__Neisseriaceae;g__Neisseria;s__oralis	0	0	0.00646204	0	0	0	0.00497512	0	0.000507099	0	0	0	0	0	0.000649773	0.00865333	0	0.02	0.0122825	0.00125865	0	0	0.0056243	0	0	0	0	0	0	0.0354639	0	0.00264725	0.00620068	0	0.000509684
k__Bacteria;p__Proteobacteria;c__Betaproteobacteria;o__Neisseriales;f__Neisseriaceae;g__Neisseria;s__pharyngis	0	0	0	0.000456204	0.00284698	0.00696436	0.00497512	0	0.0015213	0.0032833	0	0	0	0	0	0.00270416	0	0	0	0	0.00375469	0	0	0.00138249	0	0	0	0	0.00286396	0.00164948	0	0	0.00901917	0.00119832	0.00254842
k__Bacteria;p__Proteobacteria;c__Betaproteobacteria;o__Neisseriales;f__Neisseriaceae;g__Neisseria;s__sp._oral_taxon_018	0	0	0	0	0.00569395	0.00163867	0	0	0	0	0	0	0	0	0	0	0	0	0	0	0	0	0	0	0	0	0	0	0	0	0	0	0.000563698	0	0
k__Bacteria;p__Proteobacteria;c__Betaproteobacteria;o__Neisseriales;f__Neisseriaceae;g__Neisseria;s__sp._oral_taxon_018_nov_97.67%	0	0	0	0	0	0	0	0	0	0	0	0	0	0	0	0	0	0.00275862	0	0	0	0	0	0	0	0	0	0	0	0	0	0	0	0	0
k__Bacteria;p__Proteobacteria;c__Betaproteobacteria;o__Neisseriales;f__Neisseriaceae;g__Neisseria;s__sp._oral_taxon_020	0	0	0	0	0	0.000409668	0	0	0	0	0	0	0.00073046	0	0	0.0016225	0	0	0	0	0.00438048	0.00251046	0	0	0	0	0	0	0	0	0	0	0.00169109	0	0
k__Bacteria;p__Proteobacteria;c__Betaproteobacteria;o__Neisseriales;f__Neisseriaceae;g__Neisseria;s__subflava	0.092559	0.090106	0.105008	0.15146	0.274021	0.368701	0.178483	0.00205973	0.502535	0.255629	0.0155642	0.00449102	0.00511322	0.0140845	0.00194932	0.0984316	0.0879713	0.000689655	0.00272944	0.0163625	0.46433	0.00167364	0.00449944	0.218894	0.119523	0.0421725	0.00111483	0	0.12506	0.062268	0.387166	0	0.306652	0.137807	0.262487
k__Bacteria;p__Proteobacteria;c__Betaproteobacteria;o__Neisseriales;f__Neisseriaceae;g__Simonsiella;s__muelleri	0	0	0	0	0	0	0	0	0	0	0.000648508	0	0	0	0	0	0	0	0	0	0	0	0	0	0	0	0	0	0	0	0	0	0	0	0
k__Bacteria;p__Proteobacteria;c__Betaproteobacteria;o__Rhodocyclales;f__Rhodocyclaceae;g__Propionivibrio;s__sp._Oral_Taxon_C33	0	0	0	0	0	0	0	0	0	0	0	0	0	0	0	0	0	0	0	0	0	0	0	0	0	0	0	0	0	0	0	0	0.000563698	0	0
k__Bacteria;p__Proteobacteria;c__Deltaproteobacteria;o__Desulfobacterales;f__Desulfobulbaceae;g__Desulfobulbus;s__sp._oral_taxon_041	0	0	0	0	0	0.000409668	0	0	0	0	0	0	0	0	0	0.000540833	0	0	0	0	0	0	0	0	0	0	0	0	0	0	0	0.000661813	0	0	0
k__Bacteria;p__Proteobacteria;c__Epsilonproteobacteria;o__Campylobacterales;f__Campylobacteraceae;g__Campylobacter;s__concisus	0.00362976	0.00176678	0.00565428	0.00364964	0.00142349	0.00327735	0.00621891	0.000514933	0	0	0.00518807	0.00149701	0.0146092	0.0028169	0.000649773	0.00270416	0	0.00344828	0.00307062	0.00188798	0.00250313	0.00167364	0.00281215	0.00276498	0.00327869	0.00255591	0.0267559	0.0044287	0.00286396	0.025567	0.000430663	0.00198544	0.00225479	0.00239664	0.00254842
k__Bacteria;p__Proteobacteria;c__Epsilonproteobacteria;o__Campylobacterales;f__Campylobacteraceae;g__Campylobacter;s__curvus	0	0	0	0	0	0	0	0	0	0	0	0	0.00219138	0	0	0	0	0	0	0	0	0	0	0	0	0	0.000557414	0	0	0	0	0	0	0	0
k__Bacteria;p__Proteobacteria;c__Epsilonproteobacteria;o__Campylobacterales;f__Campylobacteraceae;g__Campylobacter;s__gracilis	0	0	0.000807754	0	0	0	0.00124378	0.00102987	0	0.000938086	0	0	0	0	0.000649773	0	0	0.000689655	0.000682361	0	0	0.00083682	0	0	0	0	0.00111483	0	0.000954654	0.00164948	0	0.00132363	0.00225479	0	0
k__Bacteria;p__Proteobacteria;c__Epsilonproteobacteria;o__Campylobacterales;f__Campylobacteraceae;g__Campylobacter;s__multispecies_spp7_2	0	0	0	0	0	0	0.000621891	0.000514933	0	0	0	0.00149701	0.00146092	0	0	0.00108167	0	0	0.00034118	0	0	0	0.00674916	0	0	0	0.000557414	0	0.00334129	0.000824742	0	0	0	0	0.00152905
k__Bacteria;p__Proteobacteria;c__Epsilonproteobacteria;o__Campylobacterales;f__Campylobacteraceae;g__Campylobacter;s__showae	0	0	0	0	0	0	0	0	0	0	0	0	0	0	0	0	0	0	0	0	0	0	0.00056243	0	0	0	0	0	0	0	0	0	0	0	0
k__Bacteria;p__Proteobacteria;c__Epsilonproteobacteria;o__Campylobacterales;f__Campylobacteraceae;g__Campylobacter;s__sp._oral_taxon_044	0	0	0	0	0	0	0	0.0015448	0	0	0.000648508	0	0	0	0.00389864	0	0	0	0	0	0	0	0	0	0	0	0	0	0	0.000412371	0	0	0	0	0
k__Bacteria;p__Proteobacteria;c__Gammaproteobacteria;o__Cardiobacteriales;f__Cardiobacteriaceae;g__Cardiobacterium;s__hominis	0	0	0	0	0.000355872	0.000409668	0.00373134	0.0046344	0	0.00187617	0.000648508	0	0.00146092	0	0	0.00108167	0	0.00137931	0	0.00125865	0	0	0	0.000460829	0.000298063	0	0.000557414	0	0	0	0	0.00661813	0.0011274	0.000599161	0.000509684
k__Bacteria;p__Proteobacteria;c__Gammaproteobacteria;o__Cardiobacteriales;f__Cardiobacteriaceae;g__Cardiobacterium;s__valvarum	0	0	0	0	0	0	0.00186567	0.00669413	0	0.00469043	0	0	0.00073046	0	0	0	0	0.000689655	0	0	0	0	0	0	0	0	0	0	0	0	0	0.00330907	0.000563698	0	0
k__Bacteria;p__Proteobacteria;c__Gammaproteobacteria;o__Enterobacterales;f__Enterobacteriaceae;g__Escherichia;s__vulneris	0	0	0	0	0	0	0	0	0	0.000469043	0	0	0	0	0	0	0	0	0	0	0	0	0	0	0	0	0	0	0	0	0	0	0	0	0
k__Bacteria;p__Proteobacteria;c__Gammaproteobacteria;o__Pasteurellales;f__Pasteurellaceae;g__Aggregatibacter;s__actinomycetemcomitans	0	0	0	0	0	0	0	0	0	0	0	0	0	0	0	0	0	0	0	0	0	0	0	0	0	0	0	0	0	0	0	0.00198544	0	0	0
k__Bacteria;p__Proteobacteria;c__Gammaproteobacteria;o__Pasteurellales;f__Pasteurellaceae;g__Aggregatibacter;s__aphrophilus	0	0	0.000403877	0	0.000355872	0.00368701	0	0	0	0	0	0	0.00073046	0	0	0	0.000598444	0.000689655	0.00034118	0	0	0	0	0	0	0	0.00278707	0	0	0	0	0	0	0	0
k__Bacteria;p__Proteobacteria;c__Gammaproteobacteria;o__Pasteurellales;f__Pasteurellaceae;g__Aggregatibacter;s__multispecies_spp36_2	0	0.00353357	0	0	0	0.000409668	0	0.00102987	0	0	0	0	0.00073046	0	0	0	0	0	0	0	0.000625782	0	0	0	0	0	0	0	0	0.000824742	0	0	0.000563698	0.000599161	0
k__Bacteria;p__Proteobacteria;c__Gammaproteobacteria;o__Pasteurellales;f__Pasteurellaceae;g__Aggregatibacter;s__paraphrophilus	0	0	0	0	0	0	0	0	0	0	0	0	0	0	0	0	0	0.000689655	0	0	0	0	0	0	0	0	0	0	0	0.000824742	0	0.00132363	0	0	0
k__Bacteria;p__Proteobacteria;c__Gammaproteobacteria;o__Pasteurellales;f__Pasteurellaceae;g__Aggregatibacter;s__sp._oral_taxon_458	0	0	0	0	0	0.001229	0.000621891	0.000514933	0	0.00234522	0	0.00299401	0.00292184	0.00375587	0	0.000540833	0	0	0.00102354	0	0.00625782	0.0803347	0	0	0	0	0.00222965	0	0	0.000824742	0	0.00198544	0.0124014	0	0
k__Bacteria;p__Proteobacteria;c__Gammaproteobacteria;o__Pasteurellales;f__Pasteurellaceae;g__Aggregatibacter;s__sp._oral_taxon_949	0	0	0	0	0	0	0	0	0	0	0	0	0.00073046	0	0	0	0	0	0	0	0.000625782	0	0	0	0	0	0	0	0	0	0	0	0	0	0
k__Bacteria;p__Proteobacteria;c__Gammaproteobacteria;o__Pasteurellales;f__Pasteurellaceae;g__Haemophilus;s__haemolyticus	0	0	0	0	0.000355872	0.00450635	0	0.000514933	0	0.00187617	0	0	0	0	0	0	0	0	0.00136472	0	0	0.0133891	0	0.000921659	0.000596125	0.000638978	0.00111483	0	0	0	0.000430663	0.000661813	0	0.000599161	0
k__Bacteria;p__Proteobacteria;c__Gammaproteobacteria;o__Pasteurellales;f__Pasteurellaceae;g__Haemophilus;s__influenzae	0	0	0	0	0	0	0	0	0	0	0	0	0	0	0	0	0	0	0	0	0	0	0	0	0	0.000638978	0.000557414	0	0	0	0	0	0	0	0
k__Bacteria;p__Proteobacteria;c__Gammaproteobacteria;o__Pasteurellales;f__Pasteurellaceae;g__Haemophilus;s__parahaemolyticus	0	0	0	0.000456204	0.00533808	0.00696436	0	0	0.000507099	0.000938086	0	0.00149701	0	0	0	0	0	0	0.00034118	0	0.00312891	0	0.00112486	0	0.000596125	0	0	0.00044287	0.000954654	0.000412371	0.00990525	0.0251489	0.00789177	0.000599161	0
k__Bacteria;p__Proteobacteria;c__Gammaproteobacteria;o__Pasteurellales;f__Pasteurellaceae;g__Haemophilus;s__parainfluenzae	0.00725953	0.040636	0.0343296	0.152372	0.154804	0.114707	0.0590796	0.0247168	0.12069	0.172608	0.00129702	0.223054	0.00511322	0.058216	0.0136452	0.0621958	0.108318	0.121379	0.0573183	0.0459408	0.0513141	0.0803347	0.139483	0.171889	0.0357675	0.0172524	0.0245262	0.111603	0.00620525	0.168247	0.0956072	0.00860357	0.0631342	0.0533253	0.069317
k__Bacteria;p__Proteobacteria;c__Gammaproteobacteria;o__Pasteurellales;f__Pasteurellaceae;g__Haemophilus;s__pittmaniae	0	0	0	0	0	0.000409668	0.00559701	0	0	0	0	0	0	0	0	0	0	0	0	0	0	0	0	0	0	0	0	0	0	0.000412371	0	0	0.0011274	0.00239664	0
k__Bacteria;p__Proteobacteria;c__Gammaproteobacteria;o__Pasteurellales;f__Pasteurellaceae;g__Haemophilus;s__sp._Oral_Taxon_C82	0	0	0	0	0	0.000819336	0.00124378	0	0	0.00234522	0	0	0	0	0	0.00108167	0	0.00137931	0.00034118	0	0	0.114644	0	0	0.000894188	0	0.000557414	0	0	0.000824742	0	0	0.00450958	0	0
k__Bacteria;p__Proteobacteria;c__Gammaproteobacteria;o__Pasteurellales;f__Pasteurellaceae;g__Haemophilus;s__sp._oral_taxon_036	0	0	0	0	0	0	0	0.000514933	0	0	0	0	0	0	0	0	0	0	0	0	0	0	0	0	0	0	0	0	0	0	0	0	0	0	0
k__Bacteria;p__Proteobacteria;c__Gammaproteobacteria;o__Pasteurellales;f__Pasteurellaceae;g__Haemophilus;s__sp._oral_taxon_908	0	0	0	0	0	0	0	0	0	0	0	0	0	0	0	0	0	0	0	0	0.00125156	0	0	0	0	0	0	0	0	0	0	0	0.00169109	0	0
k__Bacteria;p__Proteobacteria;c__Gammaproteobacteria;o__Pasteurellales;f__Pasteurellaceae;g__Haemophilus;s__sputorum	0	0	0	0.000456204	0	0	0	0.000514933	0	0	0	0	0	0	0	0	0	0	0	0	0.00125156	0.00167364	0	0	0.000596125	0	0	0	0	0.00123711	0	0	0.00225479	0	0
k__Bacteria;p__Proteobacteria;c__Gammaproteobacteria;o__Pasteurellales;f__Pasteurellaceae;g__Pasteurella;s__multocida	0	0	0	0	0	0	0	0	0	0	0	0	0	0	0	0	0	0	0	0	0	0	0	0	0	0	0	0	0	0	0	0	0	0	0
k__Bacteria;p__Proteobacteria;c__Gammaproteobacteria;o__Pseudomonadales;f__Moraxellaceae;g__Moraxella;s__sp._Oral_Taxon_B07	0	0	0	0	0.000355872	0	0	0	0	0	0	0	0	0	0	0	0	0	0	0	0	0	0	0	0	0	0	0	0	0	0.0917313	0	0	0	0
k__Bacteria;p__Proteobacteria;c__Gammaproteobacteria;o__Pseudomonadales;f__Pseudomonadaceae;g__Pseudomonas;s__stutzeri	0	0	0	0	0	0	0	0	0	0.000469043	0	0	0	0	0	0	0	0	0	0	0	0	0	0	0	0	0	0	0	0	0	0	0	0	0
k__Bacteria;p__Proteobacteria;c__Gammaproteobacteria;o__Pseudomonadales;f__Pseudomonadaceae;g__Pseudomonas;s__veronii	0	0	0	0	0	0	0	0	0	0	0	0	0	0	0	0	0	0	0	0	0	0	0.00056243	0	0	0	0	0	0	0	0	0	0	0	0
k__Bacteria;p__Proteobacteria;c__Gammaproteobacteria;o__Xanthomonadales;f__Xanthomonadaceae;g__Vulcaniibacterium;s__thermophilum	0	0	0	0	0	0	0	0	0	0	0	0	0	0	0	0	0	0	0	0.000629327	0	0	0	0	0	0	0	0	0	0	0	0	0	0	0
k__Bacteria;p__SR1;c__SR1_[C-1];o__SR1_[O-1];f__SR1_[F-1];g__SR1_[G-1];s__sp._oral_taxon_345	0.00181488	0.00353357	0	0	0.00213523	0.00204834	0	0	0	0.00140713	0	0	0	0	0	0	0.000598444	0	0	0.00188798	0.00125156	0	0	0	0	0	0	0	0	0.000824742	0.00129199	0	0.000563698	0	0.000509684
k__Bacteria;p__SR1;c__SR1_[C-1];o__SR1_[O-1];f__SR1_[F-1];g__SR1_[G-1];s__sp._oral_taxon_874	0	0.00176678	0	0	0.00142349	0.00286768	0	0.000514933	0.000507099	0.000469043	0	0.00149701	0	0	0	0	0.000598444	0.000689655	0	0	0	0	0	0	0	0	0.000557414	0	0	0.000412371	0.00172265	0	0	0.00179748	0.00152905
k__Bacteria;p__SR1;c__SR1_[C-1];o__SR1_[O-1];f__SR1_[F-1];g__SR1_[G-1];s__sp._oral_taxon_875	0	0.00353357	0	0	0.00391459	0.0131094	0	0	0.0010142	0.000938086	0	0.00299401	0.00073046	0	0	0.0102758	0	0	0	0.000629327	0.00375469	0	0	0	0	0	0.00167224	0	0	0.000412371	0.00387597	0	0	0.000599161	0.00101937
k__Bacteria;p__Saccharibacteria(TM7);c__TM7_[C];o__TM7_[O];f__TM7_[F];g__TM7_[G];s__sp._Oral_Taxon_A56	0	0	0.00201939	0.000456204	0.00427046	0	0	0.00257467	0.0025355	0.000469043	0	0	0.00073046	0.0253521	0	0.00216333	0.05386	0.022069	0.0689185	0.000629327	0.00187735	0.00083682	0	0.0110599	0.0187779	0	0.000557414	0	0	0.000824742	0	0.000661813	0	0.00299581	0
k__Bacteria;p__Saccharibacteria_(TM7);c__TM7_[C-1];o__TM7_[O-1];f__TM7_[F-1];g__TM7_[G-1];s__sp._oral_taxon_346	0	0.00176678	0	0	0	0	0	0.0221421	0	0	0	0	0.00438276	0	0	0	0	0.000689655	0	0	0	0	0	0	0	0	0	0	0	0.000824742	0	0.00132363	0.0011274	0	0
k__Bacteria;p__Saccharibacteria_(TM7);c__TM7_[C-1];o__TM7_[O-1];f__TM7_[F-1];g__TM7_[G-1];s__sp._oral_taxon_347	0	0	0.000403877	0	0.00284698	0	0	0	0	0.000469043	0	0	0	0	0	0	0	0	0	0	0.000625782	0	0	0.000921659	0	0	0	0	0	0.0028866	0	0.00397088	0	0	0
k__Bacteria;p__Saccharibacteria_(TM7);c__TM7_[C-1];o__TM7_[O-1];f__TM7_[F-1];g__TM7_[G-1];s__sp._oral_taxon_348	0	0	0	0	0	0	0	0.00102987	0	0.00140713	0	0	0.00073046	0.0028169	0	0	0	0	0	0	0.00187735	0	0	0	0.000298063	0	0	0	0	0.000412371	0	0.00330907	0.000563698	0.000599161	0
k__Bacteria;p__Saccharibacteria_(TM7);c__TM7_[C-1];o__TM7_[O-1];f__TM7_[F-1];g__TM7_[G-1];s__sp._oral_taxon_349	0	0	0	0.000456204	0	0.000409668	0	0.0092688	0	0	0	0	0.00073046	0.000938967	0.000649773	0	0	0.000689655	0	0	0.00250313	0	0	0.000460829	0.000298063	0	0.00167224	0	0	0.000824742	0	0	0.000563698	0.000599161	0
k__Bacteria;p__Saccharibacteria_(TM7);c__TM7_[C-1];o__TM7_[O-1];f__TM7_[F-1];g__TM7_[G-1];s__sp._oral_taxon_352	0.00544465	0.0159011	0.00686591	0.0168796	0.0177936	0.00409668	0.016791	0.00978373	0.0015213	0.00281426	0.0226978	0.0344311	0	0.140845	0.071475	0.0216333	0.00837822	0.00137931	0.0839304	0.0566394	0.00563204	0.0041841	0.019685	0.00737327	0.0110283	0.0134185	0.00891862	0.110275	0	0.014433	0.0150732	0.0185308	0.00281849	0.0563212	0.0229358
k__Bacteria;p__Saccharibacteria_(TM7);c__TM7_[C-1];o__TM7_[O-1];f__TM7_[F-1];g__TM7_[G-1];s__sp._oral_taxon_488	0	0	0	0	0	0	0	0.000514933	0	0	0	0	0	0.000938967	0	0	0	0	0	0	0	0	0	0	0	0	0	0	0	0	0	0	0.0011274	0	0
k__Bacteria;p__Saccharibacteria_(TM7);c__TM7_[C-1];o__TM7_[O-1];f__TM7_[F-1];g__TM7_[G-1];s__sp._oral_taxon_869	0	0	0	0	0	0	0	0.000514933	0	0	0	0	0	0.000938967	0	0	0	0.000689655	0	0	0	0	0	0	0	0	0	0	0	0	0	0	0.000563698	0	0
k__Bacteria;p__Saccharibacteria_(TM7);c__TM7_[C-1];o__TM7_[O-1];f__TM7_[F-1];g__TM7_[G-1];s__sp._oral_taxon_952	0	0	0.00161551	0	0	0.000819336	0.000621891	0.00205973	0.000507099	0	0	0	0	0	0	0.000540833	0	0	0	0	0.00125156	0	0	0	0	0	0.000557414	0	0	0.000412371	0	0	0.00225479	0	0
k__Bacteria;p__Saccharibacteria_(TM7);c__TM7_[C-1];o__TM7_[O-1];f__TM7_[F-1];g__TM7_[G-2];s__sp._oral_taxon_350	0	0	0	0	0	0	0	0.0046344	0	0	0	0	0	0	0	0	0	0	0	0	0	0	0	0	0	0	0.000557414	0	0	0	0	0	0.0011274	0.000599161	0
k__Bacteria;p__Saccharibacteria_(TM7);c__TM7_[C-1];o__TM7_[O-1];f__TM7_[F-1];g__TM7_[G-3];s__sp._oral_taxon_351	0.00181488	0.00530035	0.00121163	0.00273723	0	0.00163867	0.0124378	0.00205973	0	0.000938086	0.00583658	0	0	0.0140845	0.00454841	0.00540833	0	0.00275862	0.000682361	0.00188798	0	0.00251046	0.00224972	0.00230415	0.000596125	0.00127796	0.00613155	0	0.000954654	0.00701031	0	0.00198544	0.0011274	0.00299581	0.00152905
k__Bacteria;p__Saccharibacteria_(TM7);c__TM7_[C-1];o__TM7_[O-1];f__TM7_[F-1];g__TM7_[G-4];s__sp._oral_taxon_355	0	0	0	0	0	0	0	0	0	0	0	0	0	0	0	0	0	0	0	0	0	0	0	0	0	0	0.000557414	0	0	0	0	0	0	0	0
k__Bacteria;p__Saccharibacteria_(TM7);c__TM7_[C-1];o__TM7_[O-1];f__TM7_[F-1];g__TM7_[G-6];s__sp._oral_taxon_870	0	0.00176678	0	0	0	0.0102417	0	0.00566426	0.00659229	0.00140713	0	0	0.00073046	0.000938967	0	0	0.000598444	0	0	0	0.00563204	0	0	0	0.000596125	0	0	0.00088574	0	0	0	0	0.00338219	0	0.00509684
k__Bacteria;p__Saccharibacteria_(TM7);c__TM7_[C-1];o__TM7_[O-1];f__TM7_[F-2];g__TM7_[G-5];s__sp._oral_taxon_356	0	0	0.000807754	0	0	0	0.000621891	0.0113285	0	0	0	0	0	0	0	0	0	0.00344828	0	0	0	0	0	0	0	0	0	0	0.000477327	0	0	0	0.000563698	0	0
k__Bacteria;p__Spirochaetes;c__Spirochaetia;o__Spirochaetales;f__Spirochaetaceae;g__Treponema;s__amylovorum	0	0	0	0	0	0	0	0	0	0	0	0	0	0	0	0.00378583	0	0	0	0	0	0	0	0	0	0	0	0	0	0	0	0	0	0	0
k__Bacteria;p__Spirochaetes;c__Spirochaetia;o__Spirochaetales;f__Spirochaetaceae;g__Treponema;s__denticola	0	0	0	0	0	0	0.000621891	0.0128733	0	0	0	0	0	0	0.000649773	0.0048675	0	0.00206897	0.00034118	0	0	0	0	0	0.000596125	0	0	0	0.00381862	0	0	0	0.000563698	0	0
k__Bacteria;p__Spirochaetes;c__Spirochaetia;o__Spirochaetales;f__Spirochaetaceae;g__Treponema;s__lecithinolyticum	0	0	0	0	0	0	0	0	0	0	0	0	0	0	0	0	0	0	0	0	0.000625782	0.00083682	0	0	0	0	0	0	0	0	0	0.000661813	0.000563698	0	0
k__Bacteria;p__Spirochaetes;c__Spirochaetia;o__Spirochaetales;f__Spirochaetaceae;g__Treponema;s__maltophilum	0	0	0	0	0	0	0	0	0	0	0	0	0	0	0	0	0	0	0	0	0	0	0	0	0	0	0	0	0.000477327	0	0	0	0	0	0
k__Bacteria;p__Spirochaetes;c__Spirochaetia;o__Spirochaetales;f__Spirochaetaceae;g__Treponema;s__medium	0	0.00176678	0	0	0	0	0	0.000514933	0	0	0	0	0	0	0	0	0	0.00137931	0	0	0	0	0	0	0	0	0.000557414	0	0	0	0	0	0	0	0
k__Bacteria;p__Spirochaetes;c__Spirochaetia;o__Spirochaetales;f__Spirochaetaceae;g__Treponema;s__parvum	0	0	0	0	0	0	0	0.000514933	0	0	0	0	0	0	0	0	0	0	0	0	0	0	0	0	0	0	0	0	0	0	0	0	0	0	0
k__Bacteria;p__Spirochaetes;c__Spirochaetia;o__Spirochaetales;f__Spirochaetaceae;g__Treponema;s__pectinovorum	0	0	0	0	0	0	0	0.00102987	0	0	0	0	0	0	0	0	0	0	0	0	0	0	0	0	0	0	0	0	0	0	0	0	0	0	0
k__Bacteria;p__Spirochaetes;c__Spirochaetia;o__Spirochaetales;f__Spirochaetaceae;g__Treponema;s__socranskii	0	0	0	0	0	0	0.000621891	0.00205973	0	0	0	0	0	0	0	0.000540833	0	0	0	0	0	0	0	0	0	0	0	0	0.000954654	0	0	0	0	0	0
k__Bacteria;p__Spirochaetes;c__Spirochaetia;o__Spirochaetales;f__Spirochaetaceae;g__Treponema;s__sp._oral_taxon_231	0	0	0	0	0	0	0.000621891	0	0	0	0	0	0	0.000938967	0	0.000540833	0	0	0	0	0	0.00083682	0	0	0	0	0	0	0	0	0	0	0	0	0
k__Bacteria;p__Spirochaetes;c__Spirochaetia;o__Spirochaetales;f__Spirochaetaceae;g__Treponema;s__sp._oral_taxon_234	0	0	0	0	0	0	0	0	0	0	0	0	0	0	0	0	0	0.000689655	0	0	0	0	0	0	0	0	0	0	0	0	0	0	0	0	0
k__Bacteria;p__Spirochaetes;c__Spirochaetia;o__Spirochaetales;f__Spirochaetaceae;g__Treponema;s__sp._oral_taxon_236	0	0	0	0	0	0	0	0	0	0	0	0	0	0	0	0	0	0	0	0	0	0	0	0	0	0	0	0.00044287	0	0	0	0	0	0	0
k__Bacteria;p__Spirochaetes;c__Spirochaetia;o__Spirochaetales;f__Spirochaetaceae;g__Treponema;s__sp._oral_taxon_237	0	0	0	0	0	0	0	0.0102987	0	0	0	0	0	0	0	0.0135208	0	0.00413793	0.00034118	0	0	0	0	0	0	0	0	0	0	0	0	0	0.00225479	0	0
k__Bacteria;p__Spirochaetes;c__Spirochaetia;o__Spirochaetales;f__Spirochaetaceae;g__Treponema;s__sp._oral_taxon_253	0	0	0	0	0	0	0	0	0	0	0	0	0	0	0	0	0	0	0	0	0	0	0	0	0	0	0	0	0	0	0	0.000661813	0	0	0
k__Bacteria;p__Spirochaetes;c__Spirochaetia;o__Spirochaetales;f__Spirochaetaceae;g__Treponema;s__sp._oral_taxon_256	0	0	0	0	0	0	0	0	0	0	0	0	0	0	0	0	0	0.000689655	0	0	0	0	0	0	0	0	0	0	0	0	0	0	0.000563698	0	0
k__Bacteria;p__Spirochaetes;c__Spirochaetia;o__Spirochaetales;f__Spirochaetaceae;g__Treponema;s__sp._oral_taxon_257	0	0	0	0	0.000355872	0	0	0.00102987	0	0	0	0	0	0	0	0	0	0	0	0	0	0	0	0	0	0	0	0	0.00238663	0	0	0	0.000563698	0	0
k__Bacteria;p__Spirochaetes;c__Spirochaetia;o__Spirochaetales;f__Spirochaetaceae;g__Treponema;s__sp._oral_taxon_270	0	0	0	0	0	0	0	0.000514933	0	0	0	0	0	0	0	0	0	0	0	0	0	0	0	0	0	0	0	0	0	0	0	0	0	0	0
k__Bacteria;p__Spirochaetes;c__Spirochaetia;o__Spirochaetales;f__Spirochaetaceae;g__Treponema;s__vincentii	0	0	0	0	0	0	0	0	0	0	0	0	0	0	0	0	0	0	0	0	0	0	0	0	0	0	0	0	0	0	0.000430663	0.000661813	0	0	0
k__Bacteria;p__Synergistetes;c__Synergistia;o__Synergistales;f__Dethiosulfovibrionaceae;g__Pyramidobacter;s__piscolens	0	0	0	0	0	0	0	0	0	0	0	0	0	0	0	0	0	0	0	0	0	0	0	0	0	0	0	0	0	0	0	0	0	0	0
k__Bacteria;p__Synergistetes;c__Synergistia;o__Synergistales;f__Synergistaceae;g__Fretibacterium;s__fastidiosum	0	0	0	0	0	0	0.000621891	0.000514933	0	0	0.00194553	0	0	0	0	0.00108167	0	0.00275862	0	0	0	0	0	0	0	0	0.00111483	0	0.00190931	0	0	0.000661813	0.000563698	0	0
k__Bacteria;p__Synergistetes;c__Synergistia;o__Synergistales;f__Synergistaceae;g__Fretibacterium;s__multispecies_spp26_2	0	0	0	0	0	0	0	0	0	0	0	0	0	0	0	0	0	0	0	0	0	0	0	0	0	0	0	0	0.000954654	0	0	0	0	0	0
k__Bacteria;p__Synergistetes;c__Synergistia;o__Synergistales;f__Synergistaceae;g__Fretibacterium;s__sp._oral_taxon_358	0	0	0	0	0	0	0	0.000514933	0	0	0	0	0	0	0	0.000540833	0	0	0	0	0	0	0	0	0	0	0	0	0	0	0	0	0	0	0
k__Bacteria;p__Synergistetes;c__Synergistia;o__Synergistales;f__Synergistaceae;g__Fretibacterium;s__sp._oral_taxon_359	0	0	0	0	0	0	0	0.00102987	0.000507099	0.000469043	0	0	0	0	0	0.000540833	0	0.00137931	0	0	0.000625782	0	0	0	0	0	0	0	0.00238663	0	0	0	0	0	0
k__Bacteria;p__Synergistetes;c__Synergistia;o__Synergistales;f__Synergistaceae;g__Fretibacterium;s__sp._oral_taxon_360	0	0	0	0	0	0	0	0.0015448	0	0	0.00129702	0	0	0	0	0	0	0.000689655	0	0	0	0	0	0	0	0	0	0	0.00190931	0	0	0.000661813	0	0	0
k__Bacteria;p__Synergistetes;c__Synergistia;o__Synergistales;f__Synergistaceae;g__Fretibacterium;s__sp._oral_taxon_361	0	0	0	0	0	0	0	0	0	0	0	0	0	0	0	0	0	0	0	0	0	0	0	0	0	0	0.000557414	0	0	0	0	0	0	0	0
k__Bacteria;p__Synergistetes;c__Synergistia;o__Synergistales;f__Synergistaceae;g__Fretibacterium;s__sp._oral_taxon_362	0	0	0	0	0	0	0	0	0	0	0	0	0	0	0	0	0	0.000689655	0	0	0	0	0	0	0	0	0	0	0	0	0	0.000661813	0	0	0
k__Bacteria;p__multiphylum;c__multiclass;o__multiorder;f__'Fusobacteriaceae';g__Fusobacterium;s__multispecies_spp10_5	0	0	0	0	0	0	0	0	0	0	0	0	0.00073046	0	0.00129955	0	0	0	0	0	0.000625782	0	0	0	0	0	0	0	0	0	0	0.00132363	0	0	0
k__Plantae;p__Angiosperms;c__Magnoliids;o__Laurales;f__Calycanthaceae;g__Calycanthus;s__floridus_Oral_Taxon_D07	0	0	0	0	0	0	0	0	0	0	0	0	0	0	0	0	0.000598444	0	0	0	0	0	0	0.000921659	0	0	0	0	0	0	0	0	0	0	0
# column sums are normalized to 1.

## Sheet: Table S3_Core Species
Core Species across 50 % of samples.													Core Species across 80 % of samples.													Core Species across 95 % of samples.
['k__Bacteria', 'p__Actinobacteria', 'c__Actinobacteria', 'o__Actinomycetales', 'f__Actinomycetaceae', 'g__Actinomyces', 's__graevenitzii']													['k__Bacteria', 'p__Actinobacteria', 'c__Actinobacteria', 'o__Actinomycetales', 'f__Actinomycetaceae', 'g__Actinomyces', 's__lingnae_[NVP]']													['k__Bacteria', 'p__Actinobacteria', 'c__Actinobacteria', 'o__Actinomycetales', 'f__Micrococcaceae', 'g__Rothia', 's__mucilaginosa']
['k__Bacteria', 'p__Actinobacteria', 'c__Actinobacteria', 'o__Actinomycetales', 'f__Actinomycetaceae', 'g__Actinomyces', 's__lingnae_[NVP]']													['k__Bacteria', 'p__Actinobacteria', 'c__Actinobacteria', 'o__Actinomycetales', 'f__Actinomycetaceae', 'g__Actinomyces', 's__odontolyticus']													['k__Bacteria', 'p__Bacteroidetes', 'c__Bacteroidia', 'o__Bacteroidales', 'f__Prevotellaceae', 'g__Prevotella', 's__melaninogenica']
['k__Bacteria', 'p__Actinobacteria', 'c__Actinobacteria', 'o__Actinomycetales', 'f__Actinomycetaceae', 'g__Actinomyces', 's__odontolyticus']													['k__Bacteria', 'p__Actinobacteria', 'c__Actinobacteria', 'o__Actinomycetales', 'f__Micrococcaceae', 'g__Rothia', 's__aeria']													['k__Bacteria', 'p__Firmicutes', 'c__Bacilli', 'o__Lactobacillales', 'f__Streptococcaceae', 'g__Streptococcus', 's__multispecies_spp24_14']
['k__Bacteria', 'p__Actinobacteria', 'c__Actinobacteria', 'o__Actinomycetales', 'f__Actinomycetaceae', 'g__Actinomyces', 's__sp._oral_taxon_172']													['k__Bacteria', 'p__Actinobacteria', 'c__Actinobacteria', 'o__Actinomycetales', 'f__Micrococcaceae', 'g__Rothia', 's__mucilaginosa']													['k__Bacteria', 'p__Firmicutes', 'c__Negativicutes', 'o__Selenomonadales', 'f__Veillonellaceae', 'g__Veillonella', 's__parvula']
['k__Bacteria', 'p__Actinobacteria', 'c__Actinobacteria', 'o__Actinomycetales', 'f__Micrococcaceae', 'g__Rothia', 's__aeria']													['k__Bacteria', 'p__Bacteroidetes', 'c__Bacteroidia', 'o__Bacteroidales', 'f__Porphyromonadaceae', 'g__Porphyromonas', 's__pasteri']													['k__Bacteria', 'p__Proteobacteria', 'c__Gammaproteobacteria', 'o__Pasteurellales', 'f__Pasteurellaceae', 'g__Haemophilus', 's__parainfluenzae']
['k__Bacteria', 'p__Actinobacteria', 'c__Actinobacteria', 'o__Actinomycetales', 'f__Micrococcaceae', 'g__Rothia', 's__dentocariosa']													['k__Bacteria', 'p__Bacteroidetes', 'c__Bacteroidia', 'o__Bacteroidales', 'f__Prevotellaceae', 'g__Prevotella', 's__melaninogenica']
['k__Bacteria', 'p__Actinobacteria', 'c__Actinobacteria', 'o__Actinomycetales', 'f__Micrococcaceae', 'g__Rothia', 's__mucilaginosa']													['k__Bacteria', 'p__Bacteroidetes', 'c__Bacteroidia', 'o__Bacteroidales', 'f__Prevotellaceae', 'g__Prevotella', 's__nanceiensis']
['k__Bacteria', 'p__Actinobacteria', 'c__Actinobacteria', 'o__Corynebacteriales', 'f__Corynebacteriaceae', 'g__Corynebacterium', 's__matruchotii']													['k__Bacteria', 'p__Bacteroidetes', 'c__Bacteroidia', 'o__Bacteroidales', 'f__Prevotellaceae', 'g__Prevotella', 's__pallens']
['k__Bacteria', 'p__Actinobacteria', 'c__Coriobacteriia', 'o__Coriobacteriales', 'f__Coriobacteriaceae', 'g__Atopobium', 's__parvulum']													['k__Bacteria', 'p__Firmicutes', 'c__Bacilli', 'o__Bacillales', 'f__Gemellaceae', 'g__Gemella', 's__sanguinis']
['k__Bacteria', 'p__Bacteroidetes', 'c__Bacteroidia', 'o__Bacteroidales', 'f__Porphyromonadaceae', 'g__Porphyromonas', 's__pasteri']													['k__Bacteria', 'p__Firmicutes', 'c__Bacilli', 'o__Lactobacillales', 'f__Carnobacteriaceae', 'g__Granulicatella', 's__multispecies_spp49_2']
['k__Bacteria', 'p__Bacteroidetes', 'c__Bacteroidia', 'o__Bacteroidales', 'f__Prevotellaceae', 'g__Alloprevotella', 's__sp._oral_taxon_308']													['k__Bacteria', 'p__Firmicutes', 'c__Bacilli', 'o__Lactobacillales', 'f__Streptococcaceae', 'g__Streptococcus', 's__cristatus']
['k__Bacteria', 'p__Bacteroidetes', 'c__Bacteroidia', 'o__Bacteroidales', 'f__Prevotellaceae', 'g__Alloprevotella', 's__sp._oral_taxon_914']													['k__Bacteria', 'p__Firmicutes', 'c__Bacilli', 'o__Lactobacillales', 'f__Streptococcaceae', 'g__Streptococcus', 's__multispecies_spp1_2']
['k__Bacteria', 'p__Bacteroidetes', 'c__Bacteroidia', 'o__Bacteroidales', 'f__Prevotellaceae', 'g__Prevotella', 's__histicola']													['k__Bacteria', 'p__Firmicutes', 'c__Bacilli', 'o__Lactobacillales', 'f__Streptococcaceae', 'g__Streptococcus', 's__multispecies_spp24_14']
['k__Bacteria', 'p__Bacteroidetes', 'c__Bacteroidia', 'o__Bacteroidales', 'f__Prevotellaceae', 'g__Prevotella', 's__intermedia']													['k__Bacteria', 'p__Firmicutes', 'c__Bacilli', 'o__Lactobacillales', 'f__Streptococcaceae', 'g__Streptococcus', 's__multispecies_spp32_2']
['k__Bacteria', 'p__Bacteroidetes', 'c__Bacteroidia', 'o__Bacteroidales', 'f__Prevotellaceae', 'g__Prevotella', 's__melaninogenica']													['k__Bacteria', 'p__Firmicutes', 'c__Bacilli', 'o__Lactobacillales', 'f__Streptococcaceae', 'g__Streptococcus', 's__sanguinis']
['k__Bacteria', 'p__Bacteroidetes', 'c__Bacteroidia', 'o__Bacteroidales', 'f__Prevotellaceae', 'g__Prevotella', 's__multispecies_spp5_2']													['k__Bacteria', 'p__Firmicutes', 'c__Clostridia', 'o__Clostridiales', 'f__Lachnospiraceae_[XIV]', 'g__Oribacterium', 's__sinus']
['k__Bacteria', 'p__Bacteroidetes', 'c__Bacteroidia', 'o__Bacteroidales', 'f__Prevotellaceae', 'g__Prevotella', 's__nanceiensis']													['k__Bacteria', 'p__Firmicutes', 'c__Negativicutes', 'o__Selenomonadales', 'f__Veillonellaceae', 'g__Veillonella', 's__multispecies_spp29_2']
['k__Bacteria', 'p__Bacteroidetes', 'c__Bacteroidia', 'o__Bacteroidales', 'f__Prevotellaceae', 'g__Prevotella', 's__oris']													['k__Bacteria', 'p__Firmicutes', 'c__Negativicutes', 'o__Selenomonadales', 'f__Veillonellaceae', 'g__Veillonella', 's__parvula']
['k__Bacteria', 'p__Bacteroidetes', 'c__Bacteroidia', 'o__Bacteroidales', 'f__Prevotellaceae', 'g__Prevotella', 's__pallens']													['k__Bacteria', 'p__Firmicutes', 'c__Negativicutes', 'o__Selenomonadales', 'f__Veillonellaceae', 'g__Veillonella', 's__rogosae']
['k__Bacteria', 'p__Bacteroidetes', 'c__Bacteroidia', 'o__Bacteroidales', 'f__Prevotellaceae', 'g__Prevotella', 's__salivae']													['k__Bacteria', 'p__Fusobacteria', 'c__Fusobacteriia', 'o__Fusobacteriales', 'f__Fusobacteriaceae', 'g__Fusobacterium', 's__periodonticum']
['k__Bacteria', 'p__Bacteroidetes', 'c__Bacteroidia', 'o__Bacteroidales', 'f__Prevotellaceae', 'g__Prevotella', 's__shahii']													['k__Bacteria', 'p__Fusobacteria', 'c__Fusobacteriia', 'o__Fusobacteriales', 'f__Leptotrichiaceae', 'g__Leptotrichia', 's__sp._oral_taxon_417']
['k__Bacteria', 'p__Bacteroidetes', 'c__Bacteroidia', 'o__Bacteroidales', 'f__Prevotellaceae', 'g__Prevotella', 's__sp._oral_taxon_306']													['k__Bacteria', 'p__Proteobacteria', 'c__Betaproteobacteria', 'o__Burkholderiales', 'f__Burkholderiaceae', 'g__Lautropia', 's__mirabilis']
['k__Bacteria', 'p__Bacteroidetes', 'c__Bacteroidia', 'o__Bacteroidales', 'f__Prevotellaceae', 'g__Prevotella', 's__sp._oral_taxon_314']													['k__Bacteria', 'p__Proteobacteria', 'c__Betaproteobacteria', 'o__Neisseriales', 'f__Neisseriaceae', 'g__Neisseria', 's__subflava']
['k__Bacteria', 'p__Bacteroidetes', 'c__Flavobacteriia', 'o__Flavobacteriales', 'f__Flavobacteriaceae', 'g__Bergeyella', 's__sp._oral_taxon_322']													['k__Bacteria', 'p__Proteobacteria', 'c__Epsilonproteobacteria', 'o__Campylobacterales', 'f__Campylobacteraceae', 'g__Campylobacter', 's__concisus']
['k__Bacteria', 'p__Bacteroidetes', 'c__Flavobacteriia', 'o__Flavobacteriales', 'f__Flavobacteriaceae', 'g__Capnocytophaga', 's__gingivalis']													['k__Bacteria', 'p__Proteobacteria', 'c__Gammaproteobacteria', 'o__Pasteurellales', 'f__Pasteurellaceae', 'g__Haemophilus', 's__parainfluenzae']
['k__Bacteria', 'p__Bacteroidetes', 'c__Flavobacteriia', 'o__Flavobacteriales', 'f__Flavobacteriaceae', 'g__Capnocytophaga', 's__granulosa']													['k__Bacteria', 'p__Saccharibacteria_(TM7)', 'c__TM7_[C-1]', 'o__TM7_[O-1]', 'f__TM7_[F-1]', 'g__TM7_[G-1]', 's__sp._oral_taxon_352']
['k__Bacteria', 'p__Bacteroidetes', 'c__Flavobacteriia', 'o__Flavobacteriales', 'f__Flavobacteriaceae', 'g__Capnocytophaga', 's__leadbetteri']
['k__Bacteria', 'p__Bacteroidetes', 'c__Flavobacteriia', 'o__Flavobacteriales', 'f__Flavobacteriaceae', 'g__Capnocytophaga', 's__sputigena']
['k__Bacteria', 'p__Firmicutes', 'c__Bacilli', 'o__Bacillales', 'f__Gemellaceae', 'g__Gemella', 's__multispecies_spp51_2']
['k__Bacteria', 'p__Firmicutes', 'c__Bacilli', 'o__Bacillales', 'f__Gemellaceae', 'g__Gemella', 's__sanguinis']
['k__Bacteria', 'p__Firmicutes', 'c__Bacilli', 'o__Lactobacillales', 'f__Carnobacteriaceae', 'g__Granulicatella', 's__multispecies_spp49_2']
['k__Bacteria', 'p__Firmicutes', 'c__Bacilli', 'o__Lactobacillales', 'f__Streptococcaceae', 'g__Streptococcus', 's__cristatus']
['k__Bacteria', 'p__Firmicutes', 'c__Bacilli', 'o__Lactobacillales', 'f__Streptococcaceae', 'g__Streptococcus', 's__gordonii']
['k__Bacteria', 'p__Firmicutes', 'c__Bacilli', 'o__Lactobacillales', 'f__Streptococcaceae', 'g__Streptococcus', 's__lactarius']
['k__Bacteria', 'p__Firmicutes', 'c__Bacilli', 'o__Lactobacillales', 'f__Streptococcaceae', 'g__Streptococcus', 's__multispecies_spp1_2']
['k__Bacteria', 'p__Firmicutes', 'c__Bacilli', 'o__Lactobacillales', 'f__Streptococcaceae', 'g__Streptococcus', 's__multispecies_spp12_3']
['k__Bacteria', 'p__Firmicutes', 'c__Bacilli', 'o__Lactobacillales', 'f__Streptococcaceae', 'g__Streptococcus', 's__multispecies_spp24_14']
['k__Bacteria', 'p__Firmicutes', 'c__Bacilli', 'o__Lactobacillales', 'f__Streptococcaceae', 'g__Streptococcus', 's__multispecies_spp32_2']
['k__Bacteria', 'p__Firmicutes', 'c__Bacilli', 'o__Lactobacillales', 'f__Streptococcaceae', 'g__Streptococcus', 's__multispecies_spp33_2']
['k__Bacteria', 'p__Firmicutes', 'c__Bacilli', 'o__Lactobacillales', 'f__Streptococcaceae', 'g__Streptococcus', 's__multispecies_spp40_2']
['k__Bacteria', 'p__Firmicutes', 'c__Bacilli', 'o__Lactobacillales', 'f__Streptococcaceae', 'g__Streptococcus', 's__multispecies_spp41_3']
['k__Bacteria', 'p__Firmicutes', 'c__Bacilli', 'o__Lactobacillales', 'f__Streptococcaceae', 'g__Streptococcus', 's__sanguinis']
['k__Bacteria', 'p__Firmicutes', 'c__Clostridia', 'o__Clostridiales', 'f__Lachnospiraceae_[XIV]', 'g__Catonella', 's__morbi']
['k__Bacteria', 'p__Firmicutes', 'c__Clostridia', 'o__Clostridiales', 'f__Lachnospiraceae_[XIV]', 'g__Lachnoanaerobaculum', 's__orale']
['k__Bacteria', 'p__Firmicutes', 'c__Clostridia', 'o__Clostridiales', 'f__Lachnospiraceae_[XIV]', 'g__Lachnoanaerobaculum', 's__umeaense']
['k__Bacteria', 'p__Firmicutes', 'c__Clostridia', 'o__Clostridiales', 'f__Lachnospiraceae_[XIV]', 'g__Oribacterium', 's__asaccharolyticum']
['k__Bacteria', 'p__Firmicutes', 'c__Clostridia', 'o__Clostridiales', 'f__Lachnospiraceae_[XIV]', 'g__Oribacterium', 's__parvum']
['k__Bacteria', 'p__Firmicutes', 'c__Clostridia', 'o__Clostridiales', 'f__Lachnospiraceae_[XIV]', 'g__Oribacterium', 's__sinus']
['k__Bacteria', 'p__Firmicutes', 'c__Clostridia', 'o__Clostridiales', 'f__Lachnospiraceae_[XIV]', 'g__Stomatobaculum', 's__sp._oral_taxon_097']
['k__Bacteria', 'p__Firmicutes', 'c__Clostridia', 'o__Clostridiales', 'f__Peptostreptococcaceae_[XI]', 'g__Filifactor', 's__alocis']
['k__Bacteria', 'p__Firmicutes', 'c__Clostridia', 'o__Clostridiales', 'f__Peptostreptococcaceae_[XI]', 'g__Peptostreptococcus', 's__stomatis']
['k__Bacteria', 'p__Firmicutes', 'c__Clostridia', 'o__Clostridiales', 'f__Ruminococcaceae', 'g__Ruminococcaceae_[G-1]', 's__sp._oral_taxon_075']
['k__Bacteria', 'p__Firmicutes', 'c__Clostridia', 'o__Clostridiales', 'f__Ruminococcaceae', 'g__Ruminococcaceae_[G-2]', 's__sp._oral_taxon_085']
['k__Bacteria', 'p__Firmicutes', 'c__Negativicutes', 'o__Selenomonadales', 'f__Veillonellaceae', 'g__Megasphaera', 's__micronuciformis']
['k__Bacteria', 'p__Firmicutes', 'c__Negativicutes', 'o__Selenomonadales', 'f__Veillonellaceae', 'g__Veillonella', 's__atypica']
['k__Bacteria', 'p__Firmicutes', 'c__Negativicutes', 'o__Selenomonadales', 'f__Veillonellaceae', 'g__Veillonella', 's__multispecies_spp27_2']
['k__Bacteria', 'p__Firmicutes', 'c__Negativicutes', 'o__Selenomonadales', 'f__Veillonellaceae', 'g__Veillonella', 's__multispecies_spp29_2']
['k__Bacteria', 'p__Firmicutes', 'c__Negativicutes', 'o__Selenomonadales', 'f__Veillonellaceae', 'g__Veillonella', 's__parvula']
['k__Bacteria', 'p__Firmicutes', 'c__Negativicutes', 'o__Selenomonadales', 'f__Veillonellaceae', 'g__Veillonella', 's__rogosae']
['k__Bacteria', 'p__Fusobacteria', 'c__Fusobacteriia', 'o__Fusobacteriales', 'f__Fusobacteriaceae', 'g__Fusobacterium', 's__nucleatum']
['k__Bacteria', 'p__Fusobacteria', 'c__Fusobacteriia', 'o__Fusobacteriales', 'f__Fusobacteriaceae', 'g__Fusobacterium', 's__periodonticum']
['k__Bacteria', 'p__Fusobacteria', 'c__Fusobacteriia', 'o__Fusobacteriales', 'f__Leptotrichiaceae', 'g__Leptotrichia', 's__buccalis']
['k__Bacteria', 'p__Fusobacteria', 'c__Fusobacteriia', 'o__Fusobacteriales', 'f__Leptotrichiaceae', 'g__Leptotrichia', 's__sp._oral_taxon_212']
['k__Bacteria', 'p__Fusobacteria', 'c__Fusobacteriia', 'o__Fusobacteriales', 'f__Leptotrichiaceae', 'g__Leptotrichia', 's__sp._oral_taxon_215']
['k__Bacteria', 'p__Fusobacteria', 'c__Fusobacteriia', 'o__Fusobacteriales', 'f__Leptotrichiaceae', 'g__Leptotrichia', 's__sp._oral_taxon_221']
['k__Bacteria', 'p__Fusobacteria', 'c__Fusobacteriia', 'o__Fusobacteriales', 'f__Leptotrichiaceae', 'g__Leptotrichia', 's__sp._oral_taxon_417']
['k__Bacteria', 'p__Proteobacteria', 'c__Betaproteobacteria', 'o__Burkholderiales', 'f__Burkholderiaceae', 'g__Lautropia', 's__mirabilis']
['k__Bacteria', 'p__Proteobacteria', 'c__Betaproteobacteria', 'o__Neisseriales', 'f__Neisseriaceae', 'g__Neisseria', 's__elongata']
['k__Bacteria', 'p__Proteobacteria', 'c__Betaproteobacteria', 'o__Neisseriales', 'f__Neisseriaceae', 'g__Neisseria', 's__multispecies_spp38_2']
['k__Bacteria', 'p__Proteobacteria', 'c__Betaproteobacteria', 'o__Neisseriales', 'f__Neisseriaceae', 'g__Neisseria', 's__multispecies_spp42_4']
['k__Bacteria', 'p__Proteobacteria', 'c__Betaproteobacteria', 'o__Neisseriales', 'f__Neisseriaceae', 'g__Neisseria', 's__subflava']
['k__Bacteria', 'p__Proteobacteria', 'c__Epsilonproteobacteria', 'o__Campylobacterales', 'f__Campylobacteraceae', 'g__Campylobacter', 's__concisus']
['k__Bacteria', 'p__Proteobacteria', 'c__Gammaproteobacteria', 'o__Pasteurellales', 'f__Pasteurellaceae', 'g__Haemophilus', 's__parainfluenzae']
['k__Bacteria', 'p__Saccharibacteria_(TM7)', 'c__TM7_[C-1]', 'o__TM7_[O-1]', 'f__TM7_[F-1]', 'g__TM7_[G-1]', 's__sp._oral_taxon_352']
['k__Bacteria', 'p__Saccharibacteria_(TM7)', 'c__TM7_[C-1]', 'o__TM7_[O-1]', 'f__TM7_[F-1]', 'g__TM7_[G-3]', 's__sp._oral_taxon_351']
['k__Bacteria', 'p__Saccharibacteria(TM7)', 'c__TM7_[C]', 'o__TM7_[O]', 'f__TM7_[F]', 'g__TM7_[G]', 's__sp._Oral_Taxon_A56']

## Sheet: Table S4_Alpha Diversity
Table S4- Summary of Linear Regression for Alpha Diversity Measures
Predictors= Age, Gender (reference level=Female), BOP, Periodontal Status (reference level=H)
Diversity Metric	Observed Species			Chao 1				ACE					Shannon					Simpson						Inverse Simpson						Fisher
	Residuals:			Residuals:				Residuals:					Residuals:					Residuals:						Residuals:						Residuals:
	Min 1Q Median 3Q Max			Min 1Q Median 3Q Max				Min 1Q Median 3Q Max					Min 1Q Median 3Q Max					Min 1Q Median 3Q Max						Min 1Q Median 3Q Max						Min 1Q Median 3Q Max
	-51.297 -19.114 0.461 13.415 96.121			-62.790 -27.894 -8.338 18.345 121.965				-56.821 -26.683 -4.047 17.766 121.447					-1.14297 -0.24637 0.04101 0.24903 1.26866					-0.19353 -0.01620 0.01641 0.04303 0.09076						-10.518 -3.416 -1.915 2.414 28.804						-15.1359 -5.5368 -0.5257 4.3519 30.2393
	Coefficients:			Coefficients:				Coefficients:					Coefficients:					Coefficients:						Coefficients:						Coefficients:
	Estimate Std. Error t value Pr(>|t|)			Estimate Std. Error t value Pr(>|t|)				Estimate Std. Error t value Pr(>|t|)					Estimate Std. Error t value Pr(>|t|)					Estimate Std. Error t value Pr(>|t|)						Estimate Std. Error t value Pr(>|t|)						Estimate Std. Error t value Pr(>|t|)
	(Intercept) 99.5846 23.2130 4.290 0.000171 ***			(Intercept) 140.0908 34.6128 4.047 0.000335 ***				(Intercept) 133.2270 32.1430 4.145 0.000256 ***					(Intercept) 3.1344468 0.3886213 8.066 5.29e-09 ***					(Intercept) 0.8729534 0.0526036 16.595 <2e-16 ***						(Intercept) 15.22502 5.97478 2.548 0.0162 *						(Intercept) 26.47973 7.15060 3.703 0.000857 ***
	PerioP 1.1152 12.0470 0.093 0.926863			PerioP -2.7214 17.9632 -0.151 0.880598				PerioP -8.6613 16.6814 -0.519 0.607419					PerioP -0.1286139 0.2016850 -0.638 0.529					PerioP -0.0095786 0.0273000 -0.351 0.728						PerioP -2.26963 3.10077 -0.732 0.4699						PerioP -1.53118 3.71099 -0.413 0.682828
	SexM 7.9253 11.8646 0.668 0.509251			SexM 7.3058 17.6912 0.413 0.682570				SexM 4.4895 16.4288 0.273 0.786517					SexM 0.1317847 0.1986309 0.663 0.512					SexM 0.0216860 0.0268866 0.807 0.426						SexM 1.27229 3.05381 0.417 0.6799						SexM 1.46855 3.65479 0.402 0.690669
	Age -0.1920 0.4466 -0.430 0.670376			Age -0.2361 0.6659 -0.355 0.725405				Age -0.0358 0.6184 -0.058 0.954211					Age -0.0018103 0.0074762 -0.242 0.810					Age 0.0002902 0.0010120 0.287 0.776						Age -0.03798 0.11494 -0.330 0.7434						Age -0.07509 0.13756 -0.546 0.589175
	BOP -0.1751 0.3188 -0.549 0.587032			BOP -0.3651 0.4754 -0.768 0.448469				BOP -0.3672 0.4415 -0.832 0.412182					BOP -0.0008874 0.0053379 -0.166 0.869					BOP -0.0001622 0.0007225 -0.224 0.824						BOP -0.03367 0.08207 -0.410 0.6845						BOP -0.05588 0.09822 -0.569 0.573658
	---			---				---					---					---						---						---
	Signif. codes: 0 ‘***’ 0.001 ‘**’ 0.01 ‘*’ 0.05 ‘.’ 0.1 ‘ ’ 1			Signif. codes: 0 ‘***’ 0.001 ‘**’ 0.01 ‘*’ 0.05 ‘.’ 0.1 ‘ ’ 1				Signif. codes: 0 ‘***’ 0.001 ‘**’ 0.01 ‘*’ 0.05 ‘.’ 0.1 ‘ ’ 1					Signif. codes: 0 ‘***’ 0.001 ‘**’ 0.01 ‘*’ 0.05 ‘.’ 0.1 ‘ ’ 1					Signif. codes: 0 ‘***’ 0.001 ‘**’ 0.01 ‘*’ 0.05 ‘.’ 0.1 ‘ ’ 1						Signif. codes: 0 ‘***’ 0.001 ‘**’ 0.01 ‘*’ 0.05 ‘.’ 0.1 ‘ ’ 1						Signif. codes: 0 ‘***’ 0.001 ‘**’ 0.01 ‘*’ 0.05 ‘.’ 0.1 ‘ ’ 1
	Residual standard error: 30.37 on 30 degrees of freedom			Residual standard error: 45.28 on 30 degrees of freedom				Residual standard error: 42.05 on 30 degrees of freedom					Residual standard error: 0.5084 on 30 degrees of freedom					Residual standard error: 0.06882 on 30 degrees of freedom						Residual standard error: 7.817 on 30 degrees of freedom						Residual standard error: 9.355 on 30 degrees of freedom
	Multiple R-squared: 0.03177	Adjusted R-squared: -0.09733		Multiple R-squared: 0.03477	Adjusted R-squared: -0.09392			Multiple R-squared: 0.0409	Adjusted R-squared: -0.08698				Multiple R-squared: 0.04165	Adjusted R-squared: -0.08613				Multiple R-squared: 0.03056		Adjusted R-squared: -0.0987				Multiple R-squared: 0.04964		Adjusted R-squared: -0.07707				Multiple R-squared: 0.0455		Adjusted R-squared: -0.08176
	F-statistic: 0.2461 on 4 and 30 DF	p-value: 0.9098		F-statistic: 0.2702 on 4 and 30 DF	p-value: 0.8948			F-statistic: 0.3199 on 4 and 30 DF	p-value: 0.8624				F-statistic: 0.3259 on 4 and 30 DF	p-value: 0.8583				F-statistic: 0.2364 on 4 and 30 DF	p-value: 0.9156					F-statistic: 0.3918 on 4 and 30 DF	p-value: 0.8129					F-statistic: 0.3576 on 4 and 30 DF	p-value: 0.8367

## Sheet: Table S5-DeSeq2 Species.Details
Table S5- Differential abundance of species between P and H groups #	Significant difference							Differential abundance of species between Males and Females #								Differential abundance of species between Age groups (>50 versus ≤ 50years) #								Differential abundance of species between BOP categories ( >30% versus ≤ 30 %) #
Species	base Mean	log 2 Fold Change (P vs H)	Se of log 2 Fold Change	Test statistic	p-value	Adjusted P value		Species	base Mean	log 2 Fold Change (P vs H)	Se of log 2 Fold Change	Test statistic	p-value	Adjusted P value		Species	base Mean	log 2 Fold Change (P vs H)	Se of log 2 Fold Change	Test statistic	p-value	Adjusted P value		Species	base Mean	log 2 Fold Change (P vs H)	Se of log 2 Fold Change	Test statistic	p-value	Adjusted P value
k__Bacteria; p__Spirochaetes; c__Spirochaetia; o__Spirochaetales; f__Spirochaetaceae; g__Treponema; s__sp._oral_taxon_237	2.7113	1.6836	0.405893	4.14791	3.36e-05	0.00398872		k__Bacteria; p__Bacteroidetes; c__Flavobacteria; o__Flavobacteriales; f__Flavobacteriaceae; g__Capnocytophaga; s__sp._Oral_Taxon_A48	1.9704	1.54246	0.418233	3.68803	0.000225994	0.0944654		k__Bacteria; p__Proteobacteria; c__Betaproteobacteria; o__Burkholderiales; f__Comamonadaceae; g__Ottowia; s__sp._oral_taxon_894	2.61069	-1.25629	0.386589	-3.24968	0.00115534	0.404123		k__Bacteria; p__Fusobacteria; c__Fusobacteriia; o__Fusobacteriales; f__Fusobacteriaceae; g__Fusobacterium; s__multispecies_spp48_2	3.30875	2.31778	0.486062	4.76848	1.85622e-06	0.000369387
k__Bacteria; p__Saccharibacteria(TM7); c__TM7_[C]; o__TM7_[O]; f__TM7_[F]; g__TM7_[G]; s__sp._Oral_Taxon_A56	15.7131	1.80206	0.449638	4.0078	6.13e-05	0.00398872		k__Bacteria; p__Proteobacteria; c__Betaproteobacteria; o__Burkholderiales; f__Burkholderiaceae; g__Lautropia; s__mirabilis	18.8571	-0.958476	0.440293	-2.1769	0.0294877	0.724958		k__Bacteria; p__Firmicutes; c__Bacilli; o__Lactobacillales; f__Aerococcaceae; g__Abiotrophia; s__defectiva	3.76672	1.32337	0.444366	2.9781	0.0029004	0.404123		k__Bacteria; p__Firmicutes; c__Clostridia; o__Clostridiales; f__Peptostreptococcaceae_[XI]; g__Peptostreptococcus; s__stomatis	5.70454	1.71368	0.520434	3.29278	0.000992003	0.0987043
k__Bacteria; p__Bacteroidetes; c__Bacteroidia; o__Bacteroidales; f__Prevotellaceae; g__Prevotella; s__sp._oral_taxon_314	4.97918	1.54301	0.391767	3.9386	8.2e-05	0.00398872		k__Bacteria; p__Spirochaetes; c__Spirochaetia; o__Spirochaetales; f__Spirochaetaceae; g__Treponema; s__sp._oral_taxon_237	2.7113	-1.04751	0.455701	-2.29867	0.0215235	0.724958		k__Bacteria; p__Proteobacteria; c__Betaproteobacteria; o__Neisseriales; f__Neisseriaceae; g__Neisseria; s__oralis	5.08997	1.39283	0.460023	3.02774	0.00246387	0.404123		k__Bacteria; p__Bacteroidetes; c__Bacteroidia; o__Bacteroidales; f__Prevotellaceae; g__Prevotella; s__sp._oral_taxon_443	1.84056	1.16528	0.446627	2.60907	0.0090789	0.451675
k__Bacteria; p__Bacteroidetes; c__Bacteroidia; o__Bacteroidales; f__Prevotellaceae; g__Prevotella; s__sp._oral_taxon_304	2.88335	1.57231	0.407368	3.85969	0.000113531	0.00414388		k__Bacteria; p__Bacteroidetes; c__Bacteroidia; o__Bacteroidales; f__Prevotellaceae; g__Prevotella; s__oris	3.64062	-0.85875	0.421523	-2.03726	0.0416244	0.724958		k__Bacteria; p__Bacteroidetes; c__Bacteroidia; o__Bacteroidales; f__Prevotellaceae; g__Prevotella; s__pallens	18.449	1.24125	0.463531	2.67781	0.00741054	0.619521		k__Bacteria; p__Firmicutes; c__Bacilli; o__Lactobacillales; f__Streptococcaceae; g__Streptococcus; s__gordonii	5.62956	1.32099	0.506123	2.61001	0.00905392	0.451675
k__Bacteria; p__Bacteroidetes; c__Flavobacteriia; o__Flavobacteriales; f__Flavobacteriaceae; g__Capnocytophaga; s__leadbetteri	11.8888	1.44903	0.422458	3.43001	0.000603568	0.0176242		k__Bacteria; p__Firmicutes; c__Bacilli; o__Lactobacillales; f__Streptococcaceae; g__Streptococcus; s__multispecies_spp17_2	2.44572	0.849862	0.397867	2.13604	0.0326759	0.724958		k__Bacteria; p__Actinobacteria; c__Actinobacteria; o__Actinomycetales; f__Actinomycetaceae; g__Actinomyces; s__graevenitzii	5.5285	1.22532	0.44911	2.72832	0.00636576	0.619521		k__Bacteria; p__Bacteroidetes; c__Bacteroidia; o__Bacteroidales; f__Prevotellaceae; g__Alloprevotella; s__tannerae	4.88523	1.33186	0.531242	2.50707	0.0121736	0.484511
k__Bacteria; p__Bacteroidetes; c__Bacteroidia; o__Bacteroidales; f__Prevotellaceae; g__Alloprevotella; s__sp._oral_taxon_308	16.3203	-1.30104	0.438698	-2.96567	0.00302022	0.073492		k__Bacteria; p__Bacteroidetes; c__Bacteroidia; o__Bacteroidales; f__Prevotellaceae; g__Prevotella; s__multispecies_spp22_3	1.48382	1.02723	0.368079	2.79078	0.00525816	0.724958		k__Bacteria; p__Spirochaetes; c__Spirochaetia; o__Spirochaetales; f__Spirochaetaceae; g__Treponema; s__sp._oral_taxon_237	2.7113	1.12534	0.454366	2.47672	0.0132595	0.792797		k__Bacteria; p__Firmicutes; c__Clostridia; o__Clostridiales; f__multifamily; g__multigenus; s__multispecies_spp4_2	1.63352	0.918843	0.440552	2.08566	0.0370091	0.611399
k__Bacteria; p__Proteobacteria; c__Betaproteobacteria; o__Neisseriales; f__Neisseriaceae; g__Neisseria; s__multispecies_spp39_2	11.4728	-1.27813	0.449871	-2.8411	0.00449587	0.093771		k__Bacteria; p__Bacteroidetes; c__Bacteroidia; o__Bacteroidales; f__Porphyromonadaceae; g__Porphyromonas; s__pasteri	68.0815	0.967875	0.440834	2.19556	0.0281237	0.724958		k__Bacteria; p__Firmicutes; c__Clostridia; o__Clostridiales; f__Lachnospiraceae_[XIV]; g__Stomatobaculum; s__longum	2.429	-0.963168	0.38896	-2.47626	0.0132765	0.792797		k__Bacteria; p__Firmicutes; c__Negativicutes; o__Selenomonadales; f__Veillonellaceae; g__Selenomonas; s__sp._oral_taxon_126	1.44427	0.963938	0.440603	2.18777	0.0286864	0.611399
k__Bacteria; p__Bacteroidetes; c__Bacteroidia; o__Bacteroidales; f__Porphyromonadaceae; g__Porphyromonas; s__gingivalis	3.18284	1.02484	0.393284	2.60585	0.00916453	0.167253		k__Bacteria; p__Fusobacteria; c__Fusobacteriia; o__Fusobacteriales; f__Leptotrichiaceae; g__Leptotrichia; s__hongkongensis	3.11572	-0.887953	0.435664	-2.03816	0.041534	0.724958		k__Bacteria; p__Actinobacteria; c__Actinobacteria; o__Actinomycetales; f__Actinomycetaceae; g__Actinomyces; s__sp._oral_taxon_172	5.47796	1.02157	0.429011	2.38121	0.0172559	0.899838		k__Bacteria; p__Bacteroidetes; c__Bacteroidia; o__Bacteroidales; f__Prevotellaceae; g__Alloprevotella; s__sp._oral_taxon_308	16.3203	-1.1723	0.554893	-2.11266	0.0346296	0.611399
k__Bacteria; p__Firmicutes; c__Clostridia; o__Clostridiales; f__Lachnospiraceae_[XIV]; g__Oribacterium; s__asaccharolyticum	5.08669	-1.01179	0.3967	-2.55051	0.0107566	0.174496		k__Bacteria; p__Proteobacteria; c__Gammaproteobacteria; o__Pasteurellales; f__Pasteurellaceae; g__Haemophilus; s__pittmaniae	1.56511	0.994623	0.36686	2.71118	0.00670443	0.724958		k__Bacteria; p__Saccharibacteria_(TM7); c__TM7_[C-1]; o__TM7_[O-1]; f__TM7_[F-1]; g__TM7_[G-6]; s__sp._oral_taxon_870	3.60732	1.03771	0.443799	2.33825	0.0193745	0.899838		k__Bacteria; p__Firmicutes; c__Clostridia; o__Clostridiales; f__Peptoniphilaceae; g__Parvimonas; s__micra	2.60759	1.00028	0.47376	2.11137	0.0347402	0.611399
k__Bacteria; p__Firmicutes; c__Bacilli; o__Bacillales; f__Gemellaceae; g__Gemella; s__multispecies_spp51_2	4.46198	0.934639	0.385009	2.42758	0.0152	0.22192		k__Bacteria; p__Bacteroidetes; c__Flavobacteriia; o__Flavobacteriales; f__Flavobacteriaceae; g__Capnocytophaga; s__gingivalis	6.16074	0.909846	0.420492	2.16376	0.0304824	0.724958		k__Bacteria; p__Bacteroidetes; c__Flavobacteriia; o__Flavobacteriales; f__Flavobacteriaceae; g__Capnocytophaga; s__sp._oral_taxon_902	1.50391	-0.797183	0.379758	-2.09919	0.0358003	0.920158		k__Bacteria; p__Proteobacteria; c__Betaproteobacteria; o__Neisseriales; f__Neisseriaceae; g__Kingella; s__oralis	2.04356	1.00016	0.446057	2.24222	0.0249474	0.611399
k__Bacteria; p__Bacteroidetes; c__Bacteroidia; o__Bacteroidales; f__Prevotellaceae; g__Prevotella; s__aurantiaca	3.46818	-0.955458	0.408209	-2.34061	0.0192522	0.234236		k__Bacteria; p__Spirochaetes; c__Spirochaetia; o__Spirochaetales; f__Spirochaetaceae; g__Treponema; s__denticola	2.56521	-0.932795	0.44474	-2.09739	0.0359587	0.724958		k__Bacteria; p__Bacteroidetes; c__Bacteroidia; o__Bacteroidales; f__Prevotellaceae; g__Prevotella; s__melaninogenica	119.237	0.945915	0.447965	2.11158	0.0347225	0.920158		k__Bacteria; p__Bacteroidetes; c__Bacteroidia; o__Bacteroidales; f__Porphyromonadaceae; g__Porphyromonas; s__sp._oral_taxon_285	1.63451	0.91354	0.444683	2.05436	0.0399406	0.611399
k__Bacteria; p__Bacteroidetes; c__Bacteroidia; o__Bacteroidales; f__Porphyromonadaceae; g__Porphyromonas; s__catoniae	1.77333	-0.898082	0.380702	-2.35902	0.0183234	0.234236		k__Bacteria; p__Firmicutes; c__Clostridia; o__Clostridiales; f__Peptostreptococcaceae_[XI]; g__Filifactor; s__alocis	3.52232	-0.920069	0.442129	-2.081	0.037434	0.724958		k__Bacteria; p__Firmicutes; c__Clostridia; o__Clostridiales; f__Ruminococcaceae; g__Ruminococcaceae_[G-2]; s__sp._oral_taxon_085	3.82759	0.936964	0.429326	2.18241	0.0290794	0.920158		k__Bacteria; p__Firmicutes; c__Clostridia; o__Clostridiales; f__Peptostreptococcaceae_[XI]; g__Filifactor; s__alocis	3.52232	1.16478	0.517466	2.25092	0.0243904	0.611399
k__Bacteria; p__Firmicutes; c__Clostridia; o__Clostridiales; f__Peptostreptococcaceae_[XI]; g__Filifactor; s__alocis	2.64804	0.818113	0.374778	2.18293	0.0290411	0.326154		k__Bacteria; p__Bacteroidetes; c__Bacteroidia; o__Bacteroidales; f__Prevotellaceae; g__Prevotella; s__salivae	23.926	-0.996455	0.46843	-2.12722	0.0334017	0.724958		k__Bacteria; p__Bacteroidetes; c__Flavobacteriia; o__Flavobacteriales; f__Flavobacteriaceae; g__Capnocytophaga; s__sp._oral_taxon_324	1.35338	-0.81662	0.381323	-2.14154	0.0322302	0.920158		k__Bacteria; p__Bacteroidetes; c__Bacteroidia; o__Bacteroidales; f__Prevotellaceae; g__Prevotella; s__multispecies_spp50_2	7.30516	-1.20273	0.553558	-2.17272	0.0298012	0.611399
k__Bacteria; p__Actinobacteria; c__Actinobacteria; o__Actinomycetales; f__Actinomycetaceae; g__Actinomyces; s__sp._oral_taxon_180	1.88995	-0.838683	0.412441	-2.03346	0.042006	0.365068		k__Bacteria; p__Firmicutes; c__Bacilli; o__Bacillales; f__Gemellaceae; g__Gemella; s__sanguinis	8.83027	0.966597	0.390917	2.47264	0.0134119	0.724958		k__Bacteria; p__Bacteroidetes; c__Flavobacteriia; o__Flavobacteriales; f__Flavobacteriaceae; g__Capnocytophaga; s__sputigena	5.40956	0.93407	0.41597	2.24552	0.0247346	0.920158		k__Bacteria; p__Bacteroidetes; c__Bacteroidia; o__Bacteroidales; f__Prevotellaceae; g__Prevotella; s__nigrescens	1.93406	0.890859	0.44425	2.00531	0.0449302	0.63865
k__Bacteria; p__Firmicutes; c__Bacilli; o__Lactobacillales; f__Carnobacteriaceae; g__Granulicatella; s__elegans	2.37637	-0.818503	0.389536	-2.10122	0.0356213	0.365068		k__Bacteria; p__Fusobacteria; c__Fusobacteriia; o__Fusobacteriales; f__Fusobacteriaceae; g__Fusobacterium; s__necrophorum	1.36151	0.887821	0.375217	2.36615	0.0179739	0.724958		k__Bacteria; p__Bacteroidetes; c__Flavobacteriia; o__Flavobacteriales; f__Flavobacteriaceae; g__Capnocytophaga; s__leadbetteri	11.8888	0.960476	0.461518	2.08112	0.0374227	0.920158		k__Bacteria; p__Firmicutes; c__Negativicutes; o__Selenomonadales; f__Veillonellaceae; g__Selenomonas; s__sp._oral_taxon_136	2.55669	0.867461	0.484152	1.79171	0.0731791	0.661938
k__Bacteria; p__Firmicutes; c__Negativicutes; o__Selenomonadales; f__Veillonellaceae; g__Veillonella; s__sp._oral_taxon_917	2.07461	-0.828762	0.3986	-2.07918	0.0376005	0.365068		k__Bacteria; p__Proteobacteria; c__Betaproteobacteria; o__Neisseriales; f__Neisseriaceae; g__Neisseria; s__multispecies_spp39_2	21.431	-1.23801	0.481276	-2.57235	0.0101011	0.724958		k__Bacteria; p__Bacteroidetes; c__Bacteroidia; o__Bacteroidales; f__Prevotellaceae; g__Prevotella; s__sp._oral_taxon_314	4.97918	0.9277	0.441586	2.10083	0.0356556	0.920158		k__Bacteria; p__Fusobacteria; c__Fusobacteriia; o__Fusobacteriales; f__Leptotrichiaceae; g__Leptotrichia; s__hofstadii	4.65438	-1.0098	0.549641	-1.83719	0.0661815	0.661938
k__Bacteria; p__SR1; c__SR1_[C-1]; o__SR1_[O-1]; f__SR1_[F-1]; g__SR1_[G-1]; s__sp._oral_taxon_875	2.92918	0.781945	0.38878	2.01128	0.0442959	0.365068		k__Bacteria; p__Fusobacteria; c__Fusobacteriia; o__Fusobacteriales; f__Leptotrichiaceae; g__Leptotrichia; s__buccalis	4.17846	-1.03962	0.440442	-2.3604	0.0182552	0.724958		k__Bacteria; p__Bacteroidetes; c__Bacteroidia; o__Bacteroidales; f__Prevotellaceae; g__Prevotella; s__sp._oral_taxon_313	2.56834	0.949496	0.425232	2.23289	0.0255564	0.920158		k__Bacteria; p__Fusobacteria; c__Fusobacteriia; o__Fusobacteriales; f__Leptotrichiaceae; g__Leptotrichia; s__sp._oral_taxon_218	1.4495	0.811422	0.449889	1.8036	0.0712934	0.661938
k__Bacteria; p__Bacteroidetes; c__Bacteroidia; o__Bacteroidales; f__Prevotellaceae; g__Prevotella; s__multispecies_spp50_2	5.67024	-0.85051	0.424284	-2.00458	0.0450084	0.365068		k__Bacteria; p__Firmicutes; c__Bacilli; o__Lactobacillales; f__Streptococcaceae; g__Streptococcus; s__multispecies_spp41_3	4.41248	0.825836	0.403821	2.04505	0.0408496	0.724958		k__Bacteria; p__Firmicutes; c__Clostridia; o__Clostridiales; f__multifamily; g__multigenus; s__multispecies_spp4_2	1.63352	-0.64909	0.371602	-1.74674	0.0806832	0.929748		k__Bacteria; p__Proteobacteria; c__Gammaproteobacteria; o__Pasteurellales; f__Pasteurellaceae; g__Haemophilus; s__parainfluenzae	155.124	-0.935923	0.521042	-1.79625	0.0724544	0.661938
k__Bacteria; p__Firmicutes; c__Negativicutes; o__Selenomonadales; f__Veillonellaceae; g__Selenomonas; s__sputigena	2.93337	0.717444	0.373324	1.92177	0.0546344	0.419822		k__Bacteria; p__Bacteroidetes; c__Flavobacteriia; o__Flavobacteriales; f__Flavobacteriaceae; g__Capnocytophaga; s__leadbetteri	11.8888	1.15525	0.453969	2.54479	0.0109345	0.724958		k__Bacteria; p__Firmicutes; c__Clostridia; o__Clostridiales; f__Lachnospiraceae_[XIV]; g__Catonella; s__morbi	3.07963	0.762205	0.415297	1.83533	0.0664571	0.929748		k__Bacteria; p__Firmicutes; c__Bacilli; o__Lactobacillales; f__Aerococcaceae; g__Abiotrophia; s__defectiva	3.76672	-1.05254	0.546514	-1.92591	0.0541153	0.661938
k__Bacteria; p__Proteobacteria; c__Gammaproteobacteria; o__Pasteurellales; f__Pasteurellaceae; g__Haemophilus; s__parahaemolyticus	3.74483	0.714268	0.409456	1.74443	0.0810838	0.454707		k__Bacteria; p__Actinobacteria; c__Actinobacteria; o__Actinomycetales; f__Actinomycetaceae; g__Actinomyces; s__graevenitzii	5.5285	0.998361	0.440091	2.26853	0.0232968	0.724958		k__Bacteria; p__Bacteroidetes; c__Bacteroidia; o__Bacteroidales; f__Prevotellaceae; g__Prevotella; s__aurantiaca	3.46818	-0.779443	0.42668	-1.82676	0.0677356	0.929748		k__Bacteria; p__Spirochaetes; c__Spirochaetia; o__Spirochaetales; f__Spirochaetaceae; g__Treponema; s__denticola	2.56521	0.935839	0.516539	1.81175	0.0700249	0.661938
k__Bacteria; p__Proteobacteria; c__Gammaproteobacteria; o__Pasteurellales; f__Pasteurellaceae; g__Haemophilus; s__haemolyticus	2.47029	-0.672975	0.38774	-1.73563	0.0826284	0.454707		k__Bacteria; p__Firmicutes; c__Bacilli; o__Lactobacillales; f__Streptococcaceae; g__Streptococcus; s__cristatus	10.9205	-0.92883	0.404921	-2.29385	0.0217989	0.724958		k__Bacteria; p__Firmicutes; c__Clostridia; o__Clostridiales; f__Lachnospiraceae_[XIV]; g__Oribacterium; s__asaccharolyticum	5.08669	-0.843066	0.417993	-2.01694	0.0437019	0.929748		k__Bacteria; p__Synergistetes; c__Synergistia; o__Synergistales; f__Synergistaceae; g__Fretibacterium; s__sp._oral_taxon_359	1.44802	0.812497	0.448721	1.81069	0.0701881	0.661938
k__Bacteria; p__Bacteroidetes; c__Bacteroidia; o__Bacteroidales; f__Prevotellaceae; g__Prevotella; s__sp._oral_taxon_309	2.8718	-0.718244	0.390779	-1.83798	0.0660654	0.454707		k__Bacteria; p__Saccharibacteria(TM7); c__TM7_[C]; o__TM7_[O]; f__TM7_[F]; g__TM7_[G]; s__sp._Oral_Taxon_A56	15.7131	-1.27309	0.478169	-2.66243	0.00775778	0.724958		k__Bacteria; p__Bacteroidetes; c__Bacteroidia; o__Bacteroidales; f__Porphyromonadaceae; g__Tannerella; s__sp._oral_taxon_286	2.20114	0.695549	0.399631	1.74048	0.0817753	0.929748		k__Bacteria; p__Saccharibacteria_(TM7); c__TM7_[C-1]; o__TM7_[O-1]; f__TM7_[F-1]; g__TM7_[G-6]; s__sp._oral_taxon_870	3.60732	-1.02037	0.54678	-1.86615	0.0620209	0.661938
k__Bacteria; p__Proteobacteria; c__Betaproteobacteria; o__Burkholderiales; f__Comamonadaceae; g__Ottowia; s__sp._oral_taxon_894	2.61069	-0.695004	0.388149	-1.79056	0.0733636	0.454707		k__Bacteria; p__Firmicutes; c__Bacilli; o__Lactobacillales; f__Streptococcaceae; g__Streptococcus; s__gordonii	5.62956	-0.880551	0.429715	-2.04915	0.0404472	0.724958		k__Bacteria; p__Bacteroidetes; c__Bacteroidia; o__Bacteroidales; f__Porphyromonadaceae; g__Porphyromonas; s__gingivalis	3.18284	0.769688	0.434932	1.76967	0.0767815	0.929748		k__Bacteria; p__Synergistetes; c__Synergistia; o__Synergistales; f__Synergistaceae; g__Fretibacterium; s__fastidiosum	1.62674	0.783219	0.445494	1.75809	0.0787323	0.681205
k__Bacteria; p__Bacteroidetes; c__Flavobacteriia; o__Flavobacteriales; f__Flavobacteriaceae; g__Capnocytophaga; s__gingivalis	6.16074	0.710372	0.397608	1.78661	0.0739999	0.454707		k__Bacteria; p__Bacteroidetes; c__Bacteroidia; o__Bacteroidales; f__Prevotellaceae; g__Prevotella; s__sp._oral_taxon_314	4.97918	-1.01064	0.443848	-2.277	0.0227859	0.724958		k__Bacteria; p__Saccharibacteria_(TM7); c__TM7_[C-1]; o__TM7_[O-1]; f__TM7_[F-1]; g__TM7_[G-1]; s__sp._oral_taxon_346	1.47518	-0.748924	0.374234	-2.00122	0.0453686	0.929748		k__Bacteria; p__Firmicutes; c__Negativicutes; o__Selenomonadales; f__Veillonellaceae; g__Selenomonas; s__sputigena	2.93337	0.790638	0.49473	1.59812	0.110016	0.817633
k__Bacteria; p__Bacteroidetes; c__Flavobacteriia; o__Flavobacteriales; f__Flavobacteriaceae; g__Capnocytophaga; s__sputigena	5.40956	0.665589	0.382491	1.74014	0.0818342	0.454707		k__Bacteria; p__Bacteroidetes; c__Bacteroidia; o__Bacteroidales; f__Prevotellaceae; g__Alloprevotella; s__tannerae	4.88523	-0.909738	0.451652	-2.01425	0.0439835	0.735404		k__Bacteria; p__Saccharibacteria_(TM7); c__TM7_[C-1]; o__TM7_[O-1]; f__TM7_[F-1]; g__TM7_[G-1]; s__sp._oral_taxon_347	1.83771	-0.72728	0.380375	-1.91201	0.0558751	0.929748		k__Bacteria; p__Bacteroidetes; c__Bacteroidia; o__Bacteroidales; f__Prevotellaceae; g__Prevotella; s__aurantiaca	4.65068	-0.873154	0.550612	-1.58579	0.112787	0.817633
k__Bacteria; p__Fusobacteria; c__Fusobacteriia; o__Fusobacteriales; f__Leptotrichiaceae; g__Leptotrichia; s__buccalis	3.42075	-0.681771	0.394672	-1.72743	0.0840897	0.454707		k__Bacteria; p__Proteobacteria; c__Gammaproteobacteria; o__Pasteurellales; f__Pasteurellaceae; g__Aggregatibacter; s__sp._oral_taxon_458	2.99684	-0.854326	0.432225	-1.97658	0.0480894	0.744495		k__Bacteria; p__Bacteroidetes; c__Bacteroidia; o__Bacteroidales; f__Porphyromonadaceae; g__Porphyromonas; s__sp._oral_taxon_285	1.63451	-0.738261	0.373745	-1.97531	0.0482333	0.929748		k__Bacteria; p__Firmicutes; c__Bacilli; o__Lactobacillales; f__Streptococcaceae; g__Streptococcus; s__sanguinis	7.36658	-0.832513	0.529488	-1.5723	0.115882	0.817633
k__Bacteria; p__Proteobacteria; c__Epsilonproteobacteria; o__Campylobacterales; f__Campylobacteraceae; g__Campylobacter; s__concisus	9.38344	-0.714578	0.387467	-1.84423	0.06515	0.454707		k__Bacteria; p__Fusobacteria; c__Fusobacteriia; o__Fusobacteriales; f__Leptotrichiaceae; g__Leptotrichia; s__multispecies_spp31_2	1.30573	0.751633	0.380004	1.97796	0.047933	0.744495		k__Bacteria; p__Fusobacteria; c__Fusobacteria; o__Fusobacteria_[O]; f__Fusobacteria_[F]; g__Fusobacteria_[G-1]; s__sp._Oral_Taxon_A71	1.80533	0.740132	0.425691	1.73866	0.0820947	0.929748		k__Bacteria; p__Proteobacteria; c__Gammaproteobacteria; o__Cardiobacteriales; f__Cardiobacteriaceae; g__Cardiobacterium; s__hominis	2.45193	0.772846	0.474066	1.63025	0.103049	0.817633
k__Bacteria; p__Firmicutes; c__Bacilli; o__Lactobacillales; f__Streptococcaceae; g__Streptococcus; s__gordonii	4.32578	0.607779	0.359938	1.68857	0.0913028	0.476079		k__Bacteria; p__Bacteroidetes; c__Bacteroidia; o__Bacteroidales; f__Prevotellaceae; g__Alloprevotella; s__rava	2.79869	-0.85033	0.436448	-1.9483	0.0513793	0.76702		k__Bacteria; p__Bacteroidetes; c__Bacteroidia; o__Bacteroidales; f__Prevotellaceae; g__Alloprevotella; s__tannerae	3.97562	0.830349	0.440662	1.88432	0.0595214	0.929748		k__Bacteria; p__Synergistetes; c__Synergistia; o__Synergistales; f__Synergistaceae; g__Fretibacterium; s__sp._oral_taxon_360	1.38707	0.711824	0.456783	1.55834	0.119153	0.817633
k__Bacteria; p__Firmicutes; c__Negativicutes; o__Selenomonadales; f__Veillonellaceae; g__Selenomonas; s__sp._oral_taxon_478	2.26711	-0.659746	0.395845	-1.66667	0.0955791	0.481191		k__Bacteria; p__Firmicutes; c__Negativicutes; o__Selenomonadales; f__Veillonellaceae; g__Selenomonas; s__sp._oral_taxon_136	2.55669	-0.784267	0.420603	-1.86463	0.0622338	0.773359		k__Bacteria; p__Proteobacteria; c__Betaproteobacteria; o__Neisseriales; f__Neisseriaceae; g__Neisseria; s__multispecies_spp39_2	21.431	0.914503	0.487931	1.87425	0.0608965	0.929748		k__Bacteria; p__Fusobacteria; c__Fusobacteriia; o__Fusobacteriales; f__Leptotrichiaceae; g__Leptotrichia; s__buccalis	4.17846	-0.874525	0.541724	-1.61434	0.106455	0.817633
k__Bacteria; p__Actinobacteria; c__Actinobacteria; o__Actinomycetales; f__Actinomycetaceae; g__Actinomyces; s__sp._oral_taxon_172	5.47796	0.639427	0.397467	1.60875	0.10767	0.52241		k__Bacteria; p__Firmicutes; c__Negativicutes; o__Selenomonadales; f__Veillonellaceae; g__Selenomonas; s__sp._oral_taxon_478	2.26711	-0.817588	0.436018	-1.87513	0.0607755	0.773359		k__Bacteria; p__Firmicutes; c__Clostridia; o__Clostridiales; f__Lachnospiraceae_[XIVa]; g__Lachnospiraceae_[G]; s__sp._Oral_Taxon_B32	1.38649	-0.664638	0.382524	-1.7375	0.0822982	0.929748		k__Bacteria; p__Firmicutes; c__Clostridia; o__Clostridiales; f__Peptoniphilaceae; g__Parvimonas; s__multispecies_spp19_2	1.56639	0.692751	0.451776	1.53339	0.125179	0.830352
k__Bacteria; p__Fusobacteria; c__Fusobacteria; o__Fusobacteria_[O]; f__Fusobacteria_[F]; g__Fusobacteria_[G-1]; s__sp._Oral_Taxon_A71	1.80533	0.62561	0.392463	1.59406	0.110923	0.52241		k__Bacteria; p__Bacteroidetes; c__Bacteroidia; o__Bacteroidales; f__Prevotellaceae; g__Prevotella; s__intermedia	4.82668	-0.851842	0.447837	-1.90212	0.0571548	0.773359		k__Bacteria; p__Saccharibacteria_(TM7); c__TM7_[C-1]; o__TM7_[O-1]; f__TM7_[F-1]; g__TM7_[G-1]; s__sp._oral_taxon_352	46.9531	0.800246	0.439956	1.81892	0.0689232	0.929748		k__Bacteria; p__Firmicutes; c__Bacilli; o__Lactobacillales; f__Streptococcaceae; g__Streptococcus; s__multispecies_spp17_2	2.44572	-0.806084	0.534017	-1.50947	0.131178	0.842078
k__Bacteria; p__Saccharibacteria_(TM7); c__TM7_[C-1]; o__TM7_[O-1]; f__TM7_[F-1]; g__TM7_[G-3]; s__sp._oral_taxon_351	5.62209	-0.573471	0.365138	-1.57056	0.116285	0.52934		k__Bacteria; p__Firmicutes; c__Clostridia; o__Clostridiales; f__Lachnospiraceae_[XIV]; g__Oribacterium; s__asaccharolyticum	5.08669	0.802792	0.421546	1.9044	0.0568585	0.773359		k__Bacteria; p__SR1; c__SR1_[C-1]; o__SR1_[O-1]; f__SR1_[F-1]; g__SR1_[G-1]; s__sp._oral_taxon_875	3.88041	0.842155	0.445859	1.88883	0.0589139	0.929748		k__Bacteria; p__Fusobacteria; c__Fusobacteriia; o__Fusobacteriales; f__Leptotrichiaceae; g__Leptotrichia; s__hongkongensis	3.11572	-0.801737	0.538421	-1.48905	0.136474	0.848695
k__Bacteria; p__Firmicutes; c__Clostridia; o__Clostridiales; f__Lachnospiraceae_[XIV]; g__Lachnospiraceae_[G-2]; s__sp._oral_taxon_096	2.53697	-0.628739	0.404005	-1.55626	0.119645	0.52934		k__Bacteria; p__Firmicutes; c__Clostridia; o__Clostridiales; f__Lachnospiraceae_[XIV]; g__Lachnospiraceae_[G-2]; s__sp._oral_taxon_096	2.53697	-0.82177	0.441844	-1.85986	0.0629048	0.773359		k__Bacteria; p__Firmicutes; c__Clostridia; o__Clostridiales; f__Lachnospiraceae_[XIV]; g__Oribacterium; s__sinus	9.15072	0.817239	0.434987	1.87877	0.0602765	0.929748		k__Bacteria; p__Bacteroidetes; c__Flavobacteriia; o__Flavobacteriales; f__Flavobacteriaceae; g__Bergeyella; s__sp._oral_taxon_322	2.62487	-0.732999	0.51486	-1.42369	0.154537	0.854418
k__Bacteria; p__Bacteroidetes; c__Bacteroidia; o__Bacteroidales; f__Prevotellaceae; g__Prevotella; s__intermedia	4.82668	0.627234	0.41526	1.51046	0.130926	0.55396		k__Bacteria; p__Proteobacteria; c__Betaproteobacteria; o__Neisseriales; f__Neisseriaceae; g__Kingella; s__denitrificans	1.65922	0.697442	0.367763	1.89645	0.057901	0.773359		k__Bacteria; p__Firmicutes; c__Clostridia; o__Clostridiales; f__Ruminococcaceae; g__Ruminococcaceae_[G-1]; s__sp._oral_taxon_075	3.7282	0.732143	0.419174	1.74663	0.0807016	0.929748		k__Bacteria; p__Firmicutes; c__Clostridia; o__Clostridiales; f__Lachnospiraceae_[XIV]; g__Lachnoanaerobaculum; s__umeaense	6.25822	0.757369	0.521317	1.4528	0.146279	0.854418
k__Bacteria; p__Firmicutes; c__Clostridia; o__Clostridiales; f__Lachnospiraceae_[XIV]; g__Stomatobaculum; s__longum	2.429	-0.576474	0.383509	-1.50316	0.132799	0.55396		k__Bacteria; p__Proteobacteria; c__Betaproteobacteria; o__Neisseriales; f__Neisseriaceae; g__Neisseria; s__oralis	7.64639	-0.862076	0.472029	-1.82632	0.0678018	0.809748		k__Bacteria; p__Saccharibacteria(TM7); c__TM7_[C]; o__TM7_[O]; f__TM7_[F]; g__TM7_[G]; s__sp._Oral_Taxon_A56	9.7382	0.831497	0.473061	1.7577	0.0787993	0.929748		k__Bacteria; p__Firmicutes; c__Clostridia; o__Clostridiales; f__Lachnospiraceae_[XIV]; g__Lachnospiraceae_[G-8]; s__sp._oral_taxon_500	1.44703	0.651489	0.456567	1.42693	0.153601	0.854418
k__Bacteria; p__Fusobacteria; c__Fusobacteriia; o__Fusobacteriales; f__Leptotrichiaceae; g__Leptotrichia; s__sp._oral_taxon_215	7.49667	-0.619568	0.428496	-1.44591	0.148202	0.60104		k__Bacteria; p__Bacteroidetes; c__Bacteroidia; o__Bacteroidales; f__Prevotellaceae; g__Prevotella; s__sp._oral_taxon_306	32.2901	-0.861767	0.481472	-1.78986	0.0734766	0.853145		k__Bacteria; p__Actinobacteria; c__Actinobacteria; o__Actinomycetales; f__Actinomycetaceae; g__Actinomyces; s__lingnae_[NVP]	4.02438	-0.657097	0.357243	-1.83936	0.0658626	0.929748		k__Bacteria; p__Bacteroidetes; c__Bacteroidia; o__Bacteroidales; f__Bacteroidales_[F-2]; g__Bacteroidales_[G-2]; s__sp._oral_taxon_274	2.22162	-0.750619	0.527275	-1.42358	0.154568	0.854418
k__Bacteria; p__Firmicutes; c__Clostridia; o__Clostridiales; f__Lachnospiraceae_[XIV]; g__Lachnoanaerobaculum; s__orale	6.69491	-0.588246	0.42743	-1.37624	0.168748	0.64432		k__Bacteria; p__Firmicutes; c__Clostridia; o__Clostridiales; f__multifamily; g__multigenus; s__multispecies_spp4_2	1.63352	0.637027	0.369152	1.72565	0.0844106	0.856511		k__Bacteria; p__Firmicutes; c__Bacilli; o__Bacillales; f__Gemellaceae; g__Gemella; s__multispecies_spp51_2	4.46198	0.780002	0.424751	1.83637	0.0663024	0.929748		k__Bacteria; p__Firmicutes; c__Bacilli; o__Bacillales; f__NA; g__Gemella; s__parahaemolysans	1.99453	-0.436832	0.526128	-0.830276	0.406383	0.87573
k__Bacteria; p__Firmicutes; c__Bacilli; o__Lactobacillales; f__Streptococcaceae; g__Streptococcus; s__multispecies_spp33_2	4.97436	0.518156	0.375034	1.38162	0.167088	0.64432		k__Bacteria; p__Firmicutes; c__Clostridia; o__Clostridiales; f__Lachnospiraceae_[XIV]; g__Stomatobaculum; s__sp._oral_taxon_097	5.48301	0.73275	0.429651	1.70545	0.08811	0.856511		k__Bacteria; p__Firmicutes; c__Clostridia; o__Clostridiales; f__Lachnospiraceae_[XIV]; g__Stomatobaculum; s__sp._oral_taxon_097	5.48301	0.740466	0.436188	1.69758	0.0895866	0.952675		k__Bacteria; p__Firmicutes; c__Bacilli; o__Lactobacillales; f__Streptococcaceae; g__Streptococcus; s__multispecies_spp1_2	14.5116	0.419973	0.53343	0.787307	0.431102	0.87573
k__Bacteria; p__Bacteroidetes; c__Flavobacteriia; o__Flavobacteriales; f__Flavobacteriaceae; g__Capnocytophaga; s__sp._oral_taxon_326	2.07426	-0.528565	0.387101	-1.36545	0.172113	0.64432		k__Bacteria; p__Firmicutes; c__Clostridia; o__Clostridiales; f__Ruminococcaceae; g__Ruminococcaceae_[G-2]; s__sp._oral_taxon_085	3.82759	-0.755527	0.432529	-1.74677	0.0806779	0.856511		k__Bacteria; p__Saccharibacteria_(TM7); c__TM7_[C-1]; o__TM7_[O-1]; f__TM7_[F-2]; g__TM7_[G-5]; s__sp._oral_taxon_356	1.99849	0.739569	0.432616	1.70953	0.0873534	0.952675		k__Bacteria; p__Actinobacteria; c__Actinobacteria; o__Actinomycetales; f__Actinomycetaceae; g__Actinomyces; s__sp._oral_taxon_169	1.5668	-0.442176	0.512647	-0.862535	0.388393	0.87573
k__Bacteria; p__Bacteroidetes; c__Bacteroidia; o__Bacteroidales; f__Prevotellaceae; g__Prevotella; s__melaninogenica	119.237	0.556356	0.425882	1.30636	0.19143	0.698718		k__Bacteria; p__Fusobacteria; c__Fusobacteriia; o__Fusobacteriales; f__Leptotrichiaceae; g__Leptotrichia; s__wadei	1.79937	-0.721222	0.41378	-1.74301	0.0813319	0.856511		k__Bacteria; p__Bacteroidetes; c__Flavobacteria; o__Flavobacteriales; f__Flavobacteriaceae; g__Capnocytophaga; s__sp._Oral_Taxon_A48	1.9704	0.77003	0.455832	1.68928	0.0911651	0.952675		k__Bacteria; p__Proteobacteria; c__Betaproteobacteria; o__Burkholderiales; f__Burkholderiaceae; g__Lautropia; s__mirabilis	18.8571	-0.426895	0.541387	-0.788521	0.430392	0.87573
k__Bacteria; p__Firmicutes; c__Bacilli; o__Lactobacillales; f__Streptococcaceae; g__Streptococcus; s__multispecies_spp1_2	14.5116	0.506639	0.404848	1.25143	0.210778	0.718866		k__Bacteria; p__SR1; c__SR1_[C-1]; o__SR1_[O-1]; f__SR1_[F-1]; g__SR1_[G-1]; s__sp._oral_taxon_874	1.96461	0.629634	0.368596	1.70819	0.0876005	0.856511		k__Bacteria; p__Fusobacteria; c__Fusobacteriia; o__Fusobacteriales; f__Leptotrichiaceae; g__Leptotrichia; s__multispecies_sppn1_2_nov_97.99%	1.23869	-0.0386183	0.402865	-0.0958592	0.923632	0.985929		k__Bacteria; p__Firmicutes; c__Negativicutes; o__Selenomonadales; f__Veillonellaceae; g__Selenomonas; s__noxia	2.90064	0.64768	0.508859	1.27281	0.203086	0.87573
k__Bacteria; p__Bacteroidetes; c__Bacteroidia; o__Bacteroidales; f__Prevotellaceae; g__Prevotella; s__oris	3.64062	-0.480569	0.384048	-1.25133	0.210816	0.718866		k__Bacteria; p__Bacteroidetes; c__Bacteroidia; o__Bacteroidales; f__Bacteroidales_[F-2]; g__Bacteroidales_[G-2]; s__sp._oral_taxon_274	2.22162	-0.723024	0.418511	-1.72761	0.0840578	0.856511		k__Bacteria; p__Bacteroidetes; c__Flavobacteriia; o__Flavobacteriales; f__Flavobacteriaceae; g__Bergeyella; s__sp._oral_taxon_907_nov_97.42%	1.17721	-0.386593	0.397877	-0.97164	0.33123	0.985929		k__Bacteria; p__Proteobacteria; c__Epsilonproteobacteria; o__Campylobacterales; f__Campylobacteraceae; g__Campylobacter; s__multispecies_spp7_2	2.05368	0.659411	0.477579	1.38074	0.16736	0.87573
k__Bacteria; p__Fusobacteria; c__Fusobacteriia; o__Fusobacteriales; f__Leptotrichiaceae; g__Leptotrichia; s__sp._oral_taxon_392	2.60616	-0.466823	0.381763	-1.22281	0.221402	0.718866		k__Bacteria; p__Firmicutes; c__Clostridia; o__Clostridiales; f__Ruminococcaceae; g__Ruminococcaceae_[G-1]; s__sp._oral_taxon_075	3.7282	-0.745706	0.424002	-1.75873	0.0786229	0.856511		k__Bacteria; p__Proteobacteria; c__Betaproteobacteria; o__Neisseriales; f__Neisseriaceae; g__Neisseria; s__sp._oral_taxon_018_nov_97.67%	1.17721	0.164575	0.414382	0.397159	0.69125	0.985929		k__Bacteria; p__Bacteroidetes; c__Bacteroidia; o__Bacteroidales; f__Prevotellaceae; g__Prevotella; s__scopos	1.61241	-0.460043	0.514722	-0.89377	0.371445	0.87573
k__Bacteria; p__Fusobacteria; c__Fusobacteriia; o__Fusobacteriales; f__Fusobacteriaceae; g__Fusobacterium; s__multispecies_spp48_2	2.06562	0.444094	0.363306	1.22237	0.221568	0.718866		k__Bacteria; p__Proteobacteria; c__Betaproteobacteria; o__Neisseriales; f__Neisseriaceae; g__Neisseria; s__multispecies_spp38_2	15.5192	-0.7872	0.46848	-1.68033	0.0928937	0.88249		k__Bacteria; p__Bacteroidetes; c__Flavobacteriia; o__Flavobacteriales; f__Flavobacteriaceae; g__Capnocytophaga; s__multispecies_sppn1_2_nov_96.35%	1.17962	0.164774	0.414248	0.397767	0.690802	0.985929		k__Bacteria; p__Fusobacteria; c__Fusobacteriia; o__Fusobacteriales; f__Fusobacteriaceae; g__Fusobacterium; s__sp._oral_taxon_203	2.96418	0.517657	0.526132	0.983891	0.325169	0.87573
k__Bacteria; p__Actinobacteria; c__Actinobacteria; o__Actinomycetales; f__Actinomycetaceae; g__Actinomyces; s__lingnae_[NVP]	4.02438	-0.424873	0.345674	-1.22911	0.219029	0.718866		k__Bacteria; p__Actinobacteria; c__Actinobacteria; o__Actinomycetales; f__Actinomycetaceae; g__Actinomyces; s__multispecies_spp6_2	1.90302	0.613224	0.368485	1.66418	0.0960774	0.892452		k__Bacteria; p__Firmicutes; c__Clostridia; o__Clostridiales; f__multifamily; g__multigenus; s__multispecies_sppn1_2_nov_96.21%	1.11841	-0.0627527	0.411509	-0.152494	0.878797	0.985929		k__Bacteria; p__Fusobacteria; c__Fusobacteriia; o__Fusobacteriales; f__Fusobacteriaceae; g__Fusobacterium; s__sp._oral_taxon_370	1.53418	0.395758	0.468561	0.844624	0.398321	0.87573
k__Bacteria; p__Bacteroidetes; c__Bacteroidia; o__Bacteroidales; f__Prevotellaceae; g__Prevotella; s__veroralis	3.51058	0.463945	0.393457	1.17915	0.238339	0.739381		k__Bacteria; p__Firmicutes; c__Bacilli; o__Lactobacillales; f__Streptococcaceae; g__Streptococcus; s__multispecies_spp1_2	14.5116	-0.693568	0.434845	-1.59498	0.110717	0.948		k__Bacteria; p__Firmicutes; c__Negativicutes; o__Selenomonadales; f__Sporomusaceae; g__multigenus; s__multispecies_sppn1_2_nov_87.50%	1.11905	0.0851389	0.416298	0.204515	0.837951	0.985929		k__Bacteria; p__Firmicutes; c__Bacilli; o__Lactobacillales; f__Streptococcaceae; g__Streptococcus; s__multispecies_spp12_3	3.19457	0.559096	0.487505	1.14685	0.251444	0.87573
k__Bacteria; p__Proteobacteria; c__Betaproteobacteria; o__Neisseriales; f__Neisseriaceae; g__Neisseria; s__mucosa	1.87	0.463821	0.397341	1.16731	0.243084	0.739381		k__Bacteria; p__Actinobacteria; c__Actinobacteria; o__Actinomycetales; f__Actinomycetaceae; g__Actinomyces; s__sp._oral_taxon_180	1.88995	-0.70176	0.448105	-1.56606	0.117334	0.948		k__Bacteria; p__Bacteroidetes; c__Bacteroidia; o__Bacteroidales; f__Prevotellaceae; g__Prevotella; s__denticola	1.38634	-0.560054	0.380703	-1.47111	0.141263	0.985929		k__Bacteria; p__Bacteroidetes; c__Bacteroidia; o__Bacteroidales; f__Prevotellaceae; g__Prevotella; s__oris	3.64062	0.546149	0.507385	1.0764	0.281749	0.87573
k__Bacteria; p__Gracilibacteria_(GN02); c__GN02_[C-2]; o__GN02_[O-2]; f__GN02_[F-2]; g__GN02_[G-2]; s__sp._oral_taxon_873	1.86273	0.42201	0.359802	1.1729	0.240837	0.739381		k__Bacteria; p__Firmicutes; c__Clostridia; o__Clostridiales; f__Peptostreptococcaceae_[XI]; g__Peptostreptococcus; s__stomatis	3.89904	-0.674009	0.421151	-1.6004	0.10951	0.948		k__Bacteria; p__Bacteroidetes; c__Bacteroidia; o__Bacteroidales; f__Prevotellaceae; g__Prevotella; s__nigrescens	1.93406	-0.238995	0.376628	-0.634566	0.525711	0.985929		k__Bacteria; p__Firmicutes; c__Bacilli; o__Lactobacillales; f__Streptococcaceae; g__Streptococcus; s__lactarius	4.95289	-0.48775	0.516683	-0.944002	0.345169	0.87573
k__Bacteria; p__Firmicutes; c__Bacilli; o__Lactobacillales; f__Streptococcaceae; g__Streptococcus; s__lactarius	4.95289	-0.426634	0.377268	-1.13085	0.258118	0.740745		k__Bacteria; p__Bacteroidetes; c__Bacteroidia; o__Bacteroidales; f__Prevotellaceae; g__Prevotella; s__sp._Oral_Taxon_299	1.70571	-0.6415	0.411601	-1.55855	0.119103	0.948		k__Bacteria; p__Saccharibacteria_(TM7); c__TM7_[C-1]; o__TM7_[O-1]; f__TM7_[F-1]; g__TM7_[G-2]; s__sp._oral_taxon_350	1.43986	0.331923	0.407039	0.815457	0.414811	0.985929		k__Bacteria; p__Bacteroidetes; c__Bacteroidia; o__Bacteroidales; f__Prevotellaceae; g__Alloprevotella; s__sp._oral_taxon_914	9.94347	0.525625	0.550631	0.954586	0.339787	0.87573
k__Bacteria; p__Bacteroidetes; c__Bacteroidia; o__Bacteroidales; f__Prevotellaceae; g__Prevotella; s__sp._oral_taxon_305	2.88906	0.419983	0.386462	1.08674	0.277152	0.740745		k__Bacteria; p__Firmicutes; c__Clostridia; o__Clostridiales; f__Lachnospiraceae_[XIV]; g__Lachnoanaerobaculum; s__umeaense	6.25822	0.651856	0.422052	1.54449	0.122469	0.948		k__Bacteria; p__Proteobacteria; c__Betaproteobacteria; o__Neisseriales; f__Neisseriaceae; g__Neisseria; s__cinerea	1.38694	0.142711	0.400746	0.356114	0.721755	0.985929		k__Bacteria; p__Bacteroidetes; c__Bacteroidia; o__Bacteroidales; f__Porphyromonadaceae; g__Tannerella; s__forsythia	2.25332	0.420272	0.478863	0.877647	0.380135	0.87573
k__Bacteria; p__Firmicutes; c__Clostridia; o__Clostridiales; f__Lachnospiraceae_[XIV]; g__Butyrivibrio; s__sp._oral_taxon_455	2.95747	-0.437052	0.397443	-1.09966	0.271481	0.740745		k__Bacteria; p__Saccharibacteria_(TM7); c__TM7_[C-1]; o__TM7_[O-1]; f__TM7_[F-1]; g__TM7_[G-1]; s__sp._oral_taxon_349	2.15169	-0.68322	0.421	-1.62285	0.104621	0.948		k__Bacteria; p__Proteobacteria; c__Gammaproteobacteria; o__Cardiobacteriales; f__Cardiobacteriaceae; g__Cardiobacterium; s__valvarum	2.06019	-0.471556	0.401977	-1.17309	0.240759	0.985929		k__Bacteria; p__Proteobacteria; c__Gammaproteobacteria; o__Pasteurellales; f__Pasteurellaceae; g__Haemophilus; s__haemolyticus	2.47029	-0.466316	0.52738	-0.884212	0.376582	0.87573
k__Bacteria; p__Bacteroidetes; c__Bacteroidia; o__Bacteroidales; f__Prevotellaceae; g__Alloprevotella; s__sp._oral_taxon_914	9.94347	0.470243	0.434714	1.08173	0.279372	0.740745		k__Bacteria; p__Bacteroidetes; c__Bacteroidia; o__Bacteroidales; f__Prevotellaceae; g__Prevotella; s__sp._oral_taxon_317	1.68265	-0.642768	0.408702	-1.57271	0.115787	0.948		k__Bacteria; p__Firmicutes; c__Bacilli; o__Bacillales; f__NA; g__Gemella; s__parahaemolysans	1.99453	0.435619	0.419617	1.03813	0.299208	0.985929		k__Bacteria; p__Proteobacteria; c__Gammaproteobacteria; o__Pasteurellales; f__Pasteurellaceae; g__Aggregatibacter; s__aphrophilus	1.65592	-0.493624	0.516424	-0.955851	0.339148	0.87573
k__Bacteria; p__Firmicutes; c__Clostridia; o__Clostridiales; f__Ruminococcaceae; g__Ruminococcaceae_[G-2]; s__sp._oral_taxon_085	3.82759	-0.432535	0.398722	-1.0848	0.278008	0.740745		k__Bacteria; p__Firmicutes; c__Bacilli; o__Lactobacillales; f__Streptococcaceae; g__Streptococcus; s__multispecies_spp32_2	5.77471	-0.639664	0.406266	-1.5745	0.115373	0.948		k__Bacteria; p__Spirochaetes; c__Spirochaetia; o__Spirochaetales; f__Spirochaetaceae; g__Treponema; s__medium	1.20756	0.0594027	0.408257	0.145503	0.884314	0.985929		k__Bacteria; p__Bacteroidetes; c__Bacteroidia; o__Bacteroidales; f__Prevotellaceae; g__Prevotella; s__pallens	18.449	-0.458011	0.554758	-0.825605	0.409028	0.87573
k__Bacteria; p__Bacteroidetes; c__Flavobacteriia; o__Flavobacteriales; f__Flavobacteriaceae; g__Bergeyella; s__sp._oral_taxon_322	2.62487	0.378838	0.353689	1.07111	0.284121	0.740745		k__Bacteria; p__Firmicutes; c__Clostridia; o__Clostridiales; f__Peptoniphilaceae; g__Peptoniphilaceae_[G-1]; s__sp._oral_taxon_113	1.24015	0.597553	0.386821	1.54478	0.1224	0.948		k__Bacteria; p__Spirochaetes; c__Spirochaetia; o__Spirochaetales; f__Spirochaetaceae; g__Treponema; s__vincentii	1.11846	-0.0627026	0.411511	-0.152372	0.878894	0.985929		k__Bacteria; p__Firmicutes; c__Clostridia; o__Clostridiales; f__Lachnospiraceae_[XIV]; g__Oribacterium; s__parvum	4.10138	0.492976	0.521078	0.946068	0.344114	0.87573
k__Bacteria; p__Firmicutes; c__Bacilli; o__Lactobacillales; f__Streptococcaceae; g__Streptococcus; s__multispecies_spp41_3	4.41248	0.433608	0.385047	1.12612	0.260116	0.740745		k__Bacteria; p__Fusobacteria; c__Fusobacteriia; o__Fusobacteriales; f__Leptotrichiaceae; g__Leptotrichia; s__multispecies_sppn1_2_nov_97.99%	1.23869	0.341444	0.393648	0.867383	0.385732	0.970945		k__Bacteria; p__Firmicutes; c__Bacilli; o__Lactobacillales; f__Streptococcaceae; g__Streptococcus; s__vestibularis	1.08863	0.0432722	0.417493	0.103648	0.917449	0.985929		k__Bacteria; p__Bacteroidetes; c__Bacteroidia; o__Bacteroidales; f__Prevotellaceae; g__Prevotella; s__veroralis	3.51058	0.448708	0.520816	0.861547	0.388937	0.87573
k__Bacteria; p__Bacteroidetes; c__Bacteroidia; o__Bacteroidales; f__Prevotellaceae; g__Alloprevotella; s__rava	2.115	-0.423265	0.368682	-1.14805	0.250949	0.740745		k__Bacteria; p__Bacteroidetes; c__Flavobacteriia; o__Flavobacteriales; f__Flavobacteriaceae; g__Bergeyella; s__sp._oral_taxon_907_nov_97.42%	1.17721	-0.150571	0.415367	-0.362501	0.716977	0.970945		k__Bacteria; p__Firmicutes; c__Bacilli; o__Lactobacillales; f__Streptococcaceae; g__Streptococcus; s__multispecies_spp1_2	14.5116	-0.13351	0.434557	-0.307232	0.758667	0.985929		k__Bacteria; p__Firmicutes; c__Clostridia; o__Clostridiales; f__Lachnospiraceae_[XIV]; g__Oribacterium; s__asaccharolyticum	5.08669	0.406447	0.528057	0.769703	0.441476	0.87573
k__Bacteria; p__Bacteroidetes; c__Flavobacteriia; o__Flavobacteriales; f__Flavobacteriaceae; g__Capnocytophaga; s__sp._oral_taxon_863	1.83532	-0.40341	0.381104	-1.05853	0.289813	0.742328		k__Bacteria; p__Proteobacteria; c__Betaproteobacteria; o__Neisseriales; f__Neisseriaceae; g__Neisseria; s__sp._oral_taxon_018_nov_97.67%	1.17721	-0.150571	0.415367	-0.362501	0.716977	0.970945		k__Bacteria; p__Firmicutes; c__Bacilli; o__Lactobacillales; f__Streptococcaceae; g__Streptococcus; s__multispecies_spp2_4	1.12011	0.0851909	0.41631	0.204633	0.837858	0.985929		k__Bacteria; p__Firmicutes; c__Clostridia; o__Clostridiales; f__Lachnospiraceae_[XIV]; g__Lachnospiraceae_[G-3]; s__sp._oral_taxon_100	1.62756	0.483001	0.46118	1.04732	0.294954	0.87573
k__Bacteria; p__Spirochaetes; c__Spirochaetia; o__Spirochaetales; f__Spirochaetaceae; g__Treponema; s__denticola	1.83663	0.378849	0.366297	1.03427	0.301012	0.757719		k__Bacteria; p__Bacteroidetes; c__Flavobacteriia; o__Flavobacteriales; f__Flavobacteriaceae; g__Capnocytophaga; s__multispecies_sppn1_2_nov_96.35%	1.17962	0.424705	0.395969	1.07257	0.283464	0.970945		k__Bacteria; p__Firmicutes; c__Bacilli; o__Lactobacillales; f__Streptococcaceae; g__Streptococcus; s__salivarius	1.1496	-0.0204392	0.410343	-0.0498101	0.960274	0.985929		k__Bacteria; p__Bacteroidetes; c__Bacteroidia; o__Bacteroidales; f__Prevotellaceae; g__Prevotella; s__shahii	3.44429	0.500939	0.510132	0.981978	0.32611	0.87573
k__Bacteria; p__Actinobacteria; c__Actinobacteria; o__Corynebacteriales; f__Corynebacteriaceae; g__Corynebacterium; s__matruchotii	3.17425	0.378475	0.373063	1.01451	0.310341	0.767963		k__Bacteria; p__Firmicutes; c__Clostridia; o__Clostridiales; f__multifamily; g__multigenus; s__multispecies_sppn1_2_nov_96.21%	1.11841	0.0798544	0.41198	0.193831	0.846308	0.970945		k__Bacteria; p__Actinobacteria; c__Actinobacteria; o__Actinomycetales; f__Actinomycetaceae; g__Actinomyces; s__sp._oral_taxon_169	1.5668	0.0955138	0.389513	0.245213	0.806291	0.985929		k__Bacteria; p__Saccharibacteria_(TM7); c__TM7_[C-1]; o__TM7_[O-1]; f__TM7_[F-1]; g__TM7_[G-1]; s__sp._oral_taxon_348	1.68312	0.582844	0.45509	1.28072	0.200291	0.87573
k__Bacteria; p__Bacteroidetes; c__Bacteroidia; o__Bacteroidales; f__Prevotellaceae; g__Prevotella; s__nanceiensis	15.4823	-0.414461	0.427624	-0.969218	0.332436	0.808928		k__Bacteria; p__Firmicutes; c__Negativicutes; o__Selenomonadales; f__Sporomusaceae; g__multigenus; s__multispecies_sppn1_2_nov_87.50%	1.11905	0.0798448	0.411984	0.193805	0.846328	0.970945		k__Bacteria; p__Proteobacteria; c__Betaproteobacteria; o__Burkholderiales; f__Burkholderiaceae; g__Lautropia; s__mirabilis	18.8571	0.311444	0.443492	0.702253	0.482521	0.985929		k__Bacteria; p__Proteobacteria; c__Betaproteobacteria; o__Neisseriales; f__Neisseriaceae; g__Neisseria; s__sp._oral_taxon_018	1.69443	-0.459197	0.540192	-0.850062	0.39529	0.87573
k__Bacteria; p__Proteobacteria; c__Betaproteobacteria; o__Burkholderiales; f__Burkholderiaceae; g__Lautropia; s__mirabilis	18.8571	0.396311	0.415967	0.952747	0.340718	0.81059		k__Bacteria; p__Bacteroidetes; c__Bacteroidia; o__Bacteroidales; f__Prevotellaceae; g__Prevotella; s__denticola	1.38634	-0.381639	0.410515	-0.92966	0.352547	0.970945		k__Bacteria; p__Firmicutes; c__Negativicutes; o__Selenomonadales; f__Veillonellaceae; g__Selenomonas; s__sp._oral_taxon_149	1.14845	-0.0206326	0.410324	-0.0502838	0.959896	0.985929		k__Bacteria; p__Bacteroidetes; c__Bacteroidia; o__Bacteroidales; f__Porphyromonadaceae; g__Porphyromonas; s__gingivalis	3.18284	-0.534862	0.53818	-0.993834	0.320303	0.87573
k__Bacteria; p__Proteobacteria; c__Epsilonproteobacteria; o__Campylobacterales; f__Campylobacteraceae; g__Campylobacter; s__multispecies_spp7_2	2.05368	0.342742	0.368489	0.93013	0.352304	0.81059		k__Bacteria; p__Bacteroidetes; c__Bacteroidia; o__Bacteroidales; f__Prevotellaceae; g__Prevotella; s__nigrescens	1.93406	-0.234989	0.391876	-0.599651	0.548739	0.970945		k__Bacteria; p__Firmicutes; c__Negativicutes; o__Selenomonadales; f__Veillonellaceae; g__Selenomonas; s__multispecies_spp3_2	2.54034	-0.128193	0.40829	-0.313976	0.753539	0.985929		k__Bacteria; p__Proteobacteria; c__Gammaproteobacteria; o__Pasteurellales; f__Pasteurellaceae; g__Haemophilus; s__pittmaniae	1.56511	0.367435	0.474002	0.775176	0.438236	0.87573
k__Bacteria; p__Bacteroidetes; c__Bacteroidia; o__Bacteroidales; f__Prevotellaceae; g__Prevotella; s__histicola	88.6828	0.43047	0.47326	0.909584	0.363042	0.81059		k__Bacteria; p__Saccharibacteria_(TM7); c__TM7_[C-1]; o__TM7_[O-1]; f__TM7_[F-1]; g__TM7_[G-2]; s__sp._oral_taxon_350	1.43986	-0.292098	0.413905	-0.705713	0.480367	0.970945		k__Bacteria; p__Firmicutes; c__Negativicutes; o__Selenomonadales; f__Veillonellaceae; g__Selenomonas; s__sp._oral_taxon_136	2.55669	-0.108307	0.400865	-0.270184	0.787019	0.985929		k__Bacteria; p__Saccharibacteria_(TM7); c__TM7_[C-1]; o__TM7_[O-1]; f__TM7_[F-1]; g__TM7_[G-1]; s__sp._oral_taxon_349	2.15169	-0.522112	0.523104	-0.998102	0.31823	0.87573
k__Bacteria; p__Firmicutes; c__Bacilli; o__Bacillales; f__Gemellaceae; g__Gemella; s__sanguinis	8.83027	0.347054	0.376055	0.922882	0.356068	0.81059		k__Bacteria; p__Proteobacteria; c__Betaproteobacteria; o__Neisseriales; f__Neisseriaceae; g__Neisseria; s__cinerea	1.38694	-0.381431	0.410788	-0.928535	0.35313	0.970945		k__Bacteria; p__Bacteroidetes; c__Bacteroidia; o__Bacteroidales; f__Prevotellaceae; g__Prevotella; s__nanceiensis	15.4823	-0.492432	0.452158	-1.08907	0.276122	0.985929		k__Bacteria; p__Firmicutes; c__Negativicutes; o__Selenomonadales; f__Veillonellaceae; g__Veillonella; s__multispecies_spp29_2	37.2557	-0.523339	0.55617	-0.940969	0.346721	0.87573
k__Bacteria; p__Proteobacteria; c__Betaproteobacteria; o__Neisseriales; f__Neisseriaceae; g__Neisseria; s__subflava	270.327	0.416192	0.460808	0.903179	0.366431	0.81059		k__Bacteria; p__Proteobacteria; c__Gammaproteobacteria; o__Cardiobacteriales; f__Cardiobacteriaceae; g__Cardiobacterium; s__valvarum	2.06019	-0.518183	0.423077	-1.2248	0.220652	0.970945		k__Bacteria; p__Bacteroidetes; c__Bacteroidia; o__Bacteroidales; f__Prevotellaceae; g__Prevotella; s__multispecies_spp5_2	3.33377	0.125882	0.402414	0.312818	0.754419	0.985929		k__Bacteria; p__Actinobacteria; c__Actinobacteria; o__Corynebacteriales; f__Corynebacteriaceae; g__Corynebacterium; s__matruchotii	3.17425	-0.579611	0.520858	-1.1128	0.265794	0.87573
k__Bacteria; p__Bacteroidetes; c__Bacteroidia; o__Bacteroidales; f__Prevotellaceae; g__Prevotella; s__sp._oral_taxon_313	2.56834	0.360224	0.382824	0.940964	0.346723	0.81059		k__Bacteria; p__Firmicutes; c__Bacilli; o__Bacillales; f__NA; g__Gemella; s__parahaemolysans	1.99453	-0.467965	0.422681	-1.10714	0.268235	0.970945		k__Bacteria; p__Firmicutes; c__Negativicutes; o__Selenomonadales; f__Veillonellaceae; g__Selenomonas; s__sputigena	2.93337	0.490494	0.412172	1.19002	0.234037	0.985929		k__Bacteria; p__Firmicutes; c__Bacilli; o__Lactobacillales; f__Streptococcaceae; g__Streptococcus; s__multispecies_spp33_2	4.97436	-0.494156	0.517876	-0.954196	0.339984	0.87573
k__Bacteria; p__Actinobacteria; c__Actinobacteria; o__Actinomycetales; f__Actinomycetaceae; g__Actinomyces; s__odontolyticus	6.4613	-0.345592	0.390691	-0.884566	0.376391	0.819721		k__Bacteria; p__Spirochaetes; c__Spirochaetia; o__Spirochaetales; f__Spirochaetaceae; g__Treponema; s__medium	1.20756	-0.186619	0.414372	-0.450366	0.652446	0.970945		k__Bacteria; p__Actinobacteria; c__Actinobacteria; o__Actinomycetales; f__Actinomycetaceae; g__Actinomyces; s__sp._oral_taxon_180	1.3003	0.309175	0.411849	0.750699	0.452834	0.985929		k__Bacteria; p__Firmicutes; c__Negativicutes; o__Selenomonadales; f__Veillonellaceae; g__Selenomonas; s__artemidis	1.59708	-0.460626	0.513531	-0.896977	0.369731	0.87573
k__Bacteria; p__Bacteroidetes; c__Bacteroidia; o__Bacteroidales; f__Porphyromonadaceae; g__Tannerella; s__forsythia	2.25332	0.310588	0.359063	0.864996	0.387041	0.819721		k__Bacteria; p__Spirochaetes; c__Spirochaetia; o__Spirochaetales; f__Spirochaetaceae; g__Treponema; s__vincentii	1.11846	-0.0751482	0.417496	-0.179997	0.857155	0.970945		k__Bacteria; p__Actinobacteria; c__Actinobacteria; o__Actinomycetales; f__Actinomycetaceae; g__Actinomyces; s__multispecies_spp6_2	1.90302	-0.17936	0.378339	-0.474072	0.635448	0.985929		k__Bacteria; p__Firmicutes; c__Clostridia; o__Clostridiales; f__Lachnospiraceae_[XIV]; g__Lachnospiraceae_[G-2]; s__sp._oral_taxon_096	2.53697	0.425591	0.52446	0.811484	0.417088	0.87573
k__Bacteria; p__Proteobacteria; c__Gammaproteobacteria; o__Pasteurellales; f__Pasteurellaceae; g__Haemophilus; s__sp._Oral_Taxon_C82	1.89063	0.309052	0.357559	0.864338	0.387402	0.819721		k__Bacteria; p__Firmicutes; c__Bacilli; o__Lactobacillales; f__Streptococcaceae; g__Streptococcus; s__vestibularis	1.08863	-0.035596	0.418707	-0.0850141	0.93225	0.970945		k__Bacteria; p__Actinobacteria; c__Actinobacteria; o__Actinomycetales; f__Actinomycetaceae; g__Actinomyces; s__odontolyticus	8.13002	0.415337	0.438925	0.94626	0.344016	0.985929		k__Bacteria; p__Saccharibacteria_(TM7); c__TM7_[C-1]; o__TM7_[O-1]; f__TM7_[F-2]; g__TM7_[G-5]; s__sp._oral_taxon_356	1.99849	-0.432812	0.53136	-0.814536	0.415338	0.87573
k__Bacteria; p__Proteobacteria; c__Betaproteobacteria; o__Neisseriales; f__Neisseriaceae; g__Neisseria; s__oralis	7.64639	0.382634	0.450958	0.848491	0.396165	0.826287		k__Bacteria; p__Firmicutes; c__Bacilli; o__Lactobacillales; f__Streptococcaceae; g__Streptococcus; s__multispecies_spp2_4	1.12011	0.0798163	0.411993	0.193732	0.846386	0.970945		k__Bacteria; p__Fusobacteria; c__Fusobacteriia; o__Fusobacteriales; f__Leptotrichiaceae; g__Leptotrichia; s__hofstadii	3.287	-0.0343165	0.425154	-0.0807154	0.935668	0.985929		k__Bacteria; p__Firmicutes; c__Bacilli; o__Lactobacillales; f__Streptococcaceae; g__Streptococcus; s__anginosus	1.62368	0.480106	0.463455	1.03593	0.300235	0.87573
k__Bacteria; p__Firmicutes; c__Clostridia; o__Clostridiales; f__Lachnospiraceae_[XIV]; g__Oribacterium; s__parvum	4.10138	0.325857	0.395477	0.82396	0.409962	0.831312		k__Bacteria; p__Firmicutes; c__Bacilli; o__Lactobacillales; f__Streptococcaceae; g__Streptococcus; s__salivarius	1.1496	-0.11349	0.41638	-0.272562	0.78519	0.970945		k__Bacteria; p__Synergistetes; c__Synergistia; o__Synergistales; f__Synergistaceae; g__Fretibacterium; s__fastidiosum	1.62674	0.0449884	0.387127	0.116211	0.907485	0.985929		k__Bacteria; p__Fusobacteria; c__Fusobacteriia; o__Fusobacteriales; f__Leptotrichiaceae; g__Leptotrichia; s__sp._oral_taxon_498	2.32464	-0.552536	0.538587	-1.0259	0.304939	0.87573
k__Bacteria; p__Proteobacteria; c__Betaproteobacteria; o__Neisseriales; f__Neisseriaceae; g__Kingella; s__oralis	2.04356	-0.298415	0.361185	-0.826211	0.408684	0.831312		k__Bacteria; p__Actinobacteria; c__Actinobacteria; o__Actinomycetales; f__Actinomycetaceae; g__Actinomyces; s__sp._oral_taxon_169	1.5668	0.190025	0.380781	0.49904	0.617751	0.970945		k__Bacteria; p__Firmicutes; c__Negativicutes; o__Selenomonadales; f__Veillonellaceae; g__Selenomonas; s__noxia	2.90064	-0.179778	0.413868	-0.434384	0.664009	0.985929		k__Bacteria; p__Saccharibacteria_(TM7); c__TM7_[C-1]; o__TM7_[O-1]; f__TM7_[F-1]; g__TM7_[G-1]; s__sp._oral_taxon_347	1.83771	0.443336	0.4791	0.925352	0.354783	0.87573
k__Bacteria; p__Firmicutes; c__Negativicutes; o__Selenomonadales; f__Veillonellaceae; g__Selenomonas; s__noxia	2.90064	0.301464	0.387858	0.777253	0.437009	0.874019		k__Bacteria; p__Actinobacteria; c__Actinobacteria; o__Actinomycetales; f__Actinomycetaceae; g__Actinomyces; s__sp._oral_taxon_172	7.15846	0.37454	0.448046	0.835942	0.403188	0.970945		k__Bacteria; p__Proteobacteria; c__Gammaproteobacteria; o__Pasteurellales; f__Pasteurellaceae; g__Aggregatibacter; s__sp._oral_taxon_458	2.99684	0.140928	0.420993	0.334752	0.737813	0.985929		k__Bacteria; p__Firmicutes; c__Negativicutes; o__Selenomonadales; f__Veillonellaceae; g__Veillonella; s__sp._oral_taxon_780	1.5377	-0.420491	0.513665	-0.818608	0.41301	0.87573
k__Bacteria; p__Bacteroidetes; c__Bacteroidia; o__Bacteroidales; f__Prevotellaceae; g__Prevotella; s__pallens	14.2874	-0.33233	0.433608	-0.766428	0.443421	0.874858		k__Bacteria; p__Firmicutes; c__Negativicutes; o__Selenomonadales; f__Veillonellaceae; g__Selenomonas; s__sp._oral_taxon_149	1.14845	0.0398659	0.410786	0.0970477	0.922688	0.970945		k__Bacteria; p__Fusobacteria; c__Fusobacteriia; o__Fusobacteriales; f__Leptotrichiaceae; g__Leptotrichia; s__sp._oral_taxon_218	1.4495	-0.26184	0.386472	-0.677513	0.49808	0.985929		k__Bacteria; p__SR1; c__SR1_[C-1]; o__SR1_[O-1]; f__SR1_[F-1]; g__SR1_[G-1]; s__sp._oral_taxon_345	1.9665	-0.661801	0.516566	-1.28115	0.20014	0.87573
k__Bacteria; p__Firmicutes; c__Bacilli; o__Lactobacillales; f__Streptococcaceae; g__Streptococcus; s__multispecies_spp17_2	2.44572	-0.272075	0.38506	-0.706578	0.479829	0.893465		k__Bacteria; p__Firmicutes; c__Negativicutes; o__Selenomonadales; f__Veillonellaceae; g__Selenomonas; s__multispecies_spp3_2	2.54034	-0.328528	0.41958	-0.782992	0.433632	0.970945		k__Bacteria; p__Fusobacteria; c__Fusobacteriia; o__Fusobacteriales; f__Leptotrichiaceae; g__Leptotrichia; s__shahii	1.62774	-0.164054	0.378735	-0.433163	0.664896	0.985929		k__Bacteria; p__Fusobacteria; c__Fusobacteria; o__Fusobacteria_[O]; f__Fusobacteria_[F]; g__Fusobacteria_[G-1]; s__sp._Oral_Taxon_A71	1.80533	-0.523359	0.538692	-0.971536	0.331281	0.87573
k__Bacteria; p__Bacteroidetes; c__Bacteroidia; o__Bacteroidales; f__Porphyromonadaceae; g__Porphyromonas; s__sp._oral_taxon_278	2.07342	-0.250071	0.371209	-0.673666	0.500524	0.893465		k__Bacteria; p__Bacteroidetes; c__Bacteroidia; o__Bacteroidales; f__Prevotellaceae; g__Prevotella; s__nanceiensis	15.4823	0.180881	0.454802	0.397712	0.690842	0.970945		k__Bacteria; p__Proteobacteria; c__Epsilonproteobacteria; o__Campylobacterales; f__Campylobacteraceae; g__Campylobacter; s__multispecies_spp7_2	2.05368	-0.206985	0.393463	-0.526059	0.598847	0.985929		k__Bacteria; p__Fusobacteria; c__Fusobacteriia; o__Fusobacteriales; f__Leptotrichiaceae; g__Leptotrichia; s__sp._oral_taxon_463	1.51008	-0.397907	0.515169	-0.772383	0.439888	0.87573
k__Bacteria; p__Firmicutes; c__Bacilli; o__Lactobacillales; f__Streptococcaceae; g__Streptococcus; s__multispecies_spp24_14	66.7919	-0.244587	0.352254	-0.694349	0.487464	0.893465		k__Bacteria; p__Bacteroidetes; c__Bacteroidia; o__Bacteroidales; f__Prevotellaceae; g__Prevotella; s__multispecies_spp5_2	4.63616	-0.193772	0.439615	-0.440777	0.659374	0.970945		k__Bacteria; p__Proteobacteria; c__Epsilonproteobacteria; o__Campylobacterales; f__Campylobacteraceae; g__Campylobacter; s__showae	1.08868	0.0432746	0.417493	0.103653	0.917444	0.985929		k__Bacteria; p__Proteobacteria; c__Betaproteobacteria; o__Neisseriales; f__Neisseriaceae; g__Neisseria; s__elongata	10.2176	-0.510187	0.55408	-0.920783	0.357164	0.87573
k__Bacteria; p__Fusobacteria; c__Fusobacteriia; o__Fusobacteriales; f__Leptotrichiaceae; g__Leptotrichia; s__hongkongensis	3.11572	-0.294923	0.398404	-0.74026	0.459143	0.893465		k__Bacteria; p__Bacteroidetes; c__Flavobacteriia; o__Flavobacteriales; f__Flavobacteriaceae; g__Capnocytophaga; s__sp._oral_taxon_902	1.50391	-0.473425	0.426013	-1.11129	0.266442	0.970945		k__Bacteria; p__Firmicutes; c__Clostridia; o__Clostridiales; f__Peptostreptococcaceae_[XI]; g__Peptostreptococcus; s__stomatis	3.89904	0.504045	0.415848	1.21209	0.225478	0.985929		k__Bacteria; p__Proteobacteria; c__Gammaproteobacteria; o__Pasteurellales; f__Pasteurellaceae; g__Haemophilus; s__sputorum	1.50624	-0.400441	0.51312	-0.780404	0.435153	0.87573
k__Bacteria; p__Fusobacteria; c__Fusobacteriia; o__Fusobacteriales; f__Leptotrichiaceae; g__Leptotrichia; s__sp._oral_taxon_212	3.14791	0.267206	0.37194	0.718413	0.472502	0.893465		k__Bacteria; p__Firmicutes; c__Negativicutes; o__Selenomonadales; f__Veillonellaceae; g__Selenomonas; s__sputigena	2.93337	-0.314474	0.415676	-0.756535	0.449329	0.970945		k__Bacteria; p__Bacteroidetes; c__Bacteroidia; o__Bacteroidales; f__Prevotellaceae; g__Prevotella; s__scopos	1.61241	0.60454	0.410459	1.47284	0.140794	0.985929		k__Bacteria; p__Bacteroidetes; c__Flavobacteriia; o__Flavobacteriales; f__Flavobacteriaceae; g__Capnocytophaga; s__sp._oral_taxon_863	1.83532	-0.573838	0.526442	-1.09003	0.275699	0.87573
k__Bacteria; p__Bacteroidetes; c__Bacteroidia; o__Bacteroidales; f__Prevotellaceae; g__Alloprevotella; s__tannerae	4.88523	-0.284852	0.424111	-0.671646	0.501809	0.893465		k__Bacteria; p__Actinobacteria; c__Actinobacteria; o__Actinomycetales; f__Actinomycetaceae; g__Actinomyces; s__odontolyticus	8.13002	-0.617639	0.440189	-1.40312	0.16058	0.970945		k__Bacteria; p__Fusobacteria; c__Fusobacteriia; o__Fusobacteriales; f__Leptotrichiaceae; g__Leptotrichia; s__sp._oral_taxon_215	7.49667	0.410025	0.456697	0.897805	0.36929	0.985929		k__Bacteria; p__Firmicutes; c__Clostridia; o__Clostridiales; f__Peptostreptococcaceae_[XI]; g__Peptostreptococcaceae_[XI][G-9]; s__[Eubacterium]_brachy	1.41305	0.507762	0.466421	1.08863	0.276316	0.87573
k__Bacteria; p__Firmicutes; c__Negativicutes; o__Selenomonadales; f__Veillonellaceae; g__Megasphaera; s__micronuciformis	30.5028	-0.316291	0.456279	-0.693196	0.488187	0.893465		k__Bacteria; p__Fusobacteria; c__Fusobacteriia; o__Fusobacteriales; f__Leptotrichiaceae; g__Leptotrichia; s__hofstadii	3.287	-0.45265	0.432591	-1.04637	0.295391	0.970945		k__Bacteria; p__Fusobacteria; c__Fusobacteriia; o__Fusobacteriales; f__Leptotrichiaceae; g__Leptotrichia; s__multispecies_spp8_2	1.119	0.0851363	0.416297	0.204509	0.837956	0.985929		k__Bacteria; p__Bacteroidetes; c__Flavobacteriia; o__Flavobacteriales; f__Flavobacteriaceae; g__Capnocytophaga; s__sp._oral_taxon_326	2.07426	-0.670274	0.532213	-1.25941	0.207882	0.87573
k__Bacteria; p__Fusobacteria; c__Fusobacteriia; o__Fusobacteriales; f__Leptotrichiaceae; g__Leptotrichia; s__sp._oral_taxon_417	44.1256	0.296255	0.440503	0.672539	0.501241	0.893465		k__Bacteria; p__Synergistetes; c__Synergistia; o__Synergistales; f__Synergistaceae; g__Fretibacterium; s__fastidiosum	1.62674	-0.0947022	0.389493	-0.243142	0.807895	0.970945		k__Bacteria; p__Fusobacteria; c__Fusobacteria; o__Fusobacteriales; f__Fusobacteriaceae; g__Fusobacterium; s__nucleatum_ss_animalis	1.65898	0.183488	0.390223	0.470214	0.638202	0.985929		k__Bacteria; p__Proteobacteria; c__Betaproteobacteria; o__Neisseriales; f__Neisseriaceae; g__Neisseria; s__multispecies_spp39_2	21.431	-0.576457	0.553948	-1.04063	0.298045	0.87573
k__Bacteria; p__Firmicutes; c__Clostridia; o__Clostridiales; f__Lachnospiraceae_[XIV]; g__Catonella; s__morbi	3.07963	0.248522	0.37972	0.654487	0.512798	0.90203		k__Bacteria; p__Firmicutes; c__Negativicutes; o__Selenomonadales; f__Veillonellaceae; g__Selenomonas; s__noxia	2.90064	-0.578385	0.426888	-1.35489	0.175454	0.970945		k__Bacteria; p__Fusobacteria; c__Fusobacteriia; o__Fusobacteriales; f__Fusobacteriaceae; g__Fusobacterium; s__multispecies_spp9_3	1.11718	-0.0628232	0.411494	-0.152671	0.878658	0.985929		k__Bacteria; p__Firmicutes; c__Negativicutes; o__Selenomonadales; f__Veillonellaceae; g__Megasphaera; s__micronuciformis	30.5028	-0.517323	0.556746	-0.92919	0.352791	0.87573
k__Bacteria; p__Firmicutes; c__Bacilli; o__Bacillales; f__NA; g__Gemella; s__parahaemolysans	1.99453	0.202095	0.383128	0.527487	0.597855	0.930476		k__Bacteria; p__Fusobacteria; c__Fusobacteriia; o__Fusobacteriales; f__Leptotrichiaceae; g__Leptotrichia; s__sp._oral_taxon_218	1.4495	-0.16624	0.399494	-0.416126	0.677318	0.970945		k__Bacteria; p__multiphylum; c__multiclass; o__multiorder; f__'Fusobacteriaceae'; g__Fusobacterium; s__multispecies_spp10_5	1.23784	-0.170544	0.398921	-0.427515	0.669005	0.985929		k__Bacteria; p__Proteobacteria; c__Epsilonproteobacteria; o__Campylobacterales; f__Campylobacteraceae; g__Campylobacter; s__concisus	9.38344	-0.501883	0.52569	-0.954712	0.339723	0.87573
k__Bacteria; p__Firmicutes; c__Negativicutes; o__Selenomonadales; f__Veillonellaceae; g__Selenomonas; s__sp._oral_taxon_136	2.55669	0.199295	0.374607	0.53201	0.594719	0.930476		k__Bacteria; p__Fusobacteria; c__Fusobacteriia; o__Fusobacteriales; f__Leptotrichiaceae; g__Leptotrichia; s__shahii	1.62774	-0.0951795	0.388018	-0.245297	0.806227	0.970945		k__Bacteria; p__Fusobacteria; c__Fusobacteriia; o__Fusobacteriales; f__Fusobacteriaceae; g__Fusobacterium; s__sp._oral_taxon_203	2.96418	0.238041	0.43318	0.549519	0.582649	0.985929		k__Bacteria; p__Firmicutes; c__Negativicutes; o__Selenomonadales; f__Veillonellaceae; g__Veillonella; s__atypica	33.3171	-0.425486	0.556429	-0.764673	0.444466	0.87573
k__Bacteria; p__Bacteroidetes; c__Bacteroidia; o__Bacteroidales; f__Prevotellaceae; g__Prevotella; s__multispecies_spp5_2	3.33377	0.215124	0.373452	0.576041	0.564587	0.930476		k__Bacteria; p__Proteobacteria; c__Epsilonproteobacteria; o__Campylobacterales; f__Campylobacteraceae; g__Campylobacter; s__multispecies_spp7_2	2.05368	0.377576	0.391626	0.964125	0.334983	0.970945		k__Bacteria; p__Fusobacteria; c__Fusobacteriia; o__Fusobacteriales; f__Fusobacteriaceae; g__Fusobacterium; s__multispecies_spp11_4	1.11895	-0.206013	0.407313	-0.505785	0.613007	0.985929		k__Bacteria; p__Firmicutes; c__Negativicutes; o__Selenomonadales; f__Veillonellaceae; g__Veillonella; s__dispar	1.63665	-0.481715	0.51292	-0.939162	0.347647	0.87573
k__Bacteria; p__Bacteroidetes; c__Flavobacteriia; o__Flavobacteriales; f__Flavobacteriaceae; g__Capnocytophaga; s__granulosa	6.08586	0.22633	0.407698	0.555142	0.578797	0.930476		k__Bacteria; p__Proteobacteria; c__Epsilonproteobacteria; o__Campylobacterales; f__Campylobacteraceae; g__Campylobacter; s__showae	1.08868	0.121123	0.413271	0.293084	0.769458	0.970945		k__Bacteria; p__Fusobacteria; c__Fusobacteriia; o__Fusobacteriales; f__Fusobacteriaceae; g__Fusobacterium; s__sp._oral_taxon_370	1.53418	0.0641459	0.391433	0.163874	0.86983	0.985929		k__Bacteria; p__Proteobacteria; c__Betaproteobacteria; o__Neisseriales; f__Neisseriaceae; g__Neisseria; s__mucosa	1.87	-0.547457	0.540397	-1.01306	0.311029	0.87573
k__Bacteria; p__Bacteroidetes; c__Bacteroidia; o__Bacteroidales; f__Porphyromonadaceae; g__Tannerella; s__sp._oral_taxon_286	2.20114	0.181876	0.354262	0.513394	0.607676	0.930476		k__Bacteria; p__Bacteroidetes; c__Bacteroidia; o__Bacteroidales; f__Prevotellaceae; g__Prevotella; s__scopos	1.61241	-0.437023	0.405661	-1.07731	0.281342	0.970945		k__Bacteria; p__Firmicutes; c__Bacilli; o__Lactobacillales; f__Streptococcaceae; g__Streptococcus; s__multispecies_spp12_3	3.19457	-0.189906	0.390061	-0.486862	0.626356	0.985929		k__Bacteria; p__Proteobacteria; c__Betaproteobacteria; o__Neisseriales; f__Neisseriaceae; g__Neisseria; s__multispecies_spp42_4	11.5046	-0.678348	0.548319	-1.23714	0.216035	0.87573
k__Bacteria; p__Firmicutes; c__Clostridia; o__Clostridiales; f__Lachnospiraceae_[XIV]; g__Lachnoanaerobaculum; s__umeaense	6.25822	0.204174	0.399459	0.511127	0.609262	0.930476		k__Bacteria; p__Fusobacteria; c__Fusobacteriia; o__Fusobacteriales; f__Leptotrichiaceae; g__Leptotrichia; s__sp._oral_taxon_215	7.49667	0.599219	0.452901	1.32307	0.185813	0.970945		k__Bacteria; p__Bacteroidetes; c__Bacteroidia; o__Bacteroidales; f__Prevotellaceae; g__Prevotella; s__sp._Oral_Taxon_299	1.70571	0.210637	0.394459	0.53399	0.593349	0.985929		k__Bacteria; p__Actinobacteria; c__Actinobacteria; o__Actinomycetales; f__Actinomycetaceae; g__Actinomyces; s__graevenitzii	5.5285	-0.509147	0.547276	-0.930329	0.352201	0.87573
k__Bacteria; p__Bacteroidetes; c__Bacteroidia; o__Bacteroidales; f__Porphyromonadaceae; g__Porphyromonas; s__pasteri	68.0815	0.247054	0.422545	0.58468	0.558763	0.930476		k__Bacteria; p__Fusobacteria; c__Fusobacteriia; o__Fusobacteriales; f__Leptotrichiaceae; g__Leptotrichia; s__multispecies_spp8_2	1.119	0.0798421	0.411984	0.193799	0.846333	0.970945		k__Bacteria; p__Firmicutes; c__Negativicutes; o__Selenomonadales; f__Veillonellaceae; g__Selenomonas; s__sp._oral_taxon_126	1.44427	0.0853564	0.394951	0.216119	0.828895	0.985929		k__Bacteria; p__Fusobacteria; c__Fusobacteriia; o__Fusobacteriales; f__Leptotrichiaceae; g__Leptotrichia; s__sp._oral_taxon_417	44.1256	-0.651409	0.552797	-1.17839	0.238642	0.87573
k__Bacteria; p__Firmicutes; c__Clostridia; o__Clostridiales; f__Peptoniphilaceae; g__Parvimonas; s__micra	2.60759	0.198267	0.369976	0.535891	0.592034	0.930476		k__Bacteria; p__Fusobacteria; c__Fusobacteria; o__Fusobacteriales; f__Fusobacteriaceae; g__Fusobacterium; s__nucleatum_ss_animalis	1.65898	-0.122548	0.389505	-0.314624	0.753047	0.970945		k__Bacteria; p__Firmicutes; c__Bacilli; o__Lactobacillales; f__Carnobacteriaceae; g__Granulicatella; s__elegans	2.37637	0.330482	0.418163	0.790318	0.429342	0.985929		k__Bacteria; p__Actinobacteria; c__Actinobacteria; o__Actinomycetales; f__Micrococcaceae; g__Rothia; s__aeria	19.7146	-0.659422	0.555371	-1.18735	0.235088	0.87573
k__Bacteria; p__Bacteroidetes; c__Bacteroidia; o__Bacteroidales; f__Prevotellaceae; g__Prevotella; s__sp._oral_taxon_443	1.84056	0.225338	0.367437	0.613269	0.539698	0.930476		k__Bacteria; p__Fusobacteria; c__Fusobacteriia; o__Fusobacteriales; f__Fusobacteriaceae; g__Fusobacterium; s__multispecies_spp9_3	1.11718	-0.0751255	0.417487	-0.179947	0.857194	0.970945		k__Bacteria; p__Proteobacteria; c__Betaproteobacteria; o__Neisseriales; f__Neisseriaceae; g__Neisseria; s__multispecies_spp13_2	1.35557	-0.0178045	0.398139	-0.0447193	0.964331	0.985929		k__Bacteria; p__Fusobacteria; c__Fusobacteriia; o__Fusobacteriales; f__Leptotrichiaceae; g__Leptotrichia; s__sp._oral_taxon_221	11.097	0.530366	0.552949	0.959159	0.337479	0.87573
k__Bacteria; p__Actinobacteria; c__Actinobacteria; o__Actinomycetales; f__Micrococcaceae; g__Rothia; s__mucilaginosa	114.434	0.180445	0.355572	0.507478	0.61182	0.930476		k__Bacteria; p__multiphylum; c__multiclass; o__multiorder; f__'Fusobacteriaceae'; g__Fusobacterium; s__multispecies_spp10_5	1.23784	-0.221582	0.413513	-0.535852	0.592061	0.970945		k__Bacteria; p__Bacteroidetes; c__Bacteroidia; o__Bacteroidales; f__Prevotellaceae; g__Prevotella; s__oris	3.64062	-0.568569	0.401975	-1.41444	0.157233	0.985929		k__Bacteria; p__Bacteroidetes; c__Bacteroidia; o__Bacteroidales; f__Prevotellaceae; g__Alloprevotella; s__sp._oral_taxon_473	5.11572	-0.442798	0.546759	-0.80986	0.41802	0.87573
k__Bacteria; p__Proteobacteria; c__Betaproteobacteria; o__Neisseriales; f__Neisseriaceae; g__Neisseria; s__elongata	7.01837	-0.240868	0.419771	-0.573808	0.566098	0.930476		k__Bacteria; p__Fusobacteria; c__Fusobacteriia; o__Fusobacteriales; f__Fusobacteriaceae; g__Fusobacterium; s__sp._oral_taxon_203	2.96418	-0.077285	0.435184	-0.177591	0.859044	0.970945		k__Bacteria; p__Firmicutes; c__Bacilli; o__Bacillales; f__Gemellaceae; g__Gemella; s__morbillorum	1.14775	-0.0205977	0.410317	-0.0501995	0.959963	0.985929		k__Bacteria; p__Bacteroidetes; c__Flavobacteria; o__Flavobacteriales; f__Flavobacteriaceae; g__Capnocytophaga; s__sp._Oral_Taxon_A48	1.9704	-0.545582	0.549884	-0.992177	0.321111	0.87573
k__Bacteria; p__Firmicutes; c__Negativicutes; o__Selenomonadales; f__Veillonellaceae; g__Veillonella; s__rogosae	29.591	0.221823	0.427476	0.518913	0.603821	0.930476		k__Bacteria; p__Fusobacteria; c__Fusobacteriia; o__Fusobacteriales; f__Fusobacteriaceae; g__Fusobacterium; s__multispecies_spp11_4	1.11895	-0.0751563	0.417504	-0.180013	0.857142	0.970945		k__Bacteria; p__Firmicutes; c__Bacilli; o__Bacillales; f__Staphylococcaceae; g__Gemella; s__multispecies_spp14_2	1.11718	0.0850414	0.416277	0.20429	0.838127	0.985929		k__Bacteria; p__Fusobacteria; c__Fusobacteriia; o__Fusobacteriales; f__Fusobacteriaceae; g__Fusobacterium; s__multispecies_spp44_4	1.53681	-0.421316	0.513043	-0.821209	0.411527	0.87573
k__Bacteria; p__Saccharibacteria_(TM7); c__TM7_[C-1]; o__TM7_[O-1]; f__TM7_[F-1]; g__TM7_[G-6]; s__sp._oral_taxon_870	3.60732	0.245263	0.41288	0.59403	0.552492	0.930476		k__Bacteria; p__Fusobacteria; c__Fusobacteriia; o__Fusobacteriales; f__Fusobacteriaceae; g__Fusobacterium; s__sp._oral_taxon_370	1.53418	-0.253393	0.398691	-0.635562	0.525062	0.970945		k__Bacteria; p__Firmicutes; c__Bacilli; o__Lactobacillales; f__Streptococcaceae; g__Streptococcus; s__lactarius	4.95289	0.277321	0.406409	0.682371	0.495005	0.985929		k__Bacteria; p__Fusobacteria; c__Fusobacteriia; o__Fusobacteriales; f__Fusobacteriaceae; g__Fusobacterium; s__nucleatum_subsp._vincentii	1.50896	0.588521	0.460409	1.27826	0.201159	0.87573
k__Bacteria; p__Bacteroidetes; c__Bacteroidia; o__Bacteroidales; f__Prevotellaceae; g__Alloprevotella; s__sp._oral_taxon_473	4.19551	-0.205546	0.414404	-0.496005	0.619891	0.933032		k__Bacteria; p__Firmicutes; c__Negativicutes; o__Selenomonadales; f__Veillonellaceae; g__Selenomonas; s__sp._oral_taxon_126	1.44427	-0.165919	0.39864	-0.416212	0.677255	0.970945		k__Bacteria; p__Firmicutes; c__Bacilli; o__Lactobacillales; f__Streptococcaceae; g__Streptococcus; s__multispecies_spp15_2	1.39211	-0.2223	0.388267	-0.572543	0.566954	0.985929		k__Bacteria; p__Gracilibacteria_(GN02); c__GN02_[C-2]; o__GN02_[O-2]; f__GN02_[F-2]; g__GN02_[G-2]; s__sp._oral_taxon_873	1.86273	-0.608913	0.518431	-1.17453	0.240183	0.87573
k__Bacteria; p__Firmicutes; c__Bacilli; o__Lactobacillales; f__Streptococcaceae; g__Streptococcus; s__multispecies_spp12_3	3.19457	0.164264	0.365815	0.449036	0.653406	0.941573		k__Bacteria; p__Firmicutes; c__Bacilli; o__Lactobacillales; f__Carnobacteriaceae; g__Granulicatella; s__elegans	2.37637	0.577989	0.406654	1.42133	0.155221	0.970945		k__Bacteria; p__Firmicutes; c__Bacilli; o__Lactobacillales; f__Streptococcaceae; g__Streptococcus; s__peroris	1.44798	-0.0331599	0.390861	-0.0848381	0.93239	0.985929		k__Bacteria; p__Saccharibacteria(TM7); c__TM7_[C]; o__TM7_[O]; f__TM7_[F]; g__TM7_[G]; s__sp._Oral_Taxon_A56	9.7382	-0.712971	0.556192	-1.28188	0.199885	0.87573
k__Bacteria; p__Firmicutes; c__Bacilli; o__Lactobacillales; f__Streptococcaceae; g__Streptococcus; s__sp._oral_taxon_056	2.0459	-0.152801	0.352044	-0.434039	0.66426	0.941573		k__Bacteria; p__Proteobacteria; c__Betaproteobacteria; o__Neisseriales; f__Neisseriaceae; g__Neisseria; s__multispecies_spp13_2	1.35557	-0.350924	0.411523	-0.852744	0.393802	0.970945		k__Bacteria; p__Proteobacteria; c__Gammaproteobacteria; o__Pasteurellales; f__Pasteurellaceae; g__Haemophilus; s__parahaemolyticus	4.86516	-0.238591	0.453287	-0.526357	0.59864	0.985929		k__Bacteria; p__Bacteroidetes; c__Bacteroidia; o__Bacteroidales; f__Prevotellaceae; g__Prevotella; s__sp._oral_taxon_306	43.7405	-0.45856	0.552468	-0.83002	0.406528	0.87573
k__Bacteria; p__SR1; c__SR1_[C-1]; o__SR1_[O-1]; f__SR1_[F-1]; g__SR1_[G-1]; s__sp._oral_taxon_874	1.96461	0.166792	0.354826	0.470066	0.638308	0.941573		k__Bacteria; p__Firmicutes; c__Clostridia; o__Clostridiales; f__Lachnospiraceae_[XIV]; g__Catonella; s__morbi	4.59564	0.130648	0.446304	0.292733	0.769726	0.970945		k__Bacteria; p__Bacteroidetes; c__Bacteroidia; o__Bacteroidales; f__Prevotellaceae; g__Prevotella; s__sp._oral_taxon_304	1.97992	0.630298	0.424622	1.48438	0.137709	0.985929		k__Bacteria; p__Bacteroidetes; c__Bacteroidia; o__Bacteroidales; f__Prevotellaceae; g__Prevotella; s__oulorum	2.21841	-0.39272	0.506643	-0.775142	0.438256	0.87573
k__Bacteria; p__Saccharibacteria_(TM7); c__TM7_[C-1]; o__TM7_[O-1]; f__TM7_[F-1]; g__TM7_[G-1]; s__sp._oral_taxon_347	1.83771	-0.162743	0.37083	-0.438863	0.660761	0.941573		k__Bacteria; p__Proteobacteria; c__Gammaproteobacteria; o__Pasteurellales; f__Pasteurellaceae; g__Haemophilus; s__parainfluenzae	155.124	0.366848	0.423594	0.866038	0.386469	0.970945		k__Bacteria; p__Proteobacteria; c__Epsilonproteobacteria; o__Campylobacterales; f__Campylobacteraceae; g__Campylobacter; s__gracilis	1.86302	-0.207768	0.37259	-0.557632	0.577095	0.985929		k__Bacteria; p__Firmicutes; c__Bacilli; o__Bacillales; f__Gemellaceae; g__Gemella; s__multispecies_spp51_2	4.46198	-0.630829	0.531781	-1.18626	0.235522	0.87573
k__Bacteria; p__Saccharibacteria_(TM7); c__TM7_[C-1]; o__TM7_[O-1]; f__TM7_[F-1]; g__TM7_[G-1]; s__sp._oral_taxon_352	46.9531	-0.194342	0.418886	-0.46395	0.642683	0.941573		k__Bacteria; p__Firmicutes; c__Bacilli; o__Bacillales; f__Gemellaceae; g__Gemella; s__morbillorum	1.14775	0.0398499	0.410781	0.0970099	0.922718	0.970945		k__Bacteria; p__Bacteroidetes; c__Bacteroidia; o__Bacteroidales; f__Prevotellaceae; g__Prevotella; s__sp._oral_taxon_305	2.88906	0.524427	0.421202	1.24507	0.213105	0.985929		k__Bacteria; p__Firmicutes; c__Negativicutes; o__Selenomonadales; f__Veillonellaceae; g__Veillonella; s__multispecies_spp27_2	5.7087	-0.411421	0.544077	-0.75618	0.449541	0.877046
k__Bacteria; p__Fusobacteria; c__Fusobacteriia; o__Fusobacteriales; f__Leptotrichiaceae; g__Leptotrichia; s__sp._oral_taxon_221	11.097	-0.193996	0.441828	-0.439076	0.660607	0.941573		k__Bacteria; p__Firmicutes; c__Bacilli; o__Bacillales; f__Staphylococcaceae; g__Gemella; s__multispecies_spp14_2	1.11718	-0.0751255	0.417487	-0.179947	0.857194	0.970945		k__Bacteria; p__Actinobacteria; c__Actinobacteria; o__Corynebacteriales; f__Corynebacteriaceae; g__Corynebacterium; s__durum	1.14878	0.125582	0.415218	0.302448	0.762311	0.985929		k__Bacteria; p__Bacteroidetes; c__Bacteroidia; o__Bacteroidales; f__Prevotellaceae; g__Prevotella; s__multispecies_spp5_2	4.63616	-0.374188	0.539147	-0.694038	0.487659	0.881751
k__Bacteria; p__Actinobacteria; c__Actinobacteria; o__Actinomycetales; f__Micrococcaceae; g__Rothia; s__aeria	12.6988	-0.177714	0.422752	-0.420374	0.674212	0.942413		k__Bacteria; p__Firmicutes; c__Bacilli; o__Lactobacillales; f__Streptococcaceae; g__Streptococcus; s__lactarius	4.95289	0.267239	0.405937	0.658326	0.510329	0.970945		k__Bacteria; p__Bacteroidetes; c__Bacteroidia; o__Bacteroidales; f__Prevotellaceae; g__Alloprevotella; s__sp._oral_taxon_308	16.3203	-0.0375495	0.472726	-0.0794319	0.936689	0.985929		k__Bacteria; p__Actinobacteria; c__Actinobacteria; o__Actinomycetales; f__Actinomycetaceae; g__Actinomyces; s__odontolyticus	8.13002	-0.387148	0.539315	-0.717852	0.472848	0.881751
k__Bacteria; p__Firmicutes; c__Clostridia; o__Clostridiales; f__Lachnospiraceae_[XIV]; g__Oribacterium; s__sinus	9.15072	0.168174	0.410414	0.409767	0.681977	0.942413		k__Bacteria; p__Firmicutes; c__Bacilli; o__Lactobacillales; f__Streptococcaceae; g__Streptococcus; s__peroris	1.44798	-0.037262	0.393674	-0.0946521	0.924591	0.970945		k__Bacteria; p__Bacteroidetes; c__Bacteroidia; o__Bacteroidales; f__Porphyromonadaceae; g__Porphyromonas; s__endodontalis	3.46033	-0.0648108	0.418197	-0.154977	0.87684	0.985929		k__Bacteria; p__Proteobacteria; c__Gammaproteobacteria; o__Pasteurellales; f__Pasteurellaceae; g__Aggregatibacter; s__sp._oral_taxon_458	2.99684	-0.373562	0.529889	-0.704982	0.480821	0.881751
k__Bacteria; p__Firmicutes; c__Bacilli; o__Lactobacillales; f__Streptococcaceae; g__Streptococcus; s__cristatus	10.9205	-0.151376	0.378444	-0.399997	0.689159	0.942413		k__Bacteria; p__Proteobacteria; c__Gammaproteobacteria; o__Pasteurellales; f__Pasteurellaceae; g__Haemophilus; s__parahaemolyticus	3.74483	0.554118	0.437058	1.26784	0.204857	0.970945		k__Bacteria; p__Firmicutes; c__Clostridia; o__Clostridiales; f__Lachnospiraceae_[XIV]; g__Butyrivibrio; s__sp._oral_taxon_455	2.95747	0.690996	0.4293	1.60959	0.107488	0.985929		k__Bacteria; p__Bacteroidetes; c__Bacteroidia; o__Bacteroidales; f__Prevotellaceae; g__Prevotella; s__multispecies_spp22_3	1.48382	-0.377116	0.515141	-0.732064	0.46413	0.881751
k__Bacteria; p__Firmicutes; c__Bacilli; o__Lactobacillales; f__Carnobacteriaceae; g__Granulicatella; s__multispecies_spp49_2	11.3784	-0.150419	0.377991	-0.397943	0.690673	0.942413		k__Bacteria; p__Bacteroidetes; c__Bacteroidia; o__Bacteroidales; f__Prevotellaceae; g__Prevotella; s__aurantiaca	4.65068	-0.643278	0.455681	-1.41169	0.158043	0.970945		k__Bacteria; p__Bacteroidetes; c__Bacteroidia; o__Bacteroidales; f__Prevotellaceae; g__Alloprevotella; s__sp._oral_taxon_914	9.94347	0.451058	0.461833	0.97667	0.328733	0.985929		k__Bacteria; p__Firmicutes; c__Bacilli; o__Lactobacillales; f__Streptococcaceae; g__Streptococcus; s__sinensis	1.45363	-0.357711	0.5132	-0.69702	0.48579	0.881751
k__Bacteria; p__Firmicutes; c__Clostridia; o__Clostridiales; f__Peptostreptococcaceae_[XI]; g__Peptostreptococcus; s__stomatis	5.70454	-0.159891	0.423055	-0.377943	0.705473	0.948015		k__Bacteria; p__Bacteroidetes; c__Bacteroidia; o__Bacteroidales; f__Prevotellaceae; g__Prevotella; s__sp._oral_taxon_304	1.97992	-0.657292	0.439312	-1.49618	0.134606	0.970945		k__Bacteria; p__Bacteroidetes; c__Bacteroidia; o__Bacteroidales; f__Porphyromonadaceae; g__Tannerella; s__forsythia	2.25332	0.26787	0.393654	0.68047	0.496207	0.985929		k__Bacteria; p__Bacteroidetes; c__Bacteroidia; o__Bacteroidales; f__Prevotellaceae; g__Prevotella; s__sp._oral_taxon_475	1.48799	-0.372859	0.518749	-0.718765	0.472286	0.881751
k__Bacteria; p__Firmicutes; c__Negativicutes; o__Selenomonadales; f__Veillonellaceae; g__Veillonella; s__atypica	33.3171	0.168413	0.453062	0.371722	0.7101	0.948015		k__Bacteria; p__Proteobacteria; c__Epsilonproteobacteria; o__Campylobacterales; f__Campylobacteraceae; g__Campylobacter; s__gracilis	1.86302	-0.524952	0.398719	-1.3166	0.187973	0.970945		k__Bacteria; p__Fusobacteria; c__Fusobacteriia; o__Fusobacteriales; f__Leptotrichiaceae; g__Leptotrichia; s__sp._oral_taxon_392	2.60616	-0.488308	0.398718	-1.22469	0.220691	0.985929		k__Bacteria; p__Actinobacteria; c__Actinobacteria; o__Actinomycetales; f__Micrococcaceae; g__Rothia; s__mucilaginosa	114.434	0.342301	0.488788	0.700306	0.483736	0.881751
k__Bacteria; p__Fusobacteria; c__Fusobacteriia; o__Fusobacteriales; f__Fusobacteriaceae; g__Fusobacterium; s__periodonticum	45.8443	0.154614	0.422278	0.366144	0.714258	0.948015		k__Bacteria; p__Bacteroidetes; c__Bacteroidia; o__Bacteroidales; f__Prevotellaceae; g__Prevotella; s__sp._oral_taxon_305	2.88906	-0.565988	0.42655	-1.3269	0.184542	0.970945		k__Bacteria; p__Fusobacteria; c__Fusobacteriia; o__Fusobacteriales; f__Leptotrichiaceae; g__Leptotrichia; s__multispecies_spp16_2	1.23757	-0.0387037	0.402911	-0.0960601	0.923473	0.985929		k__Bacteria; p__Bacteroidetes; c__Flavobacteriia; o__Flavobacteriales; f__Flavobacteriaceae; g__Capnocytophaga; s__sp._oral_taxon_332	1.44749	-0.356415	0.514019	-0.693387	0.488067	0.881751
k__Bacteria; p__Bacteroidetes; c__Bacteroidia; o__Bacteroidales; f__Prevotellaceae; g__Prevotella; s__nigrescens	1.93406	-0.107851	0.356849	-0.302231	0.762476	0.962256		k__Bacteria; p__Actinobacteria; c__Actinobacteria; o__Corynebacteriales; f__Corynebacteriaceae; g__Corynebacterium; s__durum	1.14878	0.187455	0.405759	0.461986	0.644091	0.970945		k__Bacteria; p__Proteobacteria; c__Gammaproteobacteria; o__Pasteurellales; f__Pasteurellaceae; g__Haemophilus; s__sp._oral_taxon_036	1.08745	0.0432142	0.417481	0.103512	0.917557	0.985929		k__Bacteria; p__Bacteroidetes; c__Bacteroidia; o__Bacteroidales; f__Prevotellaceae; g__Prevotella; s__sp._oral_taxon_314	4.97918	-0.372358	0.541691	-0.687399	0.491831	0.881751
k__Bacteria; p__Fusobacteria; c__Fusobacteriia; o__Fusobacteriales; f__Leptotrichiaceae; g__Leptotrichia; s__wadei	1.79937	0.105915	0.361501	0.292985	0.769533	0.962256		k__Bacteria; p__Bacteroidetes; c__Bacteroidia; o__Bacteroidales; f__Prevotellaceae; g__Alloprevotella; s__sp._oral_taxon_308	12.7827	-0.389004	0.462738	-0.840657	0.40054	0.970945		k__Bacteria; p__Proteobacteria; c__Gammaproteobacteria; o__Pasteurellales; f__Pasteurellaceae; g__Haemophilus; s__haemolyticus	2.47029	0.311033	0.41668	0.746456	0.455392	0.985929		k__Bacteria; p__Bacteroidetes; c__Bacteroidia; o__Bacteroidales; f__Prevotellaceae; g__Prevotella; s__sp._oral_taxon_313	2.56834	-0.356544	0.524731	-0.679479	0.496834	0.882768
k__Bacteria; p__Firmicutes; c__Negativicutes; o__Selenomonadales; f__Veillonellaceae; g__Veillonella; s__multispecies_spp27_2	4.15975	0.121478	0.39011	0.311394	0.755501	0.962256		k__Bacteria; p__Bacteroidetes; c__Bacteroidia; o__Bacteroidales; f__Porphyromonadaceae; g__Porphyromonas; s__endodontalis	3.46033	-0.122641	0.423899	-0.289315	0.77234	0.970945		k__Bacteria; p__Proteobacteria; c__Gammaproteobacteria; o__Pasteurellales; f__Pasteurellaceae; g__Aggregatibacter; s__aphrophilus	1.65592	0.524805	0.40814	1.28584	0.198497	0.985929		k__Bacteria; p__Fusobacteria; c__Fusobacteriia; o__Fusobacteriales; f__Leptotrichiaceae; g__Leptotrichia; s__sp._oral_taxon_225	2.52924	-0.345948	0.520635	-0.664473	0.506388	0.883957
k__Bacteria; p__Firmicutes; c__Bacilli; o__Lactobacillales; f__Aerococcaceae; g__Abiotrophia; s__defectiva	2.76278	-0.122963	0.384379	-0.319899	0.749045	0.962256		k__Bacteria; p__Firmicutes; c__Clostridia; o__Clostridiales; f__Lachnospiraceae_[XIV]; g__Butyrivibrio; s__sp._oral_taxon_455	2.95747	0.215156	0.424726	0.506577	0.612452	0.970945		k__Bacteria; p__Bacteroidetes; c__Flavobacteriia; o__Flavobacteriales; f__Flavobacteriaceae; g__Capnocytophaga; s__granulosa	6.08586	-0.446693	0.431297	-1.0357	0.300344	0.985929		k__Bacteria; p__Firmicutes; c__Bacilli; o__Lactobacillales; f__Streptococcaceae; g__Streptococcus; s__multispecies_spp40_2	5.86104	0.357986	0.537155	0.666449	0.505124	0.883957
k__Bacteria; p__Firmicutes; c__Bacilli; o__Lactobacillales; f__Streptococcaceae; g__Streptococcus; s__sanguinis	7.36658	-0.111787	0.395987	-0.2823	0.777713	0.962256		k__Bacteria; p__Bacteroidetes; c__Bacteroidia; o__Bacteroidales; f__Prevotellaceae; g__Alloprevotella; s__sp._oral_taxon_914	9.94347	0.390822	0.460124	0.849385	0.395667	0.970945		k__Bacteria; p__Bacteroidetes; c__Flavobacteriia; o__Flavobacteriales; f__Flavobacteriaceae; g__Bergeyella; s__sp._oral_taxon_322	2.62487	0.417237	0.390693	1.06794	0.285547	0.985929		k__Bacteria; p__Fusobacteria; c__Fusobacteria; o__Fusobacteriales; f__Fusobacteriaceae; g__Fusobacterium; s__nucleatum_ss_animalis	1.65898	0.29528	0.470391	0.627732	0.53018	0.884432
k__Bacteria; p__Bacteroidetes; c__Bacteroidia; o__Bacteroidales; f__Bacteroidales_[F-2]; g__Bacteroidales_[G-2]; s__sp._oral_taxon_274	2.22162	-0.11392	0.372955	-0.305452	0.760022	0.962256		k__Bacteria; p__Bacteroidetes; c__Bacteroidia; o__Bacteroidales; f__Porphyromonadaceae; g__Tannerella; s__forsythia	2.25332	-0.546817	0.405489	-1.34854	0.177485	0.970945		k__Bacteria; p__Fusobacteria; c__Fusobacteriia; o__Fusobacteriales; f__Fusobacteriaceae; g__Fusobacterium; s__nucleatum_subsp._animalis	1.08779	-0.106404	0.412783	-0.257771	0.796583	0.985929		k__Bacteria; p__Bacteroidetes; c__Bacteroidia; o__Bacteroidales; f__Prevotellaceae; g__Prevotella; s__sp._Oral_Taxon_299	1.70571	-0.292662	0.50434	-0.580286	0.561722	0.884432
k__Bacteria; p__Proteobacteria; c__Betaproteobacteria; o__Neisseriales; f__Neisseriaceae; g__Neisseria; s__multispecies_spp38_2	15.5192	0.14887	0.447764	0.332475	0.73953	0.962256		k__Bacteria; p__Fusobacteria; c__Fusobacteriia; o__Fusobacteriales; f__Leptotrichiaceae; g__Leptotrichia; s__sp._oral_taxon_392	2.60616	-0.0861014	0.413178	-0.208388	0.834926	0.970945		k__Bacteria; p__Fusobacteria; c__Fusobacteriia; o__Fusobacteriales; f__Fusobacteriaceae; g__Fusobacterium; s__multispecies_spp18_2	1.14819	0.125558	0.415175	0.302422	0.76233	0.985929		k__Bacteria; p__Firmicutes; c__Bacilli; o__Lactobacillales; f__Streptococcaceae; g__Streptococcus; s__multispecies_spp15_2	1.39211	-0.311665	0.513904	-0.606465	0.544206	0.884432
k__Bacteria; p__Actinobacteria; c__Actinobacteria; o__Actinomycetales; f__Micrococcaceae; g__Rothia; s__dentocariosa	14.2089	0.125828	0.436256	0.288426	0.77302	0.962256		k__Bacteria; p__Fusobacteria; c__Fusobacteriia; o__Fusobacteriales; f__Leptotrichiaceae; g__Leptotrichia; s__multispecies_spp16_2	1.23757	0.208051	0.397857	0.522928	0.601024	0.970945		k__Bacteria; p__Firmicutes; c__Clostridia; o__Clostridiales; f__Peptoniphilaceae; g__Parvimonas; s__multispecies_spp19_2	1.56639	-0.432471	0.376861	-1.14756	0.25115	0.985929		k__Bacteria; p__Proteobacteria; c__Betaproteobacteria; o__Burkholderiales; f__Comamonadaceae; g__Ottowia; s__sp._oral_taxon_894	2.61069	0.301593	0.512399	0.588589	0.556137	0.884432
k__Bacteria; p__Proteobacteria; c__Gammaproteobacteria; o__Cardiobacteriales; f__Cardiobacteriaceae; g__Cardiobacterium; s__valvarum	2.06019	0.0279941	0.383468	0.0730023	0.941804	0.96375		k__Bacteria; p__Proteobacteria; c__Gammaproteobacteria; o__Pasteurellales; f__Pasteurellaceae; g__Haemophilus; s__sp._oral_taxon_036	1.08745	-0.0355772	0.4187	-0.0849706	0.932285	0.970945		k__Bacteria; p__Firmicutes; c__Negativicutes; o__Selenomonadales; f__Veillonellaceae; g__Selenomonas; s__sp._oral_taxon_478	2.26711	0.507204	0.427288	1.18703	0.235216	0.985929		k__Bacteria; p__Fusobacteria; c__Fusobacteriia; o__Fusobacteriales; f__Leptotrichiaceae; g__Leptotrichia; s__sp._oral_taxon_212	3.14791	-0.32203	0.514344	-0.626099	0.53125	0.884432
k__Bacteria; p__Firmicutes; c__Negativicutes; o__Selenomonadales; f__Veillonellaceae; g__Selenomonas; s__multispecies_spp3_2	2.54034	-0.0537512	0.383671	-0.140097	0.888583	0.96375		k__Bacteria; p__Proteobacteria; c__Gammaproteobacteria; o__Pasteurellales; f__Pasteurellaceae; g__Haemophilus; s__haemolyticus	2.47029	0.130861	0.414462	0.315738	0.752201	0.970945		k__Bacteria; p__Bacteroidetes; c__Bacteroidia; o__Bacteroidales; f__Prevotellaceae; g__Prevotella; s__multispecies_spp20_2	1.23843	0.239349	0.412476	0.580275	0.561729	0.985929		k__Bacteria; p__Saccharibacteria_(TM7); c__TM7_[C-1]; o__TM7_[O-1]; f__TM7_[F-1]; g__TM7_[G-1]; s__sp._oral_taxon_952	1.68434	-0.293157	0.501721	-0.584303	0.559016	0.884432
k__Bacteria; p__Actinobacteria; c__Actinobacteria; o__Actinomycetales; f__Actinomycetaceae; g__Actinomyces; s__multispecies_spp6_2	1.90302	-0.0744963	0.356886	-0.20874	0.834651	0.96375		k__Bacteria; p__Proteobacteria; c__Gammaproteobacteria; o__Pasteurellales; f__Pasteurellaceae; g__Aggregatibacter; s__aphrophilus	1.65592	0.500499	0.376663	1.32877	0.183924	0.970945		k__Bacteria; p__Bacteroidetes; c__Bacteroidia; o__Bacteroidales; f__Prevotellaceae; g__Prevotella; s__multispecies_spp21_4	1.08803	0.0432434	0.417487	0.10358	0.917502	0.985929		k__Bacteria; p__Fusobacteria; c__Fusobacteriia; o__Fusobacteriales; f__Fusobacteriaceae; g__Fusobacterium; s__simiae	1.38543	-0.311449	0.513839	-0.606122	0.544434	0.884432
k__Bacteria; p__Fusobacteria; c__Fusobacteriia; o__Fusobacteriales; f__Leptotrichiaceae; g__Leptotrichia; s__hofstadii	3.287	0.0685065	0.398947	0.171719	0.863659	0.96375		k__Bacteria; p__Bacteroidetes; c__Flavobacteriia; o__Flavobacteriales; f__Flavobacteriaceae; g__Capnocytophaga; s__granulosa	6.08586	-0.47001	0.437801	-1.07357	0.283016	0.970945		k__Bacteria; p__Bacteroidetes; c__Bacteroidia; o__Bacteroidales; f__Prevotellaceae; g__Prevotella; s__multispecies_spp22_3	1.48382	0.493773	0.412286	1.19765	0.231054	0.985929		k__Bacteria; p__Bacteroidetes; c__Bacteroidia; o__Bacteroidales; f__Prevotellaceae; g__Prevotella; s__baroniae	1.44253	0.294019	0.477508	0.615735	0.538069	0.884432
k__Bacteria; p__Proteobacteria; c__Gammaproteobacteria; o__Pasteurellales; f__Pasteurellaceae; g__Aggregatibacter; s__sp._oral_taxon_458	2.99684	-0.0403338	0.393288	-0.102555	0.918316	0.96375		k__Bacteria; p__Bacteroidetes; c__Bacteroidia; o__Bacteroidales; f__Prevotellaceae; g__Prevotella; s__melaninogenica	119.237	-0.285695	0.454055	-0.629208	0.529213	0.970945		k__Bacteria; p__Bacteroidetes; c__Bacteroidia; o__Bacteroidales; f__Porphyromonadaceae; g__Porphyromonas; s__sp._oral_taxon_278	2.07342	0.605262	0.409778	1.47705	0.139663	0.985929		k__Bacteria; p__Proteobacteria; c__Epsilonproteobacteria; o__Campylobacterales; f__Campylobacteraceae; g__Campylobacter; s__sp._oral_taxon_044	1.38842	-0.311074	0.514317	-0.60483	0.545292	0.884432
k__Bacteria; p__Fusobacteria; c__Fusobacteriia; o__Fusobacteriales; f__Fusobacteriaceae; g__Fusobacterium; s__sp._oral_taxon_203	2.96418	-0.0624296	0.405076	-0.154118	0.877517	0.96375		k__Bacteria; p__Bacteroidetes; c__Flavobacteriia; o__Flavobacteriales; f__Flavobacteriaceae; g__Bergeyella; s__sp._oral_taxon_322	2.62487	0.186432	0.385304	0.483857	0.628487	0.970945		k__Bacteria; p__Fusobacteria; c__Fusobacteriia; o__Fusobacteriales; f__Leptotrichiaceae; g__Leptotrichia; s__wadei	1.79937	-0.262023	0.382674	-0.684715	0.493524	0.985929		k__Bacteria; p__Firmicutes; c__Clostridia; o__Clostridiales; f__Lachnospiraceae_[XIVa]; g__Lachnospiraceae_[G]; s__sp._Oral_Taxon_B32	1.38649	-0.301311	0.52287	-0.576265	0.564436	0.884432
k__Bacteria; p__Firmicutes; c__Clostridia; o__Clostridiales; f__Lachnospiraceae_[XIV]; g__Stomatobaculum; s__sp._oral_taxon_097	5.48301	0.0808067	0.409544	0.197309	0.843586	0.96375		k__Bacteria; p__Fusobacteria; c__Fusobacteriia; o__Fusobacteriales; f__Fusobacteriaceae; g__Fusobacterium; s__nucleatum_subsp._animalis	1.08779	-0.0355827	0.418702	-0.0849834	0.932275	0.970945		k__Bacteria; p__Firmicutes; c__Clostridia; o__Clostridiales; f__Lachnospiraceae_[XIV]; g__Oribacterium; s__parvum	4.10138	0.670335	0.426272	1.57255	0.115823	0.985929		k__Bacteria; p__Firmicutes; c__Bacilli; o__Lactobacillales; f__Streptococcaceae; g__Streptococcus; s__multispecies_spp41_3	4.41248	0.308365	0.515956	0.597657	0.550069	0.884432
k__Bacteria; p__Proteobacteria; c__Gammaproteobacteria; o__Pasteurellales; f__Pasteurellaceae; g__Haemophilus; s__parainfluenzae	155.124	0.10155	0.395559	0.256726	0.79739	0.96375		k__Bacteria; p__Fusobacteria; c__Fusobacteriia; o__Fusobacteriales; f__Fusobacteriaceae; g__Fusobacterium; s__multispecies_spp18_2	1.14819	-0.113463	0.416369	-0.272505	0.785234	0.970945		k__Bacteria; p__Bacteroidetes; c__Bacteroidia; o__Bacteroidales; f__Prevotellaceae; g__Prevotella; s__sp._oral_taxon_309	2.8718	0.58233	0.422717	1.37759	0.168331	0.985929		k__Bacteria; p__Firmicutes; c__Clostridia; o__Clostridiales; f__Peptostreptococcaceae_[XI]; g__Peptostreptococcaceae_[XI][G-5]; s__sp._oral_taxon_493	1.72155	-0.31163	0.503434	-0.619008	0.535911	0.884432
k__Bacteria; p__Proteobacteria; c__Epsilonproteobacteria; o__Campylobacterales; f__Campylobacteraceae; g__Campylobacter; s__gracilis	1.86302	-0.0421169	0.351989	-0.119654	0.904757	0.96375		k__Bacteria; p__Firmicutes; c__Clostridia; o__Clostridiales; f__Peptoniphilaceae; g__Parvimonas; s__multispecies_spp19_2	1.56639	0.0779811	0.385611	0.202227	0.839739	0.970945		k__Bacteria; p__Spirochaetes; c__Spirochaetia; o__Spirochaetales; f__Spirochaetaceae; g__Treponema; s__socranskii	1.29497	0.0367833	0.401572	0.0915984	0.927017	0.985929		k__Bacteria; p__Actinobacteria; c__Coriobacteriia; o__Coriobacteriales; f__Coriobacteriaceae; g__Atopobium; s__parvulum	13.3181	-0.356354	0.551276	-0.646416	0.51801	0.884432
k__Bacteria; p__Bacteroidetes; c__Bacteroidia; o__Bacteroidales; f__Porphyromonadaceae; g__Porphyromonas; s__endodontalis	3.46033	0.0208209	0.392464	0.0530516	0.957691	0.96375		k__Bacteria; p__Bacteroidetes; c__Bacteroidia; o__Bacteroidales; f__Prevotellaceae; g__Prevotella; s__multispecies_spp20_2	1.23843	-0.221588	0.413533	-0.535842	0.592068	0.970945		k__Bacteria; p__Proteobacteria; c__Gammaproteobacteria; o__Pasteurellales; f__Pasteurellaceae; g__Aggregatibacter; s__paraphrophilus	1.20645	-0.342211	0.396453	-0.863181	0.388038	0.985929		k__Bacteria; p__Proteobacteria; c__Betaproteobacteria; o__Neisseriales; f__Neisseriaceae; g__Neisseria; s__subflava	270.327	-0.303709	0.556468	-0.545779	0.585218	0.90983
k__Bacteria; p__Bacteroidetes; c__Bacteroidia; o__Bacteroidales; f__Prevotellaceae; g__Prevotella; s__shahii	3.44429	-0.0328795	0.386519	-0.0850656	0.932209	0.96375		k__Bacteria; p__Bacteroidetes; c__Bacteroidia; o__Bacteroidales; f__Prevotellaceae; g__Prevotella; s__multispecies_spp21_4	1.08803	-0.0355866	0.418703	-0.0849925	0.932267	0.970945		k__Bacteria; p__Bacteroidetes; c__Bacteroidia; o__Bacteroidales; f__Prevotellaceae; g__Prevotella; s__veroralis	3.51058	0.0236926	0.423204	0.055984	0.955355	0.985929		k__Bacteria; p__Firmicutes; c__Clostridia; o__Clostridiales; f__Ruminococcaceae; g__Ruminococcaceae_[G-1]; s__sp._oral_taxon_075	3.7282	0.263955	0.516568	0.510978	0.609366	0.94003
k__Bacteria; p__Firmicutes; c__Negativicutes; o__Selenomonadales; f__Veillonellaceae; g__Veillonella; s__parvula	43.237	0.0175394	0.36984	0.0474243	0.962175	0.96375		k__Bacteria; p__Bacteroidetes; c__Bacteroidia; o__Bacteroidales; f__Prevotellaceae; g__Prevotella; s__pallens	18.449	-0.409239	0.467869	-0.874687	0.381744	0.970945		k__Bacteria; p__Actinobacteria; c__Actinobacteria; o__Actinomycetales; f__Actinomycetaceae; g__Actinomyces; s__johnsonii	1.11718	-0.0628232	0.411494	-0.152671	0.878658	0.985929		k__Bacteria; p__Bacteroidetes; c__Bacteroidia; o__Bacteroidales; f__Prevotellaceae; g__Prevotella; s__intermedia	4.82668	0.267964	0.541132	0.495192	0.620465	0.945599
k__Bacteria; p__Firmicutes; c__Negativicutes; o__Selenomonadales; f__Veillonellaceae; g__Veillonella; s__multispecies_spp29_2	37.2557	0.0636973	0.451922	0.140947	0.887911	0.96375		k__Bacteria; p__Bacteroidetes; c__Bacteroidia; o__Bacteroidales; f__Porphyromonadaceae; g__Porphyromonas; s__sp._oral_taxon_278	2.07342	-0.0608893	0.400459	-0.152049	0.879149	0.970945		k__Bacteria; p__Bacteroidetes; c__Bacteroidia; o__Bacteroidales; f__Prevotellaceae; g__Prevotella; s__intermedia	4.82668	-0.110744	0.444993	-0.248866	0.803464	0.985929		k__Bacteria; p__Bacteroidetes; c__Bacteroidia; o__Bacteroidales; f__Porphyromonadaceae; g__Porphyromonas; s__pasteri	68.0815	0.267961	0.54426	0.492339	0.622479	0.945599
k__Bacteria; p__Fusobacteria; c__Fusobacteriia; o__Fusobacteriales; f__Leptotrichiaceae; g__Leptotrichia; s__sp._oral_taxon_225	2.52924	-0.048384	0.379958	-0.127341	0.898671	0.96375		k__Bacteria; p__Bacteroidetes; c__Bacteroidia; o__Bacteroidales; f__Prevotellaceae; g__Prevotella; s__sp._oral_taxon_309	2.20475	-0.420548	0.399382	-1.053	0.292342	0.970945		k__Bacteria; p__Firmicutes; c__Clostridia; o__Clostridiales; f__Lachnospiraceae_[XIV]; g__Lachnoanaerobaculum; s__orale	6.69491	-0.488628	0.452249	-1.08044	0.279947	0.985929		k__Bacteria; p__Bacteroidetes; c__Bacteroidia; o__Bacteroidales; f__Prevotellaceae; g__Prevotella; s__denticola	1.38634	0.148141	0.488488	0.303265	0.761688	0.946169
k__Bacteria; p__Firmicutes; c__Bacilli; o__Lactobacillales; f__Streptococcaceae; g__Streptococcus; s__multispecies_spp32_2	5.77471	0.0574291	0.373525	0.153749	0.877808	0.96375		k__Bacteria; p__Spirochaetes; c__Spirochaetia; o__Spirochaetales; f__Spirochaetaceae; g__Treponema; s__socranskii	1.29497	-0.142391	0.406285	-0.350471	0.725986	0.970945		k__Bacteria; p__Firmicutes; c__Clostridia; o__Clostridiales; f__Lachnospiraceae_[XIV]; g__Lachnospiraceae_[G-3]; s__sp._oral_taxon_100	1.62756	-0.0604216	0.384037	-0.157333	0.874983	0.985929		k__Bacteria; p__Saccharibacteria_(TM7); c__TM7_[C-1]; o__TM7_[O-1]; f__TM7_[F-1]; g__TM7_[G-2]; s__sp._oral_taxon_350	1.43986	-0.118772	0.502192	-0.236507	0.813039	0.946169
k__Bacteria; p__SR1; c__SR1_[C-1]; o__SR1_[O-1]; f__SR1_[F-1]; g__SR1_[G-1]; s__sp._oral_taxon_345	1.9665	0.0176879	0.356073	0.0496749	0.960381	0.96375		k__Bacteria; p__Proteobacteria; c__Gammaproteobacteria; o__Pasteurellales; f__Pasteurellaceae; g__Aggregatibacter; s__paraphrophilus	1.20645	-0.186589	0.414371	-0.450293	0.652499	0.970945		k__Bacteria; p__Proteobacteria; c__Gammaproteobacteria; o__Pasteurellales; f__Pasteurellaceae; g__Haemophilus; s__sp._Oral_Taxon_C82	1.89063	0.0917196	0.388831	0.235885	0.813522	0.985929		k__Bacteria; p__Proteobacteria; c__Gammaproteobacteria; o__Cardiobacteriales; f__Cardiobacteriaceae; g__Cardiobacterium; s__valvarum	2.06019	0.142893	0.509271	0.280584	0.77903	0.946169
k__Bacteria; p__Proteobacteria; c__Gammaproteobacteria; o__Cardiobacteriales; f__Cardiobacteriaceae; g__Cardiobacterium; s__hominis	2.45193	-0.0658089	0.366254	-0.179681	0.857403	0.96375		k__Bacteria; p__Bacteroidetes; c__Bacteroidia; o__Bacteroidales; f__Prevotellaceae; g__Prevotella; s__veroralis	3.51058	-0.471992	0.429966	-1.09774	0.272317	0.970945		k__Bacteria; p__Fusobacteria; c__Fusobacteriia; o__Fusobacteriales; f__Leptotrichiaceae; g__Leptotrichia; s__sp._oral_taxon_219	1.56393	-0.0162176	0.385955	-0.0420195	0.966483	0.985929		k__Bacteria; p__Bacteroidetes; c__Flavobacteriia; o__Flavobacteriales; f__Flavobacteriaceae; g__Capnocytophaga; s__sp._oral_taxon_902	1.50391	-0.156155	0.520787	-0.299844	0.764296	0.946169
k__Bacteria; p__Bacteroidetes; c__Bacteroidia; o__Bacteroidales; f__Prevotellaceae; g__Prevotella; s__salivae	23.926	0.0204616	0.450214	0.0454486	0.96375	0.96375		k__Bacteria; p__Actinobacteria; c__Actinobacteria; o__Actinomycetales; f__Actinomycetaceae; g__Actinomyces; s__johnsonii	1.11718	-0.0751255	0.417487	-0.179947	0.857194	0.970945		k__Bacteria; p__Firmicutes; c__Clostridia; o__Clostridiales; f__Lachnospiraceae_[XIV]; g__Lachnoanaerobaculum; s__umeaense	6.25822	-0.148438	0.426112	-0.348353	0.727575	0.985929		k__Bacteria; p__Fusobacteria; c__Fusobacteriia; o__Fusobacteriales; f__Leptotrichiaceae; g__Leptotrichia; s__shahii	1.62774	0.143112	0.477862	0.299485	0.76457	0.946169
k__Bacteria; p__Firmicutes; c__Bacilli; o__Lactobacillales; f__Streptococcaceae; g__Streptococcus; s__multispecies_spp40_2	5.86104	-0.0631195	0.414241	-0.152374	0.878892	0.96375		k__Bacteria; p__Firmicutes; c__Clostridia; o__Clostridiales; f__Lachnospiraceae_[XIV]; g__Lachnoanaerobaculum; s__orale	5.20542	-0.573846	0.443203	-1.29477	0.1954	0.970945		k__Bacteria; p__Bacteroidetes; c__Bacteroidia; o__Bacteroidales; f__Prevotellaceae; g__Prevotella; s__shahii	3.44429	0.229833	0.414789	0.554095	0.579514	0.985929		k__Bacteria; p__Fusobacteria; c__Fusobacteriia; o__Fusobacteriales; f__Leptotrichiaceae; g__Leptotrichia; s__sp._oral_taxon_215	7.49667	0.141508	0.548851	0.257826	0.796541	0.946169
k__Bacteria; p__Proteobacteria; c__Betaproteobacteria; o__Neisseriales; f__Neisseriaceae; g__Neisseria; s__multispecies_spp42_4	11.5046	-0.110265	0.42881	-0.257142	0.797069	0.96375		k__Bacteria; p__Firmicutes; c__Clostridia; o__Clostridiales; f__Lachnospiraceae_[XIV]; g__Lachnospiraceae_[G-3]; s__sp._oral_taxon_100	1.62756	-0.0948622	0.389528	-0.243531	0.807594	0.970945		k__Bacteria; p__Firmicutes; c__Bacilli; o__Lactobacillales; f__Streptococcaceae; g__Streptococcus; s__multispecies_spp23_15	1.2414	0.0978891	0.407516	0.240209	0.810168	0.985929		k__Bacteria; p__Firmicutes; c__Clostridia; o__Clostridiales; f__Lachnospiraceae_[XIV]; g__Stomatobaculum; s__sp._oral_taxon_097	5.48301	0.185499	0.53516	0.346623	0.728875	0.946169
k__Bacteria; p__Actinobacteria; c__Actinobacteria; o__Actinomycetales; f__Actinomycetaceae; g__Actinomyces; s__graevenitzii	5.5285	-0.097836	0.424833	-0.230293	0.817864	0.96375		k__Bacteria; p__Proteobacteria; c__Gammaproteobacteria; o__Pasteurellales; f__Pasteurellaceae; g__Haemophilus; s__sp._Oral_Taxon_C82	1.89063	-0.317	0.397571	-0.797342	0.425252	0.970945		k__Bacteria; p__Firmicutes; c__Bacilli; o__Lactobacillales; f__Streptococcaceae; g__Streptococcus; s__multispecies_spp24_14	66.7919	0.117844	0.379022	0.310916	0.755865	0.985929		k__Bacteria; p__Firmicutes; c__Bacilli; o__Lactobacillales; f__Carnobacteriaceae; g__Granulicatella; s__elegans	2.37637	-0.138557	0.520931	-0.26598	0.790255	0.946169
k__Bacteria; p__Proteobacteria; c__Betaproteobacteria; o__Neisseriales; f__Neisseriaceae; g__Neisseria; s__pharyngis	3.78426	-0.0666114	0.400849	-0.166176	0.868019	0.96375		k__Bacteria; p__Fusobacteria; c__Fusobacteriia; o__Fusobacteriales; f__Leptotrichiaceae; g__Leptotrichia; s__sp._oral_taxon_219	1.56393	-0.281949	0.397658	-0.709025	0.478309	0.970945		k__Bacteria; p__Bacteroidetes; c__Bacteroidia; o__Bacteroidales; f__Porphyromonadaceae; g__Porphyromonas; s__pasteri	68.0815	0.432077	0.447315	0.965934	0.334077	0.985929		k__Bacteria; p__Firmicutes; c__Clostridia; o__Clostridiales; f__Lachnospiraceae_[XIV]; g__Catonella; s__morbi	3.07963	-0.176509	0.517723	-0.340932	0.733155	0.946169
k__Bacteria; p__Firmicutes; c__Bacilli; o__Lactobacillales; f__Streptococcaceae; g__Streptococcus; s__intermedius	2.35825	-0.0202427	0.357985	-0.0565462	0.954907	0.96375		k__Bacteria; p__Bacteroidetes; c__Bacteroidia; o__Bacteroidales; f__Porphyromonadaceae; g__Tannerella; s__sp._oral_taxon_286	2.20114	0.341731	0.378088	0.90384	0.36608	0.970945		k__Bacteria; p__Bacteroidetes; c__Flavobacteriia; o__Flavobacteriales; f__Flavobacteriaceae; g__Capnocytophaga; s__ochracea	1.18061	0.0200945	0.409391	0.049084	0.960852	0.985929		k__Bacteria; p__Firmicutes; c__Bacilli; o__Lactobacillales; f__Streptococcaceae; g__Streptococcus; s__peroris	1.44798	-0.120258	0.50043	-0.240309	0.810091	0.946169
k__Bacteria; p__Fusobacteria; c__Fusobacteriia; o__Fusobacteriales; f__Fusobacteriaceae; g__Fusobacterium; s__nucleatum	2.33889	-0.0287414	0.353149	-0.0813861	0.935135	0.96375		k__Bacteria; p__Firmicutes; c__Bacilli; o__Lactobacillales; f__Streptococcaceae; g__Streptococcus; s__multispecies_spp23_15	1.2414	-0.221671	0.413567	-0.535998	0.59196	0.970945		k__Bacteria; p__Saccharibacteria_(TM7); c__TM7_[C-1]; o__TM7_[O-1]; f__TM7_[F-1]; g__TM7_[G-1]; s__sp._oral_taxon_348	1.68312	-0.483449	0.371919	-1.29988	0.193642	0.985929		k__Bacteria; p__Proteobacteria; c__Epsilonproteobacteria; o__Campylobacterales; f__Campylobacteraceae; g__Campylobacter; s__gracilis	1.86302	0.140229	0.474226	0.295701	0.767458	0.946169
k__Bacteria; p__Firmicutes; c__Clostridia; o__Clostridiales; f__Ruminococcaceae; g__Ruminococcaceae_[G-1]; s__sp._oral_taxon_075	3.7282	0.0235876	0.388402	0.0607299	0.951574	0.96375		k__Bacteria; p__Firmicutes; c__Bacilli; o__Lactobacillales; f__Streptococcaceae; g__Streptococcus; s__multispecies_spp24_14	66.7919	-0.25311	0.383814	-0.659462	0.509599	0.970945		k__Bacteria; p__Bacteroidetes; c__Bacteroidia; o__Bacteroidales; f__Porphyromonadaceae; g__Porphyromonas; s__catoniae	1.77333	0.0826211	0.397324	0.207944	0.835273	0.985929		k__Bacteria; p__Bacteroidetes; c__Bacteroidia; o__Bacteroidales; f__Porphyromonadaceae; g__Porphyromonas; s__endodontalis	3.46033	0.220499	0.520727	0.423446	0.67197	0.946169
k__Bacteria; p__Actinobacteria; c__Coriobacteriia; o__Coriobacteriales; f__Coriobacteriaceae; g__Atopobium; s__parvulum	13.3181	0.0607326	0.435362	0.139499	0.889056	0.96375		k__Bacteria; p__Proteobacteria; c__Betaproteobacteria; o__Burkholderiales; f__Comamonadaceae; g__Ottowia; s__sp._oral_taxon_894	2.61069	-0.526279	0.424854	-1.23873	0.215446	0.970945		k__Bacteria; p__Bacteroidetes; c__Bacteroidia; o__Bacteroidales; f__Porphyromonadaceae; g__Porphyromonas; s__multispecies_spp25_2	1.11718	0.0850414	0.416277	0.20429	0.838127	0.985929		k__Bacteria; p__Firmicutes; c__Clostridia; o__Clostridiales; f__Lachnospiraceae_[XIV]; g__Butyrivibrio; s__sp._oral_taxon_455	2.95747	-0.135295	0.529318	-0.255603	0.798257	0.946169
k__Bacteria; p__Bacteroidetes; c__Bacteroidia; o__Bacteroidales; f__Prevotellaceae; g__Prevotella; s__sp._oral_taxon_306	23.4615	-0.0919994	0.462488	-0.198923	0.842323	0.96375		k__Bacteria; p__Saccharibacteria_(TM7); c__TM7_[C-1]; o__TM7_[O-1]; f__TM7_[F-1]; g__TM7_[G-1]; s__sp._oral_taxon_348	1.68312	-0.510555	0.403782	-1.26443	0.206075	0.970945		k__Bacteria; p__Fusobacteria; c__Fusobacteriia; o__Fusobacteriales; f__Leptotrichiaceae; g__Leptotrichia; s__hongkongensis	2.4023	0.283118	0.400331	0.70721	0.479436	0.985929		k__Bacteria; p__Firmicutes; c__Clostridia; o__Clostridiales; f__Ruminococcaceae; g__Ruminococcaceae_[G-2]; s__sp._oral_taxon_085	3.82759	-0.126869	0.530008	-0.239372	0.810817	0.946169
k__Bacteria; p__Bacteroidetes; c__Bacteroidia; o__Bacteroidales; f__Prevotellaceae; g__Prevotella; s__oulorum	2.21841	0.0855822	0.358914	0.238448	0.811534	0.96375		k__Bacteria; p__Bacteroidetes; c__Bacteroidia; o__Bacteroidales; f__Porphyromonadaceae; g__Porphyromonas; s__catoniae	1.77333	0.550087	0.380678	1.44502	0.148452	0.970945		k__Bacteria; p__Firmicutes; c__Mollicutes; o__Mycoplasmatales; f__Mycoplasmataceae; g__Mycoplasma; s__orale	1.08803	-0.106434	0.412784	-0.257844	0.796527	0.985929		k__Bacteria; p__Bacteroidetes; c__Bacteroidia; o__Bacteroidales; f__Porphyromonadaceae; g__Porphyromonas; s__sp._oral_taxon_278	2.07342	0.14569	0.495152	0.294234	0.768579	0.946169
k__Bacteria; p__Fusobacteria; c__Fusobacteriia; o__Fusobacteriales; f__Leptotrichiaceae; g__Leptotrichia; s__multispecies_sppn1_2_nov_97.99%	1.23869	0.0534672	0.37712	0.141777	0.887256	NA		k__Bacteria; p__Bacteroidetes; c__Bacteroidia; o__Bacteroidales; f__Porphyromonadaceae; g__Porphyromonas; s__multispecies_spp25_2	1.11718	-0.0751255	0.417487	-0.179947	0.857194	0.970945		k__Bacteria; p__Proteobacteria; c__Betaproteobacteria; o__Neisseriales; f__Neisseriaceae; g__Neisseria; s__sp._oral_taxon_018	1.69443	0.631786	0.439192	1.43852	0.150287	0.985929		k__Bacteria; p__Fusobacteria; c__Fusobacteriia; o__Fusobacteriales; f__Leptotrichiaceae; g__Leptotrichia; s__wadei	1.79937	-0.166775	0.498528	-0.334536	0.737975	0.946169
k__Bacteria; p__Bacteroidetes; c__Flavobacteriia; o__Flavobacteriales; f__Flavobacteriaceae; g__Bergeyella; s__sp._oral_taxon_907_nov_97.42%	1.17721	-0.204543	0.385153	-0.53107	0.59537	NA		k__Bacteria; p__Firmicutes; c__Mollicutes; o__Mycoplasmatales; f__Mycoplasmataceae; g__Mycoplasma; s__orale	1.08803	-0.0355866	0.418703	-0.0849925	0.932267	0.970945		k__Bacteria; p__Firmicutes; c__Bacilli; o__Lactobacillales; f__Streptococcaceae; g__Streptococcus; s__sinensis	1.45363	-0.0343603	0.390193	-0.0880597	0.929829	0.985929		k__Bacteria; p__Proteobacteria; c__Gammaproteobacteria; o__Pasteurellales; f__Pasteurellaceae; g__Haemophilus; s__sp._Oral_Taxon_C82	1.89063	-0.22137	0.499274	-0.443383	0.657489	0.946169
k__Bacteria; p__Proteobacteria; c__Betaproteobacteria; o__Neisseriales; f__Neisseriaceae; g__Neisseria; s__sp._oral_taxon_018_nov_97.67%	1.17721	0.276842	0.380399	0.727768	0.466756	NA		k__Bacteria; p__Proteobacteria; c__Betaproteobacteria; o__Neisseriales; f__Neisseriaceae; g__Neisseria; s__sp._oral_taxon_018	1.17647	0.287867	0.400059	0.71956	0.471796	0.970945		k__Bacteria; p__Firmicutes; c__Negativicutes; o__Selenomonadales; f__Veillonellaceae; g__Veillonella; s__parvula	43.237	0.102629	0.395819	0.259283	0.795417	0.985929		k__Bacteria; p__Fusobacteria; c__Fusobacteriia; o__Fusobacteriales; f__Leptotrichiaceae; g__Leptotrichia; s__sp._oral_taxon_219	1.56393	0.191299	0.477601	0.400541	0.688758	0.946169
k__Bacteria; p__Bacteroidetes; c__Flavobacteriia; o__Flavobacteriales; f__Flavobacteriaceae; g__Capnocytophaga; s__multispecies_sppn1_2_nov_96.35%	1.17962	0.0385952	0.381859	0.101072	0.919494	NA		k__Bacteria; p__Firmicutes; c__Bacilli; o__Lactobacillales; f__Streptococcaceae; g__Streptococcus; s__sinensis	1.45363	0.206813	0.384972	0.537214	0.59112	0.970945		k__Bacteria; p__Synergistetes; c__Synergistia; o__Synergistales; f__Synergistaceae; g__Fretibacterium; s__sp._oral_taxon_362	1.11752	-0.0627556	0.411499	-0.152505	0.878789	0.985929		k__Bacteria; p__Firmicutes; c__Bacilli; o__Lactobacillales; f__Streptococcaceae; g__Streptococcus; s__multispecies_spp24_14	66.7919	0.229664	0.486588	0.471988	0.636935	0.946169
k__Bacteria; p__Firmicutes; c__Clostridia; o__Clostridiales; f__multifamily; g__multigenus; s__multispecies_sppn1_2_nov_96.21%	1.11841	0.0219612	0.386844	0.0567701	0.954728	NA		k__Bacteria; p__Proteobacteria; c__Gammaproteobacteria; o__Pseudomonadales; f__Moraxellaceae; g__Moraxella; s__sp._Oral_Taxon_B07	1.0581	0.163798	0.414654	0.395023	0.692826	0.970945		k__Bacteria; p__Synergistetes; c__Synergistia; o__Synergistales; f__Synergistaceae; g__Fretibacterium; s__multispecies_spp26_2	1.11895	-0.206013	0.407313	-0.505785	0.613007	0.985929		k__Bacteria; p__Firmicutes; c__Negativicutes; o__Selenomonadales; f__Veillonellaceae; g__Veillonella; s__parvula	43.237	-0.179236	0.503144	-0.356231	0.721667	0.946169
k__Bacteria; p__Firmicutes; c__Negativicutes; o__Selenomonadales; f__Sporomusaceae; g__multigenus; s__multispecies_sppn1_2_nov_87.50%	1.11905	0.147194	0.385763	0.381566	0.702783	NA		k__Bacteria; p__Synergistetes; c__Synergistia; o__Synergistales; f__Synergistaceae; g__Fretibacterium; s__sp._oral_taxon_362	1.11752	-0.0751318	0.41749	-0.179961	0.857183	0.970945		k__Bacteria; p__Firmicutes; c__Clostridia; o__Clostridiales; f__Peptoniphilaceae; g__Parvimonas; s__micra	2.60759	-0.140103	0.395608	-0.354147	0.723229	0.985929		k__Bacteria; p__Saccharibacteria_(TM7); c__TM7_[C-1]; o__TM7_[O-1]; f__TM7_[F-1]; g__TM7_[G-3]; s__sp._oral_taxon_351	5.62209	0.127865	0.500683	0.255381	0.798429	0.946169
k__Bacteria; p__Bacteroidetes; c__Bacteroidia; o__Bacteroidales; f__Prevotellaceae; g__Prevotella; s__denticola	1.38634	-0.283758	0.372759	-0.761237	0.446516	NA		k__Bacteria; p__Synergistetes; c__Synergistia; o__Synergistales; f__Synergistaceae; g__Fretibacterium; s__multispecies_spp26_2	1.11895	-0.0751563	0.417504	-0.180013	0.857142	0.970945		k__Bacteria; p__Proteobacteria; c__Gammaproteobacteria; o__Pasteurellales; f__Pasteurellaceae; g__Haemophilus; s__pittmaniae	1.56511	-0.0162457	0.393397	-0.041296	0.96706	0.985929		k__Bacteria; p__Firmicutes; c__Bacilli; o__Lactobacillales; f__Streptococcaceae; g__Streptococcus; s__sp._oral_taxon_056	2.0459	0.17218	0.47385	0.363364	0.716333	0.946169
k__Bacteria; p__Saccharibacteria_(TM7); c__TM7_[C-1]; o__TM7_[O-1]; f__TM7_[F-1]; g__TM7_[G-2]; s__sp._oral_taxon_350	1.43986	0.538078	0.367248	1.46516	0.142876	NA		k__Bacteria; p__Bacteroidetes; c__Bacteroidia; o__Bacteroidales; f__Porphyromonadaceae; g__Porphyromonas; s__gingivalis	3.18284	0.0974604	0.432167	0.225516	0.821578	0.970945		k__Bacteria; p__Saccharibacteria_(TM7); c__TM7_[C-1]; o__TM7_[O-1]; f__TM7_[F-1]; g__TM7_[G-1]; s__sp._oral_taxon_349	2.15169	0.459703	0.411854	1.11618	0.264346	0.985929		k__Bacteria; p__Firmicutes; c__Bacilli; o__Lactobacillales; f__Streptococcaceae; g__Streptococcus; s__multispecies_spp32_2	5.77471	-0.229767	0.509787	-0.450711	0.652198	0.946169
k__Bacteria; p__Proteobacteria; c__Betaproteobacteria; o__Neisseriales; f__Neisseriaceae; g__Neisseria; s__cinerea	1.38694	0.137082	0.368368	0.372133	0.709794	NA		k__Bacteria; p__Firmicutes; c__Clostridia; o__Clostridiales; f__Peptoniphilaceae; g__Parvimonas; s__micra	2.60759	-0.301498	0.408298	-0.738427	0.460255	0.970945		k__Bacteria; p__Saccharibacteria_(TM7); c__TM7_[C-1]; o__TM7_[O-1]; f__TM7_[F-1]; g__TM7_[G-3]; s__sp._oral_taxon_351	5.62209	0.136969	0.395634	0.346203	0.72919	0.985929		k__Bacteria; p__Proteobacteria; c__Betaproteobacteria; o__Neisseriales; f__Neisseriaceae; g__Eikenella; s__corrodens	1.38575	0.148459	0.488042	0.304192	0.760982	0.946169
k__Bacteria; p__Spirochaetes; c__Spirochaetia; o__Spirochaetales; f__Spirochaetaceae; g__Treponema; s__medium	1.20756	0.104489	0.378876	0.275787	0.782712	NA		k__Bacteria; p__Saccharibacteria_(TM7); c__TM7_[C-1]; o__TM7_[O-1]; f__TM7_[F-1]; g__TM7_[G-3]; s__sp._oral_taxon_351	5.62209	0.152999	0.397721	0.38469	0.700467	0.970945		k__Bacteria; p__Firmicutes; c__Negativicutes; o__Selenomonadales; f__Veillonellaceae; g__Veillonella; s__multispecies_spp27_2	5.7087	0.313055	0.446092	0.701773	0.482821	0.985929		k__Bacteria; p__Proteobacteria; c__Betaproteobacteria; o__Neisseriales; f__Neisseriaceae; g__Kingella; s__denitrificans	1.65922	0.118706	0.48207	0.246243	0.805494	0.946169
k__Bacteria; p__Spirochaetes; c__Spirochaetia; o__Spirochaetales; f__Spirochaetaceae; g__Treponema; s__vincentii	1.11846	0.0220077	0.386844	0.0568903	0.954633	NA		k__Bacteria; p__Firmicutes; c__Negativicutes; o__Selenomonadales; f__Veillonellaceae; g__Veillonella; s__multispecies_spp27_2	4.15975	-0.135095	0.421462	-0.32054	0.748559	0.970945		k__Bacteria; p__Firmicutes; c__Negativicutes; o__Selenomonadales; f__Veillonellaceae; g__Veillonella; s__multispecies_spp28_3	1.11835	0.085103	0.41629	0.204432	0.838016	0.985929		k__Bacteria; p__Firmicutes; c__Clostridia; o__Clostridiales; f__Lachnospiraceae_[XIV]; g__Stomatobaculum; s__longum	2.429	-0.157422	0.517237	-0.304352	0.760859	0.946169
k__Bacteria; p__Firmicutes; c__Bacilli; o__Lactobacillales; f__Streptococcaceae; g__Streptococcus; s__vestibularis	1.08863	0.0773409	0.388927	0.198857	0.842375	NA		k__Bacteria; p__Firmicutes; c__Negativicutes; o__Selenomonadales; f__Veillonellaceae; g__Veillonella; s__multispecies_spp28_3	1.11835	-0.0751466	0.417495	-0.179994	0.857157	0.970945		k__Bacteria; p__Firmicutes; c__Negativicutes; o__Selenomonadales; f__Veillonellaceae; g__Veillonella; s__multispecies_spp29_2	37.2557	-0.15342	0.475327	-0.322767	0.746872	0.985929		k__Bacteria; p__Firmicutes; c__Clostridia; o__Clostridiales; f__Peptococcaceae; g__Peptococcus; s__sp._oral_taxon_168	1.39091	0.148394	0.48826	0.303924	0.761186	0.946169
k__Bacteria; p__Firmicutes; c__Bacilli; o__Lactobacillales; f__Streptococcaceae; g__Streptococcus; s__multispecies_spp2_4	1.12011	0.0220197	0.38686	0.056919	0.95461	NA		k__Bacteria; p__Firmicutes; c__Negativicutes; o__Selenomonadales; f__Veillonellaceae; g__Veillonella; s__multispecies_spp29_2	37.2557	0.144452	0.472739	0.305565	0.759936	0.970945		k__Bacteria; p__Firmicutes; c__Negativicutes; o__Selenomonadales; f__Veillonellaceae; g__Veillonella; s__multispecies_spp30_2	1.54655	-0.470505	0.377962	-1.24485	0.213188	0.985929		k__Bacteria; p__Firmicutes; c__Clostridia; o__Clostridiales; f__Peptostreptococcaceae_[XI]; g__Peptostreptococcaceae_[XI][G-7]; s__sp._oral_taxon_922	1.63094	0.143853	0.479158	0.300221	0.764008	0.946169
k__Bacteria; p__Firmicutes; c__Bacilli; o__Lactobacillales; f__Streptococcaceae; g__Streptococcus; s__salivarius	1.1496	0.0918625	0.383687	0.239421	0.810779	NA		k__Bacteria; p__Firmicutes; c__Negativicutes; o__Selenomonadales; f__Veillonellaceae; g__Veillonella; s__multispecies_spp30_2	1.54655	-0.254344	0.399283	-0.637003	0.524123	0.970945		k__Bacteria; p__Fusobacteria; c__Fusobacteriia; o__Fusobacteriales; f__Leptotrichiaceae; g__Leptotrichia; s__sp._oral_taxon_223	1.32564	0.342725	0.410545	0.834805	0.403827	0.985929		k__Bacteria; p__Proteobacteria; c__Betaproteobacteria; o__Neisseriales; f__Neisseriaceae; g__Neisseria; s__sp._oral_taxon_020	1.59734	0.166007	0.481708	0.344622	0.730379	0.946169
k__Bacteria; p__Actinobacteria; c__Actinobacteria; o__Actinomycetales; f__Actinomycetaceae; g__Actinomyces; s__sp._oral_taxon_169	1.5668	0.0707819	0.35934	0.196977	0.843845	NA		k__Bacteria; p__Fusobacteria; c__Fusobacteriia; o__Fusobacteriales; f__Leptotrichiaceae; g__Leptotrichia; s__sp._oral_taxon_223	1.32564	-0.175748	0.40565	-0.43325	0.664833	0.970945		k__Bacteria; p__Fusobacteria; c__Fusobacteriia; o__Fusobacteriales; f__Leptotrichiaceae; g__Leptotrichia; s__sp._oral_taxon_225	2.0239	0.57781	0.398364	1.45046	0.146931	0.985929		k__Bacteria; p__Actinobacteria; c__Actinobacteria; o__Actinomycetales; f__Micrococcaceae; g__Rothia; s__dentocariosa	14.2089	0.144996	0.551401	0.26296	0.792581	0.946169
k__Bacteria; p__Firmicutes; c__Negativicutes; o__Selenomonadales; f__Veillonellaceae; g__Selenomonas; s__sp._oral_taxon_149	1.14845	0.0916383	0.383677	0.238842	0.811228	NA		k__Bacteria; p__Fusobacteria; c__Fusobacteriia; o__Fusobacteriales; f__Leptotrichiaceae; g__Leptotrichia; s__sp._oral_taxon_225	2.52924	-0.173461	0.414032	-0.418957	0.675248	0.970945		k__Bacteria; p__Fusobacteria; c__Fusobacteriia; o__Fusobacteriales; f__Leptotrichiaceae; g__Leptotrichia; s__multispecies_spp31_2	1.30573	0.308969	0.41306	0.748	0.45446	0.985929		k__Bacteria; p__Firmicutes; c__Negativicutes; o__Selenomonadales; f__Veillonellaceae; g__Veillonella; s__rogosae	29.591	0.260367	0.546879	0.476096	0.634006	0.946169
k__Bacteria; p__Firmicutes; c__Clostridia; o__Clostridiales; f__multifamily; g__multigenus; s__multispecies_spp4_2	1.63352	-0.284323	0.364161	-0.780761	0.434943	NA		k__Bacteria; p__Firmicutes; c__Bacilli; o__Lactobacillales; f__Aerococcaceae; g__Abiotrophia; s__defectiva	3.76672	-0.588252	0.444281	-1.32405	0.185485	0.970945		k__Bacteria; p__Firmicutes; c__Bacilli; o__Lactobacillales; f__Streptococcaceae; g__Streptococcus; s__thermophilus	1.3019	-0.0919637	0.397108	-0.231584	0.816861	0.985929		k__Bacteria; p__Bacteroidetes; c__Flavobacteriia; o__Flavobacteriales; f__Flavobacteriaceae; g__Capnocytophaga; s__leadbetteri	11.8888	0.16018	0.552888	0.289715	0.772035	0.946169
k__Bacteria; p__Bacteroidetes; c__Flavobacteriia; o__Flavobacteriales; f__Flavobacteriaceae; g__Capnocytophaga; s__sp._oral_taxon_902	1.50391	-0.533537	0.378646	-1.40906	0.158816	NA		k__Bacteria; p__Bacteroidetes; c__Bacteroidia; o__Bacteroidales; f__Prevotellaceae; g__Prevotella; s__sp._oral_taxon_475	1.48799	-0.324738	0.410885	-0.790339	0.42933	0.970945		k__Bacteria; p__Bacteroidetes; c__Bacteroidia; o__Bacteroidales; f__Prevotellaceae; g__Prevotella; s__sp._oral_taxon_475	1.48799	0.474483	0.431014	1.10085	0.270961	0.985929		k__Bacteria; p__Firmicutes; c__Negativicutes; o__Selenomonadales; f__Veillonellaceae; g__Veillonella; s__sp._oral_taxon_917	4.02165	0.185633	0.554488	0.334783	0.737789	0.946169
k__Bacteria; p__Synergistetes; c__Synergistia; o__Synergistales; f__Synergistaceae; g__Fretibacterium; s__fastidiosum	1.62674	0.259156	0.357325	0.725268	0.468288	NA		k__Bacteria; p__Firmicutes; c__Bacilli; o__Lactobacillales; f__Streptococcaceae; g__Streptococcus; s__sanguinis	7.36658	0.0825552	0.425522	0.194009	0.846169	0.970945		k__Bacteria; p__Firmicutes; c__Bacilli; o__Lactobacillales; f__Streptococcaceae; g__Streptococcus; s__sanguinis	7.36658	0.263766	0.423442	0.622909	0.533344	0.985929		k__Bacteria; p__Bacteroidetes; c__Bacteroidia; o__Bacteroidales; f__Prevotellaceae; g__Alloprevotella; s__rava	2.79869	-0.182816	0.530007	-0.344931	0.730147	0.946169
k__Bacteria; p__Fusobacteria; c__Fusobacteriia; o__Fusobacteriales; f__Leptotrichiaceae; g__Leptotrichia; s__sp._oral_taxon_218	1.4495	-0.258073	0.370769	-0.696046	0.4864	NA		k__Bacteria; p__Bacteroidetes; c__Bacteroidia; o__Bacteroidales; f__Prevotellaceae; g__Prevotella; s__maculosa	1.08803	-0.0355866	0.418703	-0.0849925	0.932267	0.970945		k__Bacteria; p__Bacteroidetes; c__Bacteroidia; o__Bacteroidales; f__Prevotellaceae; g__Prevotella; s__maculosa	1.08803	-0.106434	0.412784	-0.257844	0.796527	0.985929		k__Bacteria; p__Proteobacteria; c__Betaproteobacteria; o__Neisseriales; f__Neisseriaceae; g__Neisseria; s__pharyngis	3.78426	0.178314	0.528064	0.337676	0.735608	0.946169
k__Bacteria; p__Fusobacteria; c__Fusobacteriia; o__Fusobacteriales; f__Leptotrichiaceae; g__Leptotrichia; s__shahii	1.62774	-0.100421	0.358125	-0.280407	0.779165	NA		k__Bacteria; p__Firmicutes; c__Bacilli; o__Lactobacillales; f__Streptococcaceae; g__Streptococcus; s__sp._oral_taxon_056	2.0459	0.225434	0.374387	0.602142	0.54708	0.970945		k__Bacteria; p__Firmicutes; c__Bacilli; o__Lactobacillales; f__Streptococcaceae; g__Streptococcus; s__sp._oral_taxon_056	2.0459	0.0357567	0.378103	0.0945685	0.924658	0.985929		k__Bacteria; p__Fusobacteria; c__Fusobacteriia; o__Fusobacteriales; f__Fusobacteriaceae; g__Fusobacterium; s__periodonticum	45.8443	0.248676	0.543831	0.457268	0.647479	0.946169
k__Bacteria; p__Proteobacteria; c__Epsilonproteobacteria; o__Campylobacterales; f__Campylobacteraceae; g__Campylobacter; s__showae	1.08868	0.0773453	0.388928	0.198868	0.842366	NA		k__Bacteria; p__Proteobacteria; c__Betaproteobacteria; o__Neisseriales; f__Neisseriaceae; g__Kingella; s__oralis	2.04356	-0.0381299	0.389319	-0.09794	0.92198	0.970945		k__Bacteria; p__Proteobacteria; c__Betaproteobacteria; o__Neisseriales; f__Neisseriaceae; g__Kingella; s__oralis	2.04356	-0.520129	0.373473	-1.39268	0.163716	0.985929		k__Bacteria; p__Fusobacteria; c__Fusobacteriia; o__Fusobacteriales; f__Fusobacteriaceae; g__Fusobacterium; s__nucleatum	2.33889	0.13291	0.481322	0.276136	0.782444	0.946169
k__Bacteria; p__Bacteroidetes; c__Bacteroidia; o__Bacteroidales; f__Prevotellaceae; g__Prevotella; s__scopos	1.61241	0.125041	0.362553	0.344891	0.730177	NA		k__Bacteria; p__Fusobacteria; c__Fusobacteriia; o__Fusobacteriales; f__Leptotrichiaceae; g__Leptotrichia; s__sp._oral_taxon_212	3.14791	-0.350438	0.409724	-0.855302	0.392384	0.970945		k__Bacteria; p__Fusobacteria; c__Fusobacteriia; o__Fusobacteriales; f__Leptotrichiaceae; g__Leptotrichia; s__sp._oral_taxon_212	3.14791	0.524514	0.405633	1.29308	0.195985	0.985929		k__Bacteria; p__Firmicutes; c__Bacilli; o__Lactobacillales; f__Streptococcaceae; g__Streptococcus; s__cristatus	10.9205	-0.231915	0.513147	-0.451946	0.651308	0.946169
k__Bacteria; p__Fusobacteria; c__Fusobacteriia; o__Fusobacteriales; f__Leptotrichiaceae; g__Leptotrichia; s__multispecies_spp8_2	1.119	0.147189	0.385762	0.381555	0.702792	NA		k__Bacteria; p__Actinobacteria; c__Actinobacteria; o__Corynebacteriales; f__Corynebacteriaceae; g__Corynebacterium; s__matruchotii	3.17425	-0.0657638	0.408278	-0.161076	0.872034	0.970945		k__Bacteria; p__Actinobacteria; c__Actinobacteria; o__Corynebacteriales; f__Corynebacteriaceae; g__Corynebacterium; s__matruchotii	3.17425	0.469784	0.407105	1.15396	0.248515	0.985929		k__Bacteria; p__Proteobacteria; c__Betaproteobacteria; o__Neisseriales; f__Neisseriaceae; g__Neisseria; s__oralis	7.64639	-0.165998	0.556437	-0.298323	0.765456	0.946169
k__Bacteria; p__Fusobacteria; c__Fusobacteria; o__Fusobacteriales; f__Fusobacteriaceae; g__Fusobacterium; s__nucleatum_ss_animalis	1.65898	0.0417049	0.357597	0.116625	0.907157	NA		k__Bacteria; p__Saccharibacteria_(TM7); c__TM7_[C-1]; o__TM7_[O-1]; f__TM7_[F-1]; g__TM7_[G-1]; s__sp._oral_taxon_346	1.47518	-0.466886	0.409915	-1.13898	0.25471	0.970945		k__Bacteria; p__Bacteroidetes; c__Bacteroidia; o__Bacteroidales; f__Prevotellaceae; g__Prevotella; s__sp._oral_taxon_317	1.68265	0.210761	0.38975	0.540758	0.588675	0.985929		k__Bacteria; p__Actinobacteria; c__Actinobacteria; o__Actinomycetales; f__Actinomycetaceae; g__Actinomyces; s__lingnae_[NVP]	4.02438	-0.115585	0.483152	-0.23923	0.810927	0.946169
k__Bacteria; p__Fusobacteria; c__Fusobacteriia; o__Fusobacteriales; f__Fusobacteriaceae; g__Fusobacterium; s__multispecies_spp9_3	1.11718	0.021841	0.386834	0.0564608	0.954975	NA		k__Bacteria; p__Actinobacteria; c__Actinobacteria; o__Actinomycetales; f__Actinomycetaceae; g__Actinomyces; s__naeslundii	1.41479	-0.410874	0.410167	-1.00172	0.316477	0.970945		k__Bacteria; p__Actinobacteria; c__Actinobacteria; o__Actinomycetales; f__Actinomycetaceae; g__Actinomyces; s__naeslundii	1.41479	-0.29847	0.385409	-0.774424	0.43868	0.985929		k__Bacteria; p__Fusobacteria; c__Fusobacteriia; o__Fusobacteriales; f__Leptotrichiaceae; g__Leptotrichia; s__sp._oral_taxon_392	2.60616	0.111223	0.510796	0.217744	0.827628	0.957547
k__Bacteria; p__multiphylum; c__multiclass; o__multiorder; f__'Fusobacteriaceae'; g__Fusobacterium; s__multispecies_spp10_5	1.23784	-0.297671	0.382032	-0.779177	0.435876	NA		k__Bacteria; p__Firmicutes; c__Bacilli; o__Lactobacillales; f__Streptococcaceae; g__Streptococcus; s__multispecies_spp33_2	4.09359	-0.428559	0.38841	-1.10337	0.269868	0.970945		k__Bacteria; p__Bacteroidetes; c__Flavobacteriia; o__Flavobacteriales; f__Flavobacteriaceae; g__Capnocytophaga; s__gingivalis	6.16074	0.436061	0.431527	1.01051	0.312253	0.985929		k__Bacteria; p__Bacteroidetes; c__Flavobacteriia; o__Flavobacteriales; f__Flavobacteriaceae; g__Capnocytophaga; s__granulosa	6.08586	0.108658	0.534993	0.203103	0.839055	0.959609
k__Bacteria; p__Fusobacteria; c__Fusobacteriia; o__Fusobacteriales; f__Fusobacteriaceae; g__Fusobacterium; s__multispecies_spp11_4	1.11895	-0.104568	0.388385	-0.269238	0.787746	NA		k__Bacteria; p__Firmicutes; c__Bacilli; o__Lactobacillales; f__Lactobacillaceae; g__Lactobacillus; s__fermentum	1.02682	0.0475231	0.421377	0.11278	0.910205	0.970945		k__Bacteria; p__Firmicutes; c__Bacilli; o__Lactobacillales; f__Streptococcaceae; g__Streptococcus; s__multispecies_spp32_2	5.77471	0.264905	0.401561	0.659688	0.509454	0.985929		k__Bacteria; p__Bacteroidetes; c__Bacteroidia; o__Bacteroidales; f__Prevotellaceae; g__Prevotella; s__sp._oral_taxon_317	1.68265	0.0986496	0.479915	0.205557	0.837137	0.959609
k__Bacteria; p__Fusobacteria; c__Fusobacteriia; o__Fusobacteriales; f__Fusobacteriaceae; g__Fusobacterium; s__sp._oral_taxon_370	1.53418	0.48635	0.360507	1.34907	0.177314	NA		k__Bacteria; p__Firmicutes; c__Negativicutes; o__Selenomonadales; f__Veillonellaceae; g__Selenomonas; s__artemidis	1.59708	-0.436307	0.404101	-1.0797	0.280277	0.970945		k__Bacteria; p__Firmicutes; c__Bacilli; o__Lactobacillales; f__Streptococcaceae; g__Streptococcus; s__multispecies_spp33_2	4.97436	0.523732	0.408193	1.28305	0.199474	0.985929		k__Bacteria; p__Actinobacteria; c__Actinobacteria; o__Actinomycetales; f__Actinomycetaceae; g__Actinomyces; s__naeslundii	1.41479	-0.0957683	0.500754	-0.191248	0.848331	0.964674
k__Bacteria; p__Bacteroidetes; c__Bacteroidia; o__Bacteroidales; f__Prevotellaceae; g__Prevotella; s__sp._Oral_Taxon_299	1.70571	0.00608233	0.361541	0.0168234	0.986578	NA		k__Bacteria; p__Firmicutes; c__Negativicutes; o__Selenomonadales; f__Veillonellaceae; g__Dialister; s__pneumosintes	1.26583	-0.108045	0.406938	-0.265506	0.79062	0.970945		k__Bacteria; p__Firmicutes; c__Bacilli; o__Lactobacillales; f__Lactobacillaceae; g__Lactobacillus; s__fermentum	1.02682	-0.0449707	0.420178	-0.107028	0.914767	0.985929		k__Bacteria; p__SR1; c__SR1_[C-1]; o__SR1_[O-1]; f__SR1_[F-1]; g__SR1_[G-1]; s__sp._oral_taxon_874	1.96461	-0.0829666	0.490279	-0.169223	0.865621	0.978742
k__Bacteria; p__Firmicutes; c__Negativicutes; o__Selenomonadales; f__Veillonellaceae; g__Selenomonas; s__sp._oral_taxon_126	1.44427	0.245898	0.363851	0.675819	0.499156	NA		k__Bacteria; p__Bacteroidetes; c__Bacteroidia; o__Bacteroidales; f__Prevotellaceae; g__Prevotella; s__sp._oral_taxon_396	1.32618	-0.175791	0.4056	-0.433411	0.664716	0.970945		k__Bacteria; p__Firmicutes; c__Clostridia; o__Clostridiales; f__Peptoniphilaceae; g__Peptoniphilaceae_[G-1]; s__sp._oral_taxon_113	1.24015	0.239278	0.412896	0.579511	0.562245	0.985929		k__Bacteria; p__Proteobacteria; c__Betaproteobacteria; o__Neisseriales; f__Neisseriaceae; g__Neisseria; s__cinerea	1.38694	-0.0709579	0.501185	-0.14158	0.887412	0.981156
k__Bacteria; p__Proteobacteria; c__Betaproteobacteria; o__Neisseriales; f__Neisseriaceae; g__Neisseria; s__multispecies_spp13_2	1.35557	-0.463332	0.379496	-1.22091	0.222119	NA		k__Bacteria; p__Firmicutes; c__Negativicutes; o__Selenomonadales; f__Veillonellaceae; g__Selenomonas; s__multispecies_spp34_3	1.11659	-0.0751141	0.417488	-0.179919	0.857216	0.970945		k__Bacteria; p__Firmicutes; c__Negativicutes; o__Selenomonadales; f__Veillonellaceae; g__Selenomonas; s__artemidis	1.59708	0.355232	0.399314	0.889605	0.373678	0.985929		k__Bacteria; p__Saccharibacteria_(TM7); c__TM7_[C-1]; o__TM7_[O-1]; f__TM7_[F-1]; g__TM7_[G-1]; s__sp._oral_taxon_346	1.47518	0.0704262	0.489036	0.14401	0.885492	0.981156
k__Bacteria; p__Firmicutes; c__Bacilli; o__Bacillales; f__Gemellaceae; g__Gemella; s__morbillorum	1.14775	-0.155551	0.386547	-0.402411	0.687382	NA		k__Bacteria; p__Proteobacteria; c__Betaproteobacteria; o__Neisseriales; f__Neisseriaceae; g__Eikenella; s__corrodens	1.38575	0.277065	0.385735	0.718277	0.472587	0.970945		k__Bacteria; p__Firmicutes; c__Negativicutes; o__Selenomonadales; f__Veillonellaceae; g__Dialister; s__pneumosintes	1.26583	0.134871	0.406604	0.3317	0.740116	0.985929		k__Bacteria; p__Proteobacteria; c__Gammaproteobacteria; o__Pasteurellales; f__Pasteurellaceae; g__Aggregatibacter; s__multispecies_spp36_2	1.38716	-0.070831	0.500586	-0.141496	0.887478	0.981156
k__Bacteria; p__Firmicutes; c__Bacilli; o__Bacillales; f__Staphylococcaceae; g__Gemella; s__multispecies_spp14_2	1.11718	0.021841	0.386834	0.0564608	0.954975	NA		k__Bacteria; p__Firmicutes; c__Negativicutes; o__Selenomonadales; f__Veillonellaceae; g__Selenomonas; s__sp._oral_taxon_919	1.2355	-0.0727755	0.407777	-0.178469	0.858355	0.970945		k__Bacteria; p__Bacteroidetes; c__Bacteroidia; o__Bacteroidales; f__Prevotellaceae; g__Prevotella; s__sp._oral_taxon_396	1.32618	0.342873	0.410405	0.835451	0.403464	0.985929		k__Bacteria; p__Saccharibacteria_(TM7); c__TM7_[C-1]; o__TM7_[O-1]; f__TM7_[F-1]; g__TM7_[G-1]; s__sp._oral_taxon_352	46.9531	-0.0773405	0.542215	-0.142638	0.886576	0.981156
k__Bacteria; p__Firmicutes; c__Bacilli; o__Lactobacillales; f__Streptococcaceae; g__Streptococcus; s__multispecies_spp15_2	1.39211	-0.176921	0.370636	-0.477346	0.633116	NA		k__Bacteria; p__Saccharibacteria_(TM7); c__TM7_[C-1]; o__TM7_[O-1]; f__TM7_[F-2]; g__TM7_[G-5]; s__sp._oral_taxon_356	1.99849	-0.657049	0.445488	-1.4749	0.14024	0.970945		k__Bacteria; p__Firmicutes; c__Clostridia; o__Clostridiales; f__Lachnospiraceae_[XIV]; g__Lachnospiraceae_[G-2]; s__sp._oral_taxon_096	1.96089	-0.284035	0.39853	-0.712707	0.476027	0.985929		k__Bacteria; p__Bacteroidetes; c__Bacteroidia; o__Bacteroidales; f__Porphyromonadaceae; g__Tannerella; s__sp._oral_taxon_286	2.20114	-0.0625833	0.490538	-0.127581	0.898481	0.987832
k__Bacteria; p__Firmicutes; c__Bacilli; o__Lactobacillales; f__Streptococcaceae; g__Streptococcus; s__peroris	1.44798	-0.362379	0.370708	-0.97753	0.328307	NA		k__Bacteria; p__Firmicutes; c__Bacilli; o__Lactobacillales; f__Streptococcaceae; g__Streptococcus; s__anginosus	1.62368	-0.593714	0.410252	-1.44719	0.147843	0.970945		k__Bacteria; p__Firmicutes; c__Negativicutes; o__Selenomonadales; f__Veillonellaceae; g__Selenomonas; s__multispecies_spp34_3	1.11659	0.0850041	0.416301	0.204189	0.838206	0.985929		k__Bacteria; p__Actinobacteria; c__Actinobacteria; o__Actinomycetales; f__Actinomycetaceae; g__Actinomyces; s__multispecies_spp6_2	1.90302	-0.0472592	0.488347	-0.0967738	0.922906	0.992987
k__Bacteria; p__Actinobacteria; c__Actinobacteria; o__Corynebacteriales; f__Corynebacteriaceae; g__Corynebacterium; s__durum	1.14878	0.213664	0.382874	0.558052	0.576809	NA		k__Bacteria; p__Bacteroidetes; c__Bacteroidia; o__Bacteroidales; f__Prevotellaceae; g__Prevotella; s__sp._oral_taxon_443	1.84056	-0.491014	0.410608	-1.19582	0.231767	0.970945		k__Bacteria; p__Proteobacteria; c__Betaproteobacteria; o__Neisseriales; f__Neisseriaceae; g__Eikenella; s__corrodens	1.38575	0.142858	0.399143	0.357911	0.72041	0.985929		k__Bacteria; p__Bacteroidetes; c__Bacteroidia; o__Bacteroidales; f__Prevotellaceae; g__Prevotella; s__salivae	23.926	-0.0501572	0.555989	-0.0902126	0.928118	0.992987
k__Bacteria; p__Fusobacteria; c__Fusobacteriia; o__Fusobacteriales; f__Leptotrichiaceae; g__Leptotrichia; s__multispecies_spp16_2	1.23757	0.0531729	0.377174	0.140977	0.887888	NA		k__Bacteria; p__Firmicutes; c__Clostridia; o__Clostridiales; f__Peptostreptococcaceae_[XI]; g__Peptostreptococcaceae_[XI][G-5]; s__[Eubacterium]_saphenum	1.14785	0.0398791	0.410787	0.0970797	0.922663	0.970945		k__Bacteria; p__Firmicutes; c__Negativicutes; o__Selenomonadales; f__Veillonellaceae; g__Selenomonas; s__sp._oral_taxon_919	1.2355	-0.170833	0.399008	-0.428144	0.668546	0.985929		k__Bacteria; p__Firmicutes; c__Negativicutes; o__Selenomonadales; f__Veillonellaceae; g__Selenomonas; s__sp._oral_taxon_137	1.50372	0.0459292	0.489361	0.0938556	0.925224	0.992987
k__Bacteria; p__Proteobacteria; c__Gammaproteobacteria; o__Pasteurellales; f__Pasteurellaceae; g__Haemophilus; s__sp._oral_taxon_036	1.08745	0.0772362	0.388918	0.198593	0.842581	NA		k__Bacteria; p__Actinobacteria; c__Actinobacteria; o__Actinomycetales; f__Actinomycetaceae; g__Actinomyces; s__meyeri	1.11846	0.0798571	0.41198	0.193837	0.846303	0.970945		k__Bacteria; p__Firmicutes; c__Bacilli; o__Lactobacillales; f__Streptococcaceae; g__Streptococcus; s__anginosus	1.62368	-0.551591	0.374451	-1.47307	0.140733	0.985929		k__Bacteria; p__Bacteroidetes; c__Bacteroidia; o__Bacteroidales; f__Prevotellaceae; g__Prevotella; s__histicola	88.6828	0.0547967	0.552008	0.0992679	0.920926	0.992987
k__Bacteria; p__Proteobacteria; c__Gammaproteobacteria; o__Pasteurellales; f__Pasteurellaceae; g__Aggregatibacter; s__aphrophilus	1.65592	-0.313882	0.368809	-0.851069	0.394731	NA		k__Bacteria; p__Proteobacteria; c__Gammaproteobacteria; o__Pasteurellales; f__Pasteurellaceae; g__Aggregatibacter; s__actinomycetemcomitans	1.14676	-0.11343	0.416376	-0.272421	0.785298	0.970945		k__Bacteria; p__Bacteroidetes; c__Bacteroidia; o__Bacteroidales; f__Prevotellaceae; g__Prevotella; s__sp._oral_taxon_443	1.84056	0.437857	0.407081	1.0756	0.282104	0.985929		k__Bacteria; p__Firmicutes; c__Clostridia; o__Clostridiales; f__Lachnospiraceae_[XIV]; g__Oribacterium; s__sinus	9.15072	0.0568572	0.537273	0.105826	0.915721	0.992987
k__Bacteria; p__Fusobacteria; c__Fusobacteriia; o__Fusobacteriales; f__Fusobacteriaceae; g__Fusobacterium; s__nucleatum_subsp._animalis	1.08779	-0.0513848	0.390268	-0.131665	0.895249	NA		k__Bacteria; p__Fusobacteria; c__Fusobacteriia; o__Fusobacteriales; f__Fusobacteriaceae; g__Fusobacterium; s__multispecies_spp35_3	1.1784	0.147009	0.404601	0.363343	0.716349	0.970945		k__Bacteria; p__Firmicutes; c__Clostridia; o__Clostridiales; f__Peptostreptococcaceae_[XI]; g__Peptostreptococcaceae_[XI][G-5]; s__[Eubacterium]_saphenum	1.14785	-0.0206669	0.410355	-0.0503634	0.959833	0.985929		k__Bacteria; p__Bacteroidetes; c__Bacteroidia; o__Bacteroidales; f__Prevotellaceae; g__Prevotella; s__melaninogenica	119.237	0.0400032	0.547803	0.0730248	0.941786	0.994082
k__Bacteria; p__Fusobacteria; c__Fusobacteriia; o__Fusobacteriales; f__Fusobacteriaceae; g__Fusobacterium; s__multispecies_spp18_2	1.14819	0.0915499	0.383675	0.238613	0.811405	NA		k__Bacteria; p__Fusobacteria; c__Fusobacteriia; o__Fusobacteriales; f__Leptotrichiaceae; g__Leptotrichia; s__sp._oral_taxon_498	1.59607	-0.306393	0.400951	-0.764164	0.444769	0.970945		k__Bacteria; p__Actinobacteria; c__Actinobacteria; o__Actinomycetales; f__Actinomycetaceae; g__Actinomyces; s__meyeri	1.11846	0.0851082	0.416291	0.204444	0.838007	0.985929		k__Bacteria; p__Firmicutes; c__Negativicutes; o__Selenomonadales; f__Veillonellaceae; g__Selenomonas; s__sp._oral_taxon_478	2.26711	0.0406998	0.521993	0.0779701	0.937852	0.994082
k__Bacteria; p__Firmicutes; c__Clostridia; o__Clostridiales; f__Peptoniphilaceae; g__Parvimonas; s__multispecies_spp19_2	1.56639	-0.117058	0.36303	-0.322446	0.747115	NA		k__Bacteria; p__Saccharibacteria_(TM7); c__TM7_[C-1]; o__TM7_[O-1]; f__TM7_[F-1]; g__TM7_[G-1]; s__sp._oral_taxon_347	1.83771	0.133901	0.393145	0.340589	0.733413	0.970945		k__Bacteria; p__Proteobacteria; c__Gammaproteobacteria; o__Pasteurellales; f__Pasteurellaceae; g__Aggregatibacter; s__actinomycetemcomitans	1.14676	-0.298936	0.40233	-0.743013	0.457474	0.985929		k__Bacteria; p__Bacteroidetes; c__Bacteroidia; o__Bacteroidales; f__Porphyromonadaceae; g__Porphyromonas; s__catoniae	1.77333	0.0315733	0.494825	0.063807	0.949124	0.994082
k__Bacteria; p__Bacteroidetes; c__Bacteroidia; o__Bacteroidales; f__Prevotellaceae; g__Prevotella; s__multispecies_spp20_2	1.23843	0.395747	0.375494	1.05394	0.291912	NA		k__Bacteria; p__Firmicutes; c__Negativicutes; o__Selenomonadales; f__Veillonellaceae; g__Veillonella; s__sp._oral_taxon_780	1.5377	-0.52006	0.409889	-1.26878	0.204519	0.970945		k__Bacteria; p__SR1; c__SR1_[C-1]; o__SR1_[O-1]; f__SR1_[F-1]; g__SR1_[G-1]; s__sp._oral_taxon_874	1.96461	0.141897	0.386445	0.367186	0.71348	0.985929		k__Bacteria; p__Fusobacteria; c__Fusobacteriia; o__Fusobacteriales; f__Fusobacteriaceae; g__Fusobacterium; s__multispecies_spp46_2	1.76897	0.0329391	0.490814	0.067111	0.946493	0.994082
k__Bacteria; p__Bacteroidetes; c__Bacteroidia; o__Bacteroidales; f__Prevotellaceae; g__Prevotella; s__multispecies_spp21_4	1.08803	-0.0514011	0.390271	-0.131706	0.895217	NA		k__Bacteria; p__Bacteroidetes; c__Bacteroidia; o__Bacteroidales; f__Prevotellaceae; g__Prevotella; s__sp._oral_taxon_300	1.14888	-0.113475	0.41638	-0.272528	0.785216	0.970945		k__Bacteria; p__Fusobacteria; c__Fusobacteriia; o__Fusobacteriales; f__Fusobacteriaceae; g__Fusobacterium; s__multispecies_spp35_3	1.1784	-0.119613	0.40494	-0.295384	0.767701	0.985929		k__Bacteria; p__Firmicutes; c__Negativicutes; o__Selenomonadales; f__Veillonellaceae; g__Veillonella; s__multispecies_spp30_2	1.54655	0.0217669	0.489988	0.0444234	0.964567	0.997559
k__Bacteria; p__Bacteroidetes; c__Bacteroidia; o__Bacteroidales; f__Prevotellaceae; g__Prevotella; s__multispecies_spp22_3	1.48382	0.58586	0.366877	1.59689	0.110291	NA		k__Bacteria; p__Saccharibacteria_(TM7); c__TM7_[C-1]; o__TM7_[O-1]; f__TM7_[F-1]; g__TM7_[G-1]; s__sp._oral_taxon_952	1.68434	-0.149233	0.39008	-0.382571	0.702038	0.970945		k__Bacteria; p__Proteobacteria; c__Betaproteobacteria; o__Neisseriales; f__Neisseriaceae; g__Kingella; s__denitrificans	1.65922	0.294987	0.396349	0.74426	0.456719	0.985929		k__Bacteria; p__Bacteroidetes; c__Flavobacteriia; o__Flavobacteriales; f__Flavobacteriaceae; g__Capnocytophaga; s__gingivalis	6.16074	0.0217095	0.532531	0.0407668	0.967482	0.997559
k__Bacteria; p__Spirochaetes; c__Spirochaetia; o__Spirochaetales; f__Spirochaetaceae; g__Treponema; s__socranskii	1.29497	0.176485	0.372421	0.473886	0.635582	NA		k__Bacteria; p__Proteobacteria; c__Gammaproteobacteria; o__Pasteurellales; f__Pasteurellaceae; g__Aggregatibacter; s__multispecies_spp36_2	1.38716	-0.103487	0.399095	-0.259303	0.795401	0.970945		k__Bacteria; p__Fusobacteria; c__Fusobacteriia; o__Fusobacteriales; f__Leptotrichiaceae; g__Leptotrichia; s__sp._oral_taxon_498	1.59607	-0.393754	0.380801	-1.03402	0.301129	0.985929		k__Bacteria; p__Proteobacteria; c__Betaproteobacteria; o__Neisseriales; f__Neisseriaceae; g__Neisseria; s__multispecies_spp38_2	15.5192	-0.0251821	0.555534	-0.0453295	0.963845	0.997559
k__Bacteria; p__Proteobacteria; c__Gammaproteobacteria; o__Pasteurellales; f__Pasteurellaceae; g__Aggregatibacter; s__paraphrophilus	1.20645	-0.131596	0.381557	-0.344893	0.730175	NA		k__Bacteria; p__SR1; c__SR1_[C-1]; o__SR1_[O-1]; f__SR1_[F-1]; g__SR1_[G-1]; s__sp._oral_taxon_345	1.9665	0.297562	0.377195	0.78888	0.430182	0.970945		k__Bacteria; p__Firmicutes; c__Negativicutes; o__Selenomonadales; f__Veillonellaceae; g__Veillonella; s__sp._oral_taxon_780	1.5377	0.298957	0.399886	0.747606	0.454698	0.985929		k__Bacteria; p__Bacteroidetes; c__Bacteroidia; o__Bacteroidales; f__Prevotellaceae; g__Prevotella; s__nanceiensis	15.4823	-0.000474736	0.54798	-0.000866339	0.999309	0.999309
k__Bacteria; p__Actinobacteria; c__Actinobacteria; o__Actinomycetales; f__Actinomycetaceae; g__Actinomyces; s__johnsonii	1.11718	0.021841	0.386834	0.0564608	0.954975	NA		k__Bacteria; p__Proteobacteria; c__Gammaproteobacteria; o__Cardiobacteriales; f__Cardiobacteriaceae; g__Cardiobacterium; s__hominis	2.45193	-0.146949	0.400617	-0.366807	0.713763	0.970945		k__Bacteria; p__Bacteroidetes; c__Bacteroidia; o__Bacteroidales; f__Prevotellaceae; g__Prevotella; s__sp._oral_taxon_300	1.14888	-0.0205283	0.410371	-0.0500238	0.960103	0.985929		k__Bacteria; p__Bacteroidetes; c__Bacteroidia; o__Bacteroidales; f__Prevotellaceae; g__Prevotella; s__sp._oral_taxon_305	2.88906	-0.00992444	0.521434	-0.019033	0.984815	0.999309
k__Bacteria; p__Firmicutes; c__Clostridia; o__Clostridiales; f__Lachnospiraceae_[XIV]; g__Lachnospiraceae_[G-3]; s__sp._oral_taxon_100	1.62756	0.348251	0.357004	0.975481	0.329322	NA		k__Bacteria; p__Bacteroidetes; c__Flavobacteriia; o__Flavobacteriales; f__Flavobacteriaceae; g__Capnocytophaga; s__sp._oral_taxon_380	1.11776	0.229018	0.407025	0.562665	0.573663	0.970945		k__Bacteria; p__Saccharibacteria_(TM7); c__TM7_[C-1]; o__TM7_[O-1]; f__TM7_[F-1]; g__TM7_[G-1]; s__sp._oral_taxon_952	1.68434	0.555346	0.402813	1.37867	0.167997	0.985929		k__Bacteria; p__Bacteroidetes; c__Bacteroidia; o__Bacteroidales; f__Prevotellaceae; g__Prevotella; s__sp._oral_taxon_309	2.8718	0.00513363	0.521899	0.00983645	0.992152	0.999309
k__Bacteria; p__Fusobacteria; c__Fusobacteriia; o__Fusobacteriales; f__Leptotrichiaceae; g__Leptotrichia; s__sp._oral_taxon_219	1.56393	-0.0235973	0.360203	-0.0655112	0.947767	NA		k__Bacteria; p__Firmicutes; c__Clostridia; o__Clostridiales; f__Lachnospiraceae_[XIV]; g__Stomatobaculum; s__longum	1.87044	-0.407802	0.396212	-1.02925	0.303361	0.970945		k__Bacteria; p__Proteobacteria; c__Gammaproteobacteria; o__Pasteurellales; f__Pasteurellaceae; g__Aggregatibacter; s__multispecies_spp36_2	1.38716	-0.338129	0.384856	-0.878587	0.379625	0.985929		k__Bacteria; p__Firmicutes; c__Clostridia; o__Clostridiales; f__Lachnospiraceae_[XIV]; g__Lachnoanaerobaculum; s__orale	6.69491	0.0138072	0.548384	0.0251781	0.979913	0.999309
k__Bacteria; p__Firmicutes; c__Bacilli; o__Lactobacillales; f__Streptococcaceae; g__Streptococcus; s__multispecies_spp23_15	1.2414	0.168122	0.376366	0.446699	0.655092	NA		k__Bacteria; p__Firmicutes; c__Clostridia; o__Clostridiales; f__Clostridiales_[F]; g__Clostridiales_[G]; s__sp._Oral_Taxon_G74	1.17488	-0.150518	0.415345	-0.362392	0.717059	0.970945		k__Bacteria; p__SR1; c__SR1_[C-1]; o__SR1_[O-1]; f__SR1_[F-1]; g__SR1_[G-1]; s__sp._oral_taxon_345	1.9665	0.143347	0.386609	0.370779	0.710802	0.985929		k__Bacteria; p__Firmicutes; c__Negativicutes; o__Selenomonadales; f__Veillonellaceae; g__Dialister; s__invisus	1.56719	-0.00131195	0.487881	-0.00268908	0.997854	0.999309
k__Bacteria; p__Bacteroidetes; c__Flavobacteriia; o__Flavobacteriales; f__Flavobacteriaceae; g__Capnocytophaga; s__ochracea	1.18061	-0.204866	0.385057	-0.532042	0.594697	NA		k__Bacteria; p__Firmicutes; c__Clostridia; o__Clostridiales; f__Peptococcaceae; g__Peptococcus; s__sp._oral_taxon_168	1.39091	0.153955	0.389954	0.394802	0.692989	0.970945		k__Bacteria; p__Proteobacteria; c__Gammaproteobacteria; o__Cardiobacteriales; f__Cardiobacteriaceae; g__Cardiobacterium; s__hominis	2.45193	-0.30185	0.386801	-0.780376	0.43517	0.985929		k__Bacteria; p__Firmicutes; c__Bacilli; o__Lactobacillales; f__Streptococcaceae; g__Streptococcus; s__intermedius	2.35825	-0.00363845	0.491505	-0.00740267	0.994094	0.999309
k__Bacteria; p__Saccharibacteria_(TM7); c__TM7_[C-1]; o__TM7_[O-1]; f__TM7_[F-1]; g__TM7_[G-1]; s__sp._oral_taxon_348	1.68312	-0.444496	0.363738	-1.22202	0.221699	NA		k__Bacteria; p__Bacteroidetes; c__Bacteroidia; o__Bacteroidales; f__Porphyromonadaceae; g__Porphyromonas; s__sp._oral_taxon_285	1.63451	0.436799	0.377048	1.15847	0.246673	0.970945		k__Bacteria; p__Bacteroidetes; c__Flavobacteriia; o__Flavobacteriales; f__Flavobacteriaceae; g__Capnocytophaga; s__sp._oral_taxon_380	1.11776	0.0850666	0.416314	0.204333	0.838094	0.985929		k__Bacteria; p__Fusobacteria; c__Fusobacteriia; o__Fusobacteriales; f__Leptotrichiaceae; g__Leptotrichia; s__multispecies_sppn1_2_nov_97.99%	1.23869	0.291295	0.489935	0.594559	0.552138	NA
k__Bacteria; p__Bacteroidetes; c__Bacteroidia; o__Bacteroidales; f__Porphyromonadaceae; g__Porphyromonas; s__multispecies_spp25_2	1.11718	0.147018	0.385746	0.381126	0.70311	NA		k__Bacteria; p__Firmicutes; c__Clostridia; o__Clostridiales; f__Peptococcaceae; g__Peptococcus; s__sp._oral_taxon_167	1.26793	-0.255503	0.412757	-0.619015	0.535906	0.970945		k__Bacteria; p__Spirochaetes; c__Spirochaetia; o__Spirochaetales; f__Spirochaetaceae; g__Treponema; s__denticola	2.56521	0.420981	0.435763	0.966077	0.334006	0.985929		k__Bacteria; p__Bacteroidetes; c__Flavobacteriia; o__Flavobacteriales; f__Flavobacteriaceae; g__Bergeyella; s__sp._oral_taxon_907_nov_97.42%	1.17721	-0.131182	0.517483	-0.253501	0.799881	NA
k__Bacteria; p__Firmicutes; c__Mollicutes; o__Mycoplasmatales; f__Mycoplasmataceae; g__Mycoplasma; s__orale	1.08803	-0.0514011	0.390271	-0.131706	0.895217	NA		k__Bacteria; p__Actinobacteria; c__Actinobacteria; o__Actinomycetales; f__Actinomycetaceae; g__Actinomyces; s__sp._oral_taxon_178	1.11752	-0.0751318	0.41749	-0.179961	0.857183	0.970945		k__Bacteria; p__Firmicutes; c__Clostridia; o__Clostridiales; f__Clostridiales_[F]; g__Clostridiales_[G]; s__sp._Oral_Taxon_G74	1.17488	0.164431	0.41435	0.39684	0.691485	0.985929		k__Bacteria; p__Proteobacteria; c__Betaproteobacteria; o__Neisseriales; f__Neisseriaceae; g__Neisseria; s__sp._oral_taxon_018_nov_97.67%	1.17721	-0.131182	0.517483	-0.253501	0.799881	NA
k__Bacteria; p__Proteobacteria; c__Betaproteobacteria; o__Neisseriales; f__Neisseriaceae; g__Neisseria; s__sp._oral_taxon_018	1.69443	0.65048	0.396894	1.63893	0.101229	NA		k__Bacteria; p__Bacteroidetes; c__Flavobacteriia; o__Flavobacteriales; f__Flavobacteriaceae; g__Capnocytophaga; s__sp._oral_taxon_336	1.32559	-0.320341	0.411452	-0.778561	0.436238	0.970945		k__Bacteria; p__Firmicutes; c__Clostridia; o__Clostridiales; f__Peptococcaceae; g__Peptococcus; s__sp._oral_taxon_168	1.39091	-0.222571	0.388093	-0.573499	0.566307	0.985929		k__Bacteria; p__Bacteroidetes; c__Flavobacteriia; o__Flavobacteriales; f__Flavobacteriaceae; g__Capnocytophaga; s__multispecies_sppn1_2_nov_96.35%	1.17962	-0.131232	0.517473	-0.253601	0.799804	NA
k__Bacteria; p__Firmicutes; c__Bacilli; o__Lactobacillales; f__Streptococcaceae; g__Streptococcus; s__sinensis	1.45363	0.0471263	0.364325	0.129353	0.897079	NA		k__Bacteria; p__Fusobacteria; c__Fusobacteria; o__Fusobacteriales; f__Leptotrichiaceae; g__Leptotrichia; s__sp._Oral_Taxon_B57	1.35313	-0.351086	0.411158	-0.853896	0.393163	0.970945		k__Bacteria; p__Bacteroidetes; c__Bacteroidia; o__Bacteroidales; f__Porphyromonadaceae; g__Porphyromonas; s__sp._oral_taxon_275	1.17663	0.0201376	0.40921	0.0492111	0.960751	0.985929		k__Bacteria; p__Firmicutes; c__Clostridia; o__Clostridiales; f__multifamily; g__multigenus; s__multispecies_sppn1_2_nov_96.21%	1.11841	-0.073219	0.518989	-0.14108	0.887807	NA
k__Bacteria; p__Proteobacteria; c__Gammaproteobacteria; o__Pseudomonadales; f__Moraxellaceae; g__Moraxella; s__sp._Oral_Taxon_B07	1.0581	0.00387727	0.392374	0.00988158	0.992116	NA		k__Bacteria; p__Proteobacteria; c__Betaproteobacteria; o__Neisseriales; f__Neisseriaceae; g__Kingella; s__sp._oral_taxon_932	1.14749	-0.113444	0.416382	-0.272453	0.785274	0.970945		k__Bacteria; p__Firmicutes; c__Clostridia; o__Clostridiales; f__Peptococcaceae; g__Peptococcus; s__sp._oral_taxon_167	1.26793	-0.257977	0.394522	-0.653899	0.513177	0.985929		k__Bacteria; p__Firmicutes; c__Negativicutes; o__Selenomonadales; f__Sporomusaceae; g__multigenus; s__multispecies_sppn1_2_nov_87.50%	1.11905	-0.0732273	0.518993	-0.141095	0.887795	NA
k__Bacteria; p__Synergistetes; c__Synergistia; o__Synergistales; f__Synergistaceae; g__Fretibacterium; s__sp._oral_taxon_362	1.11752	0.0219173	0.386836	0.0566579	0.954818	NA		k__Bacteria; p__Firmicutes; c__Clostridia; o__Clostridiales; f__Lachnospiraceae_[XIV]; g__Lachnospiraceae_[G-8]; s__sp._oral_taxon_500	1.44703	-0.166292	0.398325	-0.417479	0.676328	0.970945		k__Bacteria; p__Actinobacteria; c__Actinobacteria; o__Actinomycetales; f__Actinomycetaceae; g__Actinomyces; s__sp._oral_taxon_178	1.11752	-0.0627556	0.411499	-0.152505	0.878789	0.985929		k__Bacteria; p__Spirochaetes; c__Spirochaetia; o__Spirochaetales; f__Spirochaetaceae; g__Treponema; s__medium	1.20756	-0.159051	0.516761	-0.307785	0.758246	NA
k__Bacteria; p__Synergistetes; c__Synergistia; o__Synergistales; f__Synergistaceae; g__Fretibacterium; s__multispecies_spp26_2	1.11895	-0.104568	0.388385	-0.269238	0.787746	NA		k__Bacteria; p__Firmicutes; c__Negativicutes; o__Selenomonadales; f__Veillonellaceae; g__Mitsuokella; s__sp._oral_taxon_131	1.08803	-0.0355866	0.418703	-0.0849925	0.932267	0.970945		k__Bacteria; p__Bacteroidetes; c__Flavobacteriia; o__Flavobacteriales; f__Flavobacteriaceae; g__Capnocytophaga; s__sp._oral_taxon_336	1.32559	-0.299224	0.389798	-0.76764	0.442701	0.985929		k__Bacteria; p__Spirochaetes; c__Spirochaetia; o__Spirochaetales; f__Spirochaetaceae; g__Treponema; s__vincentii	1.11846	0.184322	0.505603	0.364559	0.715441	NA
k__Bacteria; p__Proteobacteria; c__Gammaproteobacteria; o__Pasteurellales; f__Pasteurellaceae; g__Haemophilus; s__pittmaniae	1.56511	-0.501114	0.374159	-1.33931	0.18047	NA		k__Bacteria; p__Bacteroidetes; c__Bacteroidia; o__Bacteroidales; f__Prevotellaceae; g__Prevotella; s__micans	1.29405	-0.142364	0.406244	-0.35044	0.726009	0.970945		k__Bacteria; p__Fusobacteria; c__Fusobacteria; o__Fusobacteriales; f__Leptotrichiaceae; g__Leptotrichia; s__sp._Oral_Taxon_B57	1.35313	0.107732	0.401128	0.268573	0.788258	0.985929		k__Bacteria; p__Firmicutes; c__Bacilli; o__Lactobacillales; f__Streptococcaceae; g__Streptococcus; s__vestibularis	1.08863	-0.0430082	0.519838	-0.0827339	0.934063	NA
k__Bacteria; p__Saccharibacteria_(TM7); c__TM7_[C-1]; o__TM7_[O-1]; f__TM7_[F-1]; g__TM7_[G-1]; s__sp._oral_taxon_349	1.62712	-0.475515	0.364462	-1.3047	0.191993	NA		k__Bacteria; p__Firmicutes; c__Negativicutes; o__Selenomonadales; f__Veillonellaceae; g__Selenomonas; s__dianae	1.3834	-0.10328	0.399414	-0.25858	0.79596	0.970945		k__Bacteria; p__Proteobacteria; c__Betaproteobacteria; o__Neisseriales; f__Neisseriaceae; g__Kingella; s__sp._oral_taxon_932	1.14749	-0.299042	0.402336	-0.743265	0.457321	0.985929		k__Bacteria; p__Firmicutes; c__Bacilli; o__Lactobacillales; f__Streptococcaceae; g__Streptococcus; s__multispecies_spp2_4	1.12011	-0.0732402	0.518999	-0.141118	0.887777	NA
k__Bacteria; p__Firmicutes; c__Negativicutes; o__Selenomonadales; f__Veillonellaceae; g__Veillonella; s__multispecies_spp28_3	1.11835	0.0218557	0.386845	0.0564973	0.954946	NA		k__Bacteria; p__Bacteroidetes; c__Bacteroidetes_[C-1]; o__Bacteroidetes_[O-1]; f__Bacteroidetes_[F-1]; g__Bacteroidetes_[G-3]; s__sp._oral_taxon_280	1.20461	-0.186523	0.414394	-0.450111	0.652631	0.970945		k__Bacteria; p__Firmicutes; c__Clostridia; o__Clostridiales; f__Lachnospiraceae_[XIV]; g__Lachnospiraceae_[G-8]; s__sp._oral_taxon_500	1.44703	-0.14981	0.386914	-0.387193	0.698614	0.985929		k__Bacteria; p__Firmicutes; c__Bacilli; o__Lactobacillales; f__Streptococcaceae; g__Streptococcus; s__salivarius	1.1496	0.152828	0.504786	0.302759	0.762074	NA
k__Bacteria; p__Firmicutes; c__Negativicutes; o__Selenomonadales; f__Veillonellaceae; g__Veillonella; s__multispecies_spp30_2	1.54655	-0.371819	0.368763	-1.00829	0.313317	NA		k__Bacteria; p__Bacteroidetes; c__Bacteroidetes_[C-1]; o__Bacteroidetes_[O-1]; f__Bacteroidetes_[F-1]; g__Bacteroidetes_[G-5]; s__sp._oral_taxon_505	1.35265	-0.351057	0.411164	-0.853815	0.393208	0.970945		k__Bacteria; p__Firmicutes; c__Negativicutes; o__Selenomonadales; f__Veillonellaceae; g__Mitsuokella; s__sp._oral_taxon_131	1.08803	0.0432434	0.417487	0.10358	0.917502	0.985929		k__Bacteria; p__Actinobacteria; c__Actinobacteria; o__Actinomycetales; f__Actinomycetaceae; g__Actinomyces; s__sp._oral_taxon_172	7.15846	0.994006	0.537817	1.84822	NA	NA
k__Bacteria; p__Fusobacteria; c__Fusobacteriia; o__Fusobacteriales; f__Leptotrichiaceae; g__Leptotrichia; s__sp._oral_taxon_223	1.32564	0.234546	0.370207	0.633553	0.526373	NA		k__Bacteria; p__Fusobacteria; c__Fusobacteria; o__Fusobacteria_[O]; f__Fusobacteria_[F]; g__Fusobacteria_[G-1]; s__sp._Oral_Taxon_A71	1.80533	-0.329584	0.433242	-0.760739	0.446813	0.970945		k__Bacteria; p__Bacteroidetes; c__Bacteroidia; o__Bacteroidales; f__Prevotellaceae; g__Prevotella; s__micans	1.29405	0.0370856	0.401473	0.0923737	0.926401	0.985929		k__Bacteria; p__Firmicutes; c__Negativicutes; o__Selenomonadales; f__Veillonellaceae; g__Selenomonas; s__sp._oral_taxon_149	1.14845	0.152945	0.50477	0.302999	0.76189	NA
k__Bacteria; p__Fusobacteria; c__Fusobacteriia; o__Fusobacteriales; f__Leptotrichiaceae; g__Leptotrichia; s__multispecies_spp31_2	1.30573	0.504073	0.373852	1.34832	0.177554	NA		k__Bacteria; p__Actinobacteria; c__Actinobacteria; o__Actinomycetales; f__Actinomycetaceae; g__Actinomyces; s__sp._oral_taxon_448	1.08873	0.121126	0.413271	0.29309	0.769453	0.970945		k__Bacteria; p__Firmicutes; c__Negativicutes; o__Selenomonadales; f__Veillonellaceae; g__Selenomonas; s__dianae	1.3834	0.0175687	0.396015	0.0443637	0.964614	0.985929		k__Bacteria; p__Firmicutes; c__Negativicutes; o__Selenomonadales; f__Veillonellaceae; g__Selenomonas; s__multispecies_spp3_2	2.54034	0.951573	0.490599	1.93961	NA	NA
k__Bacteria; p__Firmicutes; c__Bacilli; o__Lactobacillales; f__Streptococcaceae; g__Streptococcus; s__thermophilus	1.3019	0.0674303	0.372866	0.180843	0.856491	NA		k__Bacteria; p__Actinobacteria; c__Actinobacteria; o__Actinomycetales; f__Micrococcaceae; g__Rothia; s__mucilaginosa	114.434	-0.0480158	0.387524	-0.123904	0.901391	0.970945		k__Bacteria; p__Firmicutes; c__Clostridia; o__Clostridiales; f__Peptostreptococcaceae_[XI]; g__Filifactor; s__alocis	3.52232	0.68805	0.437711	1.57193	0.115967	0.985929		k__Bacteria; p__Actinobacteria; c__Actinobacteria; o__Actinomycetales; f__Actinomycetaceae; g__Actinomyces; s__sp._oral_taxon_180	1.88995	1.87162	0.451716	4.14336	NA	NA
k__Bacteria; p__Bacteroidetes; c__Bacteroidia; o__Bacteroidales; f__Prevotellaceae; g__Prevotella; s__sp._oral_taxon_475	1.48799	0.753936	0.390136	1.9325	0.0532984	NA		k__Bacteria; p__Fusobacteria; c__Fusobacteriia; o__Fusobacteriales; f__Fusobacteriaceae; g__Fusobacterium; s__simiae	1.38543	-0.381728	0.410352	-0.930246	0.352244	0.970945		k__Bacteria; p__Bacteroidetes; c__Bacteroidetes_[C-1]; o__Bacteroidetes_[O-1]; f__Bacteroidetes_[F-1]; g__Bacteroidetes_[G-3]; s__sp._oral_taxon_280	1.20461	0.202299	0.413426	0.489322	0.624613	0.985929		k__Bacteria; p__Spirochaetes; c__Spirochaetia; o__Spirochaetales; f__Spirochaetaceae; g__Treponema; s__sp._oral_taxon_237	2.7113	1.28649	0.525006	2.45042	NA	NA
k__Bacteria; p__Bacteroidetes; c__Bacteroidia; o__Bacteroidales; f__Prevotellaceae; g__Prevotella; s__maculosa	1.08803	-0.0514011	0.390271	-0.131706	0.895217	NA		k__Bacteria; p__Bacteroidetes; c__Bacteroidia; o__Bacteroidales; f__Prevotellaceae; g__Prevotella; s__baroniae	1.44253	-0.439083	0.410021	-1.07088	0.284224	0.970945		k__Bacteria; p__Bacteroidetes; c__Bacteroidetes_[C-1]; o__Bacteroidetes_[O-1]; f__Bacteroidetes_[F-1]; g__Bacteroidetes_[G-5]; s__sp._oral_taxon_505	1.35265	0.374348	0.410757	0.911361	0.362105	0.985929		k__Bacteria; p__Proteobacteria; c__Epsilonproteobacteria; o__Campylobacterales; f__Campylobacteraceae; g__Campylobacter; s__showae	1.08868	-0.0430088	0.519838	-0.082735	0.934062	NA
k__Bacteria; p__Bacteroidetes; c__Bacteroidia; o__Bacteroidales; f__Prevotellaceae; g__Prevotella; s__sp._oral_taxon_317	1.68265	0.175683	0.355244	0.494542	0.620924	NA		k__Bacteria; p__Proteobacteria; c__Betaproteobacteria; o__Neisseriales; f__Neisseriaceae; g__Kingella; s__sp._oral_taxon_012	1.23666	-0.0728093	0.407821	-0.178532	0.858305	0.970945		k__Bacteria; p__Bacteroidetes; c__Bacteroidia; o__Bacteroidales; f__Bacteroidales_[F-2]; g__Bacteroidales_[G-2]; s__sp._oral_taxon_274	2.22162	0.414758	0.406998	1.01907	0.308171	0.985929		k__Bacteria; p__Fusobacteria; c__Fusobacteriia; o__Fusobacteriales; f__Leptotrichiaceae; g__Leptotrichia; s__multispecies_spp8_2	1.119	-0.0732266	0.518992	-0.141094	0.887796	NA
k__Bacteria; p__Saccharibacteria_(TM7); c__TM7_[C-1]; o__TM7_[O-1]; f__TM7_[F-1]; g__TM7_[G-1]; s__sp._oral_taxon_346	1.47518	-0.296347	0.369439	-0.802154	0.422464	NA		k__Bacteria; p__Actinobacteria; c__Coriobacteriia; o__Coriobacteriales; f__Coriobacteriaceae; g__Atopobium; s__sp._oral_taxon_199	1.11776	0.0798194	0.411977	0.193748	0.846374	0.970945		k__Bacteria; p__Actinobacteria; c__Actinobacteria; o__Actinomycetales; f__Actinomycetaceae; g__Actinomyces; s__sp._oral_taxon_448	1.08873	0.043277	0.417494	0.103659	0.91744	0.985929		k__Bacteria; p__Fusobacteria; c__Fusobacteriia; o__Fusobacteriales; f__Fusobacteriaceae; g__Fusobacterium; s__multispecies_spp9_3	1.11718	-0.073203	0.518982	-0.141051	0.887829	NA
k__Bacteria; p__Actinobacteria; c__Actinobacteria; o__Actinomycetales; f__Actinomycetaceae; g__Actinomyces; s__naeslundii	1.41479	0.0914542	0.366601	0.249465	0.803001	NA		k__Bacteria; p__Fusobacteria; c__Fusobacteriia; o__Fusobacteriales; f__Leptotrichiaceae; g__Leptotrichia; s__trevisanii	1.32769	-0.320286	0.411664	-0.778028	0.436552	0.970945		k__Bacteria; p__Actinobacteria; c__Actinobacteria; o__Actinomycetales; f__Micrococcaceae; g__Rothia; s__mucilaginosa	114.434	-0.423921	0.378488	-1.12004	0.262698	0.985929		k__Bacteria; p__multiphylum; c__multiclass; o__multiorder; f__'Fusobacteriaceae'; g__Fusobacterium; s__multispecies_spp10_5	1.23784	0.291031	0.489957	0.593992	0.552517	NA
k__Bacteria; p__Firmicutes; c__Bacilli; o__Lactobacillales; f__Lactobacillaceae; g__Lactobacillus; s__fermentum	1.02682	-0.0735835	0.396066	-0.185786	0.852613	NA		k__Bacteria; p__Actinobacteria; c__Actinobacteria; o__Actinomycetales; f__Actinomycetaceae; g__Actinomyces; s__viscosus	1.20694	0.107963	0.40352	0.267554	0.789043	0.970945		k__Bacteria; p__Fusobacteria; c__Fusobacteriia; o__Fusobacteriales; f__Fusobacteriaceae; g__Fusobacterium; s__simiae	1.38543	0.0175201	0.39542	0.0443075	0.964659	0.985929		k__Bacteria; p__Fusobacteria; c__Fusobacteriia; o__Fusobacteriales; f__Fusobacteriaceae; g__Fusobacterium; s__multispecies_spp11_4	1.11895	0.419692	0.492828	0.8516	0.394436	NA
k__Bacteria; p__Firmicutes; c__Clostridia; o__Clostridiales; f__Peptoniphilaceae; g__Peptoniphilaceae_[G-1]; s__sp._oral_taxon_113	1.24015	0.28214	0.376229	0.749915	0.453306	NA		k__Bacteria; p__Bacteroidetes; c__Bacteroidia; o__Bacteroidales; f__Prevotellaceae; g__Prevotella; s__marshii	1.08803	-0.0355866	0.418703	-0.0849925	0.932267	0.970945		k__Bacteria; p__Bacteroidetes; c__Bacteroidia; o__Bacteroidales; f__Prevotellaceae; g__Prevotella; s__baroniae	1.44253	0.085121	0.395783	0.21507	0.829713	0.985929		k__Bacteria; p__Proteobacteria; c__Betaproteobacteria; o__Neisseriales; f__Neisseriaceae; g__Neisseria; s__multispecies_spp13_2	1.35557	-0.287106	0.514766	-0.557741	0.577021	NA
k__Bacteria; p__Firmicutes; c__Negativicutes; o__Selenomonadales; f__Veillonellaceae; g__Selenomonas; s__artemidis	1.59708	-0.0621133	0.361826	-0.171666	0.8637	NA		k__Bacteria; p__Firmicutes; c__Clostridia; o__Clostridiales; f__Lachnospiraceae_[XIV]; g__Catonella; s__sp._oral_taxon_451	1.20706	-0.186603	0.414377	-0.45032	0.652479	0.970945		k__Bacteria; p__Proteobacteria; c__Betaproteobacteria; o__Neisseriales; f__Neisseriaceae; g__Kingella; s__sp._oral_taxon_012	1.23666	0.239154	0.412613	0.579609	0.562178	0.985929		k__Bacteria; p__Firmicutes; c__Bacilli; o__Bacillales; f__Gemellaceae; g__Gemella; s__morbillorum	1.14775	-0.102604	0.518189	-0.198004	0.843042	NA
k__Bacteria; p__Firmicutes; c__Negativicutes; o__Selenomonadales; f__Veillonellaceae; g__Dialister; s__pneumosintes	1.26583	0.228265	0.373825	0.61062	0.541451	NA		k__Bacteria; p__Firmicutes; c__Clostridia; o__Clostridiales; f__Peptostreptococcaceae_[XI]; g__Peptostreptococcaceae_[XI][G-7]; s__sp._oral_taxon_922	1.63094	0.339581	0.375147	0.905194	0.365363	0.970945		k__Bacteria; p__Actinobacteria; c__Coriobacteriia; o__Coriobacteriales; f__Coriobacteriaceae; g__Atopobium; s__sp._oral_taxon_199	1.11776	0.0850725	0.416283	0.204362	0.838071	0.985929		k__Bacteria; p__Firmicutes; c__Bacilli; o__Bacillales; f__Staphylococcaceae; g__Gemella; s__multispecies_spp14_2	1.11718	-0.073203	0.518982	-0.141051	0.887829	NA
k__Bacteria; p__Bacteroidetes; c__Bacteroidia; o__Bacteroidales; f__Prevotellaceae; g__Prevotella; s__sp._oral_taxon_396	1.32618	0.127002	0.370709	0.342591	0.731906	NA		k__Bacteria; p__Bacteroidetes; c__Bacteroidia; o__Bacteroidales; f__Prevotellaceae; g__Prevotella; s__pleuritidis	1.2979	0.132698	0.396129	0.334986	0.737636	0.970945		k__Bacteria; p__Fusobacteria; c__Fusobacteriia; o__Fusobacteriales; f__Leptotrichiaceae; g__Leptotrichia; s__trevisanii	1.32769	-0.416272	0.387638	-1.07387	0.282881	0.985929		k__Bacteria; p__Proteobacteria; c__Gammaproteobacteria; o__Pasteurellales; f__Pasteurellaceae; g__Haemophilus; s__parahaemolyticus	4.86516	1.00635	0.540774	1.86094	NA	NA
k__Bacteria; p__Firmicutes; c__Negativicutes; o__Selenomonadales; f__Veillonellaceae; g__Selenomonas; s__multispecies_spp34_3	1.11659	0.146951	0.385776	0.380923	0.70326	NA		k__Bacteria; p__Fusobacteria; c__Fusobacteriia; o__Fusobacteriales; f__Leptotrichiaceae; g__Leptotrichia; s__sp._oral_taxon_463	1.51008	-0.492101	0.411705	-1.19528	0.231979	0.970945		k__Bacteria; p__Actinobacteria; c__Actinobacteria; o__Actinomycetales; f__Actinomycetaceae; g__Actinomyces; s__massiliensis	1.17932	-0.119383	0.404863	-0.294874	0.76809	0.985929		k__Bacteria; p__Bacteroidetes; c__Bacteroidia; o__Bacteroidales; f__Prevotellaceae; g__Prevotella; s__sp._oral_taxon_304	1.97992	1.27113	0.470809	2.69989	NA	NA
k__Bacteria; p__Proteobacteria; c__Betaproteobacteria; o__Neisseriales; f__Neisseriaceae; g__Eikenella; s__corrodens	1.38575	-0.176835	0.370166	-0.477719	0.63285	NA		k__Bacteria; p__Firmicutes; c__Clostridia; o__Clostridiales; f__Peptostreptococcaceae_[XI]; g__Peptostreptococcaceae_[XI][G-6]; s__[Eubacterium]_nodatum	1.23621	-0.0727079	0.407767	-0.178307	0.858482	0.970945		k__Bacteria; p__Actinobacteria; c__Actinobacteria; o__Actinomycetales; f__Actinomycetaceae; g__Actinomyces; s__viscosus	1.20694	0.0596442	0.408311	0.146076	0.883862	0.985929		k__Bacteria; p__Actinobacteria; c__Actinobacteria; o__Corynebacteriales; f__Corynebacteriaceae; g__Corynebacterium; s__durum	1.14878	-0.102616	0.518201	-0.198024	0.843026	NA
k__Bacteria; p__Firmicutes; c__Negativicutes; o__Selenomonadales; f__Veillonellaceae; g__Selenomonas; s__sp._oral_taxon_919	1.2355	-0.0623546	0.378537	-0.164725	0.86916	NA		k__Bacteria; p__Firmicutes; c__Clostridia; o__Clostridiales; f__Lachnospiraceae_[XIV]; g__Lachnoanaerobaculum; s__saburreum	1.11776	-0.0751362	0.417491	-0.179971	0.857176	0.970945		k__Bacteria; p__Bacteroidetes; c__Bacteroidia; o__Bacteroidales; f__Prevotellaceae; g__Prevotella; s__marshii	1.08803	0.0432434	0.417487	0.10358	0.917502	0.985929		k__Bacteria; p__Fusobacteria; c__Fusobacteriia; o__Fusobacteriales; f__Leptotrichiaceae; g__Leptotrichia; s__multispecies_spp16_2	1.23757	0.291326	0.489936	0.594621	0.552097	NA
k__Bacteria; p__Saccharibacteria_(TM7); c__TM7_[C-1]; o__TM7_[O-1]; f__TM7_[F-2]; g__TM7_[G-5]; s__sp._oral_taxon_356	1.35735	0.394928	0.368383	1.07206	0.283694	NA		k__Bacteria; p__Proteobacteria; c__Gammaproteobacteria; o__Pseudomonadales; f__Pseudomonadaceae; g__Pseudomonas; s__veronii	1.08868	0.121123	0.413271	0.293084	0.769458	0.970945		k__Bacteria; p__Bacteroidetes; c__Bacteroidia; o__Bacteroidales; f__Prevotellaceae; g__Prevotella; s__salivae	23.926	0.605128	0.472583	1.28047	0.20038	0.985929		k__Bacteria; p__Proteobacteria; c__Gammaproteobacteria; o__Pasteurellales; f__Pasteurellaceae; g__Haemophilus; s__sp._oral_taxon_036	1.08745	-0.0429943	0.519832	-0.0827081	0.934084	NA
k__Bacteria; p__Firmicutes; c__Bacilli; o__Lactobacillales; f__Streptococcaceae; g__Streptococcus; s__anginosus	1.62368	-0.0987394	0.362571	-0.272332	0.785367	NA		k__Bacteria; p__Actinobacteria; c__Actinobacteria; o__Bifidobacteriales; f__Bifidobacteriaceae; g__Scardovia; s__wiggsiae	1.27519	-0.255646	0.412985	-0.619021	0.535903	0.970945		k__Bacteria; p__Firmicutes; c__Clostridia; o__Clostridiales; f__Lachnospiraceae_[XIV]; g__Catonella; s__sp._oral_taxon_451	1.20706	-0.342455	0.396456	-0.863791	0.387703	0.985929		k__Bacteria; p__Fusobacteria; c__Fusobacteriia; o__Fusobacteriales; f__Fusobacteriaceae; g__Fusobacterium; s__nucleatum_subsp._animalis	1.08779	0.216687	0.506493	0.427818	0.668784	NA
k__Bacteria; p__Firmicutes; c__Clostridia; o__Clostridiales; f__Peptostreptococcaceae_[XI]; g__Peptostreptococcaceae_[XI][G-5]; s__[Eubacterium]_saphenum	1.14785	0.09157	0.383712	0.238642	0.811383	NA		k__Bacteria; p__Proteobacteria; c__Epsilonproteobacteria; o__Campylobacterales; f__Campylobacteraceae; g__Campylobacter; s__sp._oral_taxon_044	1.38842	-0.239325	0.405153	-0.590704	0.554719	0.970945		k__Bacteria; p__Firmicutes; c__Clostridia; o__Clostridiales; f__Peptostreptococcaceae_[XI]; g__Peptostreptococcaceae_[XI][G-7]; s__sp._oral_taxon_922	1.63094	0.0455769	0.386568	0.117902	0.906146	0.985929		k__Bacteria; p__Fusobacteria; c__Fusobacteriia; o__Fusobacteriales; f__Fusobacteriaceae; g__Fusobacterium; s__multispecies_spp18_2	1.14819	-0.102609	0.518192	-0.198014	0.843034	NA
k__Bacteria; p__Actinobacteria; c__Actinobacteria; o__Actinomycetales; f__Actinomycetaceae; g__Actinomyces; s__meyeri	1.11846	0.147139	0.385758	0.381428	0.702886	NA		k__Bacteria; p__Firmicutes; c__Clostridia; o__Clostridiales; f__Peptostreptococcaceae_[XI]; g__Peptostreptococcaceae_[XI][G-4]; s__sp._oral_taxon_369	1.23527	-0.221504	0.413497	-0.535686	0.592176	0.970945		k__Bacteria; p__Bacteroidetes; c__Bacteroidia; o__Bacteroidales; f__Prevotellaceae; g__Prevotella; s__pleuritidis	1.2979	0.0372661	0.40123	0.0928796	0.925999	0.985929		k__Bacteria; p__Bacteroidetes; c__Bacteroidia; o__Bacteroidales; f__Prevotellaceae; g__Prevotella; s__multispecies_spp20_2	1.23843	-0.186171	0.516157	-0.360686	0.718334	NA
k__Bacteria; p__Proteobacteria; c__Gammaproteobacteria; o__Pasteurellales; f__Pasteurellaceae; g__Aggregatibacter; s__actinomycetemcomitans	1.14676	-0.155438	0.386654	-0.402007	0.687679	NA		k__Bacteria; p__Proteobacteria; c__Betaproteobacteria; o__Neisseriales; f__Neisseriaceae; g__Neisseria; s__elongata	7.01837	-0.292713	0.447816	-0.653646	0.51334	0.970945		k__Bacteria; p__Fusobacteria; c__Fusobacteriia; o__Fusobacteriales; f__Leptotrichiaceae; g__Leptotrichia; s__sp._oral_taxon_463	1.51008	-0.504208	0.382152	-1.31939	0.187038	0.985929		k__Bacteria; p__Bacteroidetes; c__Bacteroidia; o__Bacteroidales; f__Prevotellaceae; g__Prevotella; s__multispecies_spp21_4	1.08803	-0.0430013	0.519835	-0.0827211	0.934073	NA
k__Bacteria; p__Fusobacteria; c__Fusobacteriia; o__Fusobacteriales; f__Fusobacteriaceae; g__Fusobacterium; s__multispecies_spp35_3	1.1784	-0.20471	0.384986	-0.531734	0.59491	NA		k__Bacteria; p__Firmicutes; c__Clostridia; o__Clostridiales; f__Veillonellaceae; g__Selenomonas; s__sp._Oral_Taxon_G67	1.08863	-0.035596	0.418707	-0.0850141	0.93225	0.970945		k__Bacteria; p__Firmicutes; c__Clostridia; o__Clostridiales; f__Peptostreptococcaceae_[XI]; g__Peptostreptococcaceae_[XI][G-6]; s__[Eubacterium]_nodatum	1.23621	0.0976705	0.407437	0.239719	0.810548	0.985929		k__Bacteria; p__Spirochaetes; c__Spirochaetia; o__Spirochaetales; f__Spirochaetaceae; g__Treponema; s__socranskii	1.29497	0.438538	0.477311	0.918768	0.358217	NA
k__Bacteria; p__Proteobacteria; c__Betaproteobacteria; o__Neisseriales; f__Neisseriaceae; g__Kingella; s__denitrificans	1.65922	0.218864	0.358932	0.609764	0.542018	NA		k__Bacteria; p__Firmicutes; c__Negativicutes; o__Selenomonadales; f__Veillonellaceae; g__Selenomonas; s__sp._oral_taxon_137	1.50372	-0.493628	0.409842	-1.20443	0.228422	0.970945		k__Bacteria; p__Firmicutes; c__Clostridia; o__Clostridiales; f__Lachnospiraceae_[XIV]; g__Lachnoanaerobaculum; s__saburreum	1.11776	-0.0627891	0.411501	-0.152586	0.878725	0.985929		k__Bacteria; p__Proteobacteria; c__Gammaproteobacteria; o__Pasteurellales; f__Pasteurellaceae; g__Aggregatibacter; s__paraphrophilus	1.20645	0.321922	0.490534	0.656268	0.511651	NA
k__Bacteria; p__Fusobacteria; c__Fusobacteriia; o__Fusobacteriales; f__Leptotrichiaceae; g__Leptotrichia; s__sp._oral_taxon_498	1.59607	-0.15352	0.365998	-0.419456	0.674883	NA		k__Bacteria; p__Firmicutes; c__Negativicutes; o__Selenomonadales; f__Veillonellaceae; g__Dialister; s__invisus	1.56719	-0.0376764	0.387863	-0.0971383	0.922617	0.970945		k__Bacteria; p__Proteobacteria; c__Gammaproteobacteria; o__Pseudomonadales; f__Pseudomonadaceae; g__Pseudomonas; s__veronii	1.08868	0.0432746	0.417493	0.103653	0.917444	0.985929		k__Bacteria; p__Actinobacteria; c__Actinobacteria; o__Actinomycetales; f__Actinomycetaceae; g__Actinomyces; s__johnsonii	1.11718	-0.073203	0.518982	-0.141051	0.887829	NA
k__Bacteria; p__Firmicutes; c__Negativicutes; o__Selenomonadales; f__Veillonellaceae; g__Veillonella; s__sp._oral_taxon_780	1.5377	0.0170017	0.363405	0.0467843	0.962685	NA		k__Bacteria; p__Bacteroidetes; c__Bacteroidia; o__Bacteroidales; f__Prevotellaceae; g__Alloprevotella; s__sp._oral_taxon_912	1.29734	-0.14242	0.406194	-0.350622	0.725872	0.970945		k__Bacteria; p__Proteobacteria; c__Epsilonproteobacteria; o__Campylobacterales; f__Campylobacteraceae; g__Campylobacter; s__sp._oral_taxon_044	1.38842	0.271949	0.405608	0.670471	0.502557	0.985929		k__Bacteria; p__Firmicutes; c__Bacilli; o__Lactobacillales; f__Streptococcaceae; g__Streptococcus; s__multispecies_spp23_15	1.2414	-0.186227	0.516186	-0.360775	0.718268	NA
k__Bacteria; p__Bacteroidetes; c__Bacteroidia; o__Bacteroidales; f__Prevotellaceae; g__Prevotella; s__sp._oral_taxon_300	1.14888	-0.155621	0.386599	-0.402539	0.687288	NA		k__Bacteria; p__Proteobacteria; c__Alphaproteobacteria; o__Sphingomonadales; f__Sphingomonadaceae; g__Novosphingobium; s__subterraneum	1.08863	-0.035596	0.418707	-0.0850141	0.93225	0.970945		k__Bacteria; p__Firmicutes; c__Clostridia; o__Clostridiales; f__Peptostreptococcaceae_[XI]; g__Peptostreptococcaceae_[XI][G-4]; s__sp._oral_taxon_369	1.23527	-0.0387758	0.402934	-0.0962334	0.923335	0.985929		k__Bacteria; p__Bacteroidetes; c__Flavobacteriia; o__Flavobacteriales; f__Flavobacteriaceae; g__Capnocytophaga; s__ochracea	1.18061	-0.131245	0.517488	-0.253619	0.79979	NA
k__Bacteria; p__Saccharibacteria_(TM7); c__TM7_[C-1]; o__TM7_[O-1]; f__TM7_[F-1]; g__TM7_[G-1]; s__sp._oral_taxon_952	1.68434	0.434502	0.355244	1.22311	0.221289	NA		k__Bacteria; p__Bacteroidetes; c__Bacteroidetes_[C-1]; o__Bacteroidetes_[O-1]; f__Bacteroidetes_[F-1]; g__Bacteroidetes_[G-5]; s__sp._oral_taxon_511	1.26871	-0.255527	0.412767	-0.619058	0.535878	0.970945		k__Bacteria; p__Proteobacteria; c__Betaproteobacteria; o__Neisseriales; f__Neisseriaceae; g__Neisseria; s__elongata	7.01837	-0.323532	0.444516	-0.727831	0.466717	0.985929		k__Bacteria; p__Bacteroidetes; c__Bacteroidia; o__Bacteroidales; f__Porphyromonadaceae; g__Porphyromonas; s__multispecies_spp25_2	1.11718	-0.073203	0.518982	-0.141051	0.887829	NA
k__Bacteria; p__Proteobacteria; c__Gammaproteobacteria; o__Pasteurellales; f__Pasteurellaceae; g__Aggregatibacter; s__multispecies_spp36_2	1.38716	-0.177356	0.370317	-0.478929	0.631989	NA		k__Bacteria; p__Proteobacteria; c__Gammaproteobacteria; o__Pasteurellales; f__Pasteurellaceae; g__Haemophilus; s__sputorum	1.50624	-0.494487	0.409288	-1.20816	0.226985	0.970945		k__Bacteria; p__Firmicutes; c__Clostridia; o__Clostridiales; f__Veillonellaceae; g__Selenomonas; s__sp._Oral_Taxon_G67	1.08863	0.0432722	0.417493	0.103648	0.917449	0.985929		k__Bacteria; p__Firmicutes; c__Mollicutes; o__Mycoplasmatales; f__Mycoplasmataceae; g__Mycoplasma; s__orale	1.08803	-0.0430013	0.519835	-0.0827211	0.934073	NA
k__Bacteria; p__Bacteroidetes; c__Flavobacteriia; o__Flavobacteriales; f__Flavobacteriaceae; g__Capnocytophaga; s__sp._oral_taxon_380	1.11776	-0.104485	0.388372	-0.269033	0.787905	NA		k__Bacteria; p__Synergistetes; c__Synergistia; o__Synergistales; f__Synergistaceae; g__Fretibacterium; s__sp._oral_taxon_359	1.44802	-0.299666	0.404097	-0.741569	0.458348	0.970945		k__Bacteria; p__Firmicutes; c__Negativicutes; o__Selenomonadales; f__Veillonellaceae; g__Selenomonas; s__sp._oral_taxon_137	1.50372	-0.402508	0.38022	-1.05862	0.289773	0.985929		k__Bacteria; p__Proteobacteria; c__Gammaproteobacteria; o__Pseudomonadales; f__Moraxellaceae; g__Moraxella; s__sp._Oral_Taxon_B07	1.0581	-0.0119329	0.520737	-0.0229155	0.981718	NA
k__Bacteria; p__Firmicutes; c__Clostridia; o__Clostridiales; f__Clostridiales_[F]; g__Clostridiales_[G]; s__sp._Oral_Taxon_G74	1.17488	0.276581	0.380371	0.727135	0.467143	NA		k__Bacteria; p__Spirochaetes; c__Spirochaetia; o__Spirochaetales; f__Spirochaetaceae; g__Treponema; s__lecithinolyticum	1.17793	-0.150604	0.415325	-0.362618	0.71689	0.970945		k__Bacteria; p__Firmicutes; c__Negativicutes; o__Selenomonadales; f__Veillonellaceae; g__Dialister; s__invisus	1.56719	-0.12417	0.381743	-0.325271	0.744976	0.985929		k__Bacteria; p__Synergistetes; c__Synergistia; o__Synergistales; f__Synergistaceae; g__Fretibacterium; s__sp._oral_taxon_362	1.11752	0.18434	0.505595	0.364601	0.715409	NA
k__Bacteria; p__Firmicutes; c__Clostridia; o__Clostridiales; f__Peptococcaceae; g__Peptococcus; s__sp._oral_taxon_168	1.39091	-0.176869	0.370486	-0.477397	0.633079	NA		k__Bacteria; p__Bacteroidetes; c__Flavobacteriia; o__Flavobacteriales; f__Flavobacteriaceae; g__Capnocytophaga; s__sp._oral_taxon_863	1.83532	-0.355295	0.428048	-0.830035	0.406519	0.970945		k__Bacteria; p__Bacteroidetes; c__Bacteroidia; o__Bacteroidales; f__Prevotellaceae; g__Alloprevotella; s__sp._oral_taxon_912	1.29734	-0.217921	0.393441	-0.553886	0.579657	0.985929		k__Bacteria; p__Synergistetes; c__Synergistia; o__Synergistales; f__Synergistaceae; g__Fretibacterium; s__multispecies_spp26_2	1.11895	0.419692	0.492828	0.8516	0.394436	NA
k__Bacteria; p__Bacteroidetes; c__Bacteroidia; o__Bacteroidales; f__Porphyromonadaceae; g__Porphyromonas; s__sp._oral_taxon_275	1.17663	0.0382662	0.381731	0.100244	0.920151	NA		k__Bacteria; p__Proteobacteria; c__Betaproteobacteria; o__Neisseriales; f__Neisseriaceae; g__Morococcus; s__cerebrosus	1.12037	-0.0751807	0.417514	-0.180067	0.8571	0.970945		k__Bacteria; p__Proteobacteria; c__Alphaproteobacteria; o__Sphingomonadales; f__Sphingomonadaceae; g__Novosphingobium; s__subterraneum	1.08863	-0.106506	0.412787	-0.258018	0.796393	0.985929		k__Bacteria; p__Firmicutes; c__Negativicutes; o__Selenomonadales; f__Veillonellaceae; g__Veillonella; s__multispecies_spp28_3	1.11835	-0.0732183	0.518989	-0.141079	0.887808	NA
k__Bacteria; p__Bacteroidetes; c__Bacteroidia; o__Bacteroidales; f__Porphyromonadaceae; g__Porphyromonas; s__sp._oral_taxon_285	1.63451	-0.471277	0.370404	-1.27233	0.203256	NA		k__Bacteria; p__Bacteroidetes; c__Flavobacteriia; o__Flavobacteriales; f__Flavobacteriaceae; g__Capnocytophaga; s__sp._oral_taxon_324	1.35338	-0.341791	0.4216	-0.8107	0.417538	0.970945		k__Bacteria; p__Bacteroidetes; c__Bacteroidetes_[C-1]; o__Bacteroidetes_[O-1]; f__Bacteroidetes_[F-1]; g__Bacteroidetes_[G-5]; s__sp._oral_taxon_511	1.26871	-0.131022	0.398135	-0.32909	0.742088	0.985929		k__Bacteria; p__Fusobacteria; c__Fusobacteriia; o__Fusobacteriales; f__Leptotrichiaceae; g__Leptotrichia; s__sp._oral_taxon_223	1.32564	-0.26323	0.514647	-0.511476	0.609018	NA
k__Bacteria; p__Firmicutes; c__Clostridia; o__Clostridiales; f__Peptococcaceae; g__Peptococcus; s__sp._oral_taxon_167	1.26793	0.00381456	0.375703	0.0101531	0.991899	NA		k__Bacteria; p__Firmicutes; c__Clostridia; o__Clostridiales; f__Peptostreptococcaceae_[XI]; g__Peptostreptococcaceae_[XI][G-2]; s__sp._oral_taxon_091	1.11846	0.079805	0.411982	0.19371	0.846403	0.970945		k__Bacteria; p__Proteobacteria; c__Gammaproteobacteria; o__Pasteurellales; f__Pasteurellaceae; g__Haemophilus; s__sputorum	1.50624	0.149406	0.394479	0.378742	0.704879	0.985929		k__Bacteria; p__Fusobacteria; c__Fusobacteriia; o__Fusobacteriales; f__Leptotrichiaceae; g__Leptotrichia; s__multispecies_spp31_2	1.30573	-0.233538	0.521512	-0.447811	0.65429	NA
k__Bacteria; p__Actinobacteria; c__Actinobacteria; o__Actinomycetales; f__Actinomycetaceae; g__Actinomyces; s__sp._oral_taxon_178	1.11752	0.0219173	0.386836	0.0566579	0.954818	NA		k__Bacteria; p__Gracilibacteria_(GN02); c__GN02_[C-1]; o__GN02_[O-1]; f__GN02_[F-1]; g__GN02_[G-1]; s__sp._oral_taxon_872	1.17606	-0.150553	0.415332	-0.362489	0.716986	0.970945		k__Bacteria; p__Synergistetes; c__Synergistia; o__Synergistales; f__Synergistaceae; g__Fretibacterium; s__sp._oral_taxon_359	1.44802	-0.262362	0.384929	-0.681585	0.495501	0.985929		k__Bacteria; p__Firmicutes; c__Bacilli; o__Lactobacillales; f__Streptococcaceae; g__Streptococcus; s__thermophilus	1.3019	0.00738684	0.501715	0.0147232	0.988253	NA
k__Bacteria; p__Bacteroidetes; c__Flavobacteriia; o__Flavobacteriales; f__Flavobacteriaceae; g__Capnocytophaga; s__sp._oral_taxon_336	1.32559	0.0193548	0.371836	0.0520519	0.958487	NA		k__Bacteria; p__Saccharibacteria_(TM7); c__TM7_[C-1]; o__TM7_[O-1]; f__TM7_[F-1]; g__TM7_[G-1]; s__sp._oral_taxon_869	1.17722	-0.150589	0.415319	-0.362585	0.716915	0.970945		k__Bacteria; p__Spirochaetes; c__Spirochaetia; o__Spirochaetales; f__Spirochaetaceae; g__Treponema; s__lecithinolyticum	1.17793	0.020277	0.409229	0.0495493	0.960482	0.985929		k__Bacteria; p__Bacteroidetes; c__Bacteroidia; o__Bacteroidales; f__Prevotellaceae; g__Prevotella; s__maculosa	1.08803	-0.0430013	0.519835	-0.0827211	0.934073	NA
k__Bacteria; p__Fusobacteria; c__Fusobacteria; o__Fusobacteriales; f__Leptotrichiaceae; g__Leptotrichia; s__sp._Oral_Taxon_B57	1.35313	0.393701	0.368844	1.06739	0.285795	NA		k__Bacteria; p__Firmicutes; c__Negativicutes; o__Selenomonadales; f__Veillonellaceae; g__Centipeda; s__periodontii	1.32466	-0.175584	0.405595	-0.432904	0.665085	0.970945		k__Bacteria; p__Bacteroidetes; c__Flavobacteriia; o__Flavobacteriales; f__Flavobacteriaceae; g__Capnocytophaga; s__sp._oral_taxon_863	1.35971	0.37577	0.40986	0.916825	0.359234	0.985929		k__Bacteria; p__Firmicutes; c__Bacilli; o__Lactobacillales; f__Lactobacillaceae; g__Lactobacillus; s__fermentum	1.02682	0.0200442	0.521681	0.0384222	0.969351	NA
k__Bacteria; p__Proteobacteria; c__Betaproteobacteria; o__Neisseriales; f__Neisseriaceae; g__Kingella; s__sp._oral_taxon_932	1.14749	-0.155494	0.386663	-0.402144	0.687578	NA		k__Bacteria; p__Actinobacteria; c__Actinobacteria; o__Actinomycetales; f__Actinomycetaceae; g__Actinomyces; s__oris	1.11811	-0.0751422	0.417494	-0.179984	0.857165	0.970945		k__Bacteria; p__Proteobacteria; c__Betaproteobacteria; o__Neisseriales; f__Neisseriaceae; g__Morococcus; s__cerebrosus	1.12037	-0.206194	0.407323	-0.506216	0.612705	0.985929		k__Bacteria; p__Firmicutes; c__Clostridia; o__Clostridiales; f__Peptoniphilaceae; g__Peptoniphilaceae_[G-1]; s__sp._oral_taxon_113	1.24015	-0.186152	0.516258	-0.36058	0.718414	NA
k__Bacteria; p__Firmicutes; c__Clostridia; o__Clostridiales; f__Lachnospiraceae_[XIV]; g__Lachnospiraceae_[G-8]; s__sp._oral_taxon_500	1.44703	0.146734	0.363674	0.403476	0.686598	NA		k__Bacteria; p__Spirochaetes; c__Spirochaetia; o__Spirochaetales; f__Spirochaetaceae; g__Treponema; s__sp._oral_taxon_236	1.08863	0.121121	0.413271	0.293079	0.769462	0.970945		k__Bacteria; p__Firmicutes; c__Clostridia; o__Clostridiales; f__Peptostreptococcaceae_[XI]; g__Peptostreptococcaceae_[XI][G-2]; s__sp._oral_taxon_091	1.11846	0.0851082	0.416291	0.204444	0.838007	0.985929		k__Bacteria; p__Firmicutes; c__Negativicutes; o__Selenomonadales; f__Veillonellaceae; g__Dialister; s__pneumosintes	1.26583	0.0352125	0.502151	0.0701232	0.944096	NA
k__Bacteria; p__Firmicutes; c__Negativicutes; o__Selenomonadales; f__Veillonellaceae; g__Mitsuokella; s__sp._oral_taxon_131	1.08803	-0.0514011	0.390271	-0.131706	0.895217	NA		k__Bacteria; p__Bacteroidetes; c__Bacteroidia; o__Bacteroidales; f__Prevotellaceae; g__Prevotella; s__histicola	88.6828	-0.232451	0.484178	-0.480093	0.631161	0.970945		k__Bacteria; p__Gracilibacteria_(GN02); c__GN02_[C-1]; o__GN02_[O-1]; f__GN02_[F-1]; g__GN02_[G-1]; s__sp._oral_taxon_872	1.17606	0.164549	0.414241	0.39723	0.691198	0.985929		k__Bacteria; p__Bacteroidetes; c__Bacteroidia; o__Bacteroidales; f__Prevotellaceae; g__Prevotella; s__sp._oral_taxon_396	1.32618	0.203314	0.48871	0.416021	0.677395	NA
k__Bacteria; p__Bacteroidetes; c__Bacteroidia; o__Bacteroidales; f__Prevotellaceae; g__Prevotella; s__micans	1.29405	0.0667418	0.373158	0.178857	0.85805	NA		k__Bacteria; p__Firmicutes; c__Clostridia; o__Clostridiales; f__Peptostreptococcaceae_[XI]; g__Peptostreptococcaceae_[XI][G-9]; s__[Eubacterium]_brachy	1.41305	-0.270003	0.40428	-0.667863	0.504221	0.970945		k__Bacteria; p__Saccharibacteria_(TM7); c__TM7_[C-1]; o__TM7_[O-1]; f__TM7_[F-1]; g__TM7_[G-1]; s__sp._oral_taxon_869	1.17722	0.164666	0.414132	0.397616	0.690913	0.985929		k__Bacteria; p__Firmicutes; c__Negativicutes; o__Selenomonadales; f__Veillonellaceae; g__Selenomonas; s__multispecies_spp34_3	1.11659	-0.0731942	0.518982	-0.141034	0.887843	NA
k__Bacteria; p__Firmicutes; c__Negativicutes; o__Selenomonadales; f__Veillonellaceae; g__Selenomonas; s__dianae	1.3834	0.137357	0.367755	0.373501	0.708775	NA		k__Bacteria; p__Proteobacteria; c__Betaproteobacteria; o__Neisseriales; f__Neisseriaceae; g__Neisseria; s__sp._oral_taxon_020	1.59734	-0.435445	0.405422	-1.07405	0.2828	0.970945		k__Bacteria; p__Firmicutes; c__Negativicutes; o__Selenomonadales; f__Veillonellaceae; g__Centipeda; s__periodontii	1.32466	0.073441	0.400785	0.183243	0.854607	0.985929		k__Bacteria; p__Firmicutes; c__Negativicutes; o__Selenomonadales; f__Veillonellaceae; g__Selenomonas; s__sp._oral_taxon_919	1.2355	-0.18611	0.516141	-0.360581	0.718413	NA
k__Bacteria; p__Bacteroidetes; c__Bacteroidetes_[C-1]; o__Bacteroidetes_[O-1]; f__Bacteroidetes_[F-1]; g__Bacteroidetes_[G-3]; s__sp._oral_taxon_280	1.20461	0.337151	0.377905	0.892158	0.372308	NA		k__Bacteria; p__Bacteroidetes; c__Flavobacteriia; o__Flavobacteriales; f__Flavobacteriaceae; g__Bergeyella; s__sp._oral_taxon_907	1.11776	0.0798194	0.411977	0.193748	0.846374	0.970945		k__Bacteria; p__Actinobacteria; c__Actinobacteria; o__Actinomycetales; f__Actinomycetaceae; g__Actinomyces; s__oris	1.11811	-0.062722	0.411507	-0.152421	0.878855	0.985929		k__Bacteria; p__Firmicutes; c__Clostridia; o__Clostridiales; f__Peptostreptococcaceae_[XI]; g__Peptostreptococcaceae_[XI][G-5]; s__[Eubacterium]_saphenum	1.14785	0.152955	0.504772	0.303019	0.761876	NA
k__Bacteria; p__Bacteroidetes; c__Bacteroidetes_[C-1]; o__Bacteroidetes_[O-1]; f__Bacteroidetes_[F-1]; g__Bacteroidetes_[G-5]; s__sp._oral_taxon_505	1.35265	0.603357	0.369229	1.6341	0.102237	NA		k__Bacteria; p__Bacteroidetes; c__Flavobacteriia; o__Flavobacteriales; f__Flavobacteriaceae; g__Capnocytophaga; s__sp._oral_taxon_326	2.07426	-0.140971	0.415806	-0.33903	0.734587	0.970945		k__Bacteria; p__Spirochaetes; c__Spirochaetia; o__Spirochaetales; f__Spirochaetaceae; g__Treponema; s__sp._oral_taxon_236	1.08863	0.0432722	0.417493	0.103648	0.917449	0.985929		k__Bacteria; p__Actinobacteria; c__Actinobacteria; o__Actinomycetales; f__Actinomycetaceae; g__Actinomyces; s__meyeri	1.11846	-0.0732196	0.518989	-0.141081	0.887806	NA
k__Bacteria; p__Actinobacteria; c__Actinobacteria; o__Actinomycetales; f__Actinomycetaceae; g__Actinomyces; s__sp._oral_taxon_448	1.08873	0.0773497	0.388928	0.198879	0.842357	NA		k__Bacteria; p__Bacteroidetes; c__Flavobacteriia; o__Flavobacteriales; f__Flavobacteriaceae; g__Capnocytophaga; s__haemolytica	1.11895	-0.0751571	0.417499	-0.180017	0.857139	0.970945		k__Bacteria; p__Bacteroidetes; c__Bacteroidia; o__Bacteroidales; f__Prevotellaceae; g__Prevotella; s__histicola	88.6828	0.233378	0.49246	0.473903	0.635569	0.985929		k__Bacteria; p__Proteobacteria; c__Gammaproteobacteria; o__Pasteurellales; f__Pasteurellaceae; g__Aggregatibacter; s__actinomycetemcomitans	1.14676	0.600956	0.480104	1.25172	0.210672	NA
k__Bacteria; p__Fusobacteria; c__Fusobacteriia; o__Fusobacteriales; f__Fusobacteriaceae; g__Fusobacterium; s__simiae	1.38543	0.0332091	0.368048	0.0902302	0.928104	NA		k__Bacteria; p__Synergistetes; c__Synergistia; o__Synergistales; f__Synergistaceae; g__Fretibacterium; s__sp._oral_taxon_358	1.11718	-0.0751255	0.417487	-0.179947	0.857194	0.970945		k__Bacteria; p__Firmicutes; c__Clostridia; o__Clostridiales; f__Peptostreptococcaceae_[XI]; g__Peptostreptococcaceae_[XI][G-9]; s__[Eubacterium]_brachy	1.41305	-0.068833	0.391609	-0.17577	0.860475	0.985929		k__Bacteria; p__Fusobacteria; c__Fusobacteriia; o__Fusobacteriales; f__Fusobacteriaceae; g__Fusobacterium; s__multispecies_spp35_3	1.1784	0.353822	0.491223	0.720287	0.471348	NA
k__Bacteria; p__Bacteroidetes; c__Bacteroidia; o__Bacteroidales; f__Prevotellaceae; g__Prevotella; s__baroniae	1.44253	0.344202	0.364351	0.9447	0.344812	NA		k__Bacteria; p__Firmicutes; c__Clostridia; o__Clostridiales; f__Veillonellaceae; g__Selenomonas; s__sp._Oral_Taxon_G55	1.14676	-0.11343	0.416376	-0.272421	0.785298	0.970945		k__Bacteria; p__Proteobacteria; c__Betaproteobacteria; o__Neisseriales; f__Neisseriaceae; g__Neisseria; s__sp._oral_taxon_020	1.59734	0.475864	0.405676	1.17301	0.24079	0.985929		k__Bacteria; p__Bacteroidetes; c__Bacteroidia; o__Bacteroidales; f__Prevotellaceae; g__Prevotella; s__sp._oral_taxon_300	1.14888	-0.102618	0.518201	-0.198026	0.843024	NA
k__Bacteria; p__Proteobacteria; c__Betaproteobacteria; o__Neisseriales; f__Neisseriaceae; g__Kingella; s__sp._oral_taxon_012	1.23666	0.281825	0.375911	0.74971	0.453429	NA		k__Bacteria; p__Actinobacteria; c__Actinobacteria; o__Propionibacteriales; f__Propionibacteriaceae; g__Propionibacterium; s__sp._oral_taxon_194	1.11659	-0.0751141	0.417488	-0.179919	0.857216	0.970945		k__Bacteria; p__Bacteroidetes; c__Flavobacteriia; o__Flavobacteriales; f__Flavobacteriaceae; g__Bergeyella; s__sp._oral_taxon_907	1.11776	-0.0627891	0.411501	-0.152586	0.878725	0.985929		k__Bacteria; p__Bacteroidetes; c__Flavobacteriia; o__Flavobacteriales; f__Flavobacteriaceae; g__Capnocytophaga; s__sp._oral_taxon_380	1.11776	-0.0732097	0.518989	-0.141062	0.887821	NA
k__Bacteria; p__Actinobacteria; c__Coriobacteriia; o__Coriobacteriales; f__Coriobacteriaceae; g__Atopobium; s__sp._oral_taxon_199	1.11776	0.0218991	0.386839	0.0566104	0.954856	NA		k__Bacteria; p__Spirochaetes; c__Spirochaetia; o__Spirochaetales; f__Spirochaetaceae; g__Treponema; s__amylovorum	1.26639	-0.255264	0.413053	-0.617992	0.53658	0.970945		k__Bacteria; p__Bacteroidetes; c__Flavobacteriia; o__Flavobacteriales; f__Flavobacteriaceae; g__Capnocytophaga; s__sp._oral_taxon_326	1.53919	0.552233	0.408573	1.35161	0.176499	0.985929		k__Bacteria; p__Firmicutes; c__Clostridia; o__Clostridiales; f__Clostridiales_[F]; g__Clostridiales_[G]; s__sp._Oral_Taxon_G74	1.17488	-0.131145	0.517465	-0.253437	0.79993	NA
k__Bacteria; p__Fusobacteria; c__Fusobacteriia; o__Fusobacteriales; f__Leptotrichiaceae; g__Leptotrichia; s__trevisanii	1.32769	-0.424815	0.379337	-1.11989	0.262761	NA		k__Bacteria; p__Bacteroidetes; c__Bacteroidia; o__Bacteroidales; f__Prevotellaceae; g__Prevotella; s__multispecies_spp37_3	1.23855	0.0701721	0.402554	0.174317	0.861616	0.970945		k__Bacteria; p__Bacteroidetes; c__Flavobacteriia; o__Flavobacteriales; f__Flavobacteriaceae; g__Capnocytophaga; s__haemolytica	1.11895	-0.0628355	0.411512	-0.152694	0.878639	0.985929		k__Bacteria; p__Bacteroidetes; c__Bacteroidia; o__Bacteroidales; f__Porphyromonadaceae; g__Porphyromonas; s__sp._oral_taxon_275	1.17663	-0.131193	0.517437	-0.253543	0.799848	NA
k__Bacteria; p__Actinobacteria; c__Actinobacteria; o__Actinomycetales; f__Actinomycetaceae; g__Actinomyces; s__massiliensis	1.17932	-0.0822674	0.383136	-0.214721	0.829985	NA		k__Bacteria; p__Bacteroidetes; c__Flavobacteriia; o__Flavobacteriales; f__Flavobacteriaceae; g__Capnocytophaga; s__sputigena	5.40956	0.386696	0.4155	0.930676	0.352021	0.970945		k__Bacteria; p__Synergistetes; c__Synergistia; o__Synergistales; f__Synergistaceae; g__Fretibacterium; s__sp._oral_taxon_358	1.11718	0.0850414	0.416277	0.20429	0.838127	0.985929		k__Bacteria; p__Firmicutes; c__Clostridia; o__Clostridiales; f__Peptococcaceae; g__Peptococcus; s__sp._oral_taxon_167	1.26793	0.662414	0.466819	1.41899	0.155901	NA
k__Bacteria; p__Actinobacteria; c__Actinobacteria; o__Actinomycetales; f__Actinomycetaceae; g__Actinomyces; s__viscosus	1.20694	-0.0128945	0.380062	-0.0339273	0.972935	NA		k__Bacteria; p__Synergistetes; c__Synergistia; o__Synergistales; f__Synergistaceae; g__Fretibacterium; s__sp._oral_taxon_360	1.38707	-0.103161	0.399427	-0.258272	0.796197	0.970945		k__Bacteria; p__Firmicutes; c__Clostridia; o__Clostridiales; f__Veillonellaceae; g__Selenomonas; s__sp._Oral_Taxon_G55	1.14676	-0.298936	0.40233	-0.743013	0.457474	0.985929		k__Bacteria; p__Actinobacteria; c__Actinobacteria; o__Actinomycetales; f__Actinomycetaceae; g__Actinomyces; s__sp._oral_taxon_178	1.11752	0.18434	0.505595	0.364601	0.715409	NA
k__Bacteria; p__Bacteroidetes; c__Bacteroidia; o__Bacteroidales; f__Prevotellaceae; g__Prevotella; s__marshii	1.08803	0.077289	0.388922	0.198726	0.842477	NA		k__Bacteria; p__Actinobacteria; c__Actinobacteria; o__Corynebacteriales; f__Corynebacteriaceae; g__Corynebacterium; s__accolens	1.08803	-0.0355866	0.418703	-0.0849925	0.932267	0.970945		k__Bacteria; p__Actinobacteria; c__Actinobacteria; o__Propionibacteriales; f__Propionibacteriaceae; g__Propionibacterium; s__sp._oral_taxon_194	1.11659	0.0850041	0.416301	0.204189	0.838206	0.985929		k__Bacteria; p__Bacteroidetes; c__Flavobacteriia; o__Flavobacteriales; f__Flavobacteriaceae; g__Capnocytophaga; s__sp._oral_taxon_336	1.32559	0.774929	0.456599	1.69717	0.0896637	NA
k__Bacteria; p__Firmicutes; c__Clostridia; o__Clostridiales; f__Lachnospiraceae_[XIV]; g__Catonella; s__sp._oral_taxon_451	1.20706	-0.131777	0.381567	-0.345356	0.729826	NA		k__Bacteria; p__Bacteroidetes; c__Bacteroidia; o__Bacteroidales; f__Prevotellaceae; g__Prevotella; s__sp._oral_taxon_526	1.32527	-0.320244	0.411561	-0.778121	0.436498	0.970945		k__Bacteria; p__Spirochaetes; c__Spirochaetia; o__Spirochaetales; f__Spirochaetaceae; g__Treponema; s__amylovorum	1.26639	0.274143	0.412839	0.664045	0.506661	0.985929		k__Bacteria; p__Fusobacteria; c__Fusobacteria; o__Fusobacteriales; f__Leptotrichiaceae; g__Leptotrichia; s__sp._Oral_Taxon_B57	1.35313	-0.0452983	0.501321	-0.0903579	0.928003	NA
k__Bacteria; p__Firmicutes; c__Clostridia; o__Clostridiales; f__Peptostreptococcaceae_[XI]; g__Peptostreptococcaceae_[XI][G-7]; s__sp._oral_taxon_922	1.63094	0.349033	0.356413	0.979292	0.327436	NA		k__Bacteria; p__Firmicutes; c__Negativicutes; o__Selenomonadales; f__Veillonellaceae; g__Selenomonas; s__sp._oral_taxon_146	1.1469	-0.113436	0.416365	-0.272444	0.785281	0.970945		k__Bacteria; p__Bacteroidetes; c__Bacteroidia; o__Bacteroidales; f__Prevotellaceae; g__Prevotella; s__multispecies_spp37_3	1.23855	0.0978668	0.407357	0.240248	0.810138	0.985929		k__Bacteria; p__Proteobacteria; c__Betaproteobacteria; o__Neisseriales; f__Neisseriaceae; g__Kingella; s__sp._oral_taxon_932	1.14749	-0.102594	0.518203	-0.19798	0.84306	NA
k__Bacteria; p__Bacteroidetes; c__Bacteroidia; o__Bacteroidales; f__Prevotellaceae; g__Prevotella; s__pleuritidis	1.2979	-0.0438189	0.374056	-0.117145	0.906745	NA		k__Bacteria; p__Bacteroidetes; c__Bacteroidia; o__Bacteroidales; f__Prevotellaceae; g__Prevotella; s__oralis	1.08803	-0.0355866	0.418703	-0.0849925	0.932267	0.970945		k__Bacteria; p__Synergistetes; c__Synergistia; o__Synergistales; f__Synergistaceae; g__Fretibacterium; s__sp._oral_taxon_360	1.38707	-0.222357	0.388823	-0.571873	0.567408	0.985929		k__Bacteria; p__Firmicutes; c__Negativicutes; o__Selenomonadales; f__Veillonellaceae; g__Mitsuokella; s__sp._oral_taxon_131	1.08803	-0.0430013	0.519835	-0.0827211	0.934073	NA
k__Bacteria; p__Fusobacteria; c__Fusobacteriia; o__Fusobacteriales; f__Leptotrichiaceae; g__Leptotrichia; s__sp._oral_taxon_463	1.51008	-0.43385	0.374286	-1.15914	0.246399	NA		k__Bacteria; p__Firmicutes; c__Clostridia; o__Clostridiales; f__Lachnospiraceae_[XIV]; g__Johnsonella; s__ignava	1.11779	-0.0751365	0.417491	-0.179971	0.857175	0.970945		k__Bacteria; p__Actinobacteria; c__Actinobacteria; o__Corynebacteriales; f__Corynebacteriaceae; g__Corynebacterium; s__accolens	1.08803	0.0432434	0.417487	0.10358	0.917502	0.985929		k__Bacteria; p__Bacteroidetes; c__Bacteroidia; o__Bacteroidales; f__Prevotellaceae; g__Prevotella; s__micans	1.29405	-0.23817	0.515063	-0.462409	0.643788	NA
k__Bacteria; p__Firmicutes; c__Clostridia; o__Clostridiales; f__Peptostreptococcaceae_[XI]; g__Peptostreptococcaceae_[XI][G-6]; s__[Eubacterium]_nodatum	1.23621	0.281721	0.375713	0.749831	0.453356	NA		k__Bacteria; p__Firmicutes; c__Bacilli; o__Lactobacillales; f__Lactobacillaceae; g__Lactobacillus; s__delbrueckii	1.08745	-0.0355772	0.4187	-0.0849706	0.932285	0.970945		k__Bacteria; p__Bacteroidetes; c__Bacteroidia; o__Bacteroidales; f__Prevotellaceae; g__Prevotella; s__sp._oral_taxon_526	1.32527	0.342459	0.410857	0.833522	0.40455	0.985929		k__Bacteria; p__Firmicutes; c__Negativicutes; o__Selenomonadales; f__Veillonellaceae; g__Selenomonas; s__dianae	1.3834	0.349566	0.477008	0.732829	0.463662	NA
k__Bacteria; p__Firmicutes; c__Clostridia; o__Clostridiales; f__Lachnospiraceae_[XIV]; g__Lachnoanaerobaculum; s__saburreum	1.11776	0.0218991	0.386839	0.0566104	0.954856	NA		k__Bacteria; p__Bacteroidetes; c__Bacteroidia; o__Bacteroidales; f__Prevotellaceae; g__Prevotella; s__sp._oral_taxon_472	1.32774	-0.0369105	0.400351	-0.0921954	0.926543	0.970945		k__Bacteria; p__Firmicutes; c__Negativicutes; o__Selenomonadales; f__Veillonellaceae; g__Selenomonas; s__sp._oral_taxon_146	1.1469	-0.161948	0.406035	-0.398853	0.690002	0.985929		k__Bacteria; p__Bacteroidetes; c__Bacteroidetes_[C-1]; o__Bacteroidetes_[O-1]; f__Bacteroidetes_[F-1]; g__Bacteroidetes_[G-3]; s__sp._oral_taxon_280	1.20461	-0.158976	0.516781	-0.307628	0.758366	NA
k__Bacteria; p__Proteobacteria; c__Gammaproteobacteria; o__Pseudomonadales; f__Pseudomonadaceae; g__Pseudomonas; s__veronii	1.08868	0.0773453	0.388928	0.198868	0.842366	NA		k__Bacteria; p__Actinobacteria; c__Actinobacteria; o__Bifidobacteriales; f__Bifidobacteriaceae; g__Bifidobacterium; s__dentium	1.11718	-0.0751255	0.417487	-0.179947	0.857194	0.970945		k__Bacteria; p__Bacteroidetes; c__Bacteroidia; o__Bacteroidales; f__Prevotellaceae; g__Prevotella; s__oralis	1.08803	0.0432434	0.417487	0.10358	0.917502	0.985929		k__Bacteria; p__Bacteroidetes; c__Bacteroidetes_[C-1]; o__Bacteroidetes_[O-1]; f__Bacteroidetes_[F-1]; g__Bacteroidetes_[G-5]; s__sp._oral_taxon_505	1.35265	-0.287285	0.514464	-0.558416	0.57656	NA
k__Bacteria; p__Actinobacteria; c__Actinobacteria; o__Bifidobacteriales; f__Bifidobacteriaceae; g__Scardovia; s__wiggsiae	1.27519	0.229469	0.374591	0.612586	0.54015	NA		k__Bacteria; p__Firmicutes; c__Clostridia; o__Clostridiales; f__Veillonellaceae; g__Selenomonas; s__sp._Oral_Taxon_H63	1.11776	-0.0751353	0.417496	-0.179967	0.857179	0.970945		k__Bacteria; p__Firmicutes; c__Clostridia; o__Clostridiales; f__Lachnospiraceae_[XIV]; g__Johnsonella; s__ignava	1.11779	-0.0627404	0.411503	-0.152466	0.878819	0.985929		k__Bacteria; p__Actinobacteria; c__Actinobacteria; o__Actinomycetales; f__Actinomycetaceae; g__Actinomyces; s__sp._oral_taxon_448	1.08873	-0.0430094	0.519838	-0.082736	0.934061	NA
k__Bacteria; p__Proteobacteria; c__Epsilonproteobacteria; o__Campylobacterales; f__Campylobacteraceae; g__Campylobacter; s__sp._oral_taxon_044	1.38842	-0.071562	0.370744	-0.193022	0.846941	NA		k__Bacteria; p__Saccharibacteria_(TM7); c__TM7_[C-1]; o__TM7_[O-1]; f__TM7_[F-1]; g__TM7_[G-1]; s__sp._oral_taxon_488	1.17722	-0.150586	0.415327	-0.362571	0.716925	0.970945		k__Bacteria; p__Firmicutes; c__Bacilli; o__Lactobacillales; f__Lactobacillaceae; g__Lactobacillus; s__delbrueckii	1.08745	0.0432142	0.417481	0.103512	0.917557	0.985929		k__Bacteria; p__Proteobacteria; c__Betaproteobacteria; o__Neisseriales; f__Neisseriaceae; g__Kingella; s__sp._oral_taxon_012	1.23666	-0.186118	0.516175	-0.360571	0.71842	NA
k__Bacteria; p__Firmicutes; c__Clostridia; o__Clostridiales; f__Peptostreptococcaceae_[XI]; g__Peptostreptococcaceae_[XI][G-4]; s__sp._oral_taxon_369	1.23527	0.167699	0.376284	0.44567	0.655835	NA		k__Plantae; p__Angiosperms; c__Magnoliids; o__Laurales; f__Calycanthaceae; g__Calycanthus; s__floridus_Oral_Taxon_D07	1.15043	-0.113505	0.416393	-0.272592	0.785167	0.970945		k__Bacteria; p__Bacteroidetes; c__Bacteroidia; o__Bacteroidales; f__Prevotellaceae; g__Prevotella; s__sp._oral_taxon_472	1.32774	-0.0541434	0.396745	-0.136469	0.89145	0.985929		k__Bacteria; p__Actinobacteria; c__Coriobacteriia; o__Coriobacteriales; f__Coriobacteriaceae; g__Atopobium; s__sp._oral_taxon_199	1.11776	0.184368	0.505596	0.364655	0.715369	NA
k__Bacteria; p__Firmicutes; c__Clostridia; o__Clostridiales; f__Veillonellaceae; g__Selenomonas; s__sp._Oral_Taxon_G67	1.08863	0.0773409	0.388927	0.198857	0.842375	NA		k__Bacteria; p__Firmicutes; c__Negativicutes; o__Selenomonadales; f__Veillonellaceae; g__Veillonellaceae_[G-1]; s__sp._oral_taxon_145	1.11659	-0.0751141	0.417488	-0.179919	0.857216	0.970945		k__Bacteria; p__Firmicutes; c__Bacilli; o__Bacillales; f__Gemellaceae; g__Gemella; s__sanguinis	8.83027	0.0173792	0.405912	0.0428151	0.965849	0.985929		k__Bacteria; p__Fusobacteria; c__Fusobacteriia; o__Fusobacteriales; f__Leptotrichiaceae; g__Leptotrichia; s__trevisanii	1.32769	-0.0193372	0.501601	-0.0385511	0.969248	NA
k__Bacteria; p__Firmicutes; c__Negativicutes; o__Selenomonadales; f__Veillonellaceae; g__Selenomonas; s__sp._oral_taxon_137	1.50372	0.0588653	0.36394	0.161745	0.871507	NA		k__Bacteria; p__Proteobacteria; c__Alphaproteobacteria; o__Sphingomonadales; f__Sphingomonadaceae; g__Zymomonas; s__mobilis	1.08803	0.121094	0.413268	0.293015	0.769511	0.970945		k__Bacteria; p__Actinobacteria; c__Actinobacteria; o__Bifidobacteriales; f__Bifidobacteriaceae; g__Bifidobacterium; s__dentium	1.11718	-0.0628232	0.411494	-0.152671	0.878658	0.985929		k__Bacteria; p__Actinobacteria; c__Actinobacteria; o__Actinomycetales; f__Actinomycetaceae; g__Actinomyces; s__massiliensis	1.17932	0.122207	0.504024	0.242462	0.808422	NA
k__Bacteria; p__Firmicutes; c__Negativicutes; o__Selenomonadales; f__Veillonellaceae; g__Dialister; s__invisus	1.56719	-0.0231045	0.359225	-0.0643177	0.948717	NA		k__Bacteria; p__Firmicutes; c__Negativicutes; o__Selenomonadales; f__Veillonellaceae; g__Anaeroglobus; s__geminatus	1.26977	-0.108093	0.406929	-0.265631	0.790523	0.970945		k__Bacteria; p__Firmicutes; c__Clostridia; o__Clostridiales; f__Veillonellaceae; g__Selenomonas; s__sp._Oral_Taxon_H63	1.11776	0.0850666	0.416314	0.204333	0.838094	0.985929		k__Bacteria; p__Actinobacteria; c__Actinobacteria; o__Actinomycetales; f__Actinomycetaceae; g__Actinomyces; s__viscosus	1.20694	-0.159037	0.516765	-0.307755	0.758269	NA
k__Bacteria; p__Bacteroidetes; c__Bacteroidia; o__Bacteroidales; f__Prevotellaceae; g__Alloprevotella; s__sp._oral_taxon_912	1.29734	-0.156011	0.375533	-0.415439	0.67782	NA		k__Bacteria; p__Proteobacteria; c__Betaproteobacteria; o__Neisseriales; f__Neisseriaceae; g__Kingella; s__kingae	1.08803	-0.0355866	0.418703	-0.0849925	0.932267	0.970945		k__Bacteria; p__Saccharibacteria_(TM7); c__TM7_[C-1]; o__TM7_[O-1]; f__TM7_[F-1]; g__TM7_[G-1]; s__sp._oral_taxon_488	1.17722	0.16465	0.414174	0.397539	0.69097	0.985929		k__Bacteria; p__Bacteroidetes; c__Bacteroidia; o__Bacteroidales; f__Prevotellaceae; g__Prevotella; s__marshii	1.08803	-0.0430013	0.519835	-0.0827211	0.934073	NA
k__Bacteria; p__Proteobacteria; c__Alphaproteobacteria; o__Sphingomonadales; f__Sphingomonadaceae; g__Novosphingobium; s__subterraneum	1.08863	-0.0514399	0.390276	-0.131804	0.895139	NA		k__Bacteria; p__Spirochaetes; c__Spirochaetia; o__Spirochaetales; f__Spirochaetaceae; g__Treponema; s__maltophilum	1.08863	-0.035596	0.418707	-0.0850141	0.93225	0.970945		k__Plantae; p__Angiosperms; c__Magnoliids; o__Laurales; f__Calycanthaceae; g__Calycanthus; s__floridus_Oral_Taxon_D07	1.15043	-0.16197	0.406076	-0.398865	0.689993	0.985929		k__Bacteria; p__Firmicutes; c__Clostridia; o__Clostridiales; f__Lachnospiraceae_[XIV]; g__Catonella; s__sp._oral_taxon_451	1.20706	0.729762	0.467766	1.5601	0.118736	NA
k__Bacteria; p__Bacteroidetes; c__Bacteroidetes_[C-1]; o__Bacteroidetes_[O-1]; f__Bacteroidetes_[F-1]; g__Bacteroidetes_[G-5]; s__sp._oral_taxon_511	1.26871	-0.109938	0.37709	-0.291544	0.770636	NA		k__Bacteria; p__Firmicutes; c__Clostridia; o__Clostridiales; f__Lachnospiraceae_[XIVa]; g__Lachnospiraceae_[G]; s__sp._Oral_Taxon_B32	1.38649	-0.10015	0.411789	-0.243206	0.807846	0.970945		k__Bacteria; p__Firmicutes; c__Negativicutes; o__Selenomonadales; f__Veillonellaceae; g__Veillonellaceae_[G-1]; s__sp._oral_taxon_145	1.11659	0.0850041	0.416301	0.204189	0.838206	0.985929		k__Bacteria; p__Bacteroidetes; c__Bacteroidia; o__Bacteroidales; f__Prevotellaceae; g__Prevotella; s__pleuritidis	1.2979	0.00775548	0.501664	0.0154595	0.987666	NA
k__Bacteria; p__Proteobacteria; c__Gammaproteobacteria; o__Pasteurellales; f__Pasteurellaceae; g__Haemophilus; s__sputorum	1.50624	0.0585692	0.362592	0.161529	0.871676	NA		k__Bacteria; p__Proteobacteria; c__Betaproteobacteria; o__Neisseriales; f__Neisseriaceae; g__Kingella; s__sp._oral_taxon_459	1.35795	-0.208089	0.405489	-0.51318	0.607826	0.970945		k__Bacteria; p__Proteobacteria; c__Alphaproteobacteria; o__Sphingomonadales; f__Sphingomonadaceae; g__Zymomonas; s__mobilis	1.08803	0.0432434	0.417487	0.10358	0.917502	0.985929		k__Bacteria; p__Firmicutes; c__Clostridia; o__Clostridiales; f__Peptostreptococcaceae_[XI]; g__Peptostreptococcaceae_[XI][G-6]; s__[Eubacterium]_nodatum	1.23621	0.291334	0.489935	0.594637	0.552086	NA
k__Bacteria; p__Synergistetes; c__Synergistia; o__Synergistales; f__Synergistaceae; g__Fretibacterium; s__sp._oral_taxon_359	1.44802	0.0464216	0.36553	0.126998	0.898942	NA		k__Bacteria; p__Bacteroidetes; c__Bacteroidia; o__Bacteroidales; f__Bacteroidaceae; g__Bacteroidaceae_[G-1]; s__sp._oral_taxon_272	1.20638	-0.186576	0.414392	-0.45024	0.652538	0.970945		k__Bacteria; p__Fusobacteria; c__Fusobacteriia; o__Fusobacteriales; f__Fusobacteriaceae; g__Fusobacterium; s__necrophorum	1.36151	0.365097	0.423609	0.861873	0.388757	0.985929		k__Bacteria; p__Firmicutes; c__Clostridia; o__Clostridiales; f__Lachnospiraceae_[XIV]; g__Lachnoanaerobaculum; s__saburreum	1.11776	-0.0732107	0.518985	-0.141065	0.887818	NA
k__Bacteria; p__Spirochaetes; c__Spirochaetia; o__Spirochaetales; f__Spirochaetaceae; g__Treponema; s__lecithinolyticum	1.17793	-0.0824941	0.383123	-0.21532	0.829518	NA		k__Bacteria; p__Chloroflexi; c__Anaerolineae; o__Anaerolineales; f__Anaerolineaceae; g__Anaerolineae_[G-1]; s__sp._oral_taxon_439	1.08803	-0.0355866	0.418703	-0.0849925	0.932267	0.970945		k__Bacteria; p__Proteobacteria; c__Betaproteobacteria; o__Neisseriales; f__Neisseriaceae; g__Neisseria; s__multispecies_spp38_2	15.5192	0.121144	0.472218	0.256542	0.797532	0.985929		k__Bacteria; p__Proteobacteria; c__Gammaproteobacteria; o__Pseudomonadales; f__Pseudomonadaceae; g__Pseudomonas; s__veronii	1.08868	-0.0430088	0.519838	-0.082735	0.934062	NA
k__Bacteria; p__Proteobacteria; c__Betaproteobacteria; o__Neisseriales; f__Neisseriaceae; g__Morococcus; s__cerebrosus	1.12037	-0.104664	0.388399	-0.269475	0.787564	NA		k__Bacteria; p__Firmicutes; c__Clostridia; o__Clostridiales; f__Veillonellaceae; g__Centipeda; s__sp._Oral_Taxon_B01	1.11752	-0.0751318	0.41749	-0.179961	0.857183	0.970945		k__Bacteria; p__Firmicutes; c__Negativicutes; o__Selenomonadales; f__Veillonellaceae; g__Anaeroglobus; s__geminatus	1.26977	-0.258378	0.394227	-0.655403	0.512208	0.985929		k__Bacteria; p__Actinobacteria; c__Actinobacteria; o__Bifidobacteriales; f__Bifidobacteriaceae; g__Scardovia; s__wiggsiae	1.27519	-0.212629	0.515784	-0.412244	0.680161	NA
k__Bacteria; p__Bacteroidetes; c__Flavobacteriia; o__Flavobacteriales; f__Flavobacteriaceae; g__Capnocytophaga; s__sp._oral_taxon_324	1.35338	-0.461968	0.38066	-1.2136	0.224901	NA		k__Bacteria; p__Firmicutes; c__Negativicutes; o__Selenomonadales; f__Veillonellaceae; g__Megasphaera; s__micronuciformis	30.5028	0.182504	0.476087	0.383342	0.701466	0.970945		k__Bacteria; p__Proteobacteria; c__Betaproteobacteria; o__Neisseriales; f__Neisseriaceae; g__Kingella; s__kingae	1.08803	0.0432434	0.417487	0.10358	0.917502	0.985929		k__Bacteria; p__Firmicutes; c__Clostridia; o__Clostridiales; f__Peptostreptococcaceae_[XI]; g__Peptostreptococcaceae_[XI][G-4]; s__sp._oral_taxon_369	1.23527	0.291311	0.489923	0.594606	0.552107	NA
k__Bacteria; p__Firmicutes; c__Clostridia; o__Clostridiales; f__Peptostreptococcaceae_[XI]; g__Peptostreptococcaceae_[XI][G-2]; s__sp._oral_taxon_091	1.11846	-0.10454	0.388345	-0.269194	0.78778	NA		k__Bacteria; p__Firmicutes; c__Negativicutes; o__Selenomonadales; f__Veillonellaceae; g__Selenomonas; s__sp._oral_taxon_134	1.20553	-0.186566	0.414362	-0.450248	0.652532	0.970945		k__Bacteria; p__Spirochaetes; c__Spirochaetia; o__Spirochaetales; f__Spirochaetaceae; g__Treponema; s__maltophilum	1.08863	-0.106506	0.412787	-0.258018	0.796393	0.985929		k__Bacteria; p__Firmicutes; c__Clostridia; o__Clostridiales; f__Veillonellaceae; g__Selenomonas; s__sp._Oral_Taxon_G67	1.08863	-0.0430082	0.519838	-0.0827339	0.934063	NA
k__Bacteria; p__Gracilibacteria_(GN02); c__GN02_[C-1]; o__GN02_[O-1]; f__GN02_[F-1]; g__GN02_[G-1]; s__sp._oral_taxon_872	1.17606	0.276788	0.38024	0.727931	0.466656	NA		k__Bacteria; p__Firmicutes; c__Clostridia; o__Clostridiales; f__Lachnospiraceae_[XIV]; g__Johnsonella; s__sp._oral_taxon_166	1.35597	-0.35152	0.41083	-0.855633	0.392201	0.970945		k__Bacteria; p__Proteobacteria; c__Betaproteobacteria; o__Neisseriales; f__Neisseriaceae; g__Kingella; s__sp._oral_taxon_459	1.35795	-0.259079	0.390282	-0.663824	0.506803	0.985929		k__Bacteria; p__Bacteroidetes; c__Bacteroidia; o__Bacteroidales; f__Prevotellaceae; g__Alloprevotella; s__sp._oral_taxon_912	1.29734	0.00777584	0.501655	0.0155004	0.987633	NA
k__Bacteria; p__Saccharibacteria_(TM7); c__TM7_[C-1]; o__TM7_[O-1]; f__TM7_[F-1]; g__TM7_[G-1]; s__sp._oral_taxon_869	1.17722	0.157906	0.380738	0.414738	0.678334	NA		k__Bacteria; p__Firmicutes; c__Bacilli; o__Lactobacillales; f__Streptococcaceae; g__Streptococcus; s__multispecies_spp40_2	5.86104	0.600618	0.436552	1.37582	0.168876	0.970945		k__Bacteria; p__Bacteroidetes; c__Bacteroidia; o__Bacteroidales; f__Bacteroidaceae; g__Bacteroidaceae_[G-1]; s__sp._oral_taxon_272	1.20638	-0.0786686	0.403965	-0.194741	0.845596	0.985929		k__Bacteria; p__Proteobacteria; c__Alphaproteobacteria; o__Sphingomonadales; f__Sphingomonadaceae; g__Novosphingobium; s__subterraneum	1.08863	0.216767	0.506494	0.427975	0.668669	NA
k__Bacteria; p__Firmicutes; c__Negativicutes; o__Selenomonadales; f__Veillonellaceae; g__Centipeda; s__periodontii	1.32466	0.234585	0.370082	0.633872	0.526164	NA		k__Bacteria; p__Proteobacteria; c__Betaproteobacteria; o__Neisseriales; f__Neisseriaceae; g__Neisseria; s__subflava	270.327	0.44167	0.478819	0.922416	0.356312	0.970945		k__Bacteria; p__Chloroflexi; c__Anaerolineae; o__Anaerolineales; f__Anaerolineaceae; g__Anaerolineae_[G-1]; s__sp._oral_taxon_439	1.08803	0.0432434	0.417487	0.10358	0.917502	0.985929		k__Bacteria; p__Bacteroidetes; c__Bacteroidetes_[C-1]; o__Bacteroidetes_[O-1]; f__Bacteroidetes_[F-1]; g__Bacteroidetes_[G-5]; s__sp._oral_taxon_511	1.26871	0.469455	0.47766	0.982823	0.325694	NA
k__Bacteria; p__Actinobacteria; c__Actinobacteria; o__Actinomycetales; f__Actinomycetaceae; g__Actinomyces; s__oris	1.11811	-0.104516	0.388342	-0.269134	0.787827	NA		k__Bacteria; p__Proteobacteria; c__Gammaproteobacteria; o__Pasteurellales; f__Pasteurellaceae; g__Aggregatibacter; s__sp._oral_taxon_949	1.11803	-0.0751409	0.417493	-0.179981	0.857167	0.970945		k__Bacteria; p__Bacteroidetes; c__Bacteroidia; o__Bacteroidales; f__Prevotellaceae; g__Alloprevotella; s__sp._oral_taxon_913	1.17791	0.0202197	0.409227	0.0494096	0.960593	0.985929		k__Bacteria; p__Spirochaetes; c__Spirochaetia; o__Spirochaetales; f__Spirochaetaceae; g__Treponema; s__lecithinolyticum	1.17793	0.122239	0.504009	0.242532	0.808368	NA
k__Bacteria; p__Spirochaetes; c__Spirochaetia; o__Spirochaetales; f__Spirochaetaceae; g__Treponema; s__sp._oral_taxon_236	1.08863	-0.0514399	0.390276	-0.131804	0.895139	NA		k__Bacteria; p__Firmicutes; c__Erysipelotrichia; o__Erysipelotrichales; f__Erysipelotrichaceae; g__Solobacterium; s__moorei	1.20849	-0.036407	0.408685	-0.0890834	0.929016	0.970945		k__Bacteria; p__Firmicutes; c__Clostridia; o__Clostridiales; f__Veillonellaceae; g__Centipeda; s__sp._Oral_Taxon_B01	1.11752	-0.0627556	0.411499	-0.152505	0.878789	0.985929		k__Bacteria; p__Proteobacteria; c__Betaproteobacteria; o__Neisseriales; f__Neisseriaceae; g__Morococcus; s__cerebrosus	1.12037	-0.0732426	0.519005	-0.141121	0.887774	NA
k__Bacteria; p__Firmicutes; c__Clostridia; o__Clostridiales; f__Peptostreptococcaceae_[XI]; g__Peptostreptococcaceae_[XI][G-9]; s__[Eubacterium]_brachy	1.41305	0.192135	0.365674	0.525428	0.599286	NA		k__Bacteria; p__Firmicutes; c__Clostridia; o__Clostridiales; f__Peptostreptococcaceae_[XI]; g__Mogibacterium; s__timidum	1.2092	-0.0364266	0.408693	-0.0891296	0.928979	0.970945		k__Bacteria; p__Firmicutes; c__Negativicutes; o__Selenomonadales; f__Veillonellaceae; g__Megasphaera; s__micronuciformis	30.5028	0.228946	0.479571	0.477398	0.633079	0.985929		k__Bacteria; p__Bacteroidetes; c__Flavobacteriia; o__Flavobacteriales; f__Flavobacteriaceae; g__Capnocytophaga; s__sp._oral_taxon_324	1.35338	1.35171	0.428501	3.15451	0.0016077	NA
k__Bacteria; p__Proteobacteria; c__Betaproteobacteria; o__Neisseriales; f__Neisseriaceae; g__Neisseria; s__sp._oral_taxon_020	1.59734	-0.15464	0.36526	-0.423369	0.672026	NA		k__Bacteria; p__Bacteroidetes; c__Bacteroidia; o__Bacteroidales; f__Prevotellaceae; g__Prevotella; s__saccharolytica	1.23737	-0.221583	0.41348	-0.535898	0.592029	0.970945		k__Bacteria; p__Firmicutes; c__Negativicutes; o__Selenomonadales; f__Veillonellaceae; g__Selenomonas; s__sp._oral_taxon_134	1.20553	0.0596067	0.408292	0.14599	0.883929	0.985929		k__Bacteria; p__Firmicutes; c__Clostridia; o__Clostridiales; f__Peptostreptococcaceae_[XI]; g__Peptostreptococcaceae_[XI][G-2]; s__sp._oral_taxon_091	1.11846	-0.0732196	0.518989	-0.141081	0.887806	NA
k__Bacteria; p__Bacteroidetes; c__Flavobacteriia; o__Flavobacteriales; f__Flavobacteriaceae; g__Bergeyella; s__sp._oral_taxon_907	1.11776	-0.104492	0.388338	-0.269075	0.787872	NA		k__Bacteria; p__Firmicutes; c__Mollicutes; o__Mycoplasmatales; f__Mycoplasmataceae; g__Mycoplasma; s__faucium	1.23788	-0.221567	0.413541	-0.535781	0.59211	0.970945		k__Bacteria; p__Firmicutes; c__Clostridia; o__Clostridiales; f__Lachnospiraceae_[XIV]; g__Johnsonella; s__sp._oral_taxon_166	1.35597	0.108246	0.400076	0.270564	0.786727	0.985929		k__Bacteria; p__Gracilibacteria_(GN02); c__GN02_[C-1]; o__GN02_[O-1]; f__GN02_[F-1]; g__GN02_[G-1]; s__sp._oral_taxon_872	1.17606	-0.131173	0.517453	-0.253498	0.799883	NA
k__Bacteria; p__Bacteroidetes; c__Flavobacteriia; o__Flavobacteriales; f__Flavobacteriaceae; g__Capnocytophaga; s__haemolytica	1.11895	0.021913	0.38685	0.0566446	0.954828	NA		k__Bacteria; p__Firmicutes; c__Erysipelotrichia; o__Erysipelotrichales; f__Erysipelotrichaceae; g__Bulleidia; s__extructa	1.14749	-0.113444	0.416382	-0.272453	0.785274	0.970945		k__Bacteria; p__Firmicutes; c__Bacilli; o__Lactobacillales; f__Streptococcaceae; g__Streptococcus; s__multispecies_spp40_2	5.86104	-0.685774	0.433371	-1.58242	0.113554	0.985929		k__Bacteria; p__Saccharibacteria_(TM7); c__TM7_[C-1]; o__TM7_[O-1]; f__TM7_[F-1]; g__TM7_[G-1]; s__sp._oral_taxon_869	1.17722	-0.131202	0.517441	-0.253559	0.799837	NA
k__Bacteria; p__Synergistetes; c__Synergistia; o__Synergistales; f__Synergistaceae; g__Fretibacterium; s__sp._oral_taxon_358	1.11718	0.147018	0.385746	0.381126	0.70311	NA		k__Bacteria; p__Proteobacteria; c__Gammaproteobacteria; o__Pasteurellales; f__Pasteurellaceae; g__Haemophilus; s__influenzae	1.11907	0.0798888	0.411983	0.193913	0.846244	0.970945		k__Bacteria; p__Proteobacteria; c__Betaproteobacteria; o__Neisseriales; f__Neisseriaceae; g__Neisseria; s__subflava	270.327	0.395953	0.48345	0.819015	0.412778	0.985929		k__Bacteria; p__Firmicutes; c__Negativicutes; o__Selenomonadales; f__Veillonellaceae; g__Centipeda; s__periodontii	1.32466	-0.019233	0.501317	-0.0383649	0.969397	NA
k__Bacteria; p__Firmicutes; c__Clostridia; o__Clostridiales; f__Veillonellaceae; g__Selenomonas; s__sp._Oral_Taxon_G55	1.14676	-0.155438	0.386654	-0.402007	0.687679	NA		k__Bacteria; p__Firmicutes; c__Clostridia; o__Clostridiales; f__Eubacteriaceae_[XV]; g__Pseudoramibacter; s__alactolyticus	1.11776	-0.0751362	0.417491	-0.179971	0.857176	0.970945		k__Bacteria; p__Proteobacteria; c__Gammaproteobacteria; o__Pasteurellales; f__Pasteurellaceae; g__Aggregatibacter; s__sp._oral_taxon_949	1.11803	-0.0627739	0.411504	-0.152547	0.878755	0.985929		k__Bacteria; p__Actinobacteria; c__Actinobacteria; o__Actinomycetales; f__Actinomycetaceae; g__Actinomyces; s__oris	1.11811	0.184329	0.5056	0.364574	0.715429	NA
k__Bacteria; p__Actinobacteria; c__Actinobacteria; o__Propionibacteriales; f__Propionibacteriaceae; g__Propionibacterium; s__sp._oral_taxon_194	1.11659	0.146951	0.385776	0.380923	0.70326	NA		k__Bacteria; p__Proteobacteria; c__Deltaproteobacteria; o__Desulfobacterales; f__Desulfobulbaceae; g__Desulfobulbus; s__sp._oral_taxon_041	1.14724	0.0398619	0.410777	0.0970403	0.922694	0.970945		k__Bacteria; p__Firmicutes; c__Erysipelotrichia; o__Erysipelotrichales; f__Erysipelotrichaceae; g__Solobacterium; s__moorei	1.20849	0.0596658	0.408278	0.14614	0.883811	0.985929		k__Bacteria; p__Spirochaetes; c__Spirochaetia; o__Spirochaetales; f__Spirochaetaceae; g__Treponema; s__sp._oral_taxon_236	1.08863	-0.0430082	0.519838	-0.0827339	0.934063	NA
k__Bacteria; p__Spirochaetes; c__Spirochaetia; o__Spirochaetales; f__Spirochaetaceae; g__Treponema; s__amylovorum	1.26639	0.450057	0.37474	1.20098	0.229757	NA		k__Bacteria; p__Firmicutes; c__Clostridia; o__Clostridiales; f__Clostridiales_[F-1]; g__Clostridiales_[F-1][G-1]; s__sp._oral_taxon_093	1.17546	-0.15054	0.415326	-0.362463	0.717006	0.970945		k__Bacteria; p__Firmicutes; c__Clostridia; o__Clostridiales; f__Peptostreptococcaceae_[XI]; g__Mogibacterium; s__timidum	1.2092	-0.078591	0.403839	-0.19461	0.845698	0.985929		k__Bacteria; p__Bacteroidetes; c__Flavobacteriia; o__Flavobacteriales; f__Flavobacteriaceae; g__Bergeyella; s__sp._oral_taxon_907	1.11776	-0.0732107	0.518985	-0.141065	0.887818	NA
k__Bacteria; p__Bacteroidetes; c__Bacteroidia; o__Bacteroidales; f__Prevotellaceae; g__Prevotella; s__multispecies_spp37_3	1.23855	0.0533452	0.37712	0.141454	0.887511	NA		k__Bacteria; p__Saccharibacteria_(TM7); c__TM7_[C-1]; o__TM7_[O-1]; f__TM7_[F-1]; g__TM7_[G-4]; s__sp._oral_taxon_355	1.08803	-0.0355866	0.418703	-0.0849925	0.932267	0.970945		k__Bacteria; p__Bacteroidetes; c__Bacteroidia; o__Bacteroidales; f__Prevotellaceae; g__Prevotella; s__saccharolytica	1.23737	-0.0385326	0.402786	-0.0956653	0.923786	0.985929		k__Bacteria; p__Bacteroidetes; c__Flavobacteriia; o__Flavobacteriales; f__Flavobacteriaceae; g__Capnocytophaga; s__haemolytica	1.11895	0.184423	0.505601	0.364759	0.715291	NA
k__Bacteria; p__Synergistetes; c__Synergistia; o__Synergistales; f__Synergistaceae; g__Fretibacterium; s__sp._oral_taxon_360	1.38707	0.137103	0.367689	0.372877	0.70924	NA		k__Bacteria; p__Gracilibacteria_(GN02); c__GN02_[C-1]; o__GN02_[O-1]; f__GN02_[F-1]; g__GN02_[G-1]; s__sp._oral_taxon_871	1.08803	-0.0355866	0.418703	-0.0849925	0.932267	0.970945		k__Bacteria; p__Firmicutes; c__Mollicutes; o__Mycoplasmatales; f__Mycoplasmataceae; g__Mycoplasma; s__faucium	1.23788	-0.171115	0.399038	-0.428819	0.668055	0.985929		k__Bacteria; p__Synergistetes; c__Synergistia; o__Synergistales; f__Synergistaceae; g__Fretibacterium; s__sp._oral_taxon_358	1.11718	0.18438	0.505591	0.364682	0.715349	NA
k__Bacteria; p__Actinobacteria; c__Actinobacteria; o__Corynebacteriales; f__Corynebacteriaceae; g__Corynebacterium; s__accolens	1.08803	0.077289	0.388922	0.198726	0.842477	NA		k__Bacteria; p__Actinobacteria; c__Actinobacteria; o__Actinomycetales; f__Actinomycetaceae; g__Actinomyces; s__georgiae	1.08745	-0.0355772	0.4187	-0.0849706	0.932285	0.970945		k__Bacteria; p__Firmicutes; c__Erysipelotrichia; o__Erysipelotrichales; f__Erysipelotrichaceae; g__Bulleidia; s__extructa	1.14749	0.125491	0.415274	0.302188	0.762509	0.985929		k__Bacteria; p__Firmicutes; c__Clostridia; o__Clostridiales; f__Veillonellaceae; g__Selenomonas; s__sp._Oral_Taxon_G55	1.14676	0.600956	0.480104	1.25172	0.210672	NA
k__Bacteria; p__Bacteroidetes; c__Bacteroidia; o__Bacteroidales; f__Prevotellaceae; g__Prevotella; s__sp._oral_taxon_526	1.32527	0.448052	0.370105	1.21061	0.226045	NA		k__Bacteria; p__Bacteroidetes; c__Flavobacteriia; o__Flavobacteriales; f__Flavobacteriaceae; g__Capnocytophaga; s__sp._oral_taxon_864	1.11718	-0.0751255	0.417487	-0.179947	0.857194	0.970945		k__Bacteria; p__Proteobacteria; c__Gammaproteobacteria; o__Pasteurellales; f__Pasteurellaceae; g__Haemophilus; s__influenzae	1.11907	-0.0629609	0.411509	-0.153	0.878398	0.985929		k__Bacteria; p__Actinobacteria; c__Actinobacteria; o__Propionibacteriales; f__Propionibacteriaceae; g__Propionibacterium; s__sp._oral_taxon_194	1.11659	-0.0731942	0.518982	-0.141034	0.887843	NA
k__Bacteria; p__Firmicutes; c__Negativicutes; o__Selenomonadales; f__Veillonellaceae; g__Selenomonas; s__sp._oral_taxon_146	1.1469	-0.031354	0.384942	-0.0814512	0.935083	NA		k__Bacteria; p__Spirochaetes; c__Spirochaetia; o__Spirochaetales; f__Spirochaetaceae; g__Treponema; s__sp._oral_taxon_257	1.32839	-0.175671	0.405818	-0.432881	0.665101	0.970945		k__Bacteria; p__Firmicutes; c__Clostridia; o__Clostridiales; f__Eubacteriaceae_[XV]; g__Pseudoramibacter; s__alactolyticus	1.11776	0.0850725	0.416283	0.204362	0.838071	0.985929		k__Bacteria; p__Spirochaetes; c__Spirochaetia; o__Spirochaetales; f__Spirochaetaceae; g__Treponema; s__amylovorum	1.26639	1.17226	0.44078	2.65952	0.00782522	NA
k__Bacteria; p__Bacteroidetes; c__Bacteroidia; o__Bacteroidales; f__Prevotellaceae; g__Prevotella; s__oralis	1.08803	0.077289	0.388922	0.198726	0.842477	NA		k__Bacteria; p__Actinobacteria; c__Actinobacteria; o__Actinomycetales; f__Actinomycetaceae; g__Actinobaculum; s__sp._oral_taxon_183	1.35645	-0.0704037	0.399934	-0.176038	0.860264	0.970945		k__Bacteria; p__Proteobacteria; c__Deltaproteobacteria; o__Desulfobacterales; f__Desulfobulbaceae; g__Desulfobulbus; s__sp._oral_taxon_041	1.14724	-0.0205772	0.410312	-0.0501501	0.960003	0.985929		k__Bacteria; p__Bacteroidetes; c__Bacteroidia; o__Bacteroidales; f__Prevotellaceae; g__Prevotella; s__multispecies_spp37_3	1.23855	-0.18619	0.516135	-0.360738	0.718295	NA
k__Bacteria; p__Firmicutes; c__Clostridia; o__Clostridiales; f__Lachnospiraceae_[XIV]; g__Johnsonella; s__ignava	1.11779	-0.104494	0.388339	-0.269078	0.787869	NA		k__Bacteria; p__Proteobacteria; c__Betaproteobacteria; o__Neisseriales; f__Neisseriaceae; g__Neisseria; s__bacilliformis	1.26581	-0.255318	0.412927	-0.618312	0.536369	0.970945		k__Bacteria; p__Firmicutes; c__Clostridia; o__Clostridiales; f__Clostridiales_[F-1]; g__Clostridiales_[F-1][G-1]; s__sp._oral_taxon_093	1.17546	0.164514	0.414233	0.397154	0.691254	0.985929		k__Bacteria; p__Bacteroidetes; c__Flavobacteriia; o__Flavobacteriales; f__Flavobacteriaceae; g__Capnocytophaga; s__sputigena	9.22993	1.82064	0.535424	3.40037	NA	NA
k__Bacteria; p__Firmicutes; c__Bacilli; o__Lactobacillales; f__Lactobacillaceae; g__Lactobacillus; s__delbrueckii	1.08745	0.0772362	0.388918	0.198593	0.842581	NA		k__Bacteria; p__Actinobacteria; c__Actinobacteria; o__Actinomycetales; f__Micrococcaceae; g__Rothia; s__dentocariosa	14.2089	0.462933	0.459514	1.00744	0.313724	0.970945		k__Bacteria; p__Saccharibacteria_(TM7); c__TM7_[C-1]; o__TM7_[O-1]; f__TM7_[F-1]; g__TM7_[G-4]; s__sp._oral_taxon_355	1.08803	0.0432434	0.417487	0.10358	0.917502	0.985929		k__Bacteria; p__Actinobacteria; c__Actinobacteria; o__Corynebacteriales; f__Corynebacteriaceae; g__Corynebacterium; s__accolens	1.08803	0.21671	0.506493	0.427864	0.66875	NA
k__Bacteria; p__Bacteroidetes; c__Bacteroidia; o__Bacteroidales; f__Prevotellaceae; g__Prevotella; s__sp._oral_taxon_472	1.32774	0.019599	0.371787	0.0527157	0.957958	NA		k__Bacteria; p__Bacteroidetes; c__Bacteroidia; o__Bacteroidales; f__Bacteroidaceae; g__Bacteroides; s__heparinolyticus	1.08803	-0.0355866	0.418703	-0.0849925	0.932267	0.970945		k__Bacteria; p__Gracilibacteria_(GN02); c__GN02_[C-1]; o__GN02_[O-1]; f__GN02_[F-1]; g__GN02_[G-1]; s__sp._oral_taxon_871	1.08803	0.0432434	0.417487	0.10358	0.917502	0.985929		k__Bacteria; p__Bacteroidetes; c__Bacteroidia; o__Bacteroidales; f__Prevotellaceae; g__Prevotella; s__sp._oral_taxon_526	1.32527	-0.263136	0.514735	-0.511207	0.609206	NA
k__Bacteria; p__Actinobacteria; c__Actinobacteria; o__Bifidobacteriales; f__Bifidobacteriaceae; g__Bifidobacterium; s__dentium	1.11718	0.021841	0.386834	0.0564608	0.954975	NA		k__Bacteria; p__Proteobacteria; c__Betaproteobacteria; o__Rhodocyclales; f__Rhodocyclaceae; g__Propionivibrio; s__sp._Oral_Taxon_C33	1.08803	-0.0355866	0.418703	-0.0849925	0.932267	0.970945		k__Bacteria; p__Actinobacteria; c__Actinobacteria; o__Actinomycetales; f__Actinomycetaceae; g__Actinomyces; s__georgiae	1.08745	0.0432142	0.417481	0.103512	0.917557	0.985929		k__Bacteria; p__Firmicutes; c__Negativicutes; o__Selenomonadales; f__Veillonellaceae; g__Selenomonas; s__sp._oral_taxon_146	1.1469	-0.102589	0.518188	-0.197977	0.843063	NA
k__Bacteria; p__Firmicutes; c__Clostridia; o__Clostridiales; f__Veillonellaceae; g__Selenomonas; s__sp._Oral_Taxon_H63	1.11776	0.147064	0.385787	0.381206	0.703051	NA		k__Bacteria; p__Firmicutes; c__Negativicutes; o__Selenomonadales; f__Veillonellaceae; g__Selenomonas; s__flueggei	1.15012	-0.1135	0.416384	-0.272584	0.785173	0.970945		k__Bacteria; p__Bacteroidetes; c__Flavobacteriia; o__Flavobacteriales; f__Flavobacteriaceae; g__Capnocytophaga; s__sp._oral_taxon_864	1.11718	0.0850414	0.416277	0.20429	0.838127	0.985929		k__Bacteria; p__Bacteroidetes; c__Bacteroidia; o__Bacteroidales; f__Prevotellaceae; g__Prevotella; s__oralis	1.08803	-0.0430013	0.519835	-0.0827211	0.934073	NA
k__Bacteria; p__Saccharibacteria_(TM7); c__TM7_[C-1]; o__TM7_[O-1]; f__TM7_[F-1]; g__TM7_[G-1]; s__sp._oral_taxon_488	1.17722	0.157891	0.380786	0.414645	0.678402	NA		k__Bacteria; p__Firmicutes; c__Negativicutes; o__Selenomonadales; f__Veillonellaceae; g__Veillonellaceae_[G-1]; s__sp._oral_taxon_155	1.23551	-0.221511	0.413499	-0.535698	0.592167	0.970945		k__Bacteria; p__Spirochaetes; c__Spirochaetia; o__Spirochaetales; f__Spirochaetaceae; g__Treponema; s__sp._oral_taxon_257	1.32839	-0.299629	0.390266	-0.767755	0.442633	0.985929		k__Bacteria; p__Firmicutes; c__Clostridia; o__Clostridiales; f__Lachnospiraceae_[XIV]; g__Johnsonella; s__ignava	1.11779	0.184335	0.505598	0.364589	0.715418	NA
k__Plantae; p__Angiosperms; c__Magnoliids; o__Laurales; f__Calycanthaceae; g__Calycanthus; s__floridus_Oral_Taxon_D07	1.15043	-0.0312011	0.384977	-0.0810468	0.935405	NA		k__Bacteria; p__Proteobacteria; c__Gammaproteobacteria; o__Xanthomonadales; f__Xanthomonadaceae; g__Vulcaniibacterium; s__thermophilum	1.08863	-0.035596	0.418707	-0.0850141	0.93225	0.970945		k__Bacteria; p__Actinobacteria; c__Actinobacteria; o__Actinomycetales; f__Actinomycetaceae; g__Actinobaculum; s__sp._oral_taxon_183	1.35645	-0.490048	0.383972	-1.27626	0.201864	0.985929		k__Bacteria; p__Firmicutes; c__Bacilli; o__Lactobacillales; f__Lactobacillaceae; g__Lactobacillus; s__delbrueckii	1.08745	-0.0429943	0.519832	-0.0827081	0.934084	NA
k__Bacteria; p__Firmicutes; c__Negativicutes; o__Selenomonadales; f__Veillonellaceae; g__Veillonellaceae_[G-1]; s__sp._oral_taxon_145	1.11659	0.146951	0.385776	0.380923	0.70326	NA		k__Bacteria; p__Fusobacteria; c__Fusobacteriia; o__Fusobacteriales; f__Leptotrichiaceae; g__Leptotrichia; s__goodfellowii	1.23807	-0.221594	0.413501	-0.535898	0.592029	0.970945		k__Bacteria; p__Proteobacteria; c__Betaproteobacteria; o__Neisseriales; f__Neisseriaceae; g__Neisseria; s__bacilliformis	1.26581	0.274353	0.412403	0.665254	0.505888	0.985929		k__Bacteria; p__Bacteroidetes; c__Bacteroidia; o__Bacteroidales; f__Prevotellaceae; g__Prevotella; s__sp._oral_taxon_472	1.32774	-0.2633	0.514651	-0.51161	0.608924	NA
k__Bacteria; p__Proteobacteria; c__Alphaproteobacteria; o__Sphingomonadales; f__Sphingomonadaceae; g__Zymomonas; s__mobilis	1.08803	-0.0514011	0.390271	-0.131706	0.895217	NA		k__Bacteria; p__Firmicutes; c__Negativicutes; o__Selenomonadales; f__Veillonellaceae; g__Veillonellaceae_[G-1]; s__sp._oral_taxon_483	1.11776	-0.0751353	0.417496	-0.179967	0.857179	0.970945		k__Bacteria; p__Actinobacteria; c__Actinobacteria; o__Actinomycetales; f__Micrococcaceae; g__Rothia; s__dentocariosa	14.2089	0.35825	0.461356	0.776515	0.437445	0.985929		k__Bacteria; p__Firmicutes; c__Bacilli; o__Bacillales; f__Gemellaceae; g__Gemella; s__sanguinis	24.8394	2.94367	0.5326	5.52697	NA	NA
k__Bacteria; p__Fusobacteria; c__Fusobacteriia; o__Fusobacteriales; f__Fusobacteriaceae; g__Fusobacterium; s__necrophorum	1.36151	-0.453821	0.391851	-1.15815	0.246805	NA		k__Bacteria; p__Spirochaetes; c__Spirochaetia; o__Spirochaetales; f__Spirochaetaceae; g__Treponema; s__sp._oral_taxon_256	1.11776	-0.0751362	0.417491	-0.179971	0.857176	0.970945		k__Bacteria; p__Bacteroidetes; c__Bacteroidia; o__Bacteroidales; f__Bacteroidaceae; g__Bacteroides; s__heparinolyticus	1.08803	0.0432434	0.417487	0.10358	0.917502	0.985929		k__Bacteria; p__Actinobacteria; c__Actinobacteria; o__Bifidobacteriales; f__Bifidobacteriaceae; g__Bifidobacterium; s__dentium	1.11718	-0.073203	0.518982	-0.141051	0.887829	NA
k__Bacteria; p__Firmicutes; c__Negativicutes; o__Selenomonadales; f__Veillonellaceae; g__Anaeroglobus; s__geminatus	1.26977	-0.110088	0.376815	-0.292154	0.770169	NA		k__Bacteria; p__Firmicutes; c__Bacilli; o__Lactobacillales; f__Lactobacillaceae; g__Lactobacillus; s__vaginalis	1.08803	-0.0355866	0.418703	-0.0849925	0.932267	0.970945		k__Bacteria; p__Proteobacteria; c__Betaproteobacteria; o__Rhodocyclales; f__Rhodocyclaceae; g__Propionivibrio; s__sp._Oral_Taxon_C33	1.08803	0.0432434	0.417487	0.10358	0.917502	0.985929		k__Bacteria; p__Firmicutes; c__Clostridia; o__Clostridiales; f__Veillonellaceae; g__Selenomonas; s__sp._Oral_Taxon_H63	1.11776	0.419563	0.492825	0.851343	0.394579	NA
k__Bacteria; p__Proteobacteria; c__Betaproteobacteria; o__Neisseriales; f__Neisseriaceae; g__Kingella; s__kingae	1.08803	0.077289	0.388922	0.198726	0.842477	NA		k__Bacteria; p__Firmicutes; c__Bacilli; o__Lactobacillales; f__Streptococcaceae; g__Streptococcus; s__sobrinus	1.11776	-0.0751353	0.417496	-0.179967	0.857179	0.970945		k__Bacteria; p__Firmicutes; c__Negativicutes; o__Selenomonadales; f__Veillonellaceae; g__Selenomonas; s__flueggei	1.15012	0.12566	0.415198	0.302652	0.762155	0.985929		k__Bacteria; p__Saccharibacteria_(TM7); c__TM7_[C-1]; o__TM7_[O-1]; f__TM7_[F-1]; g__TM7_[G-1]; s__sp._oral_taxon_488	1.17722	-0.131198	0.517448	-0.253549	0.799844	NA
k__Bacteria; p__Spirochaetes; c__Spirochaetia; o__Spirochaetales; f__Spirochaetaceae; g__Treponema; s__maltophilum	1.08863	-0.0514399	0.390276	-0.131804	0.895139	NA		k__Bacteria; p__Bacteroidetes; c__Bacteroidia; o__Bacteroidales; f__Porphyromonadaceae; g__Porphyromonas; s__sp._oral_taxon_930	1.14749	0.329915	0.401267	0.822183	0.410973	0.970945		k__Bacteria; p__Firmicutes; c__Negativicutes; o__Selenomonadales; f__Veillonellaceae; g__Veillonellaceae_[G-1]; s__sp._oral_taxon_155	1.23551	0.0976213	0.407426	0.239605	0.810636	0.985929		k__Plantae; p__Angiosperms; c__Magnoliids; o__Laurales; f__Calycanthaceae; g__Calycanthus; s__floridus_Oral_Taxon_D07	1.15043	-0.102639	0.518212	-0.198063	0.842995	NA
k__Bacteria; p__Firmicutes; c__Clostridia; o__Clostridiales; f__Lachnospiraceae_[XIVa]; g__Lachnospiraceae_[G]; s__sp._Oral_Taxon_B32	1.38649	-0.389909	0.377838	-1.03195	0.302097	NA		k__Bacteria; p__Proteobacteria; c__Epsilonproteobacteria; o__Campylobacterales; f__Campylobacteraceae; g__Campylobacter; s__curvus	1.17721	-0.15058	0.415342	-0.362545	0.716945	0.970945		k__Bacteria; p__Proteobacteria; c__Gammaproteobacteria; o__Xanthomonadales; f__Xanthomonadaceae; g__Vulcaniibacterium; s__thermophilum	1.08863	0.0432722	0.417493	0.103648	0.917449	0.985929		k__Bacteria; p__Firmicutes; c__Negativicutes; o__Selenomonadales; f__Veillonellaceae; g__Veillonellaceae_[G-1]; s__sp._oral_taxon_145	1.11659	-0.0731942	0.518982	-0.141034	0.887843	NA
k__Bacteria; p__Proteobacteria; c__Betaproteobacteria; o__Neisseriales; f__Neisseriaceae; g__Kingella; s__sp._oral_taxon_459	1.35795	-0.0259675	0.37162	-0.0698766	0.944292	NA		k__Bacteria; p__Proteobacteria; c__Gammaproteobacteria; o__Pasteurellales; f__Pasteurellaceae; g__Haemophilus; s__sp._oral_taxon_908	1.20747	-0.186604	0.414403	-0.450297	0.652496	0.970945		k__Bacteria; p__Fusobacteria; c__Fusobacteriia; o__Fusobacteriales; f__Leptotrichiaceae; g__Leptotrichia; s__goodfellowii	1.23807	0.0979864	0.407355	0.240543	0.809909	0.985929		k__Bacteria; p__Proteobacteria; c__Alphaproteobacteria; o__Sphingomonadales; f__Sphingomonadaceae; g__Zymomonas; s__mobilis	1.08803	-0.0430013	0.519835	-0.0827211	0.934073	NA
k__Bacteria; p__Bacteroidetes; c__Bacteroidia; o__Bacteroidales; f__Bacteroidaceae; g__Bacteroidaceae_[G-1]; s__sp._oral_taxon_272	1.20638	0.104304	0.379033	0.275185	0.783174	NA		k__Bacteria; p__Firmicutes; c__Clostridia; o__Clostridiales; f__Lachnospiraceae_[XIV]; g__Butyrivibrio; s__sp._oral_taxon_080	1.08803	-0.0355866	0.418703	-0.0849925	0.932267	0.970945		k__Bacteria; p__Firmicutes; c__Negativicutes; o__Selenomonadales; f__Veillonellaceae; g__Veillonellaceae_[G-1]; s__sp._oral_taxon_483	1.11776	0.0850666	0.416314	0.204333	0.838094	0.985929		k__Bacteria; p__Fusobacteria; c__Fusobacteriia; o__Fusobacteriales; f__Fusobacteriaceae; g__Fusobacterium; s__necrophorum	1.36151	-0.273323	0.528171	-0.51749	0.604814	NA
k__Bacteria; p__Chloroflexi; c__Anaerolineae; o__Anaerolineales; f__Anaerolineaceae; g__Anaerolineae_[G-1]; s__sp._oral_taxon_439	1.08803	0.077289	0.388922	0.198726	0.842477	NA		k__Bacteria; p__Firmicutes; c__Clostridia; o__Clostridiales; f__Veillonellaceae; g__Mitsuokella; s__sp._Oral_Taxon_G68	1.08779	-0.0355827	0.418702	-0.0849834	0.932275	0.970945		k__Bacteria; p__Spirochaetes; c__Spirochaetia; o__Spirochaetales; f__Spirochaetaceae; g__Treponema; s__sp._oral_taxon_256	1.11776	0.0850725	0.416283	0.204362	0.838071	0.985929		k__Bacteria; p__Firmicutes; c__Negativicutes; o__Selenomonadales; f__Veillonellaceae; g__Anaeroglobus; s__geminatus	1.26977	-0.21264	0.51555	-0.412454	0.680007	NA
k__Bacteria; p__Bacteroidetes; c__Bacteroidia; o__Bacteroidales; f__Prevotellaceae; g__Alloprevotella; s__sp._oral_taxon_913	1.17791	-0.0824924	0.383123	-0.215316	0.829521	NA		k__Bacteria; p__Firmicutes; c__Clostridia; o__Clostridiales; f__Lachnospiraceae_[XIV]; g__Shuttleworthia; s__satelles	1.11915	0.0798427	0.411985	0.1938	0.846333	0.970945		k__Bacteria; p__Firmicutes; c__Bacilli; o__Lactobacillales; f__Lactobacillaceae; g__Lactobacillus; s__vaginalis	1.08803	-0.106434	0.412784	-0.257844	0.796527	0.985929		k__Bacteria; p__Proteobacteria; c__Betaproteobacteria; o__Neisseriales; f__Neisseriaceae; g__Kingella; s__kingae	1.08803	-0.0430013	0.519835	-0.0827211	0.934073	NA
k__Bacteria; p__Firmicutes; c__Clostridia; o__Clostridiales; f__Veillonellaceae; g__Centipeda; s__sp._Oral_Taxon_B01	1.11752	0.0219173	0.386836	0.0566579	0.954818	NA		k__Bacteria; p__Firmicutes; c__Bacilli; o__Lactobacillales; f__Lactobacillaceae; g__Lactobacillus; s__kitasatonis	1.08979	-0.0356134	0.418714	-0.0850542	0.932218	0.970945		k__Bacteria; p__Spirochaetes; c__Spirochaetia; o__Spirochaetales; f__Spirochaetaceae; g__Treponema; s__sp._oral_taxon_231	1.1785	0.164741	0.414148	0.397782	0.690791	0.985929		k__Bacteria; p__Spirochaetes; c__Spirochaetia; o__Spirochaetales; f__Spirochaetaceae; g__Treponema; s__maltophilum	1.08863	0.216767	0.506494	0.427975	0.668669	NA
k__Bacteria; p__Proteobacteria; c__Gammaproteobacteria; o__Pasteurellales; f__Pasteurellaceae; g__Pasteurella; s__multocida	1.05831	0.0038937	0.392349	0.00992406	0.992082	NA		k__Bacteria; p__Proteobacteria; c__Epsilonproteobacteria; o__Campylobacterales; f__Campylobacteraceae; g__Campylobacter; s__concisus	9.38344	-0.349574	0.423567	-0.82531	0.409196	0.970945		k__Bacteria; p__Fusobacteria; c__Fusobacteriia; o__Fusobacteriales; f__Leptotrichiaceae; g__Leptotrichia; s__buccalis	4.17846	-0.0396227	0.434605	-0.0911694	0.927358	0.985929		k__Bacteria; p__Proteobacteria; c__Betaproteobacteria; o__Neisseriales; f__Neisseriaceae; g__Kingella; s__sp._oral_taxon_459	1.35795	-0.287422	0.514549	-0.55859	0.576441	NA
k__Bacteria; p__Firmicutes; c__Negativicutes; o__Selenomonadales; f__Veillonellaceae; g__Selenomonas; s__sp._oral_taxon_134	1.20553	0.221256	0.378126	0.585139	0.558454	NA		k__Bacteria; p__Firmicutes; c__Negativicutes; o__Selenomonadales; f__Veillonellaceae; g__Veillonella; s__denticariosi	1.08803	-0.0355866	0.418703	-0.0849925	0.932267	0.970945		k__Bacteria; p__Firmicutes; c__Bacilli; o__Lactobacillales; f__Streptococcaceae; g__Streptococcus; s__sobrinus	1.11776	0.0850666	0.416314	0.204333	0.838094	0.985929		k__Bacteria; p__Bacteroidetes; c__Bacteroidia; o__Bacteroidales; f__Bacteroidaceae; g__Bacteroidaceae_[G-1]; s__sp._oral_taxon_272	1.20638	0.322248	0.490544	0.656919	0.511233	NA
k__Bacteria; p__Firmicutes; c__Clostridia; o__Clostridiales; f__Lachnospiraceae_[XIV]; g__Johnsonella; s__sp._oral_taxon_166	1.35597	0.184812	0.368475	0.50156	0.615977	NA		k__Bacteria; p__Spirochaetes; c__Spirochaetia; o__Spirochaetales; f__Spirochaetaceae; g__Treponema; s__sp._oral_taxon_270	1.08745	-0.0355772	0.4187	-0.0849706	0.932285	0.970945		k__Bacteria; p__Bacteroidetes; c__Bacteroidia; o__Bacteroidales; f__Porphyromonadaceae; g__Porphyromonas; s__sp._oral_taxon_930	1.14749	0.125491	0.415274	0.302188	0.762509	0.985929		k__Bacteria; p__Chloroflexi; c__Anaerolineae; o__Anaerolineales; f__Anaerolineaceae; g__Anaerolineae_[G-1]; s__sp._oral_taxon_439	1.08803	-0.0430013	0.519835	-0.0827211	0.934073	NA
k__Bacteria; p__Proteobacteria; c__Gammaproteobacteria; o__Pasteurellales; f__Pasteurellaceae; g__Aggregatibacter; s__sp._oral_taxon_949	1.11803	-0.104511	0.388341	-0.269121	0.787836	NA		k__Bacteria; p__Bacteroidetes; c__Bacteroidia; o__Bacteroidales; f__Porphyromonadaceae; g__Tannerella; s__sp._oral_taxon_808	1.11776	-0.0751362	0.417491	-0.179971	0.857176	0.970945		k__Bacteria; p__Proteobacteria; c__Epsilonproteobacteria; o__Campylobacterales; f__Campylobacteraceae; g__Campylobacter; s__curvus	1.17721	-0.25483	0.401108	-0.635316	0.525223	0.985929		k__Bacteria; p__Bacteroidetes; c__Bacteroidia; o__Bacteroidales; f__Prevotellaceae; g__Alloprevotella; s__sp._oral_taxon_913	1.17791	0.122282	0.504007	0.24262	0.8083	NA
k__Bacteria; p__Firmicutes; c__Erysipelotrichia; o__Erysipelotrichales; f__Erysipelotrichaceae; g__Solobacterium; s__moorei	1.20849	-0.131662	0.381527	-0.345092	0.730025	NA		k__Bacteria; p__Firmicutes; c__Negativicutes; o__Selenomonadales; f__Veillonellaceae; g__Selenomonas; s__sp._oral_taxon_920	1.08745	-0.0355772	0.4187	-0.0849706	0.932285	0.970945		k__Bacteria; p__Proteobacteria; c__Gammaproteobacteria; o__Pasteurellales; f__Pasteurellaceae; g__Haemophilus; s__sp._oral_taxon_908	1.20747	0.202526	0.413375	0.489933	0.624181	0.985929		k__Bacteria; p__Firmicutes; c__Clostridia; o__Clostridiales; f__Veillonellaceae; g__Centipeda; s__sp._Oral_Taxon_B01	1.11752	0.18434	0.505595	0.364601	0.715409	NA
k__Bacteria; p__Firmicutes; c__Clostridia; o__Clostridiales; f__Peptostreptococcaceae_[XI]; g__Mogibacterium; s__timidum	1.2092	-0.0131	0.380035	-0.0344705	0.972502	NA		k__Bacteria; p__Firmicutes; c__Mollicutes; o__Mycoplasmatales; f__Mycoplasmataceae; g__Mycoplasma; s__salivarium	1.14749	-0.113444	0.416382	-0.272453	0.785274	0.970945		k__Bacteria; p__Firmicutes; c__Clostridia; o__Clostridiales; f__Lachnospiraceae_[XIV]; g__Butyrivibrio; s__sp._oral_taxon_080	1.08803	0.0432434	0.417487	0.10358	0.917502	0.985929		k__Bacteria; p__Proteobacteria; c__Gammaproteobacteria; o__Pasteurellales; f__Pasteurellaceae; g__Pasteurella; s__multocida	1.05831	-0.0119351	0.520736	-0.0229197	0.981714	NA
k__Bacteria; p__Bacteroidetes; c__Bacteroidia; o__Bacteroidales; f__Prevotellaceae; g__Prevotella; s__saccharolytica	1.23737	-0.0624208	0.378308	-0.165	0.868944	NA		k__Bacteria; p__Bacteroidetes; c__Bacteroidetes_[C-1]; o__Bacteroidetes_[O-1]; f__Bacteroidetes_[F-1]; g__Bacteroidetes_[G-3]; s__sp._oral_taxon_365	1.08803	-0.0355866	0.418703	-0.0849925	0.932267	0.970945		k__Bacteria; p__Firmicutes; c__Clostridia; o__Clostridiales; f__Veillonellaceae; g__Mitsuokella; s__sp._Oral_Taxon_G68	1.08779	-0.106404	0.412783	-0.257771	0.796583	0.985929		k__Bacteria; p__Firmicutes; c__Negativicutes; o__Selenomonadales; f__Veillonellaceae; g__Selenomonas; s__sp._oral_taxon_134	1.20553	0.0924791	0.503312	0.183741	0.854216	NA
k__Bacteria; p__Firmicutes; c__Mollicutes; o__Mycoplasmatales; f__Mycoplasmataceae; g__Mycoplasma; s__faucium	1.23788	-0.0625883	0.378573	-0.165327	0.868687	NA		k__Bacteria; p__Firmicutes; c__Bacilli; o__Lactobacillales; f__Streptococcaceae; g__Streptococcus; s__mutans	1.17663	-0.150567	0.415337	-0.362517	0.716965	0.970945		k__Bacteria; p__Firmicutes; c__Clostridia; o__Clostridiales; f__Lachnospiraceae_[XIV]; g__Shuttleworthia; s__satelles	1.11915	0.0851441	0.416299	0.204526	0.837942	0.985929		k__Bacteria; p__Firmicutes; c__Clostridia; o__Clostridiales; f__Lachnospiraceae_[XIV]; g__Johnsonella; s__sp._oral_taxon_166	1.35597	0.175928	0.488402	0.360212	0.718688	NA
k__Bacteria; p__Firmicutes; c__Erysipelotrichia; o__Erysipelotrichales; f__Erysipelotrichaceae; g__Bulleidia; s__extructa	1.14749	0.213502	0.382943	0.557529	0.577166	NA		k__Bacteria; p__Actinobacteria; c__Actinobacteria; o__Actinomycetales; f__Actinomycetaceae; g__Actinomyces; s__sp._oral_taxon_171	1.08803	-0.0355866	0.418703	-0.0849925	0.932267	0.970945		k__Bacteria; p__Firmicutes; c__Bacilli; o__Lactobacillales; f__Lactobacillaceae; g__Lactobacillus; s__kitasatonis	1.08979	0.0433257	0.417505	0.103773	0.917349	0.985929		k__Bacteria; p__Proteobacteria; c__Gammaproteobacteria; o__Pasteurellales; f__Pasteurellaceae; g__Aggregatibacter; s__sp._oral_taxon_949	1.11803	-0.0732142	0.518987	-0.141071	0.887814	NA
k__Bacteria; p__Proteobacteria; c__Gammaproteobacteria; o__Pasteurellales; f__Pasteurellaceae; g__Haemophilus; s__influenzae	1.11907	-0.104581	0.388352	-0.269294	0.787704	NA		k__Bacteria; p__Bacteroidetes; c__Bacteroidia; o__Bacteroidales; f__Prevotellaceae; g__Prevotella; s__multisaccharivorax	1.08803	-0.0355866	0.418703	-0.0849925	0.932267	0.970945		k__Bacteria; p__Proteobacteria; c__Epsilonproteobacteria; o__Campylobacterales; f__Campylobacteraceae; g__Campylobacter; s__concisus	7.65935	0.324129	0.396614	0.817239	0.413792	0.985929		k__Bacteria; p__Firmicutes; c__Erysipelotrichia; o__Erysipelotrichales; f__Erysipelotrichaceae; g__Solobacterium; s__moorei	1.20849	0.0925263	0.503327	0.18383	0.854147	NA
k__Bacteria; p__Firmicutes; c__Clostridia; o__Clostridiales; f__Eubacteriaceae_[XV]; g__Pseudoramibacter; s__alactolyticus	1.11776	0.147074	0.385751	0.381267	0.703005	NA		k__Bacteria; p__Bacteroidetes; c__Bacteroidia; o__Bacteroidales; f__Prevotellaceae; g__Prevotella; s__sp._oral_taxon_820	1.08863	-0.035596	0.418707	-0.0850141	0.93225	0.970945		k__Bacteria; p__Firmicutes; c__Negativicutes; o__Selenomonadales; f__Veillonellaceae; g__Veillonella; s__denticariosi	1.08803	0.0432434	0.417487	0.10358	0.917502	0.985929		k__Bacteria; p__Firmicutes; c__Clostridia; o__Clostridiales; f__Peptostreptococcaceae_[XI]; g__Mogibacterium; s__timidum	1.2092	0.533358	0.47867	1.11425	0.265172	NA
k__Bacteria; p__Proteobacteria; c__Deltaproteobacteria; o__Desulfobacterales; f__Desulfobulbaceae; g__Desulfobulbus; s__sp._oral_taxon_041	1.14724	-0.031273	0.384904	-0.081249	0.935244	NA		k__Bacteria; p__Firmicutes; c__Clostridia; o__Clostridiales; f__Peptostreptococcaceae_[XI]; g__Peptostreptococcaceae_[XI][G-7]; s__sp._oral_taxon_081	1.08745	-0.0355772	0.4187	-0.0849706	0.932285	0.970945		k__Bacteria; p__Spirochaetes; c__Spirochaetia; o__Spirochaetales; f__Spirochaetaceae; g__Treponema; s__sp._oral_taxon_270	1.08745	0.0432142	0.417481	0.103512	0.917557	0.985929		k__Bacteria; p__Bacteroidetes; c__Bacteroidia; o__Bacteroidales; f__Prevotellaceae; g__Prevotella; s__saccharolytica	1.23737	-0.186175	0.516112	-0.360726	0.718305	NA
k__Bacteria; p__Firmicutes; c__Clostridia; o__Clostridiales; f__Clostridiales_[F-1]; g__Clostridiales_[F-1][G-1]; s__sp._oral_taxon_093	1.17546	0.276726	0.380233	0.72778	0.466748	NA		k__Bacteria; p__Bacteroidetes; c__Bacteroidia; o__Bacteroidales; f__Prevotellaceae; g__Prevotella; s__sp._oral_taxon_515	1.08803	-0.0355866	0.418703	-0.0849925	0.932267	0.970945		k__Bacteria; p__Bacteroidetes; c__Bacteroidia; o__Bacteroidales; f__Porphyromonadaceae; g__Tannerella; s__sp._oral_taxon_808	1.11776	-0.0627891	0.411501	-0.152586	0.878725	0.985929		k__Bacteria; p__Firmicutes; c__Mollicutes; o__Mycoplasmatales; f__Mycoplasmataceae; g__Mycoplasma; s__faucium	1.23788	0.50116	0.478115	1.0482	0.294547	NA
k__Bacteria; p__Saccharibacteria_(TM7); c__TM7_[C-1]; o__TM7_[O-1]; f__TM7_[F-1]; g__TM7_[G-4]; s__sp._oral_taxon_355	1.08803	-0.0514011	0.390271	-0.131706	0.895217	NA		k__Bacteria; p__Proteobacteria; c__Gammaproteobacteria; o__Pseudomonadales; f__Pseudomonadaceae; g__Pseudomonas; s__stutzeri	1.08803	-0.0355866	0.418703	-0.0849925	0.932267	0.970945		k__Bacteria; p__Firmicutes; c__Negativicutes; o__Selenomonadales; f__Veillonellaceae; g__Selenomonas; s__sp._oral_taxon_920	1.08745	0.0432142	0.417481	0.103512	0.917557	0.985929		k__Bacteria; p__Firmicutes; c__Erysipelotrichia; o__Erysipelotrichales; f__Erysipelotrichaceae; g__Bulleidia; s__extructa	1.14749	0.601048	0.480108	1.2519	0.210605	NA
k__Bacteria; p__Gracilibacteria_(GN02); c__GN02_[C-1]; o__GN02_[O-1]; f__GN02_[F-1]; g__GN02_[G-1]; s__sp._oral_taxon_871	1.08803	0.077289	0.388922	0.198726	0.842477	NA		k__Bacteria; p__Firmicutes; c__Clostridia; o__Clostridiales; f__Peptostreptococcaceae_[XI]; g__Peptostreptococcaceae_[XI][G-1]; s__[Eubacterium]_infirmum	1.09007	-0.0356174	0.418716	-0.0850635	0.932211	0.970945		k__Bacteria; p__Firmicutes; c__Mollicutes; o__Mycoplasmatales; f__Mycoplasmataceae; g__Mycoplasma; s__salivarium	1.14749	0.125491	0.415274	0.302188	0.762509	0.985929		k__Bacteria; p__Proteobacteria; c__Gammaproteobacteria; o__Pasteurellales; f__Pasteurellaceae; g__Haemophilus; s__influenzae	1.11907	-0.0732271	0.518993	-0.141095	0.887795	NA
k__Bacteria; p__Actinobacteria; c__Actinobacteria; o__Actinomycetales; f__Actinomycetaceae; g__Actinomyces; s__georgiae	1.08745	0.0772362	0.388918	0.198593	0.842581	NA		k__Bacteria; p__Actinobacteria; c__Actinobacteria; o__Corynebacteriales; f__Corynebacteriaceae; g__Corynebacterium; s__argentoratense	1.08803	-0.0355866	0.418703	-0.0849925	0.932267	0.970945		k__Bacteria; p__Bacteroidetes; c__Bacteroidetes_[C-1]; o__Bacteroidetes_[O-1]; f__Bacteroidetes_[F-1]; g__Bacteroidetes_[G-3]; s__sp._oral_taxon_365	1.08803	0.0432434	0.417487	0.10358	0.917502	0.985929		k__Bacteria; p__Firmicutes; c__Clostridia; o__Clostridiales; f__Eubacteriaceae_[XV]; g__Pseudoramibacter; s__alactolyticus	1.11776	0.184368	0.505596	0.364655	0.715369	NA
k__Bacteria; p__Bacteroidetes; c__Flavobacteriia; o__Flavobacteriales; f__Flavobacteriaceae; g__Capnocytophaga; s__sp._oral_taxon_864	1.11718	0.147018	0.385746	0.381126	0.70311	NA		k__Bacteria; p__Spirochaetes; c__Spirochaetia; o__Spirochaetales; f__Spirochaetaceae; g__Treponema; s__sp._oral_taxon_253	1.08779	-0.0355827	0.418702	-0.0849834	0.932275	0.970945		k__Bacteria; p__Firmicutes; c__Bacilli; o__Lactobacillales; f__Streptococcaceae; g__Streptococcus; s__mutans	1.17663	-0.254875	0.401098	-0.635443	0.525139	0.985929		k__Bacteria; p__Proteobacteria; c__Deltaproteobacteria; o__Desulfobacterales; f__Desulfobulbaceae; g__Desulfobulbus; s__sp._oral_taxon_041	1.14724	0.386135	0.491967	0.784879	0.432525	NA
k__Bacteria; p__Spirochaetes; c__Spirochaetia; o__Spirochaetales; f__Spirochaetaceae; g__Treponema; s__sp._oral_taxon_257	1.32839	0.0190069	0.372277	0.0510558	0.959281	NA		k__Bacteria; p__Fusobacteria; c__Fusobacteriia; o__Fusobacteriales; f__Leptotrichiaceae; g__Sneathia; s__amnii_[NVP]	1.08803	-0.0355866	0.418703	-0.0849925	0.932267	0.970945		k__Bacteria; p__Actinobacteria; c__Actinobacteria; o__Actinomycetales; f__Actinomycetaceae; g__Actinomyces; s__sp._oral_taxon_171	1.08803	0.0432434	0.417487	0.10358	0.917502	0.985929		k__Bacteria; p__Firmicutes; c__Clostridia; o__Clostridiales; f__Clostridiales_[F-1]; g__Clostridiales_[F-1][G-1]; s__sp._oral_taxon_093	1.17546	0.122332	0.504009	0.242718	0.808224	NA
k__Bacteria; p__Actinobacteria; c__Actinobacteria; o__Actinomycetales; f__Actinomycetaceae; g__Actinobaculum; s__sp._oral_taxon_183	1.35645	-0.133526	0.37229	-0.358662	0.719848	NA		k__Bacteria; p__Actinobacteria; c__Actinobacteria; o__Bifidobacteriales; f__Bifidobacteriaceae; g__Alloscardovia; s__omnicolens	1.11895	-0.0751571	0.417499	-0.180017	0.857139	0.970945		k__Bacteria; p__Bacteroidetes; c__Bacteroidia; o__Bacteroidales; f__Prevotellaceae; g__Prevotella; s__multisaccharivorax	1.08803	0.0432434	0.417487	0.10358	0.917502	0.985929		k__Bacteria; p__Saccharibacteria_(TM7); c__TM7_[C-1]; o__TM7_[O-1]; f__TM7_[F-1]; g__TM7_[G-4]; s__sp._oral_taxon_355	1.08803	-0.0430013	0.519835	-0.0827211	0.934073	NA
k__Bacteria; p__Proteobacteria; c__Betaproteobacteria; o__Neisseriales; f__Neisseriaceae; g__Neisseria; s__bacilliformis	1.26581	0.450375	0.37423	1.20347	0.228795	NA		k__Bacteria; p__Firmicutes; c__Mollicutes; o__Mollicutes_[O-2]; f__Mollicutes_[F-2]; g__Mollicutes_[G-2]; s__sp._oral_taxon_906	1.11659	-0.0751141	0.417488	-0.179919	0.857216	0.970945		k__Bacteria; p__Bacteroidetes; c__Bacteroidia; o__Bacteroidales; f__Prevotellaceae; g__Prevotella; s__sp._oral_taxon_820	1.08863	-0.106506	0.412787	-0.258018	0.796393	0.985929		k__Bacteria; p__Gracilibacteria_(GN02); c__GN02_[C-1]; o__GN02_[O-1]; f__GN02_[F-1]; g__GN02_[G-1]; s__sp._oral_taxon_871	1.08803	-0.0430013	0.519835	-0.0827211	0.934073	NA
k__Bacteria; p__Bacteroidetes; c__Bacteroidia; o__Bacteroidales; f__Bacteroidaceae; g__Bacteroides; s__heparinolyticus	1.08803	0.077289	0.388922	0.198726	0.842477	NA		k__Bacteria; p__Actinobacteria; c__Actinobacteria; o__Actinomycetales; f__Actinomycetaceae; g__Actinomyces; s__gerencseriae	1.08863	-0.035596	0.418707	-0.0850141	0.93225	0.970945		k__Bacteria; p__Firmicutes; c__Clostridia; o__Clostridiales; f__Peptostreptococcaceae_[XI]; g__Peptostreptococcaceae_[XI][G-7]; s__sp._oral_taxon_081	1.08745	0.0432142	0.417481	0.103512	0.917557	0.985929		k__Bacteria; p__Actinobacteria; c__Actinobacteria; o__Actinomycetales; f__Actinomycetaceae; g__Actinomyces; s__georgiae	1.08745	-0.0429943	0.519832	-0.0827081	0.934084	NA
k__Bacteria; p__Proteobacteria; c__Betaproteobacteria; o__Rhodocyclales; f__Rhodocyclaceae; g__Propionivibrio; s__sp._Oral_Taxon_C33	1.08803	0.077289	0.388922	0.198726	0.842477	NA		k__Bacteria; p__Bacteroidetes; c__Flavobacteriia; o__Flavobacteriales; f__Flavobacteriaceae; g__Bergeyella; s__sp._oral_taxon_900	1.14845	0.187437	0.40575	0.461953	0.644115	0.970945		k__Bacteria; p__Bacteroidetes; c__Bacteroidia; o__Bacteroidales; f__Prevotellaceae; g__Prevotella; s__sp._oral_taxon_515	1.08803	0.0432434	0.417487	0.10358	0.917502	0.985929		k__Bacteria; p__Bacteroidetes; c__Flavobacteriia; o__Flavobacteriales; f__Flavobacteriaceae; g__Capnocytophaga; s__sp._oral_taxon_864	1.11718	-0.073203	0.518982	-0.141051	0.887829	NA
k__Bacteria; p__Firmicutes; c__Negativicutes; o__Selenomonadales; f__Veillonellaceae; g__Selenomonas; s__flueggei	1.15012	0.213804	0.382845	0.558461	0.57653	NA		k__Bacteria; p__Firmicutes; c__Erysipelotrichia; o__Erysipelotrichales; f__Erysipelotrichaceae; g__Eggerthia; s__catenaformis	1.11835	-0.0751466	0.417495	-0.179994	0.857157	0.970945		k__Bacteria; p__Proteobacteria; c__Gammaproteobacteria; o__Pseudomonadales; f__Pseudomonadaceae; g__Pseudomonas; s__stutzeri	1.08803	-0.106434	0.412784	-0.257844	0.796527	0.985929		k__Bacteria; p__Spirochaetes; c__Spirochaetia; o__Spirochaetales; f__Spirochaetaceae; g__Treponema; s__sp._oral_taxon_257	1.32839	0.775805	0.45685	1.69816	0.0894774	NA
k__Bacteria; p__Firmicutes; c__Negativicutes; o__Selenomonadales; f__Veillonellaceae; g__Veillonellaceae_[G-1]; s__sp._oral_taxon_155	1.23551	0.167672	0.376287	0.445596	0.655889	NA		k__Bacteria; p__Proteobacteria; c__Alphaproteobacteria; o__Rhizobiales; f__Methylobacteriaceae; g__Methylobacterium; s__organophilum	1.08803	-0.0355866	0.418703	-0.0849925	0.932267	0.970945		k__Bacteria; p__Firmicutes; c__Clostridia; o__Clostridiales; f__Peptostreptococcaceae_[XI]; g__Peptostreptococcaceae_[XI][G-1]; s__[Eubacterium]_infirmum	1.09007	0.0433381	0.417508	0.103802	0.917327	0.985929		k__Bacteria; p__Actinobacteria; c__Actinobacteria; o__Actinomycetales; f__Actinomycetaceae; g__Actinobaculum; s__sp._oral_taxon_183	1.35645	0.742028	0.456839	1.62426	0.104319	NA
k__Bacteria; p__Proteobacteria; c__Gammaproteobacteria; o__Xanthomonadales; f__Xanthomonadaceae; g__Vulcaniibacterium; s__thermophilum	1.08863	-0.0514399	0.390276	-0.131804	0.895139	NA		k__Bacteria; p__Spirochaetes; c__Spirochaetia; o__Spirochaetales; f__Spirochaetaceae; g__Treponema; s__pectinovorum	1.11659	-0.0751141	0.417488	-0.179919	0.857216	0.970945		k__Bacteria; p__Actinobacteria; c__Actinobacteria; o__Corynebacteriales; f__Corynebacteriaceae; g__Corynebacterium; s__argentoratense	1.08803	0.0432434	0.417487	0.10358	0.917502	0.985929		k__Bacteria; p__Proteobacteria; c__Betaproteobacteria; o__Neisseriales; f__Neisseriaceae; g__Neisseria; s__bacilliformis	1.26581	-0.212395	0.515735	-0.411829	0.680464	NA
k__Bacteria; p__Fusobacteria; c__Fusobacteriia; o__Fusobacteriales; f__Leptotrichiaceae; g__Leptotrichia; s__goodfellowii	1.23807	0.0532345	0.377114	0.141163	0.887741	NA		k__Bacteria; p__Proteobacteria; c__Betaproteobacteria; o__Neisseriales; f__Neisseriaceae; g__Simonsiella; s__muelleri	1.08873	0.121126	0.413271	0.29309	0.769453	0.970945		k__Bacteria; p__Firmicutes; c__Bacilli; o__Lactobacillales; f__Streptococcaceae; g__Streptococcus; s__multispecies_spp41_3	4.41248	0.266752	0.416275	0.640806	0.521648	0.985929		k__Bacteria; p__Bacteroidetes; c__Bacteroidia; o__Bacteroidales; f__Bacteroidaceae; g__Bacteroides; s__heparinolyticus	1.08803	-0.0430013	0.519835	-0.0827211	0.934073	NA
k__Bacteria; p__Firmicutes; c__Negativicutes; o__Selenomonadales; f__Veillonellaceae; g__Veillonellaceae_[G-1]; s__sp._oral_taxon_483	1.11776	0.147064	0.385787	0.381206	0.703051	NA		k__Bacteria; p__Firmicutes; c__Bacilli; o__Lactobacillales; f__Lactobacillaceae; g__Lactobacillus; s__iners	1.08803	-0.0355866	0.418703	-0.0849925	0.932267	0.970945		k__Bacteria; p__Spirochaetes; c__Spirochaetia; o__Spirochaetales; f__Spirochaetaceae; g__Treponema; s__sp._oral_taxon_253	1.08779	-0.106404	0.412783	-0.257771	0.796583	0.985929		k__Bacteria; p__Proteobacteria; c__Betaproteobacteria; o__Rhodocyclales; f__Rhodocyclaceae; g__Propionivibrio; s__sp._Oral_Taxon_C33	1.08803	-0.0430013	0.519835	-0.0827211	0.934073	NA
k__Bacteria; p__Spirochaetes; c__Spirochaetia; o__Spirochaetales; f__Spirochaetaceae; g__Treponema; s__sp._oral_taxon_256	1.11776	0.147074	0.385751	0.381267	0.703005	NA		k__Bacteria; p__Firmicutes; c__Negativicutes; o__Selenomonadales; f__Veillonellaceae; g__Veillonella; s__atypica	33.3171	0.230576	0.473535	0.486925	0.626311	0.970945		k__Bacteria; p__Fusobacteria; c__Fusobacteriia; o__Fusobacteriales; f__Leptotrichiaceae; g__Sneathia; s__amnii_[NVP]	1.08803	0.0432434	0.417487	0.10358	0.917502	0.985929		k__Bacteria; p__Firmicutes; c__Negativicutes; o__Selenomonadales; f__Veillonellaceae; g__Selenomonas; s__flueggei	1.15012	0.152855	0.504789	0.30281	0.762034	NA
k__Bacteria; p__Firmicutes; c__Bacilli; o__Lactobacillales; f__Lactobacillaceae; g__Lactobacillus; s__vaginalis	1.08803	-0.0514011	0.390271	-0.131706	0.895217	NA		k__Bacteria; p__Firmicutes; c__Negativicutes; o__Selenomonadales; f__Veillonellaceae; g__Veillonella; s__dispar	1.63665	0.128545	0.381515	0.336933	0.736168	0.970945		k__Bacteria; p__Actinobacteria; c__Actinobacteria; o__Bifidobacteriales; f__Bifidobacteriaceae; g__Alloscardovia; s__omnicolens	1.11895	-0.206026	0.407278	-0.505862	0.612954	0.985929		k__Bacteria; p__Firmicutes; c__Negativicutes; o__Selenomonadales; f__Veillonellaceae; g__Veillonellaceae_[G-1]; s__sp._oral_taxon_155	1.23551	0.0636326	0.502692	0.126584	0.89927	NA
k__Bacteria; p__Spirochaetes; c__Spirochaetia; o__Spirochaetales; f__Spirochaetaceae; g__Treponema; s__sp._oral_taxon_231	1.1785	-0.082541	0.38313	-0.215439	0.829425	NA		k__Bacteria; p__Synergistetes; c__Synergistia; o__Synergistales; f__Synergistaceae; g__Fretibacterium; s__sp._oral_taxon_361	1.08803	-0.0355866	0.418703	-0.0849925	0.932267	0.970945		k__Bacteria; p__Firmicutes; c__Mollicutes; o__Mollicutes_[O-2]; f__Mollicutes_[F-2]; g__Mollicutes_[G-2]; s__sp._oral_taxon_906	1.11659	0.0850041	0.416301	0.204189	0.838206	0.985929		k__Bacteria; p__Proteobacteria; c__Gammaproteobacteria; o__Xanthomonadales; f__Xanthomonadaceae; g__Vulcaniibacterium; s__thermophilum	1.08863	-0.0430082	0.519838	-0.0827339	0.934063	NA
k__Bacteria; p__Firmicutes; c__Bacilli; o__Lactobacillales; f__Streptococcaceae; g__Streptococcus; s__sobrinus	1.11776	0.147064	0.385787	0.381206	0.703051	NA		k__Bacteria; p__Fusobacteria; c__Fusobacteriia; o__Fusobacteriales; f__Leptotrichiaceae; g__Leptotrichia; s__sp._oral_taxon_909	1.08779	-0.0355827	0.418702	-0.0849834	0.932275	0.970945		k__Bacteria; p__Actinobacteria; c__Actinobacteria; o__Actinomycetales; f__Actinomycetaceae; g__Actinomyces; s__gerencseriae	1.08863	0.0432722	0.417493	0.103648	0.917449	0.985929		k__Bacteria; p__Fusobacteria; c__Fusobacteriia; o__Fusobacteriales; f__Leptotrichiaceae; g__Leptotrichia; s__goodfellowii	1.23807	-0.18618	0.51613	-0.360723	0.718307	NA
k__Bacteria; p__Bacteroidetes; c__Bacteroidia; o__Bacteroidales; f__Porphyromonadaceae; g__Porphyromonas; s__sp._oral_taxon_930	1.14749	-0.155494	0.386663	-0.402144	0.687578	NA		k__Bacteria; p__Actinobacteria; c__Coriobacteriia; o__Coriobacteriales; f__Coriobacteriaceae; g__Slackia; s__exigua	1.08803	-0.0355866	0.418703	-0.0849925	0.932267	0.970945		k__Bacteria; p__Bacteroidetes; c__Flavobacteriia; o__Flavobacteriales; f__Flavobacteriaceae; g__Bergeyella; s__sp._oral_taxon_900	1.14845	-0.161936	0.406013	-0.398845	0.690007	0.985929		k__Bacteria; p__Firmicutes; c__Negativicutes; o__Selenomonadales; f__Veillonellaceae; g__Veillonellaceae_[G-1]; s__sp._oral_taxon_483	1.11776	-0.0732097	0.518989	-0.141062	0.887821	NA
k__Bacteria; p__Proteobacteria; c__Epsilonproteobacteria; o__Campylobacterales; f__Campylobacteraceae; g__Campylobacter; s__curvus	1.17721	-0.204599	0.385015	-0.531405	0.595138	NA		k__Bacteria; p__Actinobacteria; c__Actinobacteria; o__Actinomycetales; f__Actinomycetaceae; g__Actinomyces; s__cardiffensis	1.08745	-0.0355772	0.4187	-0.0849706	0.932285	0.970945		k__Bacteria; p__Firmicutes; c__Erysipelotrichia; o__Erysipelotrichales; f__Erysipelotrichaceae; g__Eggerthia; s__catenaformis	1.11835	0.085103	0.41629	0.204432	0.838016	0.985929		k__Bacteria; p__Spirochaetes; c__Spirochaetia; o__Spirochaetales; f__Spirochaetaceae; g__Treponema; s__sp._oral_taxon_256	1.11776	-0.0732107	0.518985	-0.141065	0.887818	NA
k__Bacteria; p__Proteobacteria; c__Gammaproteobacteria; o__Pasteurellales; f__Pasteurellaceae; g__Haemophilus; s__sp._oral_taxon_908	1.20747	0.104587	0.379045	0.275922	0.782608	NA		k__Bacteria; p__Firmicutes; c__Clostridia; o__Clostridiales; f__Clostridiales Family XIII. Incertae Sedis; g__NA; s__infirmum	1.08863	-0.035596	0.418707	-0.0850141	0.93225	0.970945		k__Bacteria; p__Proteobacteria; c__Alphaproteobacteria; o__Rhizobiales; f__Methylobacteriaceae; g__Methylobacterium; s__organophilum	1.08803	-0.106434	0.412784	-0.257844	0.796527	0.985929		k__Bacteria; p__Firmicutes; c__Bacilli; o__Lactobacillales; f__Lactobacillaceae; g__Lactobacillus; s__vaginalis	1.08803	-0.0430013	0.519835	-0.0827211	0.934073	NA
k__Bacteria; p__Firmicutes; c__Clostridia; o__Clostridiales; f__Lachnospiraceae_[XIV]; g__Butyrivibrio; s__sp._oral_taxon_080	1.08803	0.077289	0.388922	0.198726	0.842477	NA		k__Bacteria; p__Bacteroidetes; c__Bacteroidia; o__Bacteroidales; f__Prevotellaceae; g__Prevotella; s__sp._oral_taxon_292	1.08745	-0.0355772	0.4187	-0.0849706	0.932285	0.970945		k__Bacteria; p__Spirochaetes; c__Spirochaetia; o__Spirochaetales; f__Spirochaetaceae; g__Treponema; s__pectinovorum	1.11659	0.0850041	0.416301	0.204189	0.838206	0.985929		k__Bacteria; p__Spirochaetes; c__Spirochaetia; o__Spirochaetales; f__Spirochaetaceae; g__Treponema; s__sp._oral_taxon_231	1.1785	0.122268	0.504013	0.242589	0.808324	NA
k__Bacteria; p__Firmicutes; c__Clostridia; o__Clostridiales; f__Veillonellaceae; g__Mitsuokella; s__sp._Oral_Taxon_G68	1.08779	-0.0513848	0.390268	-0.131665	0.895249	NA		k__Bacteria; p__Proteobacteria; c__Gammaproteobacteria; o__Enterobacterales; f__Enterobacteriaceae; g__Escherichia; s__vulneris	1.08803	-0.0355866	0.418703	-0.0849925	0.932267	0.970945		k__Bacteria; p__Proteobacteria; c__Betaproteobacteria; o__Neisseriales; f__Neisseriaceae; g__Simonsiella; s__muelleri	1.08873	0.043277	0.417494	0.103659	0.91744	0.985929		k__Bacteria; p__Firmicutes; c__Bacilli; o__Lactobacillales; f__Streptococcaceae; g__Streptococcus; s__sobrinus	1.11776	-0.0732097	0.518989	-0.141062	0.887821	NA
k__Bacteria; p__Firmicutes; c__Clostridia; o__Clostridiales; f__Lachnospiraceae_[XIV]; g__Shuttleworthia; s__satelles	1.11915	0.0219153	0.386852	0.0566504	0.954824	NA		k__Bacteria; p__Bacteroidetes; c__Bacteroides; o__Bacteroidales; f__Prevotellaceae; g__Prevotella; s__sp._Oral_Taxon_D21	1.08745	-0.0355772	0.4187	-0.0849706	0.932285	0.970945		k__Bacteria; p__Firmicutes; c__Bacilli; o__Lactobacillales; f__Lactobacillaceae; g__Lactobacillus; s__iners	1.08803	-0.106434	0.412784	-0.257844	0.796527	0.985929		k__Bacteria; p__Bacteroidetes; c__Bacteroidia; o__Bacteroidales; f__Porphyromonadaceae; g__Porphyromonas; s__sp._oral_taxon_930	1.14749	-0.102594	0.518203	-0.19798	0.84306	NA
k__Bacteria; p__Firmicutes; c__Bacilli; o__Lactobacillales; f__Lactobacillaceae; g__Lactobacillus; s__kitasatonis	1.08979	0.0774376	0.388937	0.199101	0.842184	NA		k__Bacteria; p__Bacteroidetes; c__Bacteroidia; o__Bacteroidales; f__Porphyromonadaceae; g__Porphyromonas; s__sp._oral_taxon_277	1.08803	-0.0355866	0.418703	-0.0849925	0.932267	0.970945		k__Bacteria; p__Firmicutes; c__Negativicutes; o__Selenomonadales; f__Veillonellaceae; g__Veillonella; s__atypica	33.3171	0.720879	0.474585	1.51897	0.128771	0.985929		k__Bacteria; p__Proteobacteria; c__Epsilonproteobacteria; o__Campylobacterales; f__Campylobacteraceae; g__Campylobacter; s__curvus	1.17721	-0.131192	0.517461	-0.253531	0.799858	NA
k__Bacteria; p__Firmicutes; c__Negativicutes; o__Selenomonadales; f__Veillonellaceae; g__Veillonella; s__denticariosi	1.08803	0.077289	0.388922	0.198726	0.842477	NA		k__Bacteria; p__Firmicutes; c__Clostridia; o__Clostridiales; f__Lachnospiraceae[14]; g__Catonella; s__sp._Oral_Taxon_B06	1.08803	0.121094	0.413268	0.293015	0.769511	0.970945		k__Bacteria; p__Firmicutes; c__Negativicutes; o__Selenomonadales; f__Veillonellaceae; g__Veillonella; s__dispar	1.63665	0.155329	0.389886	0.398395	0.690339	0.985929		k__Bacteria; p__Proteobacteria; c__Gammaproteobacteria; o__Pasteurellales; f__Pasteurellaceae; g__Haemophilus; s__sp._oral_taxon_908	1.20747	-0.159036	0.516788	-0.307739	0.758281	NA
k__Bacteria; p__Spirochaetes; c__Spirochaetia; o__Spirochaetales; f__Spirochaetaceae; g__Treponema; s__sp._oral_taxon_270	1.08745	0.0772362	0.388918	0.198593	0.842581	NA		k__Bacteria; p__Firmicutes; c__Erysipelotrichia; o__Erysipelotrichales; f__Erysipelotrichaceae; g__Erysipelotrichaceae_[G-1]; s__sp._oral_taxon_905	1.08803	-0.0355866	0.418703	-0.0849925	0.932267	0.970945		k__Bacteria; p__Synergistetes; c__Synergistia; o__Synergistales; f__Synergistaceae; g__Fretibacterium; s__sp._oral_taxon_361	1.08803	0.0432434	0.417487	0.10358	0.917502	0.985929		k__Bacteria; p__Firmicutes; c__Clostridia; o__Clostridiales; f__Lachnospiraceae_[XIV]; g__Butyrivibrio; s__sp._oral_taxon_080	1.08803	-0.0430013	0.519835	-0.0827211	0.934073	NA
k__Bacteria; p__Synergistetes; c__Synergistia; o__Synergistales; f__Dethiosulfovibrionaceae; g__Pyramidobacter; s__piscolens	1.05831	0.0038937	0.392349	0.00992406	0.992082	NA		k__Bacteria; p__Spirochaetes; c__Spirochaetia; o__Spirochaetales; f__Spirochaetaceae; g__Treponema; s__sp._oral_taxon_234	1.08803	-0.0355866	0.418703	-0.0849925	0.932267	0.970945		k__Bacteria; p__Fusobacteria; c__Fusobacteriia; o__Fusobacteriales; f__Leptotrichiaceae; g__Leptotrichia; s__sp._oral_taxon_909	1.08779	-0.106404	0.412783	-0.257771	0.796583	0.985929		k__Bacteria; p__Firmicutes; c__Clostridia; o__Clostridiales; f__Veillonellaceae; g__Mitsuokella; s__sp._Oral_Taxon_G68	1.08779	0.216687	0.506493	0.427818	0.668784	NA
k__Bacteria; p__Bacteroidetes; c__Bacteroidia; o__Bacteroidales; f__Porphyromonadaceae; g__Tannerella; s__sp._oral_taxon_808	1.11776	0.0218991	0.386839	0.0566104	0.954856	NA		k__Bacteria; p__Firmicutes; c__Negativicutes; o__Selenomonadales; f__Veillonellaceae; g__Veillonellaceae_[G-1]; s__sp._oral_taxon_129	1.08745	-0.0355772	0.4187	-0.0849706	0.932285	0.970945		k__Bacteria; p__Actinobacteria; c__Coriobacteriia; o__Coriobacteriales; f__Coriobacteriaceae; g__Slackia; s__exigua	1.08803	0.0432434	0.417487	0.10358	0.917502	0.985929		k__Bacteria; p__Firmicutes; c__Clostridia; o__Clostridiales; f__Lachnospiraceae_[XIV]; g__Shuttleworthia; s__satelles	1.11915	-0.0732286	0.518993	-0.141097	0.887793	NA
k__Bacteria; p__Firmicutes; c__Negativicutes; o__Selenomonadales; f__Veillonellaceae; g__Selenomonas; s__sp._oral_taxon_920	1.08745	0.0772362	0.388918	0.198593	0.842581	NA		k__Bacteria; p__Firmicutes; c__Bacilli; o__Bacillales; f__Staphylococcaceae; g__Staphylococcus; s__sciuri	1.08863	-0.035596	0.418707	-0.0850141	0.93225	0.970945		k__Bacteria; p__Actinobacteria; c__Actinobacteria; o__Actinomycetales; f__Actinomycetaceae; g__Actinomyces; s__cardiffensis	1.08745	0.0432142	0.417481	0.103512	0.917557	0.985929		k__Bacteria; p__Firmicutes; c__Bacilli; o__Lactobacillales; f__Lactobacillaceae; g__Lactobacillus; s__kitasatonis	1.08979	-0.0430211	0.519844	-0.0827577	0.934044	NA
k__Bacteria; p__Firmicutes; c__Mollicutes; o__Mycoplasmatales; f__Mycoplasmataceae; g__Mycoplasma; s__salivarium	1.14749	0.213502	0.382943	0.557529	0.577166	NA		k__Bacteria; p__Spirochaetes; c__Spirochaetia; o__Spirochaetales; f__Spirochaetaceae; g__Treponema; s__parvum	1.08745	-0.0355772	0.4187	-0.0849706	0.932285	0.970945		k__Bacteria; p__Firmicutes; c__Clostridia; o__Clostridiales; f__Clostridiales Family XIII. Incertae Sedis; g__NA; s__infirmum	1.08863	0.0432722	0.417493	0.103648	0.917449	0.985929		k__Bacteria; p__Firmicutes; c__Negativicutes; o__Selenomonadales; f__Veillonellaceae; g__Veillonella; s__denticariosi	1.08803	-0.0430013	0.519835	-0.0827211	0.934073	NA
k__Bacteria; p__Bacteroidetes; c__Bacteroidetes_[C-1]; o__Bacteroidetes_[O-1]; f__Bacteroidetes_[F-1]; g__Bacteroidetes_[G-3]; s__sp._oral_taxon_365	1.08803	-0.0514011	0.390271	-0.131706	0.895217	NA		k__Bacteria; p__Firmicutes; c__Clostridia; o__Clostridiales; f__Peptostreptococcaceae_[XI]; g__Peptostreptococcaceae_[XI][G-1]; s__sp._oral_taxon_383	1.08863	-0.035596	0.418707	-0.0850141	0.93225	0.970945		k__Bacteria; p__Bacteroidetes; c__Bacteroidia; o__Bacteroidales; f__Prevotellaceae; g__Prevotella; s__sp._oral_taxon_292	1.08745	0.0432142	0.417481	0.103512	0.917557	0.985929		k__Bacteria; p__Spirochaetes; c__Spirochaetia; o__Spirochaetales; f__Spirochaetaceae; g__Treponema; s__sp._oral_taxon_270	1.08745	-0.0429943	0.519832	-0.0827081	0.934084	NA
k__Bacteria; p__Firmicutes; c__Bacilli; o__Lactobacillales; f__Streptococcaceae; g__Streptococcus; s__mutans	1.17663	-0.0824845	0.38325	-0.215224	0.829593	NA		k__Bacteria; p__Firmicutes; c__Negativicutes; o__Selenomonadales; f__Veillonellaceae; g__Veillonella; s__sp._oral_taxon_917	2.07461	0.39758	0.431698	0.920968	0.357067	0.970945		k__Bacteria; p__Firmicutes; c__Negativicutes; o__Selenomonadales; f__Veillonellaceae; g__Veillonella; s__rogosae	29.591	-0.190068	0.45302	-0.419558	0.674808	0.985929		k__Bacteria; p__Synergistetes; c__Synergistia; o__Synergistales; f__Dethiosulfovibrionaceae; g__Pyramidobacter; s__piscolens	1.05831	-0.0119351	0.520736	-0.0229197	0.981714	NA
k__Bacteria; p__Actinobacteria; c__Actinobacteria; o__Actinomycetales; f__Actinomycetaceae; g__Actinomyces; s__sp._oral_taxon_171	1.08803	-0.0514011	0.390271	-0.131706	0.895217	NA		k__Bacteria; p__Saccharibacteria_(TM7); c__TM7_[C-1]; o__TM7_[O-1]; f__TM7_[F-1]; g__TM7_[G-1]; s__sp._oral_taxon_352	46.9531	0.421315	0.444653	0.947515	0.343377	0.970945		k__Bacteria; p__Proteobacteria; c__Gammaproteobacteria; o__Enterobacterales; f__Enterobacteriaceae; g__Escherichia; s__vulneris	1.08803	-0.106434	0.412784	-0.257844	0.796527	0.985929		k__Bacteria; p__Bacteroidetes; c__Bacteroidia; o__Bacteroidales; f__Porphyromonadaceae; g__Tannerella; s__sp._oral_taxon_808	1.11776	-0.0732107	0.518985	-0.141065	0.887818	NA
k__Bacteria; p__Bacteroidetes; c__Bacteroidia; o__Bacteroidales; f__Prevotellaceae; g__Prevotella; s__multisaccharivorax	1.08803	0.077289	0.388922	0.198726	0.842477	NA		k__Bacteria; p__Proteobacteria; c__Betaproteobacteria; o__Neisseriales; f__Neisseriaceae; g__Neisseria; s__mucosa	1.87	-0.587782	0.439546	-1.33725	0.181141	0.970945		k__Bacteria; p__Bacteroidetes; c__Bacteroides; o__Bacteroidales; f__Prevotellaceae; g__Prevotella; s__sp._Oral_Taxon_D21	1.08745	0.0432142	0.417481	0.103512	0.917557	0.985929		k__Bacteria; p__Firmicutes; c__Negativicutes; o__Selenomonadales; f__Veillonellaceae; g__Selenomonas; s__sp._oral_taxon_920	1.08745	-0.0429943	0.519832	-0.0827081	0.934084	NA
[truncated: 47 more rows]

## Sheet: Table S6-Diff.Indic.Species
Table S6_Differential Species Detection Rate and Group Abundances			P Group				H Group
Species		P Total Count, n=15	P Mean Count/Sample	Detection Rate		H Total Count, n=20	H Mean Count/Sample	Detetction rate
k__Bacteria;p__Fusobacteria;c__Fusobacteriia;o__Fusobacteriales;f__Leptotrichiaceae;g__Leptotrichia;s__hofstadii		34	2.26667	0.333333		87	4.35	0.55
k__Bacteria;p__Spirochaetes;c__Spirochaetia;o__Spirochaetales;f__Spirochaetaceae;g__Treponema;s__sp._oral_taxon_237		56	3.73333	0.333333		0	0	0
[truncated: 17 more rows]
